# Supplementary material for: Structural insights into sodium transport by the oxaloacetate decarboxylase sodium pump
Source: eLife. 2020 May 27;9:e53853. doi: 10.7554/eLife.53853 (PMC7274780; doi:10.7554/eLife.53853)
Supplement: Figure 4—source data 1. [file elife-53853-fig4-data1.xlsx]

## Sheet: Sheet1
WT						D203A					S382A					N412A
Time (S)	(mCal/S)	Molar ratio	Cal/mole of injectant	fit		Time (S)	(mCal/S)	Molar ratio	Cal/mole of injectant		Time (S)	(mCal/S)	Molar ratio	Cal/mole of injectant		Time (S)	(mCal/S)	Molar ratio	Cal/mole of injectant	fit
5	0.00166382	0.821422		-123.381		5	-0.000102409	0.821422			5	-0.00208488	0.821422			5	2.04591e-05	﻿0.821422		-31.6569
10	0.0011928	4.95277	-95.6864	-106.778		10	0.00120302	4.95277	-2.12174		10	-0.000830342	4.95277	-3.05253		10	0.000940459	4.95277	-23.3073	-30.6273
15	-0.000608217	9.12453	-101.149	-84.9087		15	-0.000230549	9.12453	-4.77866		15	0.000515757	9.12453	-4.12372		15	-0.00167954	9.12453	-33.341	-28.8758
20	0.00180064	13.3367	-73.2869	-68.8096		20	0.00105214	13.3367	-3.45889		20	0.00117333	13.3367	-5.84116		20	0.00012762	13.3367	-31.8888	-27.0891
25	0.00221824	17.5893	-54.4954	-56.6812		25	-8.34966e-05	17.5893	-4.10427		25	-0.000468762	17.5893	-6.16222		25	-0.00131337	17.5893	-27.3477	-25.2897
30	0.000955692	21.8822	-46.21	-47.3541		30	-0.00027514	21.8822	-3.44746		30	0.000109345	21.8822	-5.66148		30	0.00229137	21.8822	-23.1154	-23.5009
35	-0.00255082	26.2156	-38.7808	-40.0492		35	-0.00010514	26.2156	-3.52753		35	-0.00112183	26.2156	-4.49827		35	0.000884729	26.2156	-21.689	-21.7453
40	-0.00100967	30.5894	-30.7178	-34.2351		40	7.82933e-05	30.5894	-3.40182		40	0.000697526	30.5894	-3.84339		40	-0.00020645	30.5894	-20.0741	-20.0437
45	0.000704284	35.0036	-27.7773	-29.5408		45	0.000316006	35.0036	-2.65523		45	0.00188753	35.0036	-3.31492		45	0.0015167	35.0036	-17.7147	-18.414
50	0.00209928	39.4582	-24.1825	-25.7019		50	-0.00012343	39.4582	-3.21509		50	0.000409134	39.4582	-3.79426		50	-0.000476297	39.4582	-13.7568	-16.8698
55	-1.18607e-05	43.9531	-19.4024	-22.5267		55	-0.000223514	43.9531	-3.0286		55	0.000310737	43.9531	-3.63895		55	0.00072223	43.9531	-14.0107	-15.4212
60	-0.000676023	48.4885	-21.0974	-19.8733		60	0.000669239	48.4885	-2.85728		60	-0.000159263	48.4885	-3.57362		60	0.00124637	48.4885	-12.9195	-14.0738
65	-0.000666658	53.0643	-18.5178	-17.6354		65	0.000594731	53.0643	-2.8472		65	0.00107658	53.0643	-3.29229		65	5.00313e-05	53.0643	-11.1804	-12.8298
70	-0.000444879	57.6805	-15.269	-15.7321		70	-0.000541552	57.6805	-2.16393		70	-0.000379272	57.6805	-2.97009		70	-0.000415731	57.6805	-11.807	-11.6883
75	-0.000664752	62.3372	-12.7642	-14.101		75	0.000246463	62.3372	-1.33526		75	-0.000739762	62.3372	-2.26584		75	0.000623277	62.3372	-10.8211	-10.6462
80	-0.00113505	67.0342	-12.7121	-12.6935		80	-9.03829e-05	67.0342	-1.7142		80	-0.00161426	67.0342	-0.939158		80	-0.000457856	67.0342	-10.4158	-9.69864
85	-0.00239442	71.7716	-11.4866	-11.471		85	0.000508435	71.7716	-2.43006		85	0.0016499	71.7716	-3.25375		85	-0.000640528	71.7716	-10.5036	-8.83955
90	-0.000479215	76.5494	-10.3475	-10.4031		90	-0.000596017	76.5494	-3.16223		90	0.000301407	76.5494	-3.76348		90	0.000673864	76.5494	-9.27435	-8.06236
95	-0.00155883	81.3676	-8.87454	-9.46508		95	0.000677699	81.3676	-2.26195		95	-0.00130274	81.3676	-2.54568		95	0.00142287	81.3676	-9.08934	-7.36024
100	-0.0013443					100	0.000577844	86.2263	-2.29664		100	-0.00153211	86.2263	-1.07177		100	0.0012685
105	-0.00106827					105	0.00103718				105	0.000478427				105	0.000112135
110	-0.00266011					110	-1.48234e-05				110	0.00059673				110	0.000282657
115	-0.001035					115	0.000792657				115	0.00084303				115	0.00115803
120	0.000106552					120	-0.000389964				120	-0.0020627				120	-0.000810218
125	0.00145706					125	-0.0011519				125	-0.000170246				125	0.000113446
130	0.000937626					130	0.000687199				130	2.22094e-05				130	0.000811365
135	-8.12302e-05					135	0.00053748				135	0.00152466				135	-0.000754068
140	-0.000777426					140	-8.56926e-05				140	-0.00171793				140	0.000629772
145	-0.00062679					145	0.000540858				145	-0.00156427				145	-0.000538459
150	-0.00191137					150	-0.00101865				150	-0.00109181				150	-0.000468889
155	-0.00116252					155	0.000726051				155	0.000604872				155	0.0012918
160	0.000686284					160	0.000590457				160	0.000279024				160	-0.000478565
165	0.00218552					165	-0.000269115				165	0.00160646				165	0.000188763
170	-0.000500548					170	0.000413864				170	0.00022336				170	-0.000373909
175	0.000438562					175	-0.000468104				175	0.000655436				175	-0.00094658
180	0.00155835					180	0.00165476				180	-0.000419022				180	0.00166075
185	-0.0255833					185	0.000367365				185	0.00081966				185	-0.0131819
190	-0.532165					190	-0.0500203				190	-0.0220873				190	-0.188478
195	-0.596352					195	0.00333485				195	-0.0494879				195	-0.143189
200	-0.291879					200	-0.00183946				200	-0.00333378				200	-0.0491903
205	-0.146072					205	-0.00355902				205	0.00327191				205	-0.0230613
210	-0.0917555					210	0.00276022				210	-0.00156063				210	-0.0187464
215	-0.0597834					215	0.00231209				215	-0.000522324				215	-0.0121354
220	-0.041061					220	-0.000363769				220	0.00179071				220	-0.00713445
225	-0.031422					225	0.000354662				225	0.00189108				225	-0.00512497
230	-0.0229323					230	0.0012264				230	-0.000831521				230	-0.00398596
235	-0.0183251					235	-0.000396129				235	-0.000408543				235	-0.00313522
240	-0.0147865					240	0.000267192				240	0.00191353				240	-0.00252889
245	-0.0128297					245	-0.000389634				245	0.000815677				245	0.000948932
250	-0.00956053					250	0.000155476				250	0.000273602				250	8.89317e-05
255	-0.00975253					255	0.000452224				255	8.07623e-05				255	-0.000105264
260	-0.00637127					260	0.00074698				260	0.00153315				260	-0.000352592
265	-0.00421068					265	0.000383407				265	0.000731078				265	0.000685506
270	-0.000915671					270	-0.000481609				270	9.10642e-05				270	0.000155506
275	-0.00101105					275	0.000503965				275	0.000479747				275	0.00162218
280	0.000159328					280	0.000856749				280	0.00232049				280	0.000538513
285	0.000585486					285	-0.00114465				285	-0.000188288				285	0.00113401
290	-0.000610041					290	-0.00125593				290	0.000596548				290	-0.00233469
295	-0.000205999					295	8.69393e-05				295	-0.000311678				295	-0.00246267
300	0.000163747					300	0.000708698				300	0.00119485				300	-0.000469002
305	-0.0857965					305	-0.00553024				305	0.00203391				305	-0.112726
310	-0.657937					310	-0.0748299				310	-0.0363095				310	-0.262989
315	-0.568997					315	0.0047742				315	-0.0548812				315	-0.133033
320	-0.269857					320	-0.0139324				320	0.00118572				320	-0.0409767
325	-0.144817					325	-0.002046				325	0.00108668				325	-0.0297639
330	-0.0926569					330	-0.00016241				330	-0.00324596				330	-0.0231039
335	-0.0615994					335	0.000663959				335	-0.00227139				335	-0.0161269
340	-0.0418699					340	-0.000104169				340	-0.000921391				340	-0.0111133
345	-0.0276367					345	0.000121441				345	0.0019216				345	-0.00891013
350	-0.0212167					350	-0.000646885				350	0.00158485				350	-0.00705113
355	-0.0159604					355	-0.000279456				355	-8.76084e-05				355	-0.00510736
360	-0.0138608					360	-0.000790088				360	-0.000310395				360	-0.00479736
365	-0.00891939					365	9.94983e-06				365	0.00147036				365	-0.00298963
370	-0.00597117					370	-0.00031419				370	0.00213346				370	-0.000802302
375	-0.00506175					375	-0.000764742				375	0.00288984				375	-0.0014829
380	-0.00241389					380	-0.000376959				380	0.00147238				380	0.000629768
385	-0.00250631					385	-0.000222378				385	0.0018326				385	-0.000737756
390	0.00171509					390	-7.41714e-05				390	-0.00103489				390	-0.00116241
395	0.00155648					395	-3.41482e-05				395	-5.39826e-05				395	-0.000973503
400	0.00114754					400	-6.23637e-05				400	-0.00151224				400	0.000520161
405	6.84965e-05					405	0.000120925				405	-0.00168565				405	-0.0017175
410	-0.0019735					410	-0.000528736				410	-0.00157651				410	-0.0012675
415	-0.000796356					415	0.000535202				415	-0.000252339				415	0.000150552
420	0.00111692					420	0.000406204				420	-0.00143819				420	0.000456888
425	-0.0576916					425	-0.0110246				425	-0.00179196				425	-0.117417
430	-0.502755					430	-0.0675249				430	-0.0408654				430	-0.234815
435	-0.425511					435	0.0217008				435	-0.0523887				435	-0.110304
440	-0.190672					440	-0.00315463				440	0.000232265				440	-0.0414846
445	-0.101027					445	-0.00384818				445	0.00286115				445	-0.0320483
450	-0.0645873					450	-0.00080538				450	-0.00121853				450	-0.0275845
455	-0.0407436					455	-0.00117704				455	-0.00347362				455	-0.0192245
460	-0.0269453					460	0.000704967				460	-0.00118686				460	-0.0149906
465	-0.0186444					465	-0.000410339				465	-0.00065451				465	-0.011588
470	-0.0101188					470	-0.000586766				470	-0.00137621				470	-0.00889923
475	-0.00552259					475	0.0019384				475	-0.000917903				475	-0.00751557
480	-0.0040914					480	-9.67013e-05				480	-0.0010296				480	-0.00386911
485	-0.00271163					485	-0.00102027				485	-0.00184143				485	-0.0045501
490	-0.00367643					490	0.000454555				490	-0.00107898				490	-0.0018616
495	-0.00125493					495	-0.000328015				495	-0.000796523				495	-0.00105061
500	-0.00142712					500	-0.000458844				500	-0.00311674				500	9.77301e-05
505	-0.00243524					505	-1.80459e-05				505	-0.00114687				505	0.0013504
510	-0.00183514					510	-0.00148961				510	-0.000342716				510	0.00104307
515	-0.00104201					515	-0.00034177				515	-0.000878565				515	-8.42549e-05
520	-0.00125811					520	0.00212524				520	-0.00118441				520	-0.00172392
525	-0.000340841					525	-0.00857966				525	-0.00103431				525	0.000303104
530	9.96154e-05					530	0.00168549				530	-0.000902703				530	-0.000188475
535	0.00075447					535	0.00189192				535	-0.000481007				535	0.000591525
540	0.0018843					540	-0.00101845				540	0.00120379				540	-4.04472e-05
545	-0.0515308					545	-0.0232081				545	-0.00355621				545	-0.129485
550	-0.4204					550	-0.0585629				550	-0.0464005				550	-0.204756
555	-0.320283					555	0.00753531				555	-0.0643194				555	-0.0842871
560	-0.133829					560	-0.00572287				560	-0.00640639				560	-0.0315239
565	-0.0709782					565	-0.00109083				565	-0.00221586				565	-0.0255712
570	-0.0444892					570	9.54343e-05				570	-0.00281925				570	-0.0197179
575	-0.0261933					575	0.00161988				575	-0.00176247				575	-0.0174599
580	-0.0170179					580	-0.000457743				580	-0.00188456				580	-0.0119064
585	-0.0101746					585	0.000238401				585	0.00125638				585	-0.00839476
590	-0.00387139					590	0.000621633				590	0.00203485				590	-0.00574308
595	-0.0010788					595	-0.00161061				595	-0.000355278				595	-0.0026714
600	0.00245364					600	-0.00067876				600	-0.000923582				600	-0.00229973
605	0.00110771					605	0.00107191				605	0.000245651				605	-0.00213805
610	0.00115119					610	0.000233918				610	-0.00044926				610	-0.000930969
615	0.00121839					615	0.00127411				615	-3.51892e-05				615	0.000653382
620	-0.000125265					620	0.000186963				620	0.000562356				620	-0.00120102
625	0.000276624					625	-0.00114433				625	0.0002899				625	0.000276306
630	-0.000262412					630	-0.000259899				630	0.000954639				630	9.97881e-05
635	0.000595445					635	0.000625971				635	0.00337049				635	0.000146811
640	0.000852402					640	-0.000992744				640	-0.000104088				640	0.000303833
645	0.000204645					645	-0.000258485				645	-5.90953e-05				645	7.68004e-05
650	-8.35195e-05					650	0.000736638				650	-0.000524006				650	0.000175502
655	-0.00067049					655	-0.00128783				655	-0.000328137				655	-0.000808106
660	0.00028951					660	0.000116304				660	0.000928469				660	-0.0075591
665	-0.0492229					665	-0.0188488				665	4.55224e-05				665	-0.165282
670	-0.360823					670	-0.0502141				670	-0.0444472				670	-0.163786
675	-0.254564					675	0.00325706				675	-0.0537218				675	-0.0554486
680	-0.102274					680	-0.0119409				680	-0.000635825				680	-0.0193396
685	-0.0551335					685	0.00554981				685	0.00128618				685	-0.0171154
690	-0.0348234					690	0.00186299				690	-0.00212716				690	-0.0122127
695	-0.0211849					695	0.00157101				695	-0.00274019				695	-0.00932946
700	-0.0153451					700	0.000152732				700	-0.00302019				700	-0.00588511
705	-0.0116279					705	0.000946699				705	-0.00239031				705	-0.00379076
710	-0.00778829					710	-0.000169791				710	-0.00276662				710	-0.00372641
715	-0.00404299					715	-0.000392362				715	-0.00290922				715	-0.0013507
720	-0.00151311					720	0.000434108				720	-0.00120593				720	0.000614644
725	-0.00216108					725	0.000347423				725	0.000465744				725	0.00022038
730	-0.00249032					730	-0.00142637				730	-0.000857982				730	-0.000997255
735	-0.00101666					735	0.000255284				735	-0.00240946				735	0.00164366
740	-0.000484542					740	0.000802761				740	0.00118714				740	0.00215366
745	-0.00132651					745	-2.3418e-05				745	0.000793131				745	-0.000115994
750	-0.000307997					750	-0.000470301				750	0.00179898				750	0.000287364
755	0.0002133					755	0.000217567				755	0.000654827				755	-0.000850117
760	0.00131343					760	-0.000762806				760	0.000880676				760	-6.94302e-05
765	0.00152949					765	0.000932616				765	-0.00231348				765	0.00133339
770	0.000948496					770	-0.00184853				770	-0.000207999				770	0.000247205
775	-0.000118475					775	-0.000450459				775	0.00104276				775	-0.00124107
780	0.00309345					780	0.000970035				780	0.000770177				780	-0.0187715
785	-0.0564446					785	-0.0296281				785	-0.0019376				785	-0.176589
790	-0.321811					790	-0.0399754				790	-0.0470776				790	-0.13996
795	-0.189702					795	0.00805355				795	-0.0467605				795	-0.0452265
800	-0.072461					800	-0.0134469				800	0.0015427				800	-0.0195202
805	-0.0439812					805	-0.00089889				805	0.00132761				805	-0.0149891
810	-0.0298313					810	0.00404048				810	-0.00236286				810	-0.0103001
815	-0.0204414					815	0.000396376				815	-0.000736252				815	-0.00603421
820	-0.012734					820	-0.000302923				820	-0.00126261				820	-0.000839856
825	-0.0103844					825	0.000295846				825	-0.00355531				825	-0.00148939
830	-0.00766432					830	-0.000734315				830	-0.00171286				830	0.00128129
835	-0.00479508					835	-0.000513289				835	0.000199598				835	0.000464178
840	-0.00313473					840	-0.000910999				840	0.00258205				840	0.00167362
845	-0.00131473					845	0.000392858				845	0.00395622				845	0.00118366
850	-0.00187755					850	0.000141935				850	0.00135518				850	-0.000409511
855	-0.00200742					855	0.00104531				855	0.00298179				855	-0.00034268
860	-0.000392291					860	0.000640678				860	0.00172014				860	7.98412e-05
865	-0.000861401					865	0.000907358				865	0.00125599				865	-0.000617059
870	0.00016178					870	0.000359658				870	0.000767723				870	-0.000907812
875	2.92061e-05					875	0.000602674				875	-0.000929747				875	-0.00208658
880	-0.000289086					880	-0.000307624				880	-0.00121314				880	-0.0013709
885	-0.000736512					885	-0.000262429				885	-0.00110827				885	-0.000487765
890	0.00143775					890	-0.000785757				890	0.00103292				890	0.00109744
895	0.000628892					895	0.00132342				895	-0.00111953				895	0.00160851
900	0.0018515					900	-3.54272e-05				900	-0.00195437				900	-0.017838
905	-0.0685688					905	-0.0355334				905	0.000320539				905	-0.166942
910	-0.28706					910	-0.0278001				910	-0.047233				910	-0.124398
915	-0.14092					915	0.000123246				915	-0.03168				915	-0.0391167
920	-0.0483501					920	-0.0046333				920	0.00220411				920	-0.0160299
925	-0.0282303					925	-0.00485845				925	-0.00216979				925	-0.0146236
930	-0.0147302					930	0.00230858				930	-0.000288271				930	-0.0106609
935	-0.00882042					935	0.00196242				935	0.000612497				935	-0.00842826
940	-0.00659085					940	-0.00144761				940	-0.0002392				940	-0.00503695
945	-0.00433136					945	-0.000804338				945	0.000939104				945	-0.00258695
950	-0.00216063					950	-0.000712989				950	0.0031081				950	-4.65672e-05
955	-0.00112075					955	-6.73696e-05				955	0.00323056				955	-0.000458552
960	-0.00292957					960	0.000784634				960	0.000313992				960	-0.000848299
965	-0.00280033					965	-0.000550569				965	-0.00239481				965	0.0011214
970	-0.0020126					970	0.00170361				970	-0.00185651				970	0.00226277
975	0.00024765					975	0.000410751				975	0.00144886				975	0.0024191
980	-0.0025221					980	-0.000224647				980	0.00112208				980	-0.000278128
985	-0.000884865					985	0.000220211				985	0.00161685				985	-0.00077912
990	0.00143513					990	0.000660722				990	0.000660409				990	7.02929e-05
995	0.001669					995	0.000277311				995	-0.00138129				995	-0.000695356
1000	-2.93491e-05					1000	0.000117757				1000	-0.00098962				1000	-0.000242852
1005	0.00161035					1005	0.0010968				1005	-0.00323454				1005	-0.0013782
1010	0.00164445					1010	0.000924283				1010	8.52836e-05				1010	0.000186056
1015	0.000417242					1015	0.000579752				1015	0.000178908				1015	0.000335063
1020	0.00171845					1020	-0.00285565				1020	-0.0020377				1020	-0.0277812
1025	-0.0655635					1025	-0.0606229				1025	-0.000840768				1025	-0.163787
1030	-0.25998					1030	0.0135104				1030	-0.0477489				1030	-0.103664
1035	-0.121655					1035	-0.00130254				1035	-0.0248147				1035	-0.0270972
1040	-0.0454353					1040	-0.00584555				1040	0.00448007				1040	-0.0124011
1045	-0.0269537					1045	0.00162976				1045	0.00292819				1045	-0.0117648
1050	-0.0174239					1050	0.00170297				1050	-0.00121776				1050	-0.00898874
1055	-0.0116078					1055	-0.00155674				1055	-0.00166022				1055	-0.00629142
1060	-0.00731802					1060	0.000276184				1060	-0.00065946				1060	-0.00069863
1065	-0.00493007					1065	0.000276685				1065	0.00134307				1065	-0.000301759
1070	-0.00276007					1070	-0.000323297				1070	0.00210968				1070	0.00115511
1075	-0.00100636					1075	-0.0012707				1075	0.00151319				1075	0.00134224
1080	0.000428412					1080	-8.49157e-05				1080	0.00129799				1080	-0.00090494
1085	-0.000836076					1085	7.61813e-05				1085	0.000972139				1085	0.00218545
1090	-0.00189828					1090	-0.000772817				1090	-0.00129371				1090	0.00304813
1095	0.00179605					1095	-0.000177189				1095	0.000429873				1095	-0.00200011
1100	-0.000129661					1100	-0.00102948				1100	-0.00212182				1100	-0.000178542
1105	0.00139					1105	0.0011568				1105	-0.00197336				1105	0.00056306
1110	0.00157417					1110	0.000330466				1110	0.001444				1110	0.00173678
1115	0.000431193					1115	0.000821269				1115	0.00077544				1115	0.00246836
1120	0.000467308					1120	0.00059341				1120	0.00149214				1120	8.87271e-05
1125	0.00255902					1125	-0.00117347				1125	0.00127459				1125	0.00193265
1130	0.00152996					1130	0.000212901				1130	0.000310571				1130	0.00159166
1135	0.00124215					1135	0.00125083				1135	0.00282209				1135	0.00211761
1140	-0.000810213					1140	-0.0192382				1140	0.00415098				1140	-0.0305364
1145	-0.0629925					1145	-0.0472739				1145	0.00147569				1145	-0.149621
1150	-0.236284					1150	0.00768245				1150	-0.0447582				1150	-0.08562
1155	-0.104257					1155	-0.0103742				1155	-0.0131523				1155	-0.015513
1160	-0.0337811					1160	0.00236655				1160	0.00601415				1160	-0.00209708
1165	-0.0202011					1165	-0.00071875				1165	0.000422621				1165	-0.00147466
1170	-0.0133339					1170	-0.000390007				1170	-0.00350436				1170	-0.00082932
1175	-0.00792675					1175	1.13362e-05				1175	-0.00344364				1175	0.000893184
1180	-0.0042524					1180	-0.00084252				1180	-0.000686556				1180	0.00334654
1185	-0.0013292					1185	0.00175383				1185	-0.00193597				1185	-0.00168632
1190	0.000933255					1190	0.000657685				1190	-0.00154688				1190	-0.000814644
1195	0.00158402					1195	0.000141283				1195	-0.00133499				1195	-0.001556
1200	0.00072729					1200	0.000454137				1200	-0.00138842				1200	0.000144992
1205	-0.000272964					1205	-6.30083e-05				1205	-0.000867167				1205	0.000730041
1210	0.000771601					1210	0.00152789				1210	-0.00131373				1210	0.000756377
1215	-0.000416145					1215	0.000748999				1215	-0.00207557				1215	-5.34836e-05
1220	0.000766617					1220	0.000474328				1220	-0.000915538				1220	-0.000986155
1225	-0.00182185					1225	-0.000744466				1225	-0.00294328				1225	0.00187552
1230	-0.001649					1230	-0.000777638				1230	-0.0032586				1230	0.000911859
1235	-0.00162419					1235	-0.000254956				1235	-0.00345304				1235	0.00114152
1240	-0.00306128					1240	-5.91154e-05				1240	-0.00429598				1240	0.000332516
1245	-0.000890644					1245	-0.000674451				1245	-0.00168854				1245	-0.00117363
1250	-0.00268034					1250	0.00193424				1250	-0.00261077				1250	-0.00194553
1255	-0.00195046					1255	0.0031987				1255	-0.00232336				1255	-0.000679765
1260	0.00200979					1260	-0.0233101				1260	-0.00145237				1260	-0.0396032
1265	-0.0719302					1265	-0.0405886				1265	-0.00186889				1265	-0.14475
1270	-0.210044					1270	0.00636184				1270	-0.0444399				1270	-0.0750394
1275	-0.0725852					1275	-0.0138981				1275	-0.00735498				1275	-0.0101588
1280	-0.0185039					1280	0.00484519				1280	0.000573879				1280	-0.00249368
1285	-0.0104844					1285	0.00376397				1285	-0.00191371				1285	-0.0024907
1290	-0.00373317					1290	-0.000359274				1290	-0.00372805				1290	-0.00126603
1295	-0.000993042					1295	0.00126307				1295	-0.00216188				1295	-0.000973356
1300	0.000765412					1300	0.000950436				1300	-0.00225156				1300	-0.000216628
1305	0.00138541					1305	-0.00088342				1305	-0.000280806				1305	-0.00289228
1310	-0.000159604					1310	-0.000929513				1310	-0.00105117				1310	-0.00113608
1315	0.00125103					1315	0.000417362				1315	1.37449e-05				1315	0.000748575
1320	0.00242487					1320	-0.000406494				1320	0.000372414				1320	0.00104113
1325	-0.000943221					1325	-0.000788284				1325	-0.000754403				1325	0.00021747
1330	-0.00259601					1330	8.42468e-05				1330	-0.00200855				1330	0.00120395
1335	-0.000496176					1335	-0.000899326				1335	-0.00379717				1335	0.00110494
1340	0.00295744					1340	-0.00103751				1340	-0.00161226				1340	0.00138853
1345	0.000408627					1345	-0.000257886				1345	-0.000916149				1345	0.000444181
1350	-0.00128912					1350	-0.000332009				1350	0.00329483				1350	-0.00053017
1355	0.000855681					1355	0.000287751				1355	0.00188313				1355	-0.00118452
1360	0.00140712					1360	0.00143156				1360	0.00155128				1360	1.11283e-05
1365	0.00119117					1365	-0.000907655				1365	0.00180373				1365	-0.000593222
1370	0.000395224					1370	-0.000599719				1370	-0.00108478				1370	-0.000100063
1375	-0.000560907					1375	0.000914183				1375	-0.00108139				1375	0.000434594
1380	4.90932e-05					1380	-0.0292333				1380	0.00244428				1380	-0.0390389
1385	-0.0764653					1385	-0.0321234				1385	-0.00070394				1385	-0.138438
1390	-0.194335					1390	0.00800106				1390	-0.0485428				1390	-0.0690511
1395	-0.0699961					1395	-0.00277868				1395	-0.00685623				1395	-0.00893045
1400	-0.028166					1400	-0.00254568				1400	0.00308594				1400	-0.000572604
1405	-0.022006					1405	0.000598217				1405	0.00325746				1405	-0.000632298
1410	-0.0169464					1410	0.000792522				1410	-0.000396664				1410	0.000879016
1415	-0.0111853					1415	0.00107619				1415	-0.00128421				1415	0.00232138
1420	-0.00718521					1420	-0.000669102				1420	-0.00103175				1420	-0.000353386
1425	-0.00402371					1425	0.000691057				1425	-0.000482115				1425	2.73011e-05
1430	-0.000193334					1430	-1.2291e-05				1430	-0.000927963				1430	5.74742e-05
1435	-0.000110418					1435	-0.00080972				1435	-0.000409953				1435	-0.000346948
1440	-9.89874e-05					1440	-0.000746774				1440	-0.000991394				1440	-0.00170566
1445	0.000772683					1445	-0.00104435				1445	-0.00245139				1445	-0.00250874
1450	0.000689955					1450	0.000705363				1450	-0.00263073				1450	-0.00196064
1455	0.000885665					1455	-0.00148682				1455	-0.00248827				1455	0.000463323
1460	0.00220798					1460	-0.000961797				1460	-7.05145e-05				1460	-0.00150186
1465	0.000268611					1465	0.000485781				1465	0.00053196				1465	0.000989316
1470	0.00220082					1470	0.00105114				1470	-0.00110049				1470	0.00107101
1475	0.000531223					1475	0.00151405				1475	-0.00375347				1475	0.00218956
1480	-0.00114137					1480	0.000456888				1480	-0.00398884				1480	0.000928281
1485	-0.00115471					1485	0.000884607				1485	-0.00283393				1485	0.00128437
1490	0.000504402					1490	0.000674791				1490	-0.00137496				1490	0.000970462
1495	0.000685312					1495	-0.000223437				1495	-0.000758356				1495	0.000933057
1500	-0.000105069					1500	-0.0336877				1500	-0.00213745				1500	-0.0492133
1505	-0.0917341					1505	-0.0222296				1505	-0.00764199				1505	-0.12801
1510	-0.176494					1510	0.00150971				1510	-0.0523954				1510	-0.0566695
1515	-0.0556716					1515	-0.00765188				1515	-0.0102291				1515	-0.0035669
1520	-0.0226919					1520	0.00175619				1520	0.000435008				1520	-0.00130926
1525	-0.0159823					1525	-0.00128051				1525	-0.000265851				1525	-0.00197789
1530	-0.0095227					1530	0.00121228				1530	0.000908492				1530	-0.00139888
1535	-0.00477913					1535	0.000144159				1535	0.00206755				1535	0.00064509
1540	-0.000878492					1540	0.000835444				1540	0.003523				1540	-0.000824223
1545	0.000523757					1545	-0.00121817				1545	0.00243716				1545	0.000947745
1550	0.00202979					1550	0.000571828				1550	0.00194249				1550	-0.000153251
1555	-7.42935e-06					1555	-7.28703e-05				1555	0.00229434				1555	0.00014372
1560	-0.000325538					1560	-0.00092013				1560	0.000537731				1560	0.00102542
1565	0.000206354					1565	-0.000314988				1565	-0.00275541				1565	0.00120242
1570	0.00274998					1570	0.0012				1570	-0.00287939				1570	0.00262246
1575	0.000893668					1575	-0.000625428				1575	-0.000678636				1575	0.00291745
1580	0.000548098					1580	1.06241e-05				1580	3.93103e-05				1580	0.00164593
1585	-0.0004774					1585	-3.40575e-05				1585	-0.000707263				1585	0.00186901
1590	0.00224645					1590	0.00162317				1590	-0.000208301				1590	0.00102602
1595	-0.000179813					1595	0.00132702				1595	0.00150845				1595	0.000519508
1600	-0.000338614					1600	0.00010918				1600	0.00164004				1600	0.00126722
1605	-0.000778026					1605	4.7241e-05				1605	0.000539524				1605	-0.00020343
1610	-0.00122134					1610	-0.00069675				1610	-0.000313747				1610	0.000964891
1615	-0.00153593					1615	0.000836767				1615	0.00188967				1615	0.000884372
1620	0.000418158					1620	-0.0395802				1620	0.000981677				1620	-0.0490733
1625	-0.0981376					1625	0.000712227				1625	-0.00557926				1625	-0.119052
1630	-0.1524					1630	0.00302765				1630	-0.0499517				1630	-0.0503475
1635	-0.0412004					1635	-0.00835811				1635	-0.00657543				1635	-0.000916438
1640	-0.010589					1640	0.00204446				1640	0.00268888				1640	-0.00136545
1645	-0.00643011					1645	0.00265737				1645	-0.00165743				1645	-0.000675557
1650	-0.000880204					1650	3.41608e-05				1650	-0.00394489				1650	-0.000299222
1655	-0.000109568					1655	0.000200021				1655	-0.00231287				1655	0.00121998
1660	0.000321024					1660	-0.00177954				1660	-0.00182119				1660	-0.000592996
1665	-3.53653e-05					1665	0.000892157				1665	-0.00173971				1665	-0.00292932
1670	-0.00151108					1670	0.000238017				1670	0.00181192				1670	-0.00129494
1675	-0.00021278					1675	-0.00127068				1675	0.00211387				1675	-0.00155198
1680	0.00139704					1680	-0.000539396				1680	0.00147464				1680	-0.00209083
1685	0.00169665					1685	-0.000334614				1685	-0.000255208				1685	-0.00279928
1690	0.00253586					1690	-0.000547185				1690	0.000348943				1690	-0.00212069
1695	0.00118637					1695	-0.000629756				1695	0.000915548				1695	-0.00185207
1700	0.000682485					1700	6.70764e-05				1700	-0.00134445				1700	-0.00185622
1705	0.000409699					1705	-0.000321787				1705	-0.000707178				1705	-0.00190037
1710	0.000410146					1710	-0.000830347				1710	0.000214727				1710	-0.00051774
1715	0.000660375					1715	0.00015987				1715	0.00150964				1715	0.0014052
1720	0.000224333					1720	0.000991327				1720	0.00213046				1720	-0.000555573
1725	0.00111524					1725	0.000834947				1725	0.00090292				1725	-0.000155709
1730	-0.0015499					1730	0.000780298				1730	0.000795375				1730	0.00110997
1735	5.02281e-05					1735	0.00167066				1735	0.000854199				1735	0.0007666
1740	-0.000118099					1740	-0.0406028				1740	0.000722503				1740	-0.0585889
1745	-0.102789					1745	0.0021235				1745	-0.00879919				1745	-0.111946
1750	-0.130483					1750	0.00386372				1750	-0.0479809				1750	-0.0449579
1755	-0.0247541					1755	-0.0012974				1755	-0.00608597				1755	0.000270733
1760	-0.00251552					1760	0.00075305				1760	-0.000278925				1760	-0.000779156
1765	-0.000676143					1765	0.000519602				1765	0.00044844				1765	-0.0022845
1770	0.00129487					1770	0.000173893				1770	-0.000377133				1770	-0.000590443
1775	-0.000349241					1775	9.8801e-05				1775	0.00199558				1775	0.0007649
1780	-0.00217645					1780	-8.27376e-05				1780	0.00116862				1780	-0.00023746
1785	0.000797504					1785	0.00101369				1785	0.00320371				1785	0.00112025
1790	0.00133764					1790	-0.000103107				1790	0.000326066				1790	-9.26637e-05
1795	0.000159292					1795	0.00101677				1795	0.00155623				1795	0.00128123
1800	0.00105005					1800	0.000458467				1800	0.00325581				1800	0.00105806
1805	0.00016333					1805	0.000457121				1805	0.00111166				1805	0.00102761
1810	0.00244333					1810	-0.00106165				1810	0.000762732				1810	-0.00171027
1815	0.00249685					1815	-0.000470682				1815	0.00117104				1815	-0.000555237
1820	0.0013266					1820	0.00049779				1820	-0.000100564				1820	-0.000717957
1825	0.000130725					1825	0.00108406				1825	-0.00102582				1825	-0.000677604
1830	-0.0012708					1830	0.000647708				1830	0.000153239				1830	-0.000485318
1835	-0.00111681					1835	-0.000304177				1835	0.00109008				1835	-0.000379802
1840	7.33142e-05					1840	-0.000131908				1840	0.000232537				1840	-0.000329934
1845	-0.000522349					1845	0.00159862				1845	6.49921e-05				1845	0.000695959
1850	-0.0016421					1850	0.00117365				1850	0.00145513				1850	0.00108534
1855	0.000158626					1855	0.00160645				1855	-0.000370717				1855	0.000740302
1860	-0.00107125					1860	-0.0446231				1860	0.00152568				1860	-0.0662391
1865	-0.10832					1865	0.00719624				1865	-0.0084311				1865	-0.104238
1870	-0.114601					1870	-0.000371104				1870	-0.0419134				1870	-0.0365616
1875	-0.0211923					1875	-0.00493383				1875	0.000273131				1875	-0.000414702
1880	-0.0049634					1880	0.00287734				1880	0.00344219				1880	-0.00137167
1885	-0.000639964					1885	0.000914351				1885	8.888e-05				1885	-0.000539685
1890	0.000691307					1890	0.00113691				1890	0.000639933				1890	-0.000240847
1895	-0.00178984					1895	0.000789369				1895	0.000292928				1895	0.00144618
1900	-0.00105047					1900	-0.000916491				1900	0.000639869				1900	0.000238275
1905	-0.000307292					1905	-0.000420277				1905	0.00110187				1905	0.000795603
1910	-0.000536402					1910	0.00149229				1910	0.00353084				1910	0.00146293
1915	-0.00155699					1915	0.000196977				1915	0.00289291				1915	0.000636946
1920	-0.00276622					1920	-0.00165934				1920	0.00189206				1920	-0.000266718
1925	-0.000476539					1925	0.00061745				1925	0.00419545				1925	-0.000638342
1930	0.000369047					1930	-0.00128489				1930	0.00366274				1930	-0.000586357
1935	0.00134545					1935	-0.000609386				1935	-0.000672387				1935	0.000349641
1940	0.00124215					1940	0.000418307				1940	-0.000628094				1940	-0.00171639
1945	0.00138016					1945	0.000226328				1945	0.00246395				1945	-0.00193832
1950	0.000819777					1950	0.000319046				1950	0.000883698				1950	-0.000531679
1955	0.0010094					1955	0.000509887				1955	0.00244365				1955	7.21675e-05
1960	0.000283881					1960	-7.56207e-05				1960	0.00095035				1960	-0.000975161
1965	6.51808e-05					1965	0.000428855				1965	0.00164947				1965	-0.000942309
1970	0.000303793					1970	0.00118195				1970	0.00217309				1970	-0.000595667
1975	0.00385982					1975	-9.96388e-05				1975	-0.00210888				1975	0.000617395
1980	0.000482897					1980	-0.0499394				1980	-0.000638549				1980	-0.0713416
1985	-0.116498					1985	0.00123336				1985	-0.0112923				1985	-0.0975386
1990	-0.101479					1990	-0.00182198				1990	-0.0423137				1990	-0.0340853
1995	-0.0206194					1995	-0.00405367				1995	-0.00140143				1995	-0.000194515
2000	-0.00782692					2000	0.00211162				2000	0.00323985				2000	-0.000543522
2005	-0.000838191					2005	0.000627291				2005	-0.000541717				2005	-0.00215582
2010	0.0026723					2010	-0.000682358				2010	0.000917345				2010	-0.000582152
2015	0.000113187					2015	0.000968928				2015	0.00209782				2015	-0.000613147
2020	0.000914076					2020	-0.000420409				2020	0.000130274				2020	-0.000990428
2025	4.49663e-05					2025	0.000756018				2025	-0.00150442				2025	-0.00109903
2030	9.68317e-05					2030	-0.000357555				2030	-0.00128074				2030	-0.00105825
2035	-0.00109152					2035	0.000460922				2035	-0.003289				2035	-0.00107439
2040	0.000417843					2040	0.000372207				2040	-0.000293564				2040	0.000778448
2045	0.00133759					2045	0.000623545				2045	-0.00113857				2045	0.00176396
2050	0.00178624					2050	0.000210551				2050	-0.00035897				2050	0.00235862
2055	0.000787388					2055	-0.000382365				2055	-0.000937649				2055	0.000792993
2060	0.00133893					2060	0.000450986				2060	-0.000543015				2060	-0.000528686
2065	0.00195389					2065	9.68969e-05				2065	-0.00113535				2065	-0.00110104
2070	-0.000747541					2070	-0.000672002				2070	-0.00270603				2070	-0.000510044
2075	0.00220951					2075	0.00025124				2075	-0.000542402				2075	-0.000979945
2080	0.00168242					2080	0.00180767				2080	-0.000987133				2080	0.0016137
2085	0.00101767					2085	-0.000680313				2085	-0.00288924				2085	0.00187033
2090	0.000397867					2090	-0.000526456				2090	-0.0029583				2090	0.0018377
2095	0.00289073					2095	0.000881729				2095	-0.00271589				2095	8.94442e-06
2100	-0.00206031					2100	-0.0537996				2100	-0.00112994				2100	-0.0682595
2105	-0.113763					2105	0.00114916				2105	-0.0174322				2105	-0.0864484
2110	-0.0790841					2110	-0.0104396				2110	-0.0403423				2110	-0.0293154
2115	-0.0111347					2115	-0.00190534				2115	-0.00262918				2115	0.00118782
2120	-0.0020627					2120	-0.000199459				2120	-0.000957728				2120	-0.00186821
2125	-0.00139219					2125	-0.000796235				2125	-0.00211914				2125	-0.000484237
2130	-0.00015109					2130	-0.000132228				2130	-0.000452936				2130	-0.00210873
2135	-9.43775e-06					2135	-0.000217434				2135	-0.00184387				2135	-0.000960711
2140	-0.00178118					2140	-0.00158696				2140	-0.00187328				2140	-0.00120322
2145	-0.000371184					2145	-0.00136057				2145	0.000318972				2145	0.000826233
2150	0.000578816					2150	-0.000692612				2150	0.000696338				2150	-0.00105537
2155	2.88155e-05					2155	0.000607105				2155	0.00203246				2155	-0.0014938
2160	0.00106882					2160	0.000667036				2160	0.00293662				2160	0.000548577
2165	-7.1687e-05					2165	0.000641477				2165	-0.000844298				2165	-0.000468875
2170	0.00048844					2170	0.00112048				2170	-0.00204935				2170	0.00101427
2175	0.000323031					2175	0.00192579				2175	0.00202632				2175	0.00163758
2180	-0.00133646					2180	-0.000540351				2180	0.00203249				2180	-0.000208696
2185	0.000210497					2185	0.000184452				2185	-0.0018632				2185	-0.000734821
2190	-0.00162292					2190	0.000856633				2190	-0.00284244				2190	-0.000754585
2195	-0.000237283					2195	-0.000669201				2195	-0.0014129				2195	-0.000355425
2200	0.000564147					2200	-0.00169675				2200	-0.00104459				2200	0.000172537
2205	0.000591096					2205	-0.00197527				2205	0.00128679				2205	0.00107651
2210	0.00159056					2210	-0.000907027				2210	0.00183046				2210	0.00331155
2215	0.0047307					2215	-0.000800095				2215	0.000870456				2215	0.000775028
2220	-0.000157034					2220	-0.0500349				2220	0.000764676				2220	-0.0731827
2225	-0.112504					2225	0.0116222				2225	-0.0160512				2225	-0.0784253
2230	-0.0709652					2230	-0.00540461				2230	-0.037259				2230	-0.0234894
2235	-0.00460556					2235	-0.00360862				2235	-0.00243086				2235	-0.000489379
2240	0.00013444					2240	0.00202272				2240	-0.00129216				2240	-0.00372253
2245	-0.000361972					2245	-0.000608548				2245	-0.00435768				2245	-0.00245906
2250	-0.000877394					2250	0.00121831				2250	-0.00116446				2250	0.00023303
2255	-0.0018424					2255	-9.12091e-05				2255	0.000630437				2255	0.000590549
2260	-0.000602669					2260	0.000571571				2260	0.00105328				2260	-0.000537779
2265	0.00135985					2265	-0.000264351				2265	-0.0014149				2265	-0.000358275
2270	0.0012671					2270	0.00153054				2270	-0.0031403				2270	0.00197907
2275	-2.35424e-05					2275	-0.000471658				2275	-0.000977511				2275	0.00125056
2280	0.00173032					2280	0.00215753				2280	0.00114038				2280	-0.00117591
2285	0.00151569					2285	0.000799227				2285	0.00239059				2285	-0.0017091
2290	0.00036525					2290	0.000264254				2290	-0.000265917				2290	-0.00156499
2295	1.57897e-05					2295	0.000691042				2295	0.000762077				2295	-0.00170075
2300	0.000959999					2300	0.0011528				2300	0.000442196				2300	-0.00137651
2305	0.00026471					2305	0.000346918				2305	0.0018775				2305	-0.00161226
2310	-0.000717915					2310	-0.00062595				2310	0.00116591				2310	0.00134198
2315	-0.000380387					2315	-0.00158488				2315	0.000887447				2315	0.000546246
2320	0.00032844					2320	0.00011801				2320	0.00232451				2320	-0.000449492
2325	-0.00205272					2325	-0.000474871				2325	0.00131394				2325	-0.00128523
2330	-0.000553697					2330	0.00108528				2330	0.00324855				2330	-0.00308096
2335	0.00206533					2335	-0.00118189				2335	0.00415714
						2340	-0.0501036				2340	0.00219859
						2345	0.0115921				2345	-0.0164034
						2350	-0.00358329				2350	-0.0298229
						2355	-0.00207996				2355	0.00452248
						2360	-0.00150608				2360	0.00413249
						2365	0.000610778				2365	-0.00130498
						2370	0.000352009				2370	-0.00168567
						2375	-0.000492895				2375	-0.000593644
						2380	0.000517223				2380	-0.000557345
						2385	-0.000910099				2385	0.00190419
						2390	0.00126914				2390	0.00150825
						2395	0.000361667				2395	0.00226853
						2400	-0.000171758				2400	0.00337211
						2405	0.00100098				2405	0.00450939
						2410	0.000365832				2410	-0.000501529
						2415	-0.0011116				2415	-0.00101345
						2420	-0.00110996				2420	-0.00205099
						2425	0.000625149				2425	0.00023543
						2430	-0.00155255				2430	-0.000431357
						2435	-0.00083802				2435	0.000877174
						2440	0.000660695				2440	0.00122059
						2445	0.000864262				2445	-0.00106526
						2450	-0.000171598				2450	-0.00232965
											2455	-0.00335381
