# Supplementary material for: Structural insights into sodium transport by the oxaloacetate decarboxylase sodium pump
Source: eLife. 2020 May 27;9:e53853. doi: 10.7554/eLife.53853 (PMC7274780; doi:10.7554/eLife.53853)
Supplement: Figure 4—source data 2. [file elife-53853-fig4-data2.xlsx]

## Sheet: Sheet1
	Raw rate (1/min)			Specific activity (1/min)
WT	experiment 1	experiment 2	experiment 3	experiment 1	experiment 2	experiment 3	Average	Standard deviation
[Na] (mM)
0	0.073	0.065	0.068	97.2685	86.6089	90.6063	91.4946	4.39684
78	0.098	0.099	0.096	130.58	131.912	127.915	130.135	1.66185
156	0.133	0.131	0.128	177.215	174.55	170.553	174.106	2.73791
312	0.163	0.173	0.174	217.189	230.513	231.845	226.516	6.61766
625	0.238	0.241	0.247	317.122	321.119	329.114	322.452	4.98555
1250	0.286	0.276	0.273	381.079	367.755	363.757	370.864	7.40543
2500	0.333	0.323	0.347	443.704	430.38	462.358	445.481	13.1155
5000	0.377	0.363	0.374	502.332	483.678	498.334	494.781	8.01931
10000	0.393	0.398	0.385	523.651	530.313	512.991	522.318	7.13408
20000	0.393	0.406	0.409	523.651	540.973	544.97	536.531	9.25279
Ctrl
0	0.0056	0.0053	0.0051	7.46169	7.06196	6.79547	7.10637	0.273791
156	0.0053	0.0056	0.0055	7.06196	7.46169	7.32845	7.28403	0.166185
312	0.0063	0.0063	0.0062	8.3944	8.3944	8.26116	8.34999	0.0628121
625	0.0083	0.008	0.008	11.0593	10.6596	10.6596	10.7928	0.188436
1250	0.0108	0.01	0.0097	14.3904	13.3245	12.9247	13.5465	0.618627
2500	0.0123	0.0143	0.012	16.3891	19.054	15.9893	17.1441	1.36028
5000	0.0148	0.0145	0.0138	19.7202	19.3205	18.3877	19.1428	0.558286
10000	0.0116	0.012	0.0136	15.4564	15.9893	18.1213	16.5223	1.15136
20000	0.0051	0.0065	0.0081	6.79547	8.66089	10.7928	8.74972	1.63311
D203A
0	0.0128	0.0119	0.0073	17.0553	15.8561	9.72685	14.2127	3.20957
156	0.0192	0.0192	0.0103	25.5829	25.5829	13.7242	21.63	5.59027
312	0.0219	0.0205	0.0105	29.1805	27.3151	13.9907	23.4954	6.7639
625	0.0274	0.0264	0.0135	36.509	35.1765	17.988	29.8912	8.43438
1250	0.0435	0.0276	0.0145	57.9614	36.7755	19.3205	38.0191	15.7996
2500	0.0504	0.033	0.0162	67.1552	43.9707	21.5856	44.2372	18.6047
5000	0.056	0.0338	0.0191	74.6169	45.0366	25.4497	48.3678	20.2102
10000	0.065	0.0405	0.0182	86.6089	53.964	24.2505	54.9412	25.4671
20000	0.071	0.0418	0.0148	94.6036	55.6962	19.7202	56.6733	30.5788
40000	0.049	0.04	0.0232	65.2898	53.2978	30.9127	49.8334	14.2466
S382A
78	0.0019	0.0026	0.0025	2.53165	3.46436	3.33111	3.10904	0.411886
156	0.0015	0.0018	0.0029	1.99867	2.3984	3.86409	2.75372	0.801931
312	0.0023	0.0014	0.0019	3.06462	1.86542	2.53165	2.48723	0.490578
625	0.0029	0.0027	0.0019	3.86409	3.5976	2.53165	3.33111	0.575682
1250	0.0031	0.0022	0.0024	4.13058	2.93138	3.19787	3.41994	0.514139
2500	0.0032	0.0033	0.0027	4.26382	4.39707	3.5976	4.08616	0.349723
5000	0.0035	0.0032	0.0031	4.66356	4.26382	4.13058	4.35265	0.226472
10000	0.0036	0.0048	0.0046	4.7968	6.39574	6.12925	5.77393	0.699446
20000	0.0007	0.0006	0.005	0.932712	0.799467	6.66223	2.79813	2.73287
N412A
0	0.0192	0.0197	0.0191	25.5829	26.2492	25.4497	25.7606	0.349723
156	0.0316	0.0318	0.032	42.1053	42.3718	42.6382	42.3718	0.217587
312	0.036	0.039	0.0355	47.968	51.9654	47.3018	49.0784	2.05943
625	0.0417	0.0418	0.0415	55.563	55.6962	55.2965	55.5185	0.166185
1250	0.0402	0.0447	0.045	53.5643	59.5603	59.96	57.6949	2.92532
2500	0.043	0.045	0.042	57.2951	59.96	55.9627	57.7393	1.66185
5000	0.031	0.037	0.038	41.3058	49.3005	50.6329	47.0797	4.11886
10000	0.0234	0.024	0.0239	31.1792	31.9787	31.8454	31.6678	0.349723
20000	0.0134	0.016	0.019	17.8548	21.3191	25.3165	21.4968	3.04881
