# Supplementary material for: Structural insights into sodium transport by the oxaloacetate decarboxylase sodium pump
Source: eLife. 2020 May 27;9:e53853. doi: 10.7554/eLife.53853 (PMC7274780; doi:10.7554/eLife.53853)
Supplement: Figure 5—source data 1. [file elife-53853-fig5-data1.xlsx]

## Sheet: Sheet1
	Raw rate (1/min)			Specific activity (1/min)
WT	experiment 1	experiment 2	experiment 3	experiment 1	experiment 2	experiment 3	Average	Standard deviation
[Na] (mM)
0	0.073	0.065	0.068	97.2685	86.6089	90.6063	91.4946	4.39684
78	0.098	0.099	0.096	130.58	131.912	127.915	130.135	1.66185
156	0.133	0.131	0.128	177.215	174.55	170.553	174.106	2.73791
312	0.163	0.173	0.174	217.189	230.513	231.845	226.516	6.61766
625	0.238	0.241	0.247	317.122	321.119	329.114	322.452	4.98555
1250	0.286	0.276	0.273	381.079	367.755	363.757	370.864	7.40543
2500	0.333	0.323	0.347	443.704	430.38	462.358	445.481	13.1155
5000	0.377	0.363	0.374	502.332	483.678	498.334	494.781	8.01931
10000	0.393	0.398	0.385	523.651	530.313	512.991	522.318	7.13408
20000	0.393	0.406	0.409	523.651	540.973	544.97	536.531	9.25279
E40A
0	0.0073	0.007	0.0067	9.72685	9.32712	8.92738	9.32712	0.326381
156	0.0095	0.007	0.0096	12.6582	9.32712	12.7915	11.5923	1.60263
312	0.0121	0.0137	0.0096	16.1226	18.2545	12.7915	15.7229	2.24811
625	0.0113	0.0112	0.0121	15.0566	14.9234	16.1226	15.3675	0.536666
1250	0.0139	0.0087	0.0155	18.521	11.5923	20.6529	16.9221	3.86792
2500	0.0153	0.0128	0.0157	20.3864	17.0553	20.9194	19.4537	1.70983
5000	0.0164	0.0082	0.0168	21.8521	10.926	22.3851	18.3877	5.2807
10000	0.0121	0.0163	0.0146	16.1226	21.7189	19.4537	19.0984	2.29844
20000	0.0133	0.0187	0.0119	17.7215	24.9167	15.8561	19.4981	3.90649
R258A
0	0.0398	0.0487	0.0404	53.0313	64.8901	53.8308	57.2507	5.41169
156	0.0663	0.0696	0.0709	88.3411	92.7382	94.4704	91.8499	2.57989
312	0.1097	0.1023	0.102	146.169	136.309	135.909	139.463	4.74512
625	0.1484	0.148	0.1522	197.735	197.202	202.798	199.245	2.52189
1250	0.2053	0.2052	0.2007	273.551	273.418	267.422	271.463	2.85847
2500	0.2558	0.2512	0.258	340.839	334.71	343.771	339.773	3.775
5000	0.2705	0.2862	0.2888	360.426	381.346	384.81	375.527	10.7713
10000	0.3223	0.327	0.319	429.447	435.71	425.05	430.069	4.3739
20000	0.3526	0.346	0.3313	469.82	461.026	441.439	457.428	11.8625
40000	0.3616	0.3454	0.3426	481.812	460.227	456.496	466.178	11.1594
R304A
0	0.0207	0.02	0.018	27.5816	26.6489	23.984	26.0715	1.52441
156	0.0334	0.036	0.0349	44.5037	47.968	46.5023	46.3247	1.41989
312	0.056	0.05	0.053	74.6169	66.6223	70.6196	70.6196	3.26381
625	0.0897	0.0896	0.0876	119.52	119.387	116.722	118.543	1.2888
1250	0.143	0.144	0.152	190.54	191.872	202.532	194.981	5.36666
2500	0.21	0.207	0.2187	279.813	275.816	291.406	282.345	6.6114
5000	0.2445	0.241	0.2556	325.783	321.119	340.573	329.158	8.29286
10000	0.309	0.307	0.303	411.726	409.061	403.731	408.172	3.3237
20000	0.334	0.345	0.3358	445.037	459.694	447.435	450.722	6.41913
40000	0.365	0.374	0.365	486.342	498.334	486.342	490.34	5.65309
N311A
0	0.0155	0.0165	0.0142	20.6529	21.9853	18.9207	20.5197	1.25467
156	0.0258	0.0256	0.0245	34.3771	34.1106	32.6449	33.7109	0.761556
312	0.0385	0.0364	0.0352	51.2991	48.501	46.9021	48.9007	1.81721
625	0.0545	0.0543	0.0536	72.6183	72.3518	71.4191	72.1297	0.514139
1250	0.0838	0.0831	0.0834	111.659	110.726	111.126	111.17	0.382071
2500	0.1228	0.1185	0.119	163.624	157.895	158.561	160.027	2.55839
5000	0.1507	0.1505	0.147	200.799	200.533	195.869	199.067	2.26385
10000	0.1654	0.1697	0.174	220.386	226.116	231.845	226.116	4.67813
20000	0.1922	0.2008	0.193	256.096	267.555	257.162	260.271	5.16894
40000	0.1946	0.1964	0.2063	259.294	261.692	274.883	265.29	6.854
