# Supplementary material for: Structural insights into sodium transport by the oxaloacetate decarboxylase sodium pump
Source: eLife. 2020 May 27;9:e53853. doi: 10.7554/eLife.53853 (PMC7274780; doi:10.7554/eLife.53853)
Supplement: Figure 5—source data 2. [file elife-53853-fig5-data2.xlsx]

## Sheet: Sheet1
WT						E40A						R258A						R304A						N311A
Time (S)	(mCal/S)	Molar ratio	Cal/mole of injectant	fit		Time (S)	(mCal/S)	Molar ratio	Cal/mole of injectant	fit		Time (S)	(mCal/S)	Molar ratio	Cal/mole of injectant	fit		Time (S)	(mCal/S)	Molar ratio	Cal/mole of injectant	fit		Time (S)	(mCal/S)	Molar ratio	Cal/mole of injectant	fit
5	0.00166382	0.821422		-123.381		5	0.000850572	﻿0.821422		-65.5093		5	0.000400567	0.821422		-107.626		5	-0.00122467	0.821422		-89.5017		5	0.00196552	0.821422		-81.0936
10	0.0011928	4.95277	-95.6864	-106.778		10	0.00125942	4.95277	-50.8162	-61.19		10	-0.000124288	4.95277	-80.8849	-94.4357		10	6.51558e-05	4.95277	-69.3879	-80.494		10	0.00151469	4.95277	-61.2044	-73.0641
15	-0.000608217	9.12453	-101.149	-84.9087		15	0.000316068	9.12453	-65.1933	-54.7651		15	-0.000449144	9.12453	-90.4025	-76.692		15	-0.000755018	9.12453	-82.8118	-67.8994		15	-0.00185613	9.12453	-73.9829	-61.8049
20	0.00180064	13.3367	-73.2869	-68.8096		20	0.000319684	13.3367	-53.2684	-49.2324		20	0.001686	13.3367	-70.189	-63.2724		20	0.00204542	13.3367	-61.8413	-57.8894		20	-0.00268623	13.3367	-59.1798	-52.823
25	0.00221824	17.5893	-54.4954	-56.6812		25	0.00214235	17.5893	-46.1304	-44.4389		25	0.00182115	17.5893	-55.3931	-52.9223		25	0.00187112	17.5893	-50.5859	-49.8238		25	-0.00179109	17.5893	-48.7455	-45.5618
30	0.000955692	21.8822	-46.21	-47.3541		30	-0.000685495	21.8822	-39.9137	-40.2624		30	0.00120605	21.8822	-47.322	-44.7984		30	-0.000166668	21.8822	-41.0655	-43.2438		30	-0.000414527	21.8822	-36.4209	-39.6205
35	-0.00255082	26.2156	-38.7808	-40.0492		35	-0.00257494	26.2156	-35.118	-36.6043		35	0.00136843	26.2156	-37.367	-38.3216		35	0.000585663	26.2156	-34.5119	-37.8153		35	-0.00137497	26.2156	-34.1785	-34.706
40	-0.00100967	30.5894	-30.7178	-34.2351		40	-0.000995226	30.5894	-33.7592	-33.3846		40	-0.000107232	30.5894	-30.6961	-33.0854		40	0.00236334	30.5894	-31.2145	-33.2911		40	0.000449676	30.5894	-30.0066	-30.6005
45	0.000704284	35.0036	-27.7773	-29.5408		45	0.0017935	35.0036	-28.0112	-30.5379		45	0.00123344	35.0036	-29.0151	-28.799		45	0.000865322	35.0036	-27.6599	-29.4856		45	-0.000864083	35.0036	-25.8361	-27.1398
50	0.00209928	39.4582	-24.1825	-25.7019		50	0.000250566	39.4582	-26.9388	-28.0102		50	0.00111093	39.4582	-25.0943	-25.2508		50	0.00224867	39.4582	-25.0796	-26.2579		50	9.47839e-05	39.4582	-23.3576	-24.1989
55	-1.18607e-05	43.9531	-19.4024	-22.5267		55	0.000346853	43.9531	-27.4521	-25.7568		55	-0.00113669	43.9531	-20.4134	-22.284		55	0.000299452	43.9531	-22.2369	-23.4992		55	0.000745514	43.9531	-19.2999	-21.6809
60	-0.000676023	48.4885	-21.0974	-19.8733		60	-0.000388639	48.4885	-21.6619	-23.7405		60	-0.00161844	48.4885	-15.8624	-19.7806		60	0.00127044	48.4885	-19.7283	-21.1248		60	-0.000652419	48.4885	-17.6871	-19.5101
65	-0.000666658	53.0643	-18.5178	-17.6354		65	-0.000735466	53.0643	-20.0692	-21.93		65	-0.00180501	53.0643	-15.0051	-17.6507		65	0.00252015	53.0643	-17.7804	-19.068		65	3.53479e-05	53.0643	-14.4976	-17.627
70	-0.000444879	57.6805	-15.269	-15.7321		70	0.000756672	57.6805	-18.8451	-20.2989		70	-7.15803e-05	57.6805	-13.0412	-15.8249		70	-0.000276448	57.6805	-18.4746	-17.2757		70	0.000281208	57.6805	-14.5466	-15.9839
75	-0.000664752	62.3372	-12.7642	-14.101		75	0.000290992	62.3372	-18.1578	-18.8248		75	0.00249185	62.3372	-12.3022	-14.249		75	0.00181256	62.3372	-16.5465	-15.7053		75	1.14565e-05	62.3372	-14.415	-14.5424
80	-0.00113505	67.0342	-12.7121	-12.6935		80	0.00144124	67.0342	-17.7733	-17.4887		80	0.00301054	67.0342	-11.1753	-12.8802		80	0.00092961	67.0342	-15.9326	-14.3224		80	0.000699342	67.0342	-13.846	-13.2716
85	-0.00239442	71.7716	-11.4866	-11.471		85	0.00100434	71.7716	-18.7452	-16.2743		85	-0.00180984	71.7716	-7.66188	-11.6844		85	0.000358121	71.7716	-12.7719	-13.0989		85	-0.000182891	71.7716	-12.2572	-12.1461
90	-0.000479215	76.5494	-10.3475	-10.4031		90	0.00054187	76.5494	-14.9258	-15.1677		90	-0.00188881	76.5494	-8.19637	-10.634		90	0.00146239	76.5494	-13.1449	-12.0116		90	2.20176e-06	76.5494	-11.2435	-11.1449
95	-0.00155883	81.3676	-8.87454	-9.46508		95	-0.000229949	81.3676	-14.151	-14.1566		95	-0.00210574	81.3676	-9.4012	-9.70675		95	0.0017319	81.3676	-11.5031	-11.0414		95	6.04647e-05	81.3676	-10.494	-10.2507
100	-0.0013443					100	0.000300487					100	-0.00165661	86.2263	-8.53946	-8.88443		100	0.000434226					100	-0.000154002	86.2263	-10.1497	-9.449
105	-0.00106827					105	-0.00220545					105	-0.00177404					105	0.000286707					105	0.000655005
110	-0.00266011					110	-0.000777252					110	-0.00125747					110	0.00117001					110	0.000669496
115	-0.001035					115	0.00379438					115	-0.000466102					115	0.001821					115	0.000318255
120	0.000106552					120	0.00125581					120	0.000469107					120	-0.00435151					120	0.000606451
125	0.00145706					125	-0.000545432					125	-0.00167996					125	-0.00389555					125	-0.000812308
130	0.000937626					130	-0.00116459					130	-0.00238735					130	-9.01254e-05					130	-0.000822732
135	-8.12302e-05					135	-0.00310019					135	-0.000769184					135	0.00124288					135	-0.000609258
140	-0.000777426					140	-0.00262697					140	-0.00143681					140	-0.00251319					140	-0.000537809
145	-0.00062679					145	7.62734e-05					145	-0.00319786					145	-0.000600535					145	-0.00138185
150	-0.00191137					150	9.32275e-07					150	0.00182569					150	-0.00100645					150	-0.00121528
155	-0.00116252					155	-0.000290777					155	0.00139635					155	-0.00246045					155	-0.00205528
160	0.000686284					160	0.000551211					160	0.000168145					160	0.000197583					160	-0.00208693
165	0.00218552					165	-0.0020673					165	0.00125605					165	0.000894414					165	-0.000457181
170	-0.000500548					170	-0.00120963					170	-0.00096913					170	0.00249404					170	0.000504712
175	0.000438562					175	-0.00142248					175	-0.000315032					175	0.000488821					175	-0.000498266
180	0.00155835					180	-0.000868437					180	-0.000723706					180	0.000597418					180	-0.0022087
185	-0.0255833					185	-0.0270168					185	-0.000694753					185	-0.0764829					185	-0.000179444
190	-0.532165					190	-0.366033					190	-0.093406					190	-0.507048					190	-0.12116
195	-0.596352					195	-0.330068					195	-0.591773					195	-0.367236					195	-0.630751
200	-0.291879					200	-0.125014					200	-0.421069					200	-0.170868					200	-0.303508
205	-0.146072					205	-0.0580399					205	-0.200312					205	-0.0952075					205	-0.084948
210	-0.0917555					210	-0.0379828					210	-0.122012					210	-0.0541683					210	-0.0376977
215	-0.0597834					215	-0.0223301					215	-0.0744513					215	-0.0334619					215	-0.0185956
220	-0.041061					220	-0.0130567					220	-0.0445934					220	-0.0252755					220	-0.00869581
225	-0.031422					225	-0.00818091					225	-0.0285651					225	-0.0171354					225	-0.00562841
230	-0.0229323					230	-0.00512558					230	-0.0197834					230	-0.0120361					230	-0.00337122
235	-0.0183251					235	-0.00434584					235	-0.0115951					235	-0.00895702					235	-0.00271776
240	-0.0147865					240	-0.00139118					240	-0.0067817					240	-0.00853837					240	-0.000615487
245	-0.0128297					245	-0.00219533					245	-0.00287984					245	-0.00561354					245	-0.000154318
250	-0.00956053					250	-0.000630558					250	-0.00330917					250	-0.00507354					250	-0.000817858
255	-0.00975253					255	-0.00400865					255	0.000166807					255	-0.00300096					255	-0.000848981
260	-0.00637127					260	-0.000393774					260	0.000590237					260	-0.000938973					260	0.000911624
265	-0.00421068					265	-0.000380571					265	0.00222367					265	-0.00129234					265	-0.00135257
270	-0.000915671					270	-0.00125738					270	0.0033071					270	0.000297167					270	-0.00102257
275	-0.00101105					275	-0.00241648					275	0.00167675					275	-0.000228294					275	-0.000175763
280	0.000159328					280	-0.00131272					280	-0.00120042					280	-0.000131271					280	-0.000526259
285	0.000585486					285	-0.00121729					285	-0.00371467					285	-0.001031					285	0.000397288
290	-0.000610041					290	-0.000859824					290	-0.00175982					290	-0.000360114					290	0.00147729
295	-0.000205999					295	-0.000448834					295	-0.000639272					295	-0.000654174					295	-0.00175271
300	0.000163747					300	0.000643847					300	-0.00103222					300	-0.00160701					300	-0.000142712
305	-0.0857965					305	-0.0787995					305	-0.00216286					305	-0.280858					305	0.000739548
310	-0.657937					310	-0.47904					310	-0.15222					310	-0.584279					310	-0.306035
315	-0.568997					315	-0.367858					315	-0.656479					315	-0.319415					315	-0.713248
320	-0.269857					320	-0.14499					320	-0.438571					320	-0.162662					320	-0.262244
325	-0.144817					325	-0.0728697					325	-0.212947					325	-0.0971803					325	-0.0870755
330	-0.0926569					330	-0.0506148					330	-0.13026					330	-0.0611805					330	-0.0438042
335	-0.0615994					335	-0.0353852					335	-0.0785738					335	-0.0406794					335	-0.0230781
340	-0.0418699					340	-0.0254329					340	-0.0496573					340	-0.0289309					340	-0.0136279
345	-0.0276367					345	-0.017263					345	-0.0290578					345	-0.0197481					345	-0.00847806
350	-0.0212167					350	-0.0120999					350	-0.017183					350	-0.0153687					350	-0.00718756
355	-0.0159604					355	-0.00929166					355	-0.0103382					355	-0.013113					355	-0.00313707
360	-0.0138608					360	-0.00415671					360	-0.00667344					360	-0.00865055					360	-0.00186657
365	-0.00891939					365	-0.00366475					365	-0.00386848					365	-0.00632167					365	-0.00126651
370	-0.00597117					370	-0.0013654					370	0.000159791					370	-0.00579267					370	-0.000946263
375	-0.00506175					375	0.00146763					375	0.00197361					375	-0.00429943					375	-0.000506015
380	-0.00241389					380	-9.23661e-05					380	-0.000501446					380	-0.00347993					380	-0.00178577
385	-0.00250631					385	-0.000900161					385	-0.0023465					385	-0.00276028					385	-0.00296423
390	0.00171509					390	-2.04869e-05					390	-0.0033719					390	0.00100972					390	-0.000553732
395	0.00155648					395	-0.000216263					395	-0.00392786					395	0.00120937					395	-1.02575e-05
400	0.00114754					400	-1.38732e-06					400	-0.00453733					400	-3.31113e-05					400	-0.0016215
405	6.84965e-05					405	0.000611283					405	-0.00443562					405	0.000818898					405	-0.00148249
410	-0.0019735					410	0.00094173					410	-0.000764813					410	0.00175159					410	-0.0015519
415	-0.000796356					415	-5.89725e-05					415	-0.00196871					415	0.000104553					415	-0.00240131
420	0.00111692					420	0.000985616					420	0.000862024					420	-0.00833554					420	0.00454972
425	-0.0576916					425	-0.148977					425	0.00403029					425	-0.302184					425	0.000112527
430	-0.502755					430	-0.433028					430	-0.117502					430	-0.431478					430	-0.307213
435	-0.425511					435	-0.249907					435	-0.524812					435	-0.207992					435	-0.550529
440	-0.190672					440	-0.0924964					440	-0.334041					440	-0.106766					440	-0.176205
445	-0.101027					445	-0.0496754					445	-0.15567					445	-0.0646204					445	-0.0652613
450	-0.0645873					450	-0.0342956					450	-0.096163					450	-0.0409425					450	-0.0331674
455	-0.0407436					455	-0.0231066					455	-0.0621964					455	-0.0285962					455	-0.0173907
460	-0.0269453					460	-0.0162704					460	-0.0376599					460	-0.0194951					460	-0.0102029
465	-0.0186444					465	-0.00853656					465	-0.0233634					465	-0.0132864					465	-0.00621285
470	-0.0101188					470	-0.00631516					470	-0.0144568					470	-0.0106006					470	-0.00609276
475	-0.00552259					475	-5.94719e-05					475	-0.00821029					475	-0.00659766					475	-0.00357325
480	-0.0040914					480	-0.000571728					480	-0.00531027					480	-0.00301572					480	-0.00507551
485	-0.00271163					485	2.16441e-05					485	-0.0034996					485	-0.00114705					485	-0.00161927
490	-0.00367643					490	-0.000880947					490	-0.00137473					490	-0.000227506					490	-0.00402504
495	-0.00125493					495	0.000513277					495	-0.00437128					495	0.000978536					495	0.000212894
500	-0.00142712					500	-0.000416464					500	-0.00349052					500	0.00158715					500	-0.000693317
505	-0.00243524					505	-0.000160634					505	-0.00201676					505	0.000642184					505	0.00075844
510	-0.00183514					510	-0.00215464					510	9.37858e-05					510	0.000741335					510	0.00102126
515	-0.00104201					515	-0.00177349					515	-0.00299441					515	0.000986968					515	0.000833596
520	-0.00125811					520	0.000489082					520	-0.00488379					520	0.00172811					520	0.000321084
525	-0.000340841					525	-0.00112799					525	-0.00359591					525	0.000695953					525	0.00109984
530	9.96154e-05					530	-0.00149914					530	-0.00199801					530	0.000200375					530	-0.000363763
535	0.00075447					535	-0.00113556					535	-0.00119396					535	0.00140174					535	0.00132723
540	0.0018843					540	0.00066161					540	-0.000216765					540	-0.0128696					540	7.04047e-05
545	-0.0515308					545	-0.157304					545	0.000203903					545	-0.278704					545	-0.00838568
550	-0.4204					550	-0.377675					550	-0.107596					550	-0.339801					550	-0.303299
555	-0.320283					555	-0.202579					555	-0.43037					555	-0.15379					555	-0.430942
560	-0.133829					560	-0.0668647					560	-0.254568					560	-0.0761914					560	-0.121459
565	-0.0709782					565	-0.0381442					565	-0.1135					565	-0.0464854					565	-0.048468
570	-0.0444892					570	-0.0265847					570	-0.0694331					570	-0.0298207					570	-0.0263467
575	-0.0261933					575	-0.0165568					575	-0.0423466					575	-0.0206687					575	-0.0163755
580	-0.0170179					580	-0.0134395					580	-0.02719					580	-0.0175503					580	-0.00931891
585	-0.0101746					585	-0.00846253					585	-0.0170435					585	-0.0120876					585	-0.00603791
590	-0.00387139					590	-0.00449501					590	-0.010277					590	-0.00793668					590	-0.00662654
595	-0.0010788					595	-0.00286677					595	-0.00426045					595	-0.00615437					595	-0.00195431
600	0.00245364					600	-0.00267728					600	-0.00188391					600	-0.00550638					600	0.000223369
605	0.00110771					605	-0.00333531					605	-0.00211231					605	-0.00415265					605	-0.00240911
610	0.00115119					610	-0.00182195					610	-0.00360925					610	-0.00135525					610	-0.000899734
615	0.00121839					615	8.57367e-05					615	-0.00505716					615	-0.00119042					615	-0.00103172
620	-0.000125265					620	2.63181e-05					620	-0.00183307					620	0.000385003					620	1.62956e-05
625	0.000276624					625	0.00123023					625	-0.00335193					625	-0.000867478					625	0.00243141
630	-0.000262412					630	0.000786309					630	-0.00414628					630	-0.000924974					630	0.00439225
635	0.000595445					635	2.73734e-05					635	-0.00199058					635	0.000269704					635	0.000607952
640	0.000852402					640	0.00179754					640	-0.00123019					640	0.00104438					640	-6.30267e-05
645	0.000204645					645	0.000434588					645	-0.00212066					645	-0.000136384					645	-0.00109638
650	-8.35195e-05					650	0.000405978					650	-0.00198571					650	0.000411631					650	-0.00232574
655	-0.00067049					655	0.000338207					655	3.7401e-05					655	0.000159366					655	0.000514403
660	0.00028951					660	-0.0139394					660	-3.34069e-05					660	-0.0200936					660	-0.000285845
665	-0.0492229					665	-0.263245					665	-0.0025571					665	-0.276756					665	-0.00531284
670	-0.360823					670	-0.291625					670	-0.101504					670	-0.269578					670	-0.269452
675	-0.254564					675	-0.112303					675	-0.359105					675	-0.10857					675	-0.340699
680	-0.102274					680	-0.0386748					680	-0.195229					680	-0.0530705					680	-0.0799386
685	-0.0551335					685	-0.0256538					685	-0.085918					685	-0.0316215					685	-0.0270717
690	-0.0348234					690	-0.018349					690	-0.0553795					690	-0.0192125					690	-0.0101734
695	-0.0211849					695	-0.01295					695	-0.0380667					695	-0.0129077					695	-0.00415892
700	-0.0153451					700	-0.010359					700	-0.0252162					700	-0.0104011					700	-0.000161401
705	-0.0116279					705	-0.00643367					705	-0.0178122					705	-0.00758034					705	0.00388596
710	-0.00778829					710	-0.00362611					710	-0.0142803					710	-0.00535233					710	0.00271149
715	-0.00404299					715	-0.00177629					715	-0.00985577					715	-0.00292015					715	0.00235051
720	-0.00151311					720	-0.00112315					720	-0.00871308					720	-0.00305606					720	0.000360761
725	-0.00216108					725	-0.000558716					725	-0.00818422					725	-0.000399056					725	0.00078363
730	-0.00249032					730	0.000328274					730	-0.00730573					730	-0.00186662					730	0.00194462
735	-0.00101666					735	0.00107683					735	-0.00378428					735	3.55382e-05					735	0.000830817
740	-0.000484542					740	0.00118648					740	-0.00226222					740	-0.000256148					740	-0.0015472
745	-0.00132651					745	-0.0011921					745	-0.00101712					745	-0.000453431					745	0.00107405
750	-0.000307997					750	-0.00238015					750	-0.00317369					750	0.000357636					750	-0.00046034
755	0.0002133					755	0.000302741					755	-0.0028933					755	0.00162931					755	0.000428492
760	0.00131343					760	0.00188638					760	-0.00100055					760	-0.00038851					760	0.0005771
765	0.00152949					765	0.00079039					765	-0.000277808					765	0.00195556					765	-0.00348995
770	0.000948496					770	0.000294882					770	0.00111879					770	0.00183357					770	-0.0023987
775	-0.000118475					775	-0.000440662					775	0.0028481					775	0.000929344					775	8.05044e-05
780	0.00309345					780	-0.0235563					780	0.00227808					780	-0.0202495					780	-0.00186925
785	-0.0564446					785	-0.264002					785	-0.000636433					785	-0.253503					785	-0.0198809
790	-0.321811					790	-0.238559					790	-0.115252					790	-0.227055					790	-0.280347
795	-0.189702					795	-0.0832361					795	-0.3047					795	-0.0847525					795	-0.26971
800	-0.072461					800	-0.0302144					800	-0.143858					800	-0.041158					800	-0.0646891
805	-0.0439812					805	-0.0239235					805	-0.0618965					805	-0.0253699					805	-0.0268369
810	-0.0298313					810	-0.0181345					810	-0.0416313					810	-0.015969					810	-0.0107149
815	-0.0204414					815	-0.0123266					815	-0.0289679					815	-0.0112979					815	-0.00298664
820	-0.012734					820	-0.00831065					820	-0.0191161					820	-0.00922823					820	-0.00308012
825	-0.0103844					825	-0.00413678					825	-0.0169506					825	-0.00522855					825	-0.000243593
830	-0.00766432					830	-0.00272417					830	-0.0112895					830	-0.00417805					830	-0.000368629
835	-0.00479508					835	-0.000965343					835	-0.00541945					835	-0.000733692					835	0.000566904
840	-0.00313473					840	0.000781888					840	-0.00354623					840	-0.000635748					840	0.00166633
845	-0.00131473					845	0.00130628					845	-0.00214349					845	-0.000855628					845	-0.00024836
850	-0.00187755					850	0.000347151					850	-0.00142806					850	-0.00167204					850	-0.000433298
855	-0.00200742					855	0.000346169					855	-0.000546003					855	0.00241155					855	-0.000295804
860	-0.000392291					860	0.00188013					860	0.000203708					860	0.00131979					860	-0.000106548
865	-0.000861401					865	-0.000428758					865	-0.00214286					865	-0.000121645					865	1.24592e-05
870	0.00016178					870	0.00117887					870	-0.000821457					870	0.00243058					870	-0.00019724
875	2.92061e-05					875	0.000770531					875	0.00177786					875	0.00146384					875	0.000822512
880	-0.000289086					880	-8.06836e-05					880	0.00400861					880	-0.000760198					880	-8.51119e-05
885	-0.000736512					885	0.000311239					885	0.00182031					885	-0.00159252					885	-0.000964119
890	0.00143775					890	0.00208785					890	-0.000561496					890	-0.000293106					890	0.000786681
895	0.000628892					895	0.0031601					895	-0.000137019					895	-0.00181133					895	0.0023015
900	0.0018515					900	-0.0252382					900	0.00230036					900	-0.0295948					900	7.28045e-05
905	-0.0685688					905	-0.243481					905	0.000543787					905	-0.238959					905	-0.0169228
910	-0.28706					910	-0.216524					910	-0.110411					910	-0.185935					910	-0.260518
915	-0.14092					915	-0.0758473					915	-0.263856					915	-0.065715					915	-0.230982
920	-0.0483501					920	-0.0260961					920	-0.114386					920	-0.0314848					920	-0.0551822
925	-0.0282303					925	-0.0189425					925	-0.0494949					925	-0.0201063					925	-0.0237822
930	-0.0147302					930	-0.0163265					930	-0.0351922					930	-0.0155067					930	-0.0106495
935	-0.00882042					935	-0.0113628					935	-0.0217405					935	-0.00924717					935	-0.00373875
940	-0.00659085					940	-0.0104256					940	-0.0138015					940	-0.00731063					940	-0.0018331
945	-0.00433136					945	-0.00550664					945	-0.00774808					945	-0.00484212					945	-0.0018526
950	-0.00216063					950	-0.00795907					950	-0.00428465					950	-0.0028562					950	-0.00124313
955	-0.00112075					955	-0.00450404					955	-0.000459737					955	-0.00132719					955	-0.00130313
960	-0.00292957					960	-0.00497267					960	0.00163922					960	-0.000888173					960	-0.00118343
965	-0.00280033					965	-0.00314453					965	0.00325024					965	-0.000810654					965	-0.00166219
970	-0.0020126					970	-0.0029784					970	0.00160815					970	-0.00161613					970	0.000606319
975	0.00024765					975	-0.00196418					975	0.000556052					975	-0.000756625					975	-0.000542937
980	-0.0025221					980	-0.000719957					980	0.000183958					980	-7.82036e-06					980	0.00309667
985	-0.000884865					985	-0.00159573					985	-0.00106224					985	-0.0016103					985	0.00266518
990	0.00143513					990	-0.00285633					990	-0.000326049					990	-0.000900587					990	-0.000746328
995	0.001669					995	9.53213e-05					995	-0.00256986					995	-0.000592076					995	0.00302442
1000	-2.93491e-05					1000	-0.000703415					1000	0.000866334					1000	-0.000292502					1000	-2.30757e-05
1005	0.00161035					1005	-0.000973463					1005	0.000501972					1005	0.000237498					1005	-7.3572e-05
1010	0.00164445					1010	-0.000883326					1010	0.00160093					1010	0.000768666					1010	-0.00118485
1015	0.000417242					1015	0.0021211					1015	0.00241394					1015	0.000907177					1015	-0.0015346
1020	0.00171845					1020	-0.0329852					1020	0.000629085					1020	-0.0312643					1020	-0.00270985
1025	-0.0655635					1025	-0.238153					1025	-0.00187341					1025	-0.226556					1025	-0.0228703
1030	-0.25998					1030	-0.181782					1030	-0.124633					1030	-0.160432					1030	-0.251221
1035	-0.121655					1035	-0.0557913					1035	-0.22913					1035	-0.0559035					1035	-0.177558
1040	-0.0454353					1040	-0.0165842					1040	-0.0950377					1040	-0.0264031					1040	-0.0379064
1045	-0.0269537					1045	-0.0107209					1045	-0.0461045					1045	-0.0172431					1045	-0.018211
1050	-0.0174239					1050	-0.00766097					1050	-0.0316228					1050	-0.011823					1050	-0.011112
1055	-0.0116078					1055	-0.00596454					1055	-0.0210255					1055	-0.00816446					1055	-0.00322273
1060	-0.00731802					1060	-0.00340788					1060	-0.0142521					1060	-0.00528083					1060	-0.00210174
1065	-0.00493007					1065	-0.00186145					1065	-0.0101024					1065	-0.00350132					1065	-4.39947e-06
1070	-0.00276007					1070	-0.00117095					1070	-0.00596451					1070	-0.000671818					1070	0.00297461
1075	-0.00100636					1075	-0.000180807					1075	-0.00560483					1075	-0.00192517					1075	-0.000325802
1080	0.000428412					1080	-0.000505935					1080	-0.00257029					1080	-0.00349914					1080	-0.00147804
1085	-0.000836076					1085	-0.000500483					1085	-0.00211532					1085	-0.00217402					1085	-0.000751112
1090	-0.00189828					1090	0.000107957					1090	-0.00236234					1090	0.000263336					1090	0.0019686
1095	0.00179605					1095	-0.000181493					1095	0.00026294					1095	0.000725929					1095	0.00277437
1100	-0.000129661					1100	-0.000770222					1100	0.00105574					1100	0.000426698					1100	0.00237696
1105	0.00139					1105	-0.000982251					1105	0.00189041					1105	0.000897145					1105	0.00282355
1110	0.00157417					1110	-0.000475034					1110	0.00259359					1110	-0.00197021					1110	0.000712311
1115	0.000431193					1115	-0.000571693					1115	0.00129814					1115	-0.000448385					1115	0.000995663
1120	0.000467308					1120	1.22336e-05					1120	2.22503e-05					1120	-3.37641e-05					1120	0.00141013
1125	0.00255902					1125	-0.000272636					1125	0.000157176					1125	0.00144805					1125	-0.00105842
1130	0.00152996					1130	0.000832687					1130	-0.00185723					1130	0.00065969					1130	-0.000934203
1135	0.00124215					1135	0.00221525					1135	-0.00311144					1135	0.000951176					1135	-0.00106221
1140	-0.000810213					1140	-0.0362133					1140	-0.000873813					1140	-0.0435693					1140	-0.00198923
1145	-0.0629925					1145	-0.235544					1145	-0.00106619					1145	-0.21588					1145	-0.0184288
1150	-0.236284					1150	-0.162043					1150	-0.131566					1150	-0.132091					1150	-0.228679
1155	-0.104257					1155	-0.0473606					1155	-0.199336					1155	-0.0443495					1155	-0.155038
1160	-0.0337811					1160	-0.015324					1160	-0.0723443					1160	-0.0202495					1160	-0.0326081
1165	-0.0202011					1165	-0.0127767					1165	-0.0338411					1165	-0.0143941					1165	-0.0147789
1170	-0.0133339					1170	-0.0115651					1170	-0.0249463					1170	-0.0113651					1170	-0.00441771
1175	-0.00792675					1175	-0.00833834					1175	-0.0165995					1175	-0.00832428					1175	-0.00179936
1180	-0.0042524					1180	-0.00351807					1180	-0.0103815					1180	-0.00634577					1180	-0.00164283
1185	-0.0013292					1185	-0.000644318					1185	-0.0061807					1185	-0.00474486					1185	0.000510644
1190	0.000933255					1190	-0.00174939					1190	-0.00175905					1190	-0.00215486					1190	0.000140148
1195	0.00158402					1195	-0.00210784					1195	-0.000503686					1195	0.000866397					1195	0.00143865
1200	0.00072729					1200	0.00225371					1200	7.2068e-05					1200	-0.00031272					1200	0.000267901
1205	-0.000272964					1205	0.00122527					1205	-0.000487518					1205	-0.000870906					1205	0.00190786
1210	0.000771601					1210	-0.00100318					1210	0.00242278					1210	-0.00023427					1210	-0.000213631
1215	-0.000416145					1215	-0.00131277					1215	0.000298747					1215	-0.000315916					1215	-0.00167233
1220	0.000766617					1220	-0.00235628					1220	-0.00046931					1220	-0.0020074					1220	-0.00177505
1225	-0.00182185					1225	0.000313592					1225	-0.00317551					1225	0.00165239					1225	-0.000774971
1230	-0.001649					1230	-0.0015109					1230	-0.00138194					1230	0.000787897					1230	-0.000784659
1235	-0.00162419					1235	-0.00212932					1235	0.00190483					1235	-0.000987797					1235	-0.00261435
1240	-0.00306128					1240	0.000293478					1240	0.00192875					1240	0.000515731					1240	-0.00180861
1245	-0.000890644					1245	-0.00187919					1245	0.00258195					1245	0.00270086					1245	0.000267273
1250	-0.00268034					1250	-0.00367572					1250	0.000315964					1250	4.61258e-05					1250	0.000803125
1255	-0.00195046					1255	-0.00389073					1255	-0.000137502					1255	2.3762e-06					1255	-0.00011021
1260	0.00200979					1260	-0.0544707					1260	0.000468452					1260	-0.0497312					1260	0.000165936
1265	-0.0719302					1265	-0.226702					1265	3.83338e-05					1265	-0.205085					1265	-0.0127832
1270	-0.210044					1270	-0.14087					1270	-0.13244					1270	-0.11044					1270	-0.207021
1275	-0.0725852					1275	-0.0403786					1275	-0.168131					1275	-0.0316047					1275	-0.129028
1280	-0.0185039					1280	-0.017397					1280	-0.0533794					1280	-0.015038					1280	-0.0217347
1285	-0.0104844					1285	-0.0158778					1285	-0.02495					1285	-0.0100375					1285	-0.0100235
1290	-0.00373317					1290	-0.0132307					1290	-0.0176991					1290	-0.00717862					1290	-0.00243233
1295	-0.000993042					1295	-0.010436					1295	-0.0100886					1295	-0.00647962					1295	-0.00133134
1300	0.000765412					1300	-0.00896125					1300	-0.00612175					1300	-0.00553256					1300	-0.00383691
1305	0.00138541					1305	-0.00644612					1305	-0.0027004					1305	-0.00258909					1305	-0.00234666
1310	-0.000159604					1310	-0.00190392					1310	-0.00387299					1310	-0.00144979					1310	0.000475988
1315	0.00125103					1315	-5.14026e-05					1315	-0.000675287					1315	-0.000772771					1315	-0.00113575
1320	0.00242487					1320	-0.00045985					1320	-0.000136694					1320	8.35331e-05					1320	-0.000854458
1325	-0.000943221					1325	0.000665202					1325	0.000794678					1325	-0.00134355					1325	0.000965805
1330	-0.00259601					1330	-0.000533964					1330	0.00238605					1330	-0.000469528					1330	-0.00178238
1335	-0.000496176					1335	-0.00106819					1335	0.00247819					1335	-0.00121443					1335	0.0010714
1340	0.00295744					1340	-0.000775142					1340	0.000410929					1340	0.000107224					1340	0.000889332
1345	0.000408627					1345	0.000580628					1345	0.000826197					1345	0.000517721					1345	0.00294809
1350	-0.00128912					1350	-0.00125471					1350	0.000776522					1350	0.00058332					1350	0.00135545
1355	0.000855681					1355	-0.000345561					1355	-0.000326766					1355	-0.000139709					1355	0.00162595
1360	0.00140712					1360	-0.00335394					1360	0.00160082					1360	-6.63859e-05					1360	-0.00150363
1365	0.00119117					1365	-0.000619588					1365	0.00200822					1365	-0.000245679					1365	-0.00101713
1370	0.000395224					1370	-5.1457e-05					1370	0.00227718					1370	-0.000279076					1370	-0.00130901
1375	-0.000560907					1375	0.00079703					1375	0.0017847					1375	-0.00159775					1375	-0.00225759
1380	4.90932e-05					1380	-0.0660295					1380	0.00136123					1380	-0.0623903					1380	-0.00225107
1385	-0.0764653					1385	-0.213521					1385	0.00072312					1385	-0.194097					1385	-0.0148909
1390	-0.194335					1390	-0.110662					1390	-0.129001					1390	-0.0969946					1390	-0.19177
1395	-0.0699961					1395	-0.0203101					1395	-0.133821					1395	-0.0251996					1395	-0.118935
1400	-0.028166					1400	-0.00218098					1400	-0.0322486					1400	-0.0088685					1400	-0.0177412
1405	-0.022006					1405	-0.00249617					1405	-0.00908967					1405	-0.00732751					1405	-0.0043651
1410	-0.0169464					1410	-0.00157152					1410	-0.00469829					1410	-0.00299639					1410	0.00177027
1415	-0.0111853					1415	-0.00311051					1415	-0.000483802					1415	-0.00083639					1415	-0.00114591
1420	-0.00718521					1420	-0.00310418					1420	0.00111548					1420	-0.00031241					1420	0.000562074
1425	-0.00402371					1425	0.000802032					1425	0.000214754					1425	0.000114116					1425	0.0015386
1430	-0.000193334					1430	-0.000991756					1430	-0.00125597					1430	-0.000613569					1430	-0.000935936
1435	-0.000110418					1435	-0.001047					1435	-0.00196421					1435	-0.000684977					1435	0.000893816
1440	-9.89874e-05					1440	-2.30325e-05					1440	-0.000563013					1440	0.000332758					1440	-0.00220643
1445	0.000772683					1445	-0.00145956					1445	-0.00191932					1445	0.000870232					1445	-0.00138174
1450	0.000689955					1450	-0.00171638					1450	-0.00241587					1450	0.000977507					1450	-0.000497023
1455	0.000885665					1455	0.000141526					1455	-0.00316862					1455	0.000697469					1455	-0.000130786
1460	0.00220798					1460	0.000141868					1460	-0.00275367					1460	0.000327569					1460	0.000504674
1465	0.000268611					1465	-0.00153166					1465	-0.000147368					1465	0.00215757					1465	0.00109811
1470	0.00220082					1470	-0.00128011					1470	0.000743685					1470	0.0024419					1470	-8.13889e-05
1475	0.000531223					1475	0.000225591					1475	-0.000122681					1475	0.000190889					1475	0.000719107
1480	-0.00114137					1480	-0.000488682					1480	-0.00229131					1480	0.00184217					1480	0.000549604
1485	-0.00115471					1485	0.000110512					1485	-0.0010553					1485	0.00085318					1485	-0.00194289
1490	0.000504402					1490	-8.38102e-05					1490	0.000752282					1490	0.000544194					1490	0.000510887
1495	0.000685312					1495	0.00369542					1495	0.000495342					1495	0.00117777					1495	-0.00022376
1500	-0.000105069					1500	-0.076961					1500	0.00247809					1500	-0.0618093					1500	0.0018275
1505	-0.0917341					1505	-0.208121					1505	-0.000883432					1505	-0.174856					1505	-0.0159525
1510	-0.176494					1510	-0.103059					1510	-0.134323					1510	-0.0864722					1510	-0.183413
1515	-0.0556716					1515	-0.0226109					1515	-0.118349					1515	-0.0210287					1515	-0.0922914
1520	-0.0226919					1520	-0.00208922					1520	-0.02915					1520	-0.00802096					1520	-0.00748315
1525	-0.0159823					1525	0.00119009					1525	-0.00986133					1525	-0.00375563					1525	0.000752518
1530	-0.0095227					1530	0.000742077					1530	-0.00410952					1530	-0.00171464					1530	0.000836811
1535	-0.00477913					1535	-0.000135935					1535	0.0012429					1535	-0.00134969					1535	0.00203112
1540	-0.000878492					1540	-0.000923947					1540	0.00367816					1540	0.000389319					1540	0.00118963
1545	0.000523757					1545	-0.000391959					1545	0.00271743					1545	-0.00076654					1545	-0.000613814
1550	0.00202979					1550	-0.000806251					1550	0.00180632					1550	0.000681475					1550	-0.00163456
1555	-7.42935e-06					1555	-0.00129866					1555	5.80179e-05					1555	0.000800594					1555	-0.00123366
1560	-0.000325538					1560	-0.00116105					1560	-0.0011889					1560	-0.000341902					1560	0.00185932
1565	0.000206354					1565	-0.00121223					1565	-0.00226857					1565	-0.000159376					1565	0.00126795
1570	0.00274998					1570	0.00185796					1570	-0.0019843					1570	-0.00202201					1570	0.000209683
1575	0.000893668					1575	0.00102675					1575	-0.00139293					1575	-0.000474029					1575	-0.000997098
1580	0.000548098					1580	0.00179184					1580	-0.00346868					1580	0.00048439					1580	0.00127588
1585	-0.0004774					1585	0.00144355					1585	-0.00337215					1585	0.00116233					1585	0.000744115
1590	0.00224645					1590	0.00461432					1590	-0.00126251					1590	-0.000230129					1590	0.0029872
1595	-0.000179813					1595	0.00274959					1595	-0.00205114					1595	-0.00127402					1595	0.000116379
1600	-0.000338614					1600	0.000649334					1600	0.000362845					1600	-0.000849392					1600	-0.00037422
1605	-0.000778026					1605	0.00148625					1605	0.000998005					1605	0.000863155					1605	-0.000744472
1610	-0.00122134					1610	0.00248561					1610	-0.00107974					1610	-0.00241694					1610	-0.00165075
1615	-0.00153593					1615	-0.000676845					1615	-0.000530783					1615	-0.000759484					1615	-7.7087e-05
1620	0.000418158					1620	-0.133751					1620	0.00224795					1620	-0.0744158					1620	0.000442913
1625	-0.0981376					1625	-0.168722					1625	-0.00276721					1625	-0.162659					1625	-0.0241531
1630	-0.1524					1630	-0.0639691					1630	-0.131753					1630	-0.0766785					1630	-0.184615
1635	-0.0412004					1635	-0.00799973					1635	-0.0972164					1635	-0.019587					1635	-0.0763963
1640	-0.010589					1640	0.000286068					1640	-0.0214159					1640	-0.0110136					1640	-0.0105485
1645	-0.00643011					1645	-0.00253238					1645	-0.00609593					1645	-0.0064334					1645	-0.00291076
1650	-0.000880204					1650	-0.001492					1650	-0.00236325					1650	-0.0034739					1650	0.00117275
1655	-0.000109568					1655	-0.000358893					1655	0.000164656					1655	-0.00224439					1655	-0.000101473
1660	0.000321024					1660	-0.000475787					1660	0.00050491					1660	-0.00242489					1660	0.0012337
1665	-3.53653e-05					1665	0.000370948					1665	0.00225007					1665	0.00130415					1665	0.00127321
1670	-0.00151108					1670	-0.00142813					1670	0.00199437					1670	0.000317918					1670	-0.000568676
1675	-0.00021278					1675	-0.00135622					1675	0.00334469					1675	-0.00257329					1675	-0.00101942
1680	0.00139704					1680	0.000187965					1680	0.00264647					1680	-0.00146601					1680	-0.000406098
1685	0.00169665					1685	-0.000815993					1685	-0.000304256					1685	-0.00143956					1685	0.0013244
1690	0.00253586					1690	9.0129e-05					1690	-0.00128076					1690	1.87559e-06					1690	-0.000334067
1695	0.00118637					1695	0.000559258					1695	-0.00360423					1695	-0.00117676					1695	-0.000734563
1700	0.000682485					1700	0.000406578					1700	-0.0034486					1700	0.000357514					1700	0.00116961
1705	0.000409699					1705	-0.00152788					1705	-0.000723441					1705	-0.000298206					1705	0.000818614
1710	0.000410146					1710	0.000946143					1710	-0.00201828					1710	-0.000881472					1710	0.00255525
1715	0.000660375					1715	-0.00127817					1715	-0.00145842					1715	-0.00181555					1715	0.00043326
1720	0.000224333					1720	-0.000892349					1720	0.000905368					1720	-0.00129712					1720	0.00106391
1725	0.00111524					1725	0.000272734					1725	0.00135749					1725	0.000189519					1725	0.00293682
1730	-0.0015499					1730	-0.000659407					1730	0.000112649					1730	-0.00196085					1730	0.00141824
1735	5.02281e-05					1735	-0.0201587					1735	0.000373579					1735	-0.001614					1735	-0.000868214
1740	-0.000118099					1740	-0.176236					1740	0.00057116					1740	-0.0751434					1740	-0.00331125
1745	-0.102789					1745	-0.128495					1745	-0.00795375					1745	-0.153697					1745	-0.0403803
1750	-0.130483					1750	-0.0343966					1750	-0.134571					1750	-0.0675671					1750	-0.17951
1755	-0.0247541					1755	-0.00284896					1755	-0.0879424					1755	-0.0126187					1755	-0.0589281
1760	-0.00251552					1760	-0.000148963					1760	-0.0173548					1760	-0.00560398					1760	-0.0114163
1765	-0.000676143					1765	0.00189971					1765	-0.00583737					1765	-0.00334448					1765	-0.00409458
1770	0.00129487					1770	-0.00178864					1770	-0.00240358					1770	-0.000704687					1770	-0.000129813
1775	-0.000349241					1775	-0.00138554					1775	0.00136052					1775	0.000543328					1775	0.000511179
1780	-0.00217645					1780	-3.70985e-05					1780	0.00126843					1780	0.00213218					1780	0.00250486
1785	0.000797504					1785	-0.000351916					1785	-7.79701e-05					1785	-4.02995e-05					1785	0.000681881
1790	0.00133764					1790	-0.00123118					1790	-0.000107645					1790	-0.000207697					1790	-3.80788e-05
1795	0.000159292					1795	0.00110643					1795	0.00152636					1795	-0.000979682					1795	-0.00088056
1800	0.00105005					1800	-0.00129154					1800	0.000419105					1800	-0.00144746					1800	-0.000427234
1805	0.00016333					1805	0.00048041					1805	0.00112435					1805	-0.000835265					1805	0.000161029
1810	0.00244333					1810	-0.00122996					1810	-0.00118153					1810	-0.00144061					1810	0.000823243
1815	0.00249685					1815	0.00061575					1815	-0.000348813					1815	-0.0010673					1815	-0.00140351
1820	0.0013266					1820	0.0012877					1820	0.00284498					1820	-0.00133271					1820	-0.00109591
1825	0.000130725					1825	0.000351601					1825	0.000601132					1825	-0.000750021					1825	-0.0013145
1830	-0.0012708					1830	0.00202633					1830	0.0019425					1830	-0.000424829					1830	0.000479656
1835	-0.00111681					1835	0.00118701					1835	-0.00116737					1835	-0.00162216					1835	0.00220497
1840	7.33142e-05					1840	0.000212547					1840	0.000519165					1840	-0.000275743					1840	0.00364083
1845	-0.000522349					1845	0.000203562					1845	-0.000878888					1845	-0.00150223					1845	0.00320991
1850	-0.0016421					1850	0.00019299					1850	0.000426274					1850	0.000616277					1850	0.001439
1855	0.000158626					1855	-0.0430282					1855	-0.00170587					1855	-0.00394823					1855	0.00127594
1860	-0.00107125					1860	-0.17388					1860	0.00290896					1860	-0.0903566					1860	0.00202436
1865	-0.10832					1865	-0.100938					1865	-0.00599428					1865	-0.142428					1865	-0.0398178
1870	-0.114601					1870	-0.020519					1870	-0.129209					1870	-0.0586626					1870	-0.168167
1875	-0.0211923					1875	-0.00242363					1875	-0.0703573					1875	-0.0115929					1875	-0.0509288
1880	-0.0049634					1880	-0.00296461					1880	-0.0103497					1880	-0.000842482					1880	-0.00940643
1885	-0.000639964					1885	-0.00141936					1885	-0.00262925					1885	-0.00135347					1885	-0.00141184
1890	0.000691307					1890	-0.00128625					1890	-0.00232997					1890	0.00053396					1890	-9.88661e-05
1895	-0.00178984					1895	-0.00146952					1895	-0.00188069					1895	0.00122049					1895	-0.000542559
1900	-0.00105047					1900	-0.000929081					1900	-0.000273177					1900	-0.000272988					1900	-0.000816033
1905	-0.000307292					1905	-0.000960397					1905	0.000847149					1905	-0.00137646					1905	-0.00117434
1910	-0.000536402					1910	-0.00296273					1910	-0.00105647					1910	-0.000769935					1910	-0.000906075
1915	-0.00155699					1915	-0.000878056					1915	-0.00168856					1915	-0.000440123					1915	-0.000942776
1920	-0.00276622					1920	-0.000713472					1920	-0.00127688					1920	0.000338884					1920	-0.000512528
1925	-0.000476539					1925	0.000540975					1925	-0.00304665					1925	-0.000194519					1925	-0.000735846
1930	0.000369047					1930	-0.000456207					1930	-0.00178774					1930	-0.000803902					1930	-0.00232089
1935	0.00134545					1935	-0.000424806					1935	-0.000217386					1935	-0.0021588					1935	-0.00173013
1940	0.00124215					1940	0.000144657					1940	0.000617769					1940	-0.00225635					1940	0.000327645
1945	0.00138016					1945	-0.00148976					1945	0.00200433					1945	-0.00142044					1945	0.000200658
1950	0.000819777					1950	-0.0012224					1950	-5.42079e-05					1950	-2.57578e-05					1950	-0.0020586
1955	0.0010094					1955	-0.00128871					1955	0.00117917					1955	0.000263674					1955	0.000386445
1960	0.000283881					1960	-0.00132761					1960	0.00152823					1960	0.00169174					1960	-0.00102383
1965	6.51808e-05					1965	-0.000109166					1965	0.00255763					1965	0.0012057					1965	-0.0031681
1970	0.000303793					1970	-0.00165664					1970	0.00231823					1970	0.000328251					1970	-0.00305055
1975	0.00385982					1975	-0.05846					1975	0.00231718					1975	0.0014944					1975	-3.11263e-05
1980	0.000482897					1980	-0.182586					1980	0.00639469					1980	-0.0837399					1980	0.0014821
1985	-0.116498					1985	-0.0950958					1985	-0.00990459					1985	-0.130662					1985	-0.0464462
1990	-0.101479					1990	-0.0172578					1990	-0.122516					1990	-0.0483506					1990	-0.156729
1995	-0.0206194					1995	-0.000692478					1995	-0.0509951					1995	-0.00578127					1995	-0.0404
2000	-0.00782692					2000	-0.0018585					2000	-0.00371953					2000	-0.0005268					2000	-0.0101982
2005	-0.000838191					2005	-0.000288067					2005	-0.000510581					2005	0.0024683					2005	-0.00265098
2010	0.0026723					2010	-0.000932507					2010	0.000705085					2010	0.00268383					2010	-0.00032282
2015	0.000113187					2015	0.000757596					2015	0.00161057					2015	0.00151292					2015	0.000779209
2020	0.000914076					2020	0.000158031					2020	-0.000147512					2020	0.000790436					2020	0.00198673
2025	4.49663e-05					2025	-3.21953e-06					2025	-0.000320341					2025	0.002613					2025	0.000349997
2030	9.68317e-05					2030	-0.000784337					2030	-0.000411923					2030	-0.00088556					2030	-9.00028e-05
2035	-0.00109152					2035	-0.00281041					2035	-0.00075184					2035	-0.0018778					2035	0.000120017
2040	0.000417843					2040	-0.00194977					2040	0.0013702					2040	0.000248678					2040	0.0015725
2045	0.00133759					2045	-0.0032989					2045	0.000728796					2045	0.00104543					2045	0.00169557
2050	0.00178624					2050	-0.00265062					2050	0.00439888					2050	0.00020268					2050	0.00249302
2055	0.000787388					2055	-0.00118448					2055	0.00240598					2055	-0.000339601					2055	0.00167048
2060	0.00133893					2060	-0.000812082					2060	0.0023241					2060	0.000789177					2060	0.00383901
2065	0.00195389					2065	-0.0011009					2065	0.00385968					2065	8.52823e-06					2065	0.00191117
2070	-0.000747541					2070	0.00187809					2070	0.00239583					2070	-0.00100049					2070	-0.00048433
2075	0.00220951					2075	0.00259577					2075	0.00219989					2075	0.00102109					2075	-0.00129162
2080	0.00168242					2080	-0.00103726					2080	0.00112406					2080	-2.51002e-05					2080	0.000471498
2085	0.00101767					2085	-0.00044165					2085	0.00121659					2085	0.000751188					2085	-0.000158099
2090	0.000397867					2090	-0.00190027					2090	0.00223912					2090	0.00122401					2090	-0.00168478
2095	0.00289073					2095	-0.107887					2095	0.00418863					2095	0.000707558					2095	-0.00173428
2100	-0.00206031					2100	-0.139216					2100	0.00647103					2100	-0.105073					2100	-0.000313972
2105	-0.113763					2105	-0.048616					2105	-0.00982328					2105	-0.12313					2105	-0.0555732
2110	-0.0790841					2110	-0.00266643					2110	-0.118028					2110	-0.0347064					2110	-0.142435
2115	-0.0111347					2115	-0.000886615					2115	-0.047244					2115	-0.00312459					2115	-0.0260866
2120	-0.0020627					2120	-0.00161506					2120	-0.00208122					2120	-0.00160806					2120	-0.00465767
2125	-0.00139219					2125	0.000647669					2125	-0.00102659					2125	-0.000891533					2125	0.000130837
2130	-0.00015109					2130	0.00284273					2130	-0.000998679					2130	0.000826532					2130	0.00241716
2135	-9.43775e-06					2135	0.0016005					2135	-0.000157351					2135	-0.00127645					2135	0.00135518
2140	-0.00178118					2140	0.000328588					2140	-0.000909741					2140	-0.00075704					2140	9.07878e-05
2145	-0.000371184					2145	-0.000789424					2145	-0.00141814					2145	5.14716e-05					2145	-0.000919957
2150	0.000578816					2150	-0.000985231					2150	0.00238182					2150	-0.00198021					2150	-0.00026681
2155	2.88155e-05					2155	-0.00232644					2155	0.00116513					2155	-0.000223236					2155	0.00140294
2160	0.00106882					2160	-0.000354817					2160	0.000813376					2160	-0.000519786					2160	0.00141693
2165	-7.1687e-05					2165	6.0181e-05					2165	0.00152292					2165	0.00105323					2165	0.00247817
2170	0.00048844					2170	-0.00113296					2170	-0.00121433					2170	0.000821635					2170	0.000807015
2175	0.000323031					2175	-0.00024069					2175	-0.000175611					2175	0.0013116					2175	-0.000243729
2180	-0.00133646					2180	0.000354229					2180	0.00068576					2180	0.000246946					2180	0.000255526
2185	0.000210497					2185	0.00105298					2185	-0.000512868					2185	0.00125432					2185	0.000424782
2190	-0.00162292					2190	0.00231731					2190	-0.000161496					2190	0.001317					2190	-0.00125335
2195	-0.000237283					2195	0.00113433					2195	-0.000580102					2195	0.000682214					2195	-0.000434187
2200	0.000564147					2200	0.00113781					2200	4.5061e-05					2200	0.0007125					2200	-0.000245735
2205	0.000591096					2205	0.001592					2205	0.000566621					2205	0.000965769					2205	-0.000270187
2210	0.00159056					2210	-0.00336591					2210	-0.000216483					2210	0.00311687					2210	-0.00179714
2215	0.0047307					2215	-0.112159					2215	-0.000654497					2215	7.60995e-05					2215	0.000164602
2220	-0.000157034					2220	-0.121597					2220	0.000456875					2220	-0.094366					2220	-0.00161859
2225	-0.112504					2225	-0.0389429					2225	-0.0264285					2225	-0.109305					2225	-0.0646571
2230	-0.0709652					2230	-0.000843237					2230	-0.123513					2230	-0.032803					2230	-0.132726
2235	-0.00460556					2235	-0.00220901					2235	-0.0419333					2235	-0.00114155					2235	-0.0193641
2240	0.00013444					2240	-0.00142064					2240	-0.00291948					2240	-0.000780218					2240	9.5822e-05
2245	-0.000361972					2245	-0.000742668					2245	0.00029508					2245	-0.000391707					2245	0.0004121
2250	-0.000877394					2250	-0.00216801					2250	-0.000252504					2250	0.00102634					2250	0.000446594
2255	-0.0018424					2255	0.000903658					2255	0.000567094					2255	0.000772869					2255	-0.000583406
2260	-0.000602669					2260	-0.000903634					2260	0.00120601					2260	0.000887702					2260	0.000836594
2265	0.00135985					2265	0.000474813					2265	-0.00133387					2265	0.000658199					2265	0.000617699
2270	0.0012671					2270	-0.000457985					2270	-0.00100181					2270	0.000137536					2270	0.000395218
2275	-2.35424e-05					2275	-0.000857549					2275	-0.000109756					2275	0.000365108					2275	0.000712737
2280	0.00173032					2280	-0.000735471					2280	0.00141482					2280	-0.00200295					2280	0.000980255
2285	0.00151569					2285	-0.00019545					2285	0.000931715					2285	-0.000364991					2285	0.00160423
2290	0.00036525					2290	0.000153974					2290	0.00112444					2290	-0.00104139					2290	0.00269324
2295	1.57897e-05					2295	-0.0023969					2295	0.000187181					2295	0.000728609					2295	-0.0021019
2300	0.000959999					2300	-0.00116092					2300	-0.000631729					2300	0.00120415					2300	9.83459e-05
2305	0.00026471					2305	-0.00185425					2305	0.000789643					2305	0.00228315					2305	0.00124719
2310	-0.000717915					2310	-0.00187745					2310	0.000698547					2310	-0.000540655					2310	0.00132769
2315	-0.000380387					2315	-0.000990474					2315	0.000516484					2315	-0.00066208					2315	0.0016611
2320	0.00032844					2320	-0.00091349					2320	0.00257786					2320	-0.00165927					2320	0.000136448
2325	-0.00205272					2325	-0.000396502					2325	-0.000156389					2325	-0.000318736					2325	0.00197134
2330	-0.000553697											2330	5.7464e-05					2330	-0.0019182					2330	-0.000262029
2335	0.00206533											2335	0.000558578											2335	-0.000350288
												2340	0.0024535											2340	-0.0023383
												2345	-0.0273372											2345	-0.0696851
												2350	-0.111497											2350	-0.116572
												2355	-0.0318135											2355	-0.0146635
												2360	-0.0030308											2360	-0.00317204
												2365	-0.000955638											2365	-0.000764452
												2370	0.0019842											2370	-0.000595941
												2375	0.000798316											2375	-0.000727185
												2380	0.0012166											2380	-0.00110942
												2385	-0.000530651											2385	0.0021196
												2390	-0.00216381											2390	0.0015883
												2395	-0.000778644											2395	0.00196713
												2400	-0.000315568											2400	0.000593463
												2405	-0.00127282											2405	0.000589335
												2410	-0.000132382											2410	-0.00181116
												2415	-0.00114549											2415	-0.000109793
												2420	0.00166537											2420	-0.000816005
												2425	0.000372947											2425	0.00104245
												2430	0.000792974											2430	8.891e-05
												2435	0.000725032											2435	-0.000989269
												2440	0.00123608											2440	-0.000853558
												2445	-6.49641e-05											2445	0.00205031
												2450	-0.000109464											2450	0.000401058
												2455	0.00072985											2455	-0.000908198
												2460	0.000849164
