# Supplementary material for: Structural insights into sodium transport by the oxaloacetate decarboxylase sodium pump
Source: eLife. 2020 May 27;9:e53853. doi: 10.7554/eLife.53853 (PMC7274780; doi:10.7554/eLife.53853)
Supplement: Figure 6—source data 1. [file elife-53853-fig6-data1.xlsx]

## Sheet: Sheet1
WT, Mes, pH 5.55						WT, Mes, pH 5.75						WT, Tris, pH 8.45						Ref exp, Mes, pH 5.55			Ref exp, Mes, pH 5.75			Ref expk Tris, pH 8.45			E40A, Mes, pH 5.55						E40A, Mes, pH 5.75						E40A, Tris, pH 8.45
Time (S)	(mCal/S)	Molar ratio	Cal/mole of injectant	fit		Time (S)	(mCal/S)	Molar ratio	Cal/mole of injectant	fit		Time (S)	(mCal/S)	Molar ratio	Cal/mole of injectant	fit		Time (S)	(mCal/S)		Time (S)	(mCal/S)		Time (S)	(mCal/S)		Time (S)	(mCal/S)	Molar ratio	Cal/mole of injectant	fit		Time (S)	(mCal/S)	Molar ratio	Cal/mole of injectant	fit		Time (S)	(mCal/S)	Molar ratio	Cal/mole of injectant	fit
5	-0.00150812	0.830012		-379.858		5	-0.00234847	0.830012		-456.983		5	0.000610268	0.830012		-769.106		5	-0.00184896		5	0.00125882		5	0.00019584		5	5.95812e-05	﻿0.830012		-187.83		5	0.00128566	0.830012		-183.109		5	-0.00670824	0.830012		-200.577
6	-0.00123347	5.00483	﻿-303.944	-301.933		6	-0.00134539	5.00483	-357.613	-353.97		6	-5.25876e-05	5.00483	-496.83	-493.2		6	-0.0014569		6	0.00135694		6	8.66462e-05		6	0.000900512	5.00483	-165.052	-159.525		6	0.00101798	5.00483	-155.115	-152.67		6	-0.00456337	5.00483	-154.636	-152.046
7	-0.00108882	9.22089	-209.468	-211.155		7	-0.000512307	9.22089	-234.002	-238.103		7	-0.000415443	9.22089	-236.522	-247.252		7	-0.00181484		7	0.00107507		7	-6.25475e-05		7	0.000431442	9.22089	-119.29	-123.281		7	0.000800306	9.22089	-113.13	-114.735		7	-0.00201849	9.22089	-94.2642	-98.9987
8	-0.000454172	13.4782	-151.529	-154.133		8	0.000560775	13.4782	-164.614	-168.616		8	-0.0010083	13.4782	-139.627	-141.758		8	-0.00147278		8	0.000963191		8	-0.000351741		8	0.000872372	13.4782	-93.9831	-97.5485		8	0.000532627	13.4782	-86.4446	-88.7235		8	0.000306382	13.4782	-66.4389	-68.3811
9	-0.00163952	17.7768	-116.107	-116.562		9	3.38579e-05	17.7768	-122.546	-124.539		9	-0.00110116	17.7768	-91.6472	-90.152		9	9.27972e-06		9	0.00109132		9	-0.000380935		9	0.000373303	17.7768	-76.1186	-78.7563		9	0.000694949	17.7768	-68.0975	-70.2818		9	0.00197126	17.7768	-50.9115	-49.5544
10	-0.00242488	22.1166	-89.5643	-90.7403		10	0.00117694	22.1166	-94.3469	-95.1604		10	-0.000864011	22.1166	-64.5422	-61.764		10	0.00063134		10	0.00114944		10	3.98712e-05		10	-0.000605767	22.1166	-63.1294	-64.6849		10	0.000967271	22.1166	-56.4617	-56.8151		10	0.00236613	22.1166	-37.8182	-37.3103
11	-0.00298009	26.4977	-71.1194	-72.3428		11	0.000790117	26.4977	-74.9454	-74.74		11	-0.000796841	26.4977	-49.7981	-44.6782		11	0.00127343		11	0.000667279		11	-9.32273e-06		11	-0.00180487	26.4977	-51.0998	-53.9145		11	0.00136933	26.4977	-46.3967	-46.7251		11	0.00149112	26.4977	-28.9684	-28.9644
12	-0.00219529	30.92	-59.9392	-58.8286		12	-0.000376693	30.92	-61.0487	-60.0398		12	-0.000859668	30.92	-38.5754	-33.6672		12	0.00210553		12	-0.000304924		12	0.00100148		12	-0.00143399	30.92	-44.2641	-45.5108		12	0.000921349	30.92	-39.3193	-38.9945		12	-2.38831e-05	30.92	-25.582	-23.05
13	-0.00225049	35.3836	-49.2636	-48.6405		13	-0.0012435	35.3836	-49.7087	-49.1413		13	-0.000552494	35.3836	-29.6773	-26.1856		13	0.00173763		13	-0.000197126		13	0.000702289		13	-0.0010531	35.3836	-39.3533	-38.8421		13	0.00040337	35.3836	-33.1883	-32.9555		13	-0.000858882	35.3836	-14.8297	-18.7211
14	-0.00118568	39.8885	-40.9552	-40.7875		14	-0.00149031	39.8885	-42.5567	-40.8576		14	-0.000175321	39.8885	-24.5623	-20.8845		14	0.000449728		14	-0.000819328		14	-0.000596904		14	-0.000802214	39.8885	-34.2643	-33.4708		14	-0.000444609	39.8885	-29.286	-28.1574		14	-0.00128388	39.8885	-18.4285	-15.4657
15	-0.00023088	44.4345	-35.8144	-34.6176		15	-0.00308713	44.4345	-36.0834	-34.4261		15	-0.000968148	44.4345	-20.4904	-16.999		15	-0.000108173		15	-0.00102153		15	-0.0013761		15	-0.000531327	44.4345	-29.2778	-29.0871		15	-0.00138259	44.4345	-25.0045	-24.2878		15	-0.00202888	44.4345	-14.9924	-12.9605
16	0.000684357	49.0219	-31.1304	-29.6888		16	-0.00265375	49.0219	-32.1334	-29.3402		16	-0.00113082	49.0219	-18.3392	-14.0702		16	-0.000326026		16	-0.00122436		16	-0.00125529		16	0.000409553	49.0219	-27.0857	-25.4672		16	-0.0022912	49.0219	-22.1053	-21.1257		16	-0.000943696	49.0219	-12.1204	-10.9945
17	-0.00014027	53.6505	-26.8682	-25.6939		17	-0.00184031	53.6505	-27.327	-25.2539		17	-0.000473451	53.6505	-14.9779	-11.8102		17	-0.000833863		17	-0.00106739		17	-0.000964484		17	-0.00014957	53.6505	-24.8015	-22.4463		17	-0.00188002	53.6505	-18.4538	-18.5113		17	0.000931545	53.6505	-10.9882	-9.42517
18	0.000285102	58.3203	-24.3544	-22.4139		18	-0.000976872	58.3203	-25.1282	-21.9246		18	-0.00020608	58.3203	-13.3646	-10.0312		18	-0.0003817		18	-0.00152042		18	0.000486324		18	-0.00121869	58.3203	-22.73	-19.9014		18	-0.00107883	58.3203	-18.0256	-16.327		18	0.00105679	58.3203	-8.02856	-8.15369
19	0.000740475	63.0314	-20.6603	-19.6901		19	-0.000523434	63.0314	-21.7758	-19.1782		19	-0.000308709	63.0314	-11.7826	-8.60658		19	0.000310462		19	-0.000793452		19	0.000917131		19	-0.000767815	63.0314	-20.1605	-17.7391		19	-0.00083765	63.0314	-15.4523	-14.4847		19	0.000722028	63.0314	-7.42776	-7.11002
20	0.000525847	67.7838	-19.6377	-17.405		20	-0.000349996	67.7838	-19.4923	-16.8878		20	0.000128663	67.7838	-10.3921	-7.44851		20	0.000592625		20	-0.000866482		20	0.000887939		20	-3.69376e-05	67.7838	-18.8293	-15.8875		20	-0.000586465	67.7838	-14.4348	-12.9177		20	0.00151727	67.7838	-7.3255	-6.24335
21	0.000451923	72.5774	-17.1369	-15.4701		21	-0.000596163	72.5774	-17.6363	-14.9587		21	0.000416347	72.5774	-9.09559	-6.49463		21	0.000434836		21	-0.00108018		21	0.000588756		21	-0.000635969	72.5774	-17.8841	-14.2907		21	-0.000795952	72.5774	-12.9922	-11.5743		21	0.00215274	72.5774	-7.47522	-5.51617
22	0.00111839	77.4123	-15.7118	-13.8183		22	0.00027789	77.4123	-16.1603	-13.3194		22	0.000214201	77.4123	-8.54984	-5.69968		22	0.000437074		22	-0.000704241		22	0.000269579		22	-0.000284952	77.4123	-16.9766	-12.9047		22	-0.00190581	77.4123	-11.6874	-10.4146		22	0.00215834	77.4123	-6.50072	-4.90033
23	0.000954852	82.2884	-13.3707	-12.3973		23	0.000201943	82.2884	-14.4833	-11.9151		23	0.00107205	82.2884	-7.69082	-5.03018		23	4.9311e-05		23	-0.000498305		23	-0.0010696		23	-0.000293935	82.2884	-15.2311	-11.6944		23	-0.00379567	82.2884	-10.1366	-9.40693		23	0.00240394	82.2884	-6.29503	-4.37437
24	0.000261317	87.2058	-12.5009	-11.1664		24	4.59953e-05	87.2058	-15.2065	-10.7033		24	0.000219908	87.2058	-6.48378	-4.46097		24	-0.000808452		24	-0.000542369		24	0.000101226		24	-0.000672918	87.2058	-14.1644	-10.6316		24	-0.00425553	87.2058	-10.1713	-8.52612		24	0.00172954	87.2058	-4.3139	-3.9217
25	-0.000182218					25	-0.000629952					25	-2.23876e-06					25	-0.000766214		25	-0.000516433		25	0.000322049		25	-0.0014319					25	-0.00494538					25	0.00092514
26	0.000385055					26	-0.000635324					26	0.00038602					26	-0.000303931		26	-5.09613e-05		26	0.000332884		26	-0.00146068					26	-0.00461545					26	-0.000249049
27	0.000143058					27	-0.00125018					27	5.46323e-05					27	-0.000901609		27	-3.59088e-05		27	0.000553729		27	-0.000779272					27	-0.00296571					27	-0.00283305
28	-0.000948938					28	-0.00122503					28	1.32449e-05					28	-0.000939287		28	-0.000110856		28	0.000964574		28	-0.000597867					28	-0.00112597					28	-0.00483704
29	-0.00165093					29	-0.000879879					29	0.00167186					29	-0.000706965		29	-0.000265804		29	0.000385419		29	-0.000486462					29	0.000303778					29	-0.00507104
30	-0.000162931					30	0.000195269					30	0.00184047					30	-3.46427e-05		30	-0.000140751		30	-0.000293736		30	0.000214943					30	0.00111352					30	-0.00503504
31	1.58737e-05					31	0.000501089					31	0.00134948					31	-0.000372274		31	0.000214065		31	-0.000362884		31	0.000616667					31	0.00167385					31	-0.00373883
32	0.000255848					32	0.00104789					32	0.00120903					32	0.000500161		32	-8.14653e-05		32	-0.00123202		32	-0.000441162					32	0.000365028					32	0.000157657
33	0.000945823					33	0.00100469					33	8.58744e-06					33	0.0012026		33	1.30047e-05		33	-0.00160116		33	0.000351009					33	-0.000613792					33	0.00236415
34	0.0012758					34	0.00147149					34	-0.000801857					34	0.00130503		34	-0.000162525		34	-0.0016303		34	0.00108318					34	-0.00147261					34	0.00346064
35	0.000825773					35	0.00126829					35	-0.0017023					35	0.000467464		35	-6.80553e-05		35	-0.000979438		35	0.00035535					35	-0.000611433					35	0.00268713
36	0.000686438					36	0.00107572					36	-0.00174244					36	0.000169941		36	-7.36582e-05		36	-0.00155857		36	0.000647866					36	-0.000239257					36	0.00112382
37	0.000278814					37	0.00106469					37	-0.00125187					37	0.000752516		37	0.000650558		37	-0.000657672		37	0.00144119					37	0.00129539					37	-0.00196902
38	0.000231189					38	0.00150367					38	-0.000451303					38	-0.000354909		38	0.00106477		38	0.000183223		38	0.00197451					38	0.00251003					38	-0.00267185
39	0.000753565					39	0.00153265					39	-0.000400734					39	-0.000392334		39	0.00119899		39	0.000204118		39	0.00172783					39	0.00229468					39	-0.00312468
40	-0.000174059					40	0.00133162					40	0.00135984					40	-0.000499759		40	0.000303206		40	0.000595014		40	0.00258115					40	0.000899322					40	-0.00326751
41	-0.00059122					41	0.00197102					41	0.00117062					41	-0.000117155		41	-0.000152582		41	0.00147592		41	0.00270472					41	0.000934861					41	-0.00350019
42	-1.6097e-05					42	0.0012725					42	0.00071236					42	-0.00119443		42	-0.00054839		42	0.000956911		42	0.00246939					42	4.48025e-05					42	-0.00364214
43	0.000349026					43	0.00147397					43	0.000974102					43	-0.000211695		43	-0.000614197		43	0.000177897		43	0.00166405					43	-0.000305256					43	-0.00503408
44	-2.58518e-05					44	0.00121545					44	0.000335843					44	0.000151035		44	0.000129995		44	-0.00112112		44	0.00186872					44	4.46859e-05					44	-0.00716602
45	0.000259271					45	0.00196693					45	-0.000522415					45	5.37651e-05		45	0.00121419		45	-0.00226013		45	0.00139339					45	0.00104463					45	-0.00650797
46	0.000794547					46	0.00186853					46	-0.000960588					46	-0.000393493		46	0.00139838		46	-0.00164914		46	0.000268134					46	4.90811e-06					46	-0.00587984
47	0.000172736					47	0.00154259					47	-0.000687553					47	-0.000160583		47	0.000262676		47	-0.001588		47	0.000603992					47	0.000121627					47	-0.00375047
48	-7.90747e-05					48	0.000756639					48	-0.000854519					48	-0.000247673		48	-0.000983033		48	-0.00180687		48	0.000339849					48	-0.000501654					48	-0.000841086
49	0.000739115					49	-0.000109308					49	0.000508516					49	-0.000114763		49	-0.00178874		49	-0.000485734		49	-0.000384294					49	-0.000534935					49	0.00267829
50	0.0017773					50	-0.000625254					50	0.00108155					50	0.000678147		50	-0.00188445		50	0.000995401		50	-0.000898437					50	-4.82154e-05					50	0.00421767
51	0.00137549					51	-0.0010712					51	0.00177458					51	0.00112106		51	-0.00165016		51	0.000126535		51	-0.000912579					51	0.0010285					51	0.00593705
52	0.00213677					52	1.51463e-05					52	0.000658955					52	0.000804165		52	-0.000505622		52	-0.000342094		52	-0.00176588					52	0.00156283					52	0.00534824
53	0.00276827					53	0.000171663					53	0.000583396					53	-2.27154e-05		53	0.000448934		53	-0.000160706		53	-0.00117914					53	0.00219772					53	0.00369956
54	0.00206978					54	0.000778179					54	0.000107837					54	-0.000359596		54	0.000173491		54	-0.000599318		54	-0.0011024					54	0.00292261					54	0.00226088
55	0.00111128					55	0.000414696					55	-0.000367721					55	-0.000416477		55	-0.000341953		55	-0.00095793		55	-0.000775657					55	0.0030775					55	0.0013422
56	0.000302785					56	0.00112121					56	-0.00071328					56	0.000276642		56	-0.000437396		56	-0.000486542		56	-0.000198915					56	0.00289239					56	0.000283519
57	-0.000842994					57	0.000619611					57	3.23642e-05					57	0.000839951		57	0.000107735		57	0.000575157		57	-0.00113159					57	0.00188465					57	0.000396803
58	-0.000528146					58	0.000148444					58	-0.00018175					58	0.000583298		58	0.000292999		58	0.000866927		58	-0.00163414					58	0.00213862					58	0.00162054
59	0.000386703					59	0.000227277					59	-0.000245865					59	9.66445e-05		59	0.000328263		59	0.0024287		59	-0.00120669					59	0.00237258					59	0.00298428
60	-0.000378449					60	0.00096611					60	4.00204e-05					60	-0.000250009		60	0.000553528		60	0.00293047		60	-0.000109244					60	0.00184655					60	0.00343802
61	-0.000203601					61	0.000344944					61	0.000675906					61	-0.00103666		61	0.000148792		61	0.00273224		61	0.000658203					61	0.00235051					61	0.00265175
62	-0.00634649					62	-0.00475476					62	-0.00888715					62	-0.00325315		62	-0.00117512		62	0.00141436		62	-0.00699385					62	-0.000529229					62	-0.00026258
63	-0.0701784					63	-0.0677638					63	-0.0903198					63	-0.00533956		63	-0.00612867		63	-0.00335337		63	-0.0477857					63	-0.0348862					63	-0.0260361
64	-0.15844					64	-0.158983					64	-0.203242					64	-0.00519598		64	-0.00892221		64	-0.0080911		64	-0.0948776					64	-0.0819832					64	-0.0645695
65	-0.243512					65	-0.251702					65	-0.320955					65	-0.0060524		65	-0.0104258		65	-0.00968882		65	-0.139039					65	-0.12628					65	-0.102123
66	-0.319524					66	-0.337281					66	-0.434318					66	-0.00511881		66	-0.0107393		66	-0.0106665		66	-0.176741					66	-0.165367					66	-0.135196
67	-0.375204					67	-0.403559					67	-0.524439					67	-0.00191508		67	-0.0104619		67	-0.0101939		67	-0.196073					67	-0.192709					67	-0.163118
68	-0.360263					68	-0.394676					68	-0.5269					68	0.00260874		68	-0.0060138		68	-0.00702104		68	-0.175514					68	-0.183377					68	-0.163919
69	-0.308042					69	-0.341653					69	-0.479342					69	0.00612256		69	-0.00345569		69	-0.00382816		69	-0.143535					69	-0.154325					69	-0.147109
70	-0.24757					70	-0.27631					70	-0.409653					70	0.00887639		70	-0.00132759		70	-0.00141528		70	-0.110126					70	-0.121964					70	-0.123619
71	-0.190119					71	-0.210918					71	-0.331224					71	0.00754021		71	7.05206e-05		71	0.0011176		71	-0.0810072					71	-0.0912018					71	-0.0985596
72	-0.143066					72	-0.155804					72	-0.258044					72	0.00544416		72	0.00168959		72	0.00354081		72	-0.059018					72	-0.0682061					72	-0.0737184
73	-0.108112					73	-0.11564					73	-0.197324					73	0.00288823		73	0.00302981		73	0.0066444		73	-0.0437483					73	-0.0524558					73	-0.0511253
74	-0.0851574					74	-0.0909551					74	-0.153493					74	-0.0011477		74	0.00425003		74	0.00754799		74	-0.0344886					74	-0.0431255					74	-0.0314422
75	-0.0711731					75	-0.0760906					75	-0.125613					75	-0.00320363		75	0.00432025		75	0.00589159		75	-0.030369					75	-0.0387452					75	-0.0181092
76	-0.0632287					76	-0.0670461					76	-0.109112					76	-0.00312956		76	0.00302047		76	0.00389518		76	-0.0269893					76	-0.037875					76	-0.0112361
77	-0.0566632					77	-0.0620612					77	-0.098131					77	-0.0022454		77	0.00114156		77	0.00168905		77	-0.0245493					77	-0.0346119					77	-0.0083217
78	-0.0512058					78	-0.0565053					78	-0.0887489					78	-0.00128108		78	-0.00021564		78	-4.65453e-05		78	-0.0223488					78	-0.0273635					78	-0.00862483
79	-0.0464484					79	-0.0505593					79	-0.0795968					79	-0.000276757		79	-0.00104284		79	-0.000262137		79	-0.0194683					79	-0.021745					79	-0.00984795
80	-0.041881					80	-0.0446334					80	-0.0708846					80	0.000207564		80	-0.00134005		80	0.000662271		80	-0.0170678					80	-0.0179266					80	-0.0120511
81	-0.0377836					81	-0.0390275					81	-0.0636725					81	0.000941884		81	-0.00138725		81	0.00157668		81	-0.0155573					81	-0.0144681					81	-0.0123142
82	-0.0347855					82	-0.0332813					82	-0.05777					82	0.00126627		82	-0.00119379		82	0.00302129		82	-0.0145066					82	-0.00747792					82	-0.0112764
83	-0.0325252					83	-0.0295942					83	-0.0532461					83	0.000930845		83	-0.00170795		83	0.00357662		83	-0.0138752					83	8.84023e-05					83	-0.00875543
84	-0.0290148					84	-0.0261171					84	-0.0490423					84	0.000435421		84	-0.00193211		84	0.00321194		84	-0.0132339					84	0.00691473					84	-0.00853444
85	-0.0255845					85	-0.02397					85	-0.0455885					85	0.000609996		85	-0.00322628		85	0.00290727		85	-0.0119025					85	0.012331					85	-0.00704345
86	-0.0218341					86	-0.0215528					86	-0.0422847					86	0.000634572		86	-0.00261044		86	0.0023226		86	-0.0099011					86	0.0176274					86	-0.00730245
87	-0.0189235					87	-0.0193156					87	-0.0381706					87	0.000329183		87	-0.00195425		87	0.00138803		87	-0.0082896					87	0.0147345					87	-0.00591101
88	-0.0158303					88	-0.0172775					88	-0.034435					88	0.000354018		88	-0.00210492		88	0.00196438		88	-0.00762728					88	0.00765834					88	-0.00548557
89	-0.0143371					89	-0.0155994					89	-0.0311195					89	0.000658854		89	-0.00206558		89	0.00364073		89	-0.00679497					89	0.00334223					89	-0.00439012
90	-0.0139739					90	-0.0143813					90	-0.0276139					90	0.000153689		90	-0.00125624		90	0.00380708		90	-0.00575266					90	0.00149612					90	-0.00355467
91	-0.0137207					91	-0.0140532					91	-0.0241483					91	-0.000141475		91	-0.0017769		91	0.00424343		91	-0.00559034					91	0.000200008					91	-0.00247922
92	-0.0128675					92	-0.0139851					92	-0.0227128					92	0.000723364		92	-0.00175756		92	0.00367978		92	-0.00547801					92	-0.000246103					92	-0.00256378
93	-0.0123816					93	-0.0134663					93	-0.0208954					93	0.00200846		93	-0.000554337		93	0.00246723		93	-0.00519472					93	-0.000545086					93	-0.00220363
94	-0.0121356					94	-0.0119474					94	-0.020548					94	0.00288356		94	-0.000271035		94	0.000954706		94	-0.00500142					94	-0.00239393					94	-0.0015734
95	-0.0108696					95	-0.0103586					95	-0.0196907					95	0.00311866		95	-0.000107734		95	0.000272181		95	-0.00509813					95	-0.00219278					95	-0.00194317
96	-0.00899361					96	-0.00919972					96	-0.0175133					96	0.00273376		96	-0.000904432		96	-0.000720343		96	-0.00490484					96	-0.00249163					96	-0.000772933
97	-0.00820763					97	-0.00748086					97	-0.016346					97	0.00207886		97	-0.00145113		97	4.71329e-05		97	-0.00284154					97	-0.00135047					97	-0.000512699
98	-0.00767933					98	-0.00704155					98	-0.0144069					98	0.0014442		98	-0.00201401		98	0.000595669		98	-0.00107732					98	0.000906685					98	-0.00143805
99	-0.00721066					99	-0.00728217					99	-0.0120477					99	0.000609573		99	-0.00218628		99	8.4375e-05		99	-0.000442998					99	0.0024748					99	-0.00103269
100	-0.00659198					100	-0.00785278					100	-0.0106285					100	0.000864941		100	-0.00253856		100	-0.00145692		100	0.000401326					100	0.00313292					100	-0.000707339
101	-0.00606331					101	-0.0076434					101	-0.0101893					101	0.00075031		101	-0.00142083		101	-0.00104821		101	0.000355649					101	0.00350103					101	-0.00133198
102	-0.00549463					102	-0.00739402					102	-0.0085101					102	-0.00116432		102	-0.000983101		102	-0.00196951		102	-0.00188003					102	0.00349915					102	-0.00228663
103	-0.00542402					103	-0.00640441					103	-0.0081494					103	-0.00172874		103	-0.000851733		103	-0.00243981		103	-0.00420486					103	0.00298221					103	-0.00243722
104	-0.00487273					104	-0.00611472					104	-0.00721829					104	-0.0012131		104	-0.00128911		104	-0.00248977		104	-0.00537946					104	0.00397699					104	-0.00367641
105	-0.00443144					105	-0.00509504					105	-0.00685718					105	-0.00196745		105	-0.000796488		105	-0.00124973		105	-0.00627406					105	0.00375176					105	-0.0038456
106	-0.00458016					106	-0.00495535					106	-0.00672608					106	-0.00170181		106	-0.00105387		106	-0.000689694		106	-0.00565866					106	0.00354654					106	-0.00449479
107	-0.00429887					107	-0.00512567					107	-0.00675497					107	0.000113829		107	-0.00126124		107	-0.000399655		107	-0.00410325					107	0.00477131					107	-0.00393398
108	-0.003436					108	-0.00557593					108	-0.00602256					108	0.000449656		108	-0.000395184		108	0.000271282		108	-0.0013871					108	0.00604006					108	-0.00201953
109	-0.00212219					109	-0.00640617					109	-0.0059095					109	0.000215576		109	0.00101294		109	0.000652758		109	9.94248e-05					109	0.00625119					109	-0.000742905
110	-0.00172837					110	-0.00652641					110	-0.00474644					110	-0.000268504		110	0.000941059		110	0.000854234		110	0.000655952					110	0.00707232					110	-0.000266276
111	-0.00144455					111	-0.00513665					111	-0.00408339					111	-0.000332584		111	0.00140918		111	0.00035571		111	-0.00013752					111	0.00749345					111	0.000260354
112	-0.00195074					112	-0.00590689					112	-0.00360033					112	-0.000516664		112	0.0017273		112	0.00149719		112	-0.00105099					112	0.00818459					112	0.000396983
113	-0.00233568					113	-0.0056072					113	-0.00412617					113	-0.000380588		113	0.000248546		113	0.000959442		113	-0.00225382					113	0.00953878					113	0.00115678
114	-0.00257941					114	-0.00527759					114	-0.00390111					114	-0.000784385		114	-0.000607166		114	0.00175246		114	-0.00243612					114	0.010116					114	0.00330968
115	-0.00186315					115	-0.00432798					115	-0.00437604					115	-6.81812e-05		115	-0.000762878		115	0.00218548		115	-0.00195841					115	0.00893316					115	0.00531257
116	-0.00278688					116	-0.00503837					116	-0.00395098					116	0.000308022		116	-0.00111859		116	0.00187849		116	-0.000800712					116	0.00844034					116	0.00717547
117	-0.00255061					117	-0.00289875					117	-0.00301592					117	0.000144226		117	-0.000174303		117	0.000511509		117	-8.30103e-05					117	0.00684753					117	0.00930836
118	-0.00240343					118	-0.00187929					118	-0.00287997					118	-0.000329443		118	0.00165257		118	0.000465163		118	-9.47779e-05					118	0.00450695					118	0.00914381
119	-0.00289479					119	-0.000380052					119	-0.00294285					119	-0.000602945		119	0.00483351		119	0.000469824		119	-0.00109585					119	0.00346988					119	0.00850328
120	-0.00487616					120	-0.00136082					120	-0.00243573					120	-0.00111645		120	0.00543446		120	0.000254484		120	-0.00168693					120	0.00375282					120	0.00731276
121	-0.00416752					121	-0.00202158					121	-0.00254862					121	-0.00116995		121	0.00714541		121	0.00121915		121	-0.002598					121	0.00382576					121	0.00655223
122	-0.00404889					122	-0.00308234					122	-0.0030115					122	-0.00071345		122	0.00660635		122	0.00108381		122	-0.00277908					122	0.0035787					122	0.0049917
123	-0.00362964					123	-0.00342327					123	-0.00206371					123	3.31508e-05		123	0.00658897		123	0.000688934		123	-0.00261975					123	0.00324311					123	0.00427292
124	-0.00350872					124	-0.00351463					124	-0.00199449					124	0.000239972		124	0.00383615		124	-0.000414667		124	-0.00264955					124	0.0024115					124	0.00383887
125	-0.0014278					125	-0.003256					125	-0.00223526					125	0.000326792		125	0.00213333		125	-0.000328269		125	-0.00301935					125	0.00302989					125	0.00371483
126	-0.00149688					126	-0.00318737					126	-0.00165604					126	-0.000566387		126	0.0012405		126	-0.00119187		126	-0.00251916					126	0.00321827					126	0.00394078
127	-0.00110595					127	-0.00253873					127	-0.00140681					127	-0.000779566		127	0.000547682		127	-0.000695471		127	-0.00275896					127	0.00266666					127	0.00446673
128	-0.000684702					128	-0.00216022					128	-0.000987147					128	-0.00170267		128	-0.00149452		128	0.0003412		128	-0.0032485					128	0.00320583					128	0.0047436
129	-0.00116158					129	-0.00192241					129	-0.000565715					129	-0.00142548		129	-0.00265322		129	0.00100942		129	-0.00285698					129	0.00378936					129	0.0027156
130	-0.00274845					130	-0.00172461					130	-0.000364282					130	-0.000968289		130	-0.00229191		130	0.000357637		130	-0.00230546					130	0.0032829					130	-0.000642401
131	-0.00233532					131	-0.0013268					131	-0.00154285					131	-0.0011111		131	-0.00286061		131	0.000735856		131	-0.00222394					131	0.00216644					131	-0.0036704
132	-0.00256219					132	-0.00171899					132	-0.00278142					132	-0.00104391		132	-0.0035893		132	0.000594074		132	-0.00135243					132	0.00111998					132	-0.0059584
133	-0.003049					133	-0.00178122					133	-0.00381977					133	-0.000376678		133	-0.00237793		133	0.000412352		133	-0.000470793					133	7.36658e-05					133	-0.00642622
134	-0.00236375					134	-0.00158443					134	-0.00359582					134	-0.000319033		134	-0.00205451		134	0.000322466		134	-0.000297907					134	-0.000697951					134	-0.00534872
135	-0.0011585					135	-0.00161765					135	-0.00268187					135	-0.000411388		135	-0.0020311		135	0.00103258		135	-0.00093502					135	-0.00189957					135	-0.00307122
136	-0.00213325					136	-0.00122086					136	-0.00152791					136	0.000586257		136	-0.00267768		136	0.000792694		136	-0.00102213					136	-0.00107118					136	0.000646275
137	-0.002108					137	-0.000704076					137	-0.000633961					137	0.000203902		137	-0.00286426		137	0.00160281		137	-0.00188925					137	-0.0005728					137	0.00445378
138	-0.00204275					138	-0.000877291					138	0.000249992					138	-0.00100845		138	-0.00304084		138	0.00208292		138	-0.00182636					138	-0.000654417					138	0.00589128
139	-0.00203559					139	-0.00161146					139	-7.2921e-05					139	-0.00158026		139	-0.00213641		139	0.0016248		139	-0.000782103					139	-0.00043186					139	0.0048934
140	-0.00177826					140	-0.00121571					140	-0.000985726					140	-0.00111205		140	-0.00187188		140	0.000786845		140	-0.000157799					140	0.000161097					140	0.00318597
141	-0.00106092					141	-0.000939969					141	-0.00138853					141	-0.00142384		141	-0.00215735		141	0.000308892		141	0.000286505					141	-0.00129595					141	-0.000531456
142	-0.000813588					142	-0.00111423					142	-0.00108134					142	-0.000905629		142	-0.000982816		142	4.09379e-05		142	0.00013081					142	-0.00076299					142	-0.00462888
143	-0.000766253					143	-0.00159848					143	-0.00044414					143	0.000202581		143	-0.00111829		143	-0.000217016		143	-0.000384886					143	-0.000590033					143	-0.00677631
144	0.000122851					144	-0.00167342					144	0.000966613					144	0.00092139		144	-0.00152292		144	-0.000303451		144	-0.00146934					144	-0.000513523					144	-0.0053001
145	0.00181241					145	-0.00242853					145	0.00163799					145	0.000760305		145	-0.00039733		145	0.000860508		145	-0.00155357					145	-0.000766091					145	-0.00202293
146	0.00391198					146	-0.00244364					146	0.00147937					146	0.00034922		146	0.000668256		146	0.00146447		146	-0.0027478					146	0.000261342					146	0.00281424
147	0.00421154					147	-0.00124875					147	0.00192075					147	0.000658134		147	0.000363842		147	0.000448427		147	-0.00343203					147	-0.000311225					147	0.0071514
148	0.00447111					148	0.00023614					148	0.000552133					148	0.000527049		148	0.000139428		148	-0.000347614		148	-0.00303626					148	0.000866207					148	0.00848857
149	0.00450222					149	0.00113074					149	-2.27471e-05					149	0.000776585		149	-0.000204015		149	0.000257606		149	-0.00201938					149	0.00210671					149	0.00632853
150	0.00194408					150	0.00139519					150	0.000613733					150	6.63476e-05		150	-0.00054699		150	0.000443432		150	-0.00060209					150	0.00300869					150	0.00377984
151	-0.000184063					151	0.00186965					151	0.000460212					151	0.00063611		151	-8.99656e-05		151	0.000919259		151	0.000355194					151	0.00263066					151	0.000421156
152	-0.0013422					152	0.000454106					152	0.000616692					152	0.000405872		152	-0.000432941		152	0.00126509		152	0.00200248					152	0.00321264					152	-0.00152753
153	-0.00169034					153	0.000948563					153	0.00144317					153	0.000685635		153	0.000904084		153	0.00193091		153	0.00193976					153	0.00180462					153	-0.00172622
154	-0.00256737					154	0.000743024					154	0.000883262					154	0.000525994		154	0.00243213		154	0.00197773		154	0.00146801					154	-0.000111119					154	0.000497054
155	-0.0011235					155	0.00171749					155	-0.000534404					155	0.00124672		155	0.001711		155	0.00176535		155	0.000206859					155	5.49662e-05					155	0.00326189
156	0.000300369					156	0.000861953					156	-0.000732069					156	0.00214746		156	0.000929866		156	0.00161296		156	0.000505707					156	0.00102105					156	0.00468673
157	0.00167424					157	0.00106642					157	-0.00111974					157	0.00293819		157	0.00132873		157	0.00190058		157	0.000344554					157	0.00125714					157	0.00422157
158	0.00281811					158	0.000290883					158	-0.0010874					158	0.00336892		158	0.000507599		158	0.000948191		158	0.000653402					158	0.00193322					158	0.00403641
159	0.00324272					159	-0.000284525					159	-0.000721788					159	0.00279017		159	-0.00103267		159	0.00033652		159	0.00109305					159	0.00236061					159	0.00337247
160	0.0025283					160	-0.000619767					160	0.000377103					160	0.00201194		160	-0.00170184		160	-0.000504231		160	0.00110349					160	0.00135968					160	0.00156009
161	0.00101387					161	-0.00023501					161	0.00222599					161	0.00109371		161	-0.00195101		161	-0.000284983		161	0.00065393					161	0.000328739					161	-0.000502285
162	-0.000110551					162	9.97478e-05					162	0.00332488					162	-0.000334522		162	-0.000630179		162	-0.000335734		162	4.43722e-05					162	0.000597802					162	-0.000994662
163	-0.000564975					163	-7.54948e-05					163	0.00375378					163	-0.00117275		163	0.00131065		163	0.00124351		163	-0.000215186					163	0.000296866					163	-0.00163704
164	-0.000599008					164	0.000459429					164	0.00430541					164	-0.00120058		164	0.00134214		164	0.00178322		164	-0.00073415					164	0.000876348					164	-0.0014088
165	-0.0012822					165	0.00110471					165	0.00421147					165	-8.7778e-05		165	0.00185501		165	0.0015139		165	-0.00083216					165	0.00100672					165	-0.00239926
166	-0.000815401					166	0.00113998					166	0.00283753					166	0.000575028		166	0.00114789		166	0.000794586		166	-0.000880169					166	0.0013971					166	-0.00342972
167	-0.000188598					167	0.00105526					167	0.00303359					167	0.00131783		167	-0.00088923		167	0.000745268		167	1.82191e-06					167	0.000757475					167	-0.00591018
168	-0.000221795					168	0.00140054					168	0.00270965					168	0.00095064		168	-0.00311635		168	-0.000134049		168	-5.61873e-05					168	0.000247851					168	-0.00880064
169	-0.000344843					169	0.00158595					169	0.00175763					169	0.00130372		169	-0.00251305		169	-0.000173127		169	-0.00019379					169	4.80823e-05					169	-0.0123109
170	-0.000737296					170	0.0008419					170	0.00145091					170	0.00103754		170	-0.00108805		170	0.000608751		170	-0.000280274					170	-0.000142263					170	-0.0117001
171	-0.00188975					171	0.000127847					171	0.00164419					171	0.00134136		171	0.000226956		171	0.00066063		171	-0.000546757					171	-0.00123261					171	-0.00799939
172	-0.0023222					172	0.000313795					172	0.000527464					172	0.00151518		172	0.00164196		172	0.000502508		172	-0.000763241					172	-0.00237295					172	-0.00420866
173	-0.00239465					173	-0.000350258					173	-2.92573e-05					173	0.002169		173	0.00275696		173	-0.000415613		173	-9.97251e-05					173	-0.0032633					173	0.000202074
174	-0.00248707					174	-0.000494254					174	0.000475048					174	0.00190296		174	0.00364215		174	-0.00111366		174	0.00121402					174	-0.00429385					174	0.00233288
175	-0.0016791					175	0.000202377					175	0.000255171					175	0.00157773		175	0.00221945		175	-0.00128084		175	0.00184909					175	-0.00468678					175	0.00373447
176	-0.000581132					176	0.00144901					176	0.000305295					176	0.000572499		176	0.00161675		176	-0.00165803		176	0.00118416					176	-0.0046397					176	0.00318607
177	-0.00116316					177	0.000335639					177	0.000265418					177	0.000427269		177	-0.00188595		177	-0.00154522		177	0.00032923					177	-0.00423262					177	0.00141766
178	-0.00143519					178	2.26992e-06					178	0.00120554					178	0.000142039		178	-0.00511865		178	-0.000612402		178	-0.000255701					178	-0.00371554					178	-0.00238075
179	-0.00156722					179	-0.000601099					179	0.00148588					179	0.000636836		179	-0.00719135		179	0.000600412		179	-0.00106058					179	-0.00289847					179	-0.00249915
180	-0.00106891					180	-0.00197384					180	0.00218235					180	0.000722436		180	-0.00721211		180	0.0014339		180	-0.001344					180	-0.00332447					180	-0.00323697
181	-0.000880596					181	-0.00101656					181	0.00334883					181	0.000248036		181	-0.0066128		181	0.00252742		181	-0.000517416					181	-0.00253059					181	-0.00197476
182	-0.0294623					182	-0.0297893					182	-0.0249847					182	-0.00273636		182	-0.00839348		182	0.00212094		182	-0.0166408					182	-0.0193067					182	-0.0135926
183	-0.194664					183	-0.199762					183	-0.205488					183	-0.0120608		183	-0.0207942		183	-0.0113655		183	-0.117494					183	-0.109903					183	-0.0930104
184	-0.510856					184	-0.530825					184	-0.560762					184	-0.0246852		184	-0.0405048		184	-0.034002		184	-0.314518					184	-0.283959					184	-0.250028
185	-0.955617					185	-1.00332					185	-1.06959					185	-0.0381189		185	-0.0607242		185	-0.0579381		185	-0.59067					185	-0.526308					185	-0.471086
186	-1.47644					186	-1.57011					186	-1.68849					186	-0.0485326		186	-0.0767332		186	-0.0786041		186	-0.911482					186	-0.810337					186	-0.733933
187	-1.93755					187	-2.08604					187	-2.28624					187	-0.0501663		187	-0.0804923		187	-0.0916001		187	-1.18801					187	-1.05866					187	-0.978161
188	-2.19855					188	-2.39666					188	-2.6909					188	-0.03791		188	-0.0684013		188	-0.087566		188	-1.3308					188	-1.19543					188	-1.12884
189	-2.24805					189	-2.47979					189	-2.87151					189	-0.0185137		189	-0.0456904		189	-0.070622		189	-1.33033					189	-1.21254					189	-1.17585
190	-2.11532					190	-2.36076					190	-2.84584					190	0.00758301		190	-0.0180185		190	-0.0457378		190	-1.212					190	-1.1263					190	-1.13092
191	-1.85991					191	-2.10062					191	-2.66004					191	0.0314199		191	0.00811371		191	-0.0183235		191	-1.02041					191	-0.97048					191	-1.01629
192	-1.59576					192	-1.82096					192	-2.42116					192	0.0460167		192	0.0272159		192	0.0053108		192	-0.83871					192	-0.810412					192	-0.881228
193	-1.36652					193	-1.57677					193	-2.1852					193	0.0486336		193	0.0383681		193	0.0242351		193	-0.697231					193	-0.673865					193	-0.751895
194	-1.17644					194	-1.37869					194	-1.96678					194	0.0428905		194	0.0419803		194	0.0356894		194	-0.598511					194	-0.566547					194	-0.639103
195	-1.02626					195	-1.22461					195	-1.77481					195	0.0294376		195	0.0379731		195	0.0375238		195	-0.532851					195	-0.489672					195	-0.5467
196	-0.909579					196	-1.10385					196	-1.60887					196	0.0156349		196	0.0295261		196	0.0316281		196	-0.488381					196	-0.437168					196	-0.478648
197	-0.81967					197	-1.00731					197	-1.46568					197	0.00444219		197	0.0198292		197	0.0215725		197	-0.45246					197	-0.400934					197	-0.428126
198	-0.74689					198	-0.924788					198	-1.34086					198	-0.000670519		198	0.0131123		198	0.0120769		198	-0.415799					198	-0.371739					198	-0.389134
199	-0.683661					199	-0.84894					199	-1.22931					199	-7.32278e-05		199	0.00862539		199	0.00521129		199	-0.375619					199	-0.342905					199	-0.354381
200	-0.624721					200	-0.77924					200	-1.1268					200	0.00275423		200	0.00839872		200	0.00207561		200	-0.333948					200	-0.311353					200	-0.323009
201	-0.572172					201	-0.719501					201	-1.03567					201	0.00611182		201	0.0092123		201	0.00235987		201	-0.295396					201	-0.279782					201	-0.293738
202	-0.526372					202	-0.669992					202	-0.956694					202	0.00954941		202	0.0107659		202	0.00400412		202	-0.261354					202	-0.250651					202	-0.268286
203	-0.489442					203	-0.630883					203	-0.889408					203	0.012287		203	0.0115795		203	0.00557838		203	-0.236662					203	-0.22609					203	-0.246614
204	-0.459833					204	-0.597453					204	-0.834321					204	0.0132946		204	0.012733		204	0.00811264		204	-0.217931					204	-0.207109					204	-0.228192
205	-0.436363					205	-0.566884					205	-0.791702					205	0.0129422		205	0.0116767		205	0.00877677		205	-0.204538					205	-0.192289					205	-0.210521
206	-0.414283					206	-0.532704					206	-0.757862					206	0.01148		206	0.0112104		206	0.00863069		206	-0.193226					206	-0.179852					206	-0.19395
207	-0.391133					207	-0.494895					207	-0.727461					207	0.00967775		207	0.0100341		207	0.00783461		207	-0.183063					207	-0.168084					207	-0.178659
208	-0.364603					208	-0.454225					208	-0.698361					208	0.0065855		208	0.00770778		208	0.00593854		208	-0.17131					208	-0.156096					208	-0.165928
209	-0.335903					209	-0.415226					209	-0.66638					209	0.00440325		209	0.00543148		209	0.00386246		209	-0.158167					209	-0.143079					209	-0.152797
210	-0.306123					210	-0.377696					210	-0.632309					210	0.00320102		210	0.00474512		210	0.00292624		210	-0.144264					210	-0.130972					210	-0.139957
211	-0.275803					211	-0.344636					211	-0.594905					211	0.0029688		211	0.00405856		211	0.00126962		211	-0.12993					211	-0.119568					211	-0.128577
212	-0.248092					212	-0.314476					212	-0.556981					212	0.00276658		212	0.00359201		212	0.000563003		212	-0.118177					212	-0.109773					212	-0.118237
213	-0.223612					213	-0.287946					213	-0.519647					213	0.00354436		213	0.00391545		213	0.000916382		213	-0.107473					213	-0.101349					213	-0.106438
214	-0.202702					214	-0.263766					214	-0.485123					214	0.00354214		214	0.0048389		214	0.000549762		214	-0.0977991					214	-0.0946745					214	-0.0972079
215	-0.185531					215	-0.241406					215	-0.452709					215	0.0029999		215	0.00405226		215	0.000183043		215	-0.0891352					215	-0.0884206					215	-0.0900484
216	-0.170231					216	-0.221566					216	-0.422992					216	0.000897583		216	0.00335507		216	0.000465673		216	-0.0819805					216	-0.0823395					216	-0.0829501
217	-0.15598					217	-0.204736					217	-0.395556					217	0.00165526		217	0.00337788		217	-0.000831697		217	-0.0745759					217	-0.0761184					217	-0.0759718
218	-0.143509					218	-0.189426					218	-0.369969					218	0.00251294		218	0.00348069		218	-0.00127907		218	-0.0677913					218	-0.0707773					218	-0.0702635
219	-0.132939					219	-0.175816					219	-0.345842					219	0.00191062		219	0.0035535		219	-0.00134644		219	-0.0626266					219	-0.0658362					219	-0.0639552
220	-0.121368					220	-0.164816					220	-0.321476					220	0.00160828		220	0.00405629		220	-0.000813818		220	-0.0581919					220	-0.0620152					220	-0.0585469
221	-0.110787					221	-0.153755					221	-0.298847					221	0.00175572		221	0.00386809		221	-0.00116215		221	-0.0525865					221	-0.0577374					221	-0.0523403
222	-0.101936					222	-0.143975					222	-0.276668					222	-0.000156838		222	0.00315988		222	0.000169527		222	-0.0487111					222	-0.0548796					222	-0.0470838
223	-0.0935252					223	-0.135735					223	-0.255949					223	-0.0016594		223	0.00237168		223	-0.0008388		223	-0.0452356					223	-0.0519318					223	-0.0427172
224	-0.0851743					224	-0.127914					224	-0.23713					224	-0.00213195		224	0.00152347		224	-0.00168713		224	-0.0416702					224	-0.0483341					224	-0.0388306
225	-0.0788433					225	-0.119324					225	-0.221011					225	-0.00253451		225	0.00154527		225	-0.00222545		225	-0.0383848					225	-0.0443363					225	-0.0362741
226	-0.0739721					226	-0.111504					226	-0.205441					226	-0.00195743		226	0.00152582		226	-0.00227482		226	-0.0369187					226	-0.0414914					226	-0.0353493
227	-0.0687908					227	-0.104613					227	-0.19223					227	-0.000830358		227	0.00161622		227	-0.00341431		227	-0.0340325					227	-0.0386569					227	-0.0338247
228	-0.0641496					228	-0.097323					228	-0.18018					228	-0.000893284		228	0.00314663		228	-0.00322381		228	-0.0319264					228	-0.0360624					228	-0.0309802
229	-0.0592283					229	-0.0911426					229	-0.170139					229	-0.00135621		229	0.00309703		229	-0.0030533		229	-0.0309203					229	-0.034418					229	-0.0290156
230	-0.054347					230	-0.0862022					230	-0.160789					230	-0.000289138		230	0.00267743		230	-0.00344279		230	-0.0286342					230	-0.0326535					230	-0.0277811
231	-0.0518955					231	-0.0820818					231	-0.152307					231	0.000357499		231	0.00203646		231	-0.00411335		231	-0.0261175					231	-0.0306115					231	-0.0265283
232	-0.0489439					232	-0.0768514					232	-0.143855					232	-0.000415931		232	0.00219509		232	-0.00281421		232	-0.0238308					232	-0.0276204					232	-0.0255461
233	-0.0467924					233	-0.0724809					233	-0.133563					233	-0.00111936		233	0.00113372		233	-0.00129507		233	-0.0214241					233	-0.0247992					233	-0.0241139
234	-0.0445608					234	-0.0685505					234	-0.116652					234	-0.000562791		234	0.00158236		234	-5.93917e-06		234	-0.0184274					234	-0.023448					234	-0.0213416
235	-0.0423592					235	-0.0653001					235	-0.0983698					235	-0.00102622		235	0.00235099		235	-0.000196804		235	-0.0165406					235	-0.0222368					235	-0.0170594
236	-0.0394574					236	-0.0611696					236	-0.0830775					236	-0.00128013		236	0.00317821		236	-0.000458705		236	-0.0156835					236	-0.0213878					236	-0.0136988
237	-0.0380656					237	-0.0581192					237	-0.071285					237	-0.00101419		237	0.00434469		237	-0.00153115		237	-0.0153863					237	-0.02082					237	-0.0111692
238	-0.0355237					238	-0.0546288					238	-0.0642225					238	-0.00098826		238	0.00466117		238	-0.00244359		238	-0.014959					238	-0.0211421					238	-0.0101296
239	-0.0337318					239	-0.0508384					239	-0.06517					239	-0.00186233		239	0.00435766		239	-0.00284604		239	-0.0135418					239	-0.0194342					239	-0.0114299
240	-0.0315599					240	-0.046988					240	-0.0700874					240	-0.00237639		240	0.00325414		240	-0.00262848		240	-0.0129846					240	-0.0175264					240	-0.0135303
241	-0.0291579					241	-0.0429876					241	-0.0739148					241	-0.00263095		241	0.00286926		241	-0.00158189		241	-0.0114571					241	-0.0154203					241	-0.0140122
242	-0.0271557					242	-0.0402172					242	-0.0760221					242	-0.00295578		242	0.00216322		242	-0.00121612		242	-0.0105194					242	-0.0141358					242	-0.0150555
243	-0.0265535					243	-0.0380069					243	-0.0771994					243	-0.00278062		243	0.00153717		243	-0.00106035		243	-0.00895173					243	-0.0126812					243	-0.0161988
244	-0.0257213					244	-0.0360966					244	-0.0763767					244	-0.00232545		244	0.00118113		244	-0.00102458		244	-0.00843407					244	-0.0120867					244	-0.016182
245	-0.0252791					245	-0.0342462					245	-0.074104					245	-0.00213029		245	0.00220508		245	3.11851e-05		245	-0.00806641					245	-0.0128622					245	-0.0144653
246	-0.0237468					246	-0.0331959					246	-0.0713914					246	-0.00234559		246	0.00365782		246	-0.00065388		246	-0.00917858					246	-0.013969					246	-0.0131699
247	-0.0214044					247	-0.0304457					247	-0.068059					247	-0.00250132		247	0.00311887		247	-0.000680101		247	-0.00975058					247	-0.0139678					247	-0.00944634
248	-0.0192519					248	-0.0278955					248	-0.0653066					248	-0.00307705		248	0.00419992		248	-0.00107632		248	-0.00984259					248	-0.0132866					248	-0.00583279
249	-0.0180894					249	-0.0263453					249	-0.0634042					249	-0.00292278		249	0.00534097		249	-0.000572544		249	-0.00979459					249	-0.0130554					249	-0.00185924
250	-0.0170269					250	-0.0244051					250	-0.0622318					250	-0.00305851		250	0.00524202		250	-0.00112876		250	-0.0101666					250	-0.0107642					250	0.000704305
251	-0.0164944					251	-0.023295					251	-0.0593598					251	-0.00303462		251	0.00543208		251	7.43647e-05		251	-0.00863851					251	-0.00964404					251	0.000826808
252	-0.0168716					252	-0.022535					252	-0.0570182					252	-0.0030913		252	0.00669985		252	-0.000234021		252	-0.00765028					252	-0.00888618					252	-0.00115313
253	-0.0171288					253	-0.021415					253	-0.0535166					253	-0.00180798		253	0.00627761		253	-0.000432406		253	-0.00695204					253	-0.00830833					253	-0.00240306
254	-0.016696					254	-0.019215					254	-0.0507451					254	-0.00140466		254	0.00554538		254	-0.00173079		254	-0.00545381					254	-0.00688048					254	-0.00529299
255	-0.0155433					255	-0.018085					255	-0.0475735					255	-0.00136133		255	0.00413314		255	-0.00209918		255	-0.00383557					255	-0.00606262					255	-0.00736293
256	-0.0151204					256	-0.017135					256	-0.0456523					256	-0.000398265		256	0.00163025		256	-0.00255798		256	-0.00398729					256	-0.00481538					256	-0.00728355
257	-0.0142674					257	-0.0157153					257	-0.0447321					257	0.000754164		257	0.000194348		257	-0.00144866		257	-0.00394891					257	-0.00484088					257	-0.00581725
258	-0.0127743					258	-0.0151655					258	-0.0444519					258	0.00100659		258	-6.15493e-05		258	-0.000679338		258	-0.00407052					258	-0.00472638					258	-0.00448096
259	-0.0109612					259	-0.0143458					259	-0.0446316					259	0.000799021		259	0.000412554		259	0.000379981		259	-0.00519214					259	-0.00611188					259	-0.00311467
260	-0.0105682					260	-0.013016					260	-0.0438814					260	0.00092145		260	0.00220666		260	0.000139301		260	-0.00591376					260	-0.00690738					260	-0.00282838
261	-0.0105551					261	-0.0111863					261	-0.0440115					261	0.000533744		261	0.00371051		261	-0.000521527		261	-0.00600536					261	-0.00668309					261	-0.00276234
262	-0.0109818					262	-0.0103769					262	-0.0425031					262	0.000195364		262	0.00366057		262	-0.00112457		262	-0.00568692					262	-0.00562195					262	-0.00302012
263	-0.0114584					263	-0.00902748					263	-0.0405047					263	-0.000803016		263	0.00335063		263	-0.00109761		263	-0.00606847					263	-0.00501082					263	-0.00270789
264	-0.0113551					264	-0.00829806					264	-0.0378363					264	0.000468604		264	0.00217069		264	-0.000710654		264	-0.00582003					264	-0.00352968					264	-0.000905666
265	-0.0105917					265	-0.00812864					265	-0.035548					265	0.000960224		265	0.000350755		265	-0.0011437		265	-0.00443159					265	-0.00220854					265	0.000186559
266	-0.00908836					266	-0.00837921					266	-0.0339097					266	0.000741806		266	-0.000569183		266	-0.00142674		266	-0.00361315					266	-0.00173741					266	0.00148878
267	-0.00769474					267	-0.00778015					267	-0.0323437					267	0.000122683		267	-0.00112329		267	-0.00236203		267	-0.00358474					267	-0.00243945					267	0.0014069
268	-0.00614111					268	-0.00734111					268	-0.0322077					268	0.00106356		268	-0.00122765		268	-0.00298746		268	-0.00308632					268	-0.00289169					268	8.47626e-05
269	-0.00584748					269	-0.00739207					269	-0.0325717					269	0.000104437		269	0.000507994		269	-0.00348289		269	-0.00230791					269	-0.00329392					269	-0.00182737
270	-0.00500385					270	-0.00682303					270	-0.0321157					270	3.53141e-05		270	0.00161364		270	-0.00208832		270	-0.0024795					270	-0.00444615					270	-0.0028495
271	-0.00490022					271	-0.00575399					271	-0.0308396					271	0.000336191		271	0.00270928		271	-0.00126374		271	-0.00282109					271	-0.00483839					271	-0.00305164
272	-0.00444636					272	-0.00513532					272	-0.0293263					272	0.00070642		272	0.00358097		272	-0.000281082		272	-0.0027028					272	-0.00415341					272	-0.00128759
273	-0.00409245					273	-0.00470672					273	-0.0270532					273	-0.000443398		273	0.00398181		273	0.000641175		273	-0.00272451					273	-0.00401903					273	0.000625658
274	-0.00431854					274	-0.00445812					274	-0.02514					274	-0.00177322		274	0.00237266		274	0.00153343		274	-0.00284622					274	-0.00343464					274	0.000518902
275	-0.00557463					275	-0.00413953					275	-0.0241969					275	-0.00146303		275	0.0020935		275	0.00129569		275	-0.00354793					275	-0.00216026					275	-0.00105785
276	-0.00579072					276	-0.00443093					276	-0.0226638					276	-0.000912852		276	0.000554348		276	0.00211795		276	-0.00250964					276	-0.00169587					276	-0.00376461
277	-0.00515662					277	-0.00502269					277	-0.0219434					277	-0.0012332		277	1.15409e-05		277	0.00188865		277	-0.000811531					277	-0.00221388					277	-0.00593476
278	-0.00588243					278	-0.00541459					278	-0.0209337					278	-1.36586e-05		278	-0.000572786		278	0.000928706		278	-0.000183458					278	-0.00185288					278	-0.00744631
279	-0.00476825					279	-0.0040765					279	-0.0196539					279	0.00120588		279	-0.000677112		279	-0.000561236		279	-0.000885384					279	-0.00168189					279	-0.00704787
280	-0.00328406					280	-0.0031084					280	-0.0180742					280	0.00157542		280	-0.00108144		280	-0.000451179		280	-0.000407311					280	-0.00201089					280	-0.00602943
281	-0.00241988					281	-0.00164031					281	-0.0183444					281	0.00151495		281	-0.00120577		281	-0.000511121		281	-0.000989237					281	-0.00257989					281	-0.00439098
282	-0.00290554					282	-0.00131254					282	-0.0179874					282	0.00143409		282	-0.00132328		282	-0.000432312		282	-0.00110137					282	-0.00257089					282	-0.00223533
283	-0.00221108					283	-0.000895012					283	-0.0172316					283	0.000383044		283	-0.000643037		283	-0.000284381		283	-0.00134358					283	-0.0028133					283	-0.00170164
284	-0.00186663					284	-0.00101748					284	-0.0163957					284	-0.000327999		284	-0.000632792		284	8.35514e-05		284	-0.000725802					284	-0.0028957					284	-0.00188795
285	-0.00258217					285	-0.00181995					285	-0.0161499					285	-0.00202904		285	-0.000182548		285	-0.000478517		285	-0.000518019					285	-0.0035481					285	-0.000764253
286	-0.00327772					286	-0.00224242					286	-0.014584					286	-0.00359008		286	0.000727697		286	-0.000810585		286	-0.000390237					286	-0.0026405					286	-2.05602e-05
287	-0.00357314					287	-0.00145518					287	-0.0138808					287	-0.00341143		287	0.000465404		287	-0.000543612		287	-0.00101261					287	-0.0018045					287	0.000281033
288	-0.00396841					288	-0.000928272					288	-0.0135994					288	-0.002543		288	0.000130235		288	0.000132273		288	0.0011049					288	-0.000830309					288	0.00137025
289	-0.00491369					289	-0.00161136					289	-0.0130279					289	-0.00154456		289	0.000685065		289	0.000568158		289	0.000992419					289	-0.000996118					289	0.00243946
290	-0.00482897					290	-0.000704458					290	-0.0127665					290	-0.000736129		290	-0.000160104		290	0.000754044		290	0.00118993					290	-0.00188193					290	0.00210867
291	-0.00354425					291	-0.00018755					291	-0.0119651					291	0.00116231		291	-0.000765273		291	9.99287e-05		291	0.00139745					291	-0.00317774					291	0.00140788
292	-0.00140943					292	0.000119117					292	-0.011726					292	0.000970551		292	-0.000142323		292	-0.000294872		292	0.00202486					292	-0.00360474					292	-4.43728e-05
293	-4.44532e-06					293	-7.466e-05					293	-0.0107395					293	0.00063858		293	0.000187131		293	0.000159055		293	-0.000157859					293	-0.00383396					293	-0.00179936
294	4.05404e-05					294	-0.000418437					294	-0.010583					294	0.000706609		294	-0.00104341		294	-0.000547019		294	0.000499426					294	-0.00314319					294	-0.00199435
295	0.000295526					295	-0.00109221					295	-0.00938646					295	0.000674639		295	-0.00126396		295	-8.30931e-05		295	0.000226711					295	-0.00204241					295	-0.00117934
296	0.00113051					296	-0.00122599					296	-0.00878996					296	-2.73322e-05		296	-0.00210451		296	0.000450833		296	-0.000426005					296	-0.00201164					296	-0.000224325
297	0.00102555					297	-0.00100993					297	-0.00776533					297	-0.0001394		297	-0.00176625		297	0.00187433		297	-0.000588832					297	-0.00126164					297	0.000779776
298	0.000960785					298	-0.000554421					298	-0.00785415					298	-0.000151647		298	-0.00276199		298	0.00250637		298	0.000568132					298	-0.00149423					298	0.00246085
299	0.00211602					299	0.000501092					299	-0.00721297					299	-0.000733895		299	-0.00153773		299	0.00284842		299	0.000385096					299	-0.000726815					299	0.00293193
300	0.00359125					300	0.000696604					300	-0.00670179					300	-1.61422e-05		300	-0.000153463		300	0.00238047		300	0.00048206					300	-0.000559403					300	0.002493
301	0.00390648					301	0.00117212					301	-0.00530061					301	0.00037161		301	0.0007808		301	0.00244252		301	0.00186902					301	0.000408009					301	0.00308407
302	-0.0158083					302	-0.0190424					302	-0.0264307					302	-0.00160067		302	-0.00109547		302	0.000224366		302	-0.0143241					302	-0.00477493					302	0.000694737
303	-0.134583					303	-0.141728					303	-0.138205					303	-0.0102131		303	-0.0105359		303	-0.0106654		303	-0.101048					303	-0.0618906					303	-0.0419678
304	-0.364567					304	-0.381363					304	-0.348459					304	-0.0215355		304	-0.0271963		304	-0.0266252		304	-0.261901					304	-0.187786					304	-0.14076
305	-0.688422					305	-0.720658					305	-0.642693					305	-0.0353479		305	-0.0469868		305	-0.0457649		305	-0.485464					305	-0.369862					305	-0.284703
306	-1.06702					306	-1.12216					306	-0.989277					306	-0.0462603		306	-0.0652572		306	-0.0654247		306	-0.739988					306	-0.591278					306	-0.461676
307	-1.39909					307	-1.48137					307	-1.29994					307	-0.0476427		307	-0.0739876		307	-0.0761044		307	-0.946341					307	-0.798343					307	-0.635678
308	-1.57826					308	-1.68435					308	-1.48634					308	-0.0359652		308	-0.0679122		308	-0.0724759		308	-1.03743					308	-0.920692					308	-0.748944
309	-1.5955					309	-1.71817					309	-1.53872					309	-0.0162976		309	-0.0500168		309	-0.0568874		309	-1.0135					309	-0.944941					309	-0.78326
310	-1.47735					310	-1.60807					310	-1.47389					310	0.00929996		310	-0.0233314		310	-0.031909		310	-0.891463					310	-0.884529					310	-0.750336
311	-1.27009					311	-1.40017					311	-1.32853					311	0.0327275		311	0.006044		311	-0.00343046		311	-0.717657					311	-0.760978					311	-0.666862
312	-1.06268					312	-1.18746					312	-1.17196					312	0.0454651		312	0.0265394		312	0.018108		312	-0.566851					312	-0.628496					312	-0.565878
313	-0.890118					313	-1.01078					313	-1.03095					313	0.0470727		313	0.0389617		313	0.0332451		313	-0.459176					313	-0.515397					313	-0.472167
314	-0.757513					314	-0.873869					314	-0.911317					314	0.0403603		314	0.0422834		314	0.0390219		314	-0.392851					314	-0.425728					314	-0.393536
315	-0.658997					315	-0.771396					315	-0.814711					315	0.027028		315	0.0366452		315	0.0351887		315	-0.359715					315	-0.361069					315	-0.329215
316	-0.586941					316	-0.696392					316	-0.736755					316	0.0125456		316	0.026547		316	0.0261155		316	-0.34347					316	-0.31756					316	-0.278194
317	-0.533196					317	-0.637778					317	-0.673249					317	0.00264324		317	0.0163488		317	0.0156723		317	-0.328304					317	-0.287651					317	-0.242163
318	-0.49019					318	-0.585405					318	-0.616888					318	-0.00227895		318	0.00835829		318	0.00667787		318	-0.30643					318	-0.264424					318	-0.219724
319	-0.451225					319	-0.534422					319	-0.565647					319	-0.00199112		319	0.00534701		319	0.00106305		319	-0.275815					319	-0.242728					319	-0.201246
320	-0.414099					320	-0.485038					320	-0.518806					320	0.00136672		320	0.00529573		320	-0.000311758		320	-0.24226					320	-0.218331					320	-0.186778
321	-0.381214					321	-0.439435					321	-0.475365					321	0.00503455		321	0.00584445		321	0.00348343		321	-0.210776					321	-0.192304					321	-0.17363
322	-0.352678					322	-0.400662					322	-0.436564					322	0.00770238		322	0.00780317		322	0.00577862		322	-0.185301					322	-0.168338					322	-0.161231
323	-0.328513					323	-0.371469					323	-0.404397					323	0.0102405		323	0.00997027		323	0.00698281		323	-0.166437					323	-0.148653					323	-0.147375
324	-0.308447					324	-0.350706					324	-0.378141					324	0.0107086		324	0.0111265		324	0.00860644		324	-0.153273					324	-0.133758					324	-0.134979
325	-0.291392					325	-0.334293					325	-0.356205					325	0.0103468		325	0.0121627		325	0.00868007		325	-0.144049					325	-0.123393					325	-0.124034
326	-0.273967					326	-0.317371					326	-0.340059					326	0.0105649		326	0.0130688		326	0.0056437		326	-0.135365					326	-0.115239					326	-0.115278
327	-0.256021					327	-0.299818					327	-0.327103					327	0.0104731		327	0.011915		327	0.00447733		327	-0.126411					327	-0.109034					327	-0.107092
328	-0.237226					328	-0.280495					328	-0.314049					328	0.00813148		328	0.0103402		328	0.00413019		328	-0.117498					328	-0.10343					328	-0.097808
329	-0.217461					329	-0.259463					329	-0.299798					329	0.00634007		329	0.0076644		329	0.00320232		329	-0.107725					329	-0.0968475					329	-0.0902946
330	-0.196586					330	-0.23769					330	-0.283726					330	0.00575865		330	0.0050786		330	0.00248446		330	-0.0964622					330	-0.0896046					330	-0.0837513
331	-0.17772					331	-0.218848					331	-0.266225					331	0.00448723		331	0.0040528		331	0.00139659		331	-0.0859392					331	-0.0838417					331	-0.0777879
332	-0.160305					332	-0.201055					332	-0.247763					332	0.00382582		332	0.00403701		332	0.000808728		332	-0.0768362					332	-0.0778488					332	-0.0722346
333	-0.1452					333	-0.184193					333	-0.230354					333	0.0040447		333	0.00331063		333	0.000450291		333	-0.0676738					333	-0.0722665					333	-0.067742
334	-0.133975					334	-0.169391					334	-0.214587					334	0.00390383		334	0.00356339		334	0.000850995		334	-0.0615719					334	-0.066775					334	-0.0607506
335	-0.12428					335	-0.156139					335	-0.20047					335	0.00301297		335	0.00358615		335	0.0017717		335	-0.0574299					335	-0.0625236					335	-0.0532192
336	-0.114915					336	-0.144606					336	-0.186803					336	0.00264211		336	0.00249891		336	0.0028924		336	-0.053668					336	-0.0583521					336	-0.0454378
337	-0.10486					337	-0.133974					337	-0.174246					337	0.00232125		337	0.00187167		337	0.00251311		337	-0.049446					337	-0.0544707					337	-0.0379164
338	-0.0964155					338	-0.124322					338	-0.16294					338	0.00265066		338	0.000854173		338	0.00189343		338	-0.0462545					338	-0.0505796					338	-0.0322255
339	-0.0876809					339	-0.11469					339	-0.152178					339	0.00273047		339	-0.00032397		339	0.000172763		339	-0.0426737					339	-0.0480093					339	-0.0284158
340	-0.0803963					340	-0.106788					340	-0.141285					340	0.00180028		340	-0.000792113		340	-0.000577901		340	-0.0393029					340	-0.044859					340	-0.0266961
341	-0.0748317					341	-0.0985462					341	-0.131042					341	0.000900092		341	-0.00149026		341	-0.000988566		341	-0.034522					341	-0.0414687					341	-0.0251964
342	-0.0717671					342	-0.0921543					342	-0.121439					342	-0.000360098		342	-0.0017184		342	-0.00079923		342	-0.0311812					342	-0.0385584					342	-0.0243067
343	-0.0679826					343	-0.0856723					343	-0.111888					343	-0.00118005		343	-0.0015266		343	-0.000670106		343	-0.0277607					343	-0.0361982					343	-0.0241372
344	-0.0639684					344	-0.0801206					344	-0.103159					344	-0.000829451		344	-0.000535102		344	-0.000432075		344	-0.0246411					344	-0.0336288					344	-0.0254389
345	-0.0602742					345	-0.0754588					345	-0.0954107					345	-9.88502e-05		345	-0.000233605		345	5.95519e-06		345	-0.0213414					345	-0.0309694					345	-0.0248706
346	-0.0564601					346	-0.072277					346	-0.0890121					346	0.00017175		346	0.000287893		346	-9.60142e-05		346	-0.0206018					346	-0.02807					346	-0.0244623
347	-0.0518259					347	-0.0672952					347	-0.0836335					347	0.000242351		347	0.000139391		347	0.000252016		347	-0.0186922					347	-0.0253105					347	-0.024074
348	-0.0481417					348	-0.0630235					348	-0.0790857					348	-1.6882e-05		348	0.000420897		348	0.000439993		348	-0.0175028					348	-0.0232711					348	-0.0222358
349	-0.044088					349	-0.0593118					349	-0.0746111					349	-0.000525372		349	-0.000177422		349	0.000926781		349	-0.0161644					349	-0.0208423					349	-0.0172586
350	-0.0408443					350	-0.0547401					350	-0.0708866					350	-0.00102386		350	-0.00107574		350	0.00094357		350	-0.0138661					350	-0.0194135					350	-0.0142914
351	-0.0378906					351	-0.0494884					351	-0.0671921					351	-0.000962352		351	-0.00127406		351	0.00154036		351	-0.0128478					351	-0.0188747					351	-0.0129843
352	-0.0367769					352	-0.0462768					352	-0.0627075					352	-0.000470842		352	-0.00126238		352	0.00144715		352	-0.0134594					352	-0.0192858					352	-0.0124871
353	-0.0358032					353	-0.0436151					353	-0.0589333					353	4.07361e-05		353	-0.0015407		353	0.000983935		353	-0.0133112					353	-0.017677					353	-0.0102599
354	-0.0345701					354	-0.0406035					354	-0.0550826					354	0.000343274		354	-0.000278346		354	0.00126963		354	-0.0125543					354	-0.0170385					354	-0.0104835
355	-0.0335769					355	-0.0374519					355	-0.051822					355	0.00108581		355	0.00107406		355	0.000675242		355	-0.0127073					355	-0.01598					355	-0.00860718
356	-0.0318438					356	-0.0347102					356	-0.0489614					356	0.00018835		356	0.00217647		356	-5.91493e-05		356	-0.0117204					356	-0.0155415					356	-0.00743085
357	-0.0290807					357	-0.0311486					357	-0.0473508					357	-0.000189112		357	0.00235887		357	-0.00021354		357	-0.00948348					357	-0.014283					357	-0.00471452
358	-0.0270375					358	-0.027707					358	-0.0424801					358	-6.65741e-05		358	0.00250128		358	0.000672069		358	-0.00808654					358	-0.0140244					358	-0.00421819
359	-0.0262049					359	-0.0247853					359	-0.0279031					359	-0.000172947		359	0.00113471		359	0.000466774		359	-0.00773104					359	-0.013346					359	-0.00346231
360	-0.0248124					360	-0.0229137					360	-0.00929626					360	0.000310737		360	-1.61403e-06		360	0.000211261		360	-0.0082856					360	-0.0124775					360	-0.00307654
361	-0.0244799					361	-0.0224521					361	0.00731059					361	0.00114442		361	-0.00127794		361	0.000205749		361	-0.00780017					361	-0.011339					361	-0.000430772
362	-0.0241374					362	-0.0218504					362	0.0216874					362	0.00181811		362	-0.00125426		362	0.000290236		362	-0.00810473					362	-0.0100105					362	0.001145
363	-0.0237949					363	-0.0197988					363	0.0285643					363	0.00186179		363	-0.000290589		363	-0.000965276		363	-0.0078493					363	-0.00960206					363	0.00184077
364	-0.0222729					364	-0.0193171					364	0.0213181					364	0.00104652		364	2.43316e-05		364	-0.00125153		364	-0.0071452					364	-0.00926341					364	0.00253634
365	-0.0220312					365	-0.0186554					365	0.00833132					365	-8.85454e-05		365	0.00108982		365	-0.00120811		365	-0.00619136					365	-0.00893469					365	0.00228183
366	-0.0202894					366	-0.0167036					366	-0.00243547					366	-0.000383609		366	0.0019453		366	-0.0010547		366	-0.00609752					366	-0.00786596					366	0.000897321
367	-0.0188676					367	-0.0149819					367	-0.0108123					367	-0.000398673		367	0.00201079		367	-0.000601281		367	-0.00585368					367	-0.00675724					367	-0.00062719
368	-0.0169558					368	-0.0147202					368	-0.015819					368	-0.00105374		368	0.00117628		368	-0.000567865		368	-0.00553984					368	-0.00571852					368	-0.0022817
369	-0.0171545					369	-0.0131684					369	-0.0161683					369	-0.000507848		369	0.0008531		369	-0.000665016		369	-0.00592722					369	-0.00475949					369	-0.0032062
370	-0.0158635					370	-0.0123866					370	-0.0159686					370	0.000238418		370	0.00052094		370	-0.000332597		370	-0.00584507					370	-0.00471024					370	-0.0036907
371	-0.0162625					371	-0.0114247					371	-0.0161189					371	0.000174684		371	-0.000411221		371	-0.000720177		371	-0.00467293					371	-0.00549099					371	-0.0036152
372	-0.0171415					372	-0.0114728					372	-0.0160792					372	0.00044095		372	-0.00104338		372	-0.000827757		372	-0.00345078					372	-0.00632174					372	-0.00368969
373	-0.0173105					373	-0.011271					373	-0.0148095					373	0.00169722		373	-0.00125554		373	-0.000345337		373	-0.00294864					373	-0.00658249					373	-0.00207419
374	-0.0162299					374	-0.011329					374	-0.0147718					374	0.00188433		374	-0.00126638		374	0.000526686		374	-0.00221757					374	-0.00715288					374	-0.00301849
375	-0.0161498					375	-0.00984698					375	-0.0152254					375	0.001212		375	-0.0010856		375	0.000528224		375	-0.00163721					375	-0.00795282					375	-0.00525255
376	-0.0162096					376	-0.00952493					376	-0.0148091					376	0.00184967		376	-0.000284825		376	0.000989761		376	-0.00231686					376	-0.00684276					376	-0.00750661
377	-0.0139695					377	-0.00928287					377	-0.0137427					377	0.00117734		377	5.95259e-06		377	0.000961299		377	-0.00197651					377	-0.0064427					377	-0.00795067
378	-0.0128094					378	-0.00885081					378	-0.0132764					378	0.00104501		378	0.00044673		378	0.000952837		378	-0.00139615					378	-0.00603264					378	-0.00756473
379	-0.0128495					379	-0.00879867					379	-0.0135916					379	0.00144338		379	0.00134873		379	0.000304119		379	-0.00105671					379	-0.00609222					379	-0.00478842
380	-0.0125403					380	-0.00895635					380	-0.0119185					380	0.00175249		380	0.0010432		380	0.000824884		380	-0.00108823					380	-0.00496107					380	-0.00184136
381	-0.0122611					381	-0.00840403					381	-0.0113353					381	0.0015116		381	0.000557667		381	0.00058565		381	-0.000649761					381	-0.00506992					381	0.0022157
382	-0.0144419					382	-0.00732171					382	-0.0114022					382	0.000820709		382	0.000942135		382	0.000906415		382	-0.000971288					382	-0.00388877					382	0.00419276
383	-0.0154427					383	-0.00625939					383	-0.0120891					383	0.000119819		383	0.000786603		383	0.00114718		383	-0.00172281					383	-0.00371763					383	0.00376982
384	-0.0136337					384	-0.005147					384	-0.0113571					384	-0.000520553		384	-0.000638011		384	0.0010178		384	-0.00183503					384	-0.00229619					384	0.00347731
385	-0.0116356					385	-0.00608436					385	-0.0113071					385	-0.000780027		385	-0.000549227		385	0.000547858		385	-0.00204842					385	-0.00123367					385	0.00362637
386	-0.00959736					386	-0.00624172					386	-0.012177					386	-0.000189502		386	-0.00100044		386	0.000447919		386	-0.00170182					386	-0.00152115					386	0.00247544
387	-0.00707917					387	-0.00607907					387	-0.011627					387	0.00106102		387	-0.000981658		387	-0.000522019		387	-0.00159521					387	-0.00203863					387	0.000394502
388	-0.00527098					388	-0.00573643					388	-0.0107469					388	7.15484e-05		388	-0.000402874		388	-0.000331957		388	-0.000778604					388	-0.00132611					388	0.000493566
389	-0.00605289					389	-0.00647375					389	-0.0102376					389	0.000172418		389	0.00170637		389	0.000318042		389	0.000387597					389	-0.00149344					389	-7.11012e-06
390	-0.00548579					390	-0.00476072					390	-0.00912055					390	-1.56807e-05		390	0.00276003		390	-5.25646e-05		390	0.00153258					390	-0.00156927					390	-0.000525273
391	-0.00454868					391	-0.00456769					391	-0.00730346					391	-0.000753779		391	0.00380369		391	5.68291e-05		391	0.00148757					391	-0.000345099					391	-0.000563437
392	-0.00483157					392	-0.00442467					392	-0.00673637					392	-0.000951878		392	0.00392735		392	0.00125622		392	0.000982553					392	0.000129072					392	0.0006584
393	-0.00503447					393	-0.00494164					393	-0.00564928					393	-0.000249976		393	0.00317101		393	0.000645617		393	0.000387539					393	-6.75842e-06					393	0.000860237
394	-0.00467736					394	-0.00432861					394	-0.00504257					394	-0.000487896		394	0.00161467		394	0.00065501		394	-0.000927653					394	0.000637412					394	0.00169207
395	-0.00583138					395	-0.00454515					395	-0.0048783					395	-8.46525e-05		395	0.00015313		395	0.000723774		395	-0.000293998					395	0.000983465					395	0.00291731
396	-0.00723543					396	-0.00394167					396	-0.00368402					396	0.000168591		396	-0.000638283		396	0.000172521		396	0.00109966					396	-0.000590433					396	0.00199264
397	-0.00763949					397	-0.0028682					397	-0.00298975					397	0.000581834		397	-0.0016197		397	-0.00106873		397	0.00208331					397	-0.00135433					397	0.00149796
398	-0.00654354					398	-0.00233472					398	-0.00278548					398	0.000865077		398	-0.00207111		398	-0.00118998		398	0.00259697					398	-0.00198823					398	0.00250329
399	-0.00611759					399	-0.00197125					399	-0.00253125					399	0.000628342		399	-0.00210252		399	-0.00167124		399	0.0025606					399	-0.00276213					399	0.00336861
400	-0.0063627					400	-0.00188734					400	-0.00178965					400	0.000832896		400	-0.00153007		400	-0.000743035		400	0.000843081					400	-0.00297403					400	0.00559746
401	-0.00588798					401	-0.00217335					401	-0.00206805					401	0.000477451		401	-0.00123697		401	0.000605076		401	-0.000274438					401	-0.00134559					401	0.00786689
402	-0.00388327					402	-0.00338937					402	-0.00209646					402	0.000452006		402	-0.000423861		402	0.00174319		402	-0.000551958					402	-0.000367156					402	0.00922633
403	-0.00434855					403	-0.00341539					403	-0.00206486					403	0.00040656		403	0.000299243		403	0.0018313		403	-0.000159477					403	0.00045128					403	0.00793576
404	-0.00375384					404	-0.0026114					404	-0.00191326					404	0.000771115		404	0.00112235		404	0.00132941		404	0.001573					404	0.000129715					404	0.0055452
405	-0.00287008					405	-0.001617					405	-0.00216395					405	-7.31954e-05		405	0.000578752		405	-9.29349e-05		405	0.0010744					405	-0.000289416					405	0.00182792
406	-0.00226668					406	-0.000832448					406	-0.00169489					406	-0.000717379		406	0.000446332		406	-0.000645443		406	0.000825668					406	-0.000367682					406	-1.81847e-05
407	-0.00349327					407	-0.00129789					407	-0.00148582					407	-0.00128156		407	-3.60882e-05		407	-0.00152795		407	2.6939e-05					407	-4.59472e-05					407	-0.00180429
408	-0.00308986					408	-0.00141334					408	-0.000686763					408	-0.000565748		408	-0.000698508		408	-0.00108046		408	-0.00139179					408	0.000705787					408	-0.000560398
409	-0.00275645					409	-0.00223879					409	2.29789e-06					409	-0.000389932		409	-0.000980928		409	-0.000132966		409	-0.00319052					409	0.00182752					409	0.0017635
410	-0.0020439					410	-0.00223382					410	0.000399536					410	0.000616829		410	-0.000660573		410	0.000484146		410	-0.00270026					410	0.00307195					410	0.00345021
411	-0.00147187					411	-0.00148859					411	0.00035627					411	0.00149385		411	-0.000398508		411	-3.89766e-05		411	-0.00296027					411	0.00335803					411	0.00506867
412	-0.000359844					412	0.000566632					412	0.000813003					412	0.00121087		412	0.000283557		412	-0.000172099		412	-0.00212029					412	0.00309412					412	0.00610712
413	-2.78168e-05					413	0.00117186					413	0.000619737					413	0.000397896		413	0.00184562		413	-0.000315221		413	-0.000640308					413	0.0023902					413	0.00431558
414	-0.00058579					414	0.00197708					414	6.64708e-05					414	0.000444918		414	0.00200769		414	-0.000308344		414	0.000239674					414	0.00162629					414	0.00423403
415	-0.00076449					415	0.00253275					415	6.1812e-05					415	-8.72954e-05		415	0.00176199		415	0.000178236		415	0.000538903					415	0.00122471					415	0.00627473
416	-0.00112392					416	0.00178885					416	0.000546457					416	-0.000249127		416	0.000688534		416	0.00148452		416	0.000667755					416	0.000865465					416	0.00682769
417	-0.00149334					417	0.00107496					417	0.000801102					417	-0.000100958		417	0.000845078		417	0.0011608		417	0.000886607					417	0.000436223					417	0.00735064
418	-0.00249277					418	0.00011106					418	-0.000114253					418	-0.00050279		418	0.000361621		418	0.00181708		418	0.000305459					418	0.000826981					418	0.00807359
419	-0.00220219					419	0.000157164					419	-6.96083e-05					419	-0.000334621		419	0.000348165		419	0.00227336		419	-0.000405689					419	0.00138774					419	0.00628654
420	-0.00218218					420	-0.00082637					420	0.000413983					420	0.000464138		420	0.000276288		420	0.00291942		420	0.000262678					420	0.00120014					420	0.00408107
421	-0.000703087					421	0.000210683					421	0.000296711					421	0.00115338		421	0.00108697		421	0.00209511		421	0.000950649					421	0.00040521					421	0.00345817
422	-0.012514					422	-0.00825226					422	-0.00944056					422	-0.000427377		422	-0.00239234		422	0.0014808		422	-0.00532138					422	-0.00568972					422	-0.00227473
423	-0.0957749					423	-0.0850252					423	-0.0759278					423	-0.00647814		423	-0.0133217		423	-0.00799351		423	-0.0642034					423	-0.0559347					423	-0.0439176
424	-0.267036					424	-0.253898					424	-0.211215					424	-0.0185489		424	-0.029901		424	-0.0237078		424	-0.189105					424	-0.16141					424	-0.125471
425	-0.513377					425	-0.500661					425	-0.404143					425	-0.0326592		425	-0.0480193		425	-0.0424523		425	-0.368938					425	-0.314334					425	-0.242522
426	-0.809459					426	-0.803043					426	-0.633662					426	-0.046709		426	-0.0645049		426	-0.0593672		426	-0.58275					426	-0.497345					426	-0.382272
427	-1.07452					427	-1.0857					427	-0.842841					427	-0.0504687		427	-0.0708606		427	-0.0682821		427	-0.768803					427	-0.663726					427	-0.508721
428	-1.22139					428	-1.25517					428	-0.96499					428	-0.0427585		428	-0.0625662		428	-0.063717		428	-0.858066					428	-0.758637					428	-0.58037
429	-1.23653					429	-1.29114					429	-0.991869					429	-0.0240182		429	-0.0437518		429	-0.0476819		429	-0.838669					429	-0.771248					429	-0.592759
430	-1.13851					430	-1.2128					430	-0.934759					430	0.00142229		430	-0.0174569		430	-0.0230369		430	-0.731531					430	-0.711558					430	-0.553098
431	-0.963723					431	-1.05023					431	-0.8193					431	0.0278735		431	0.00957068		431	0.0038976		431	-0.569874					431	-0.599906					431	-0.473184
432	-0.786907					432	-0.876203					432	-0.6996					432	0.0440746		432	0.0296783		432	0.0243821		432	-0.425668					432	-0.483514					432	-0.38727
433	-0.642991					433	-0.732184					433	-0.597511					433	0.0496058		433	0.0401959		433	0.0362266		433	-0.330271					433	-0.386382					433	-0.312696
434	-0.536144					434	-0.621275					434	-0.515572					434	0.044397		434	0.0413736		434	0.0388811		434	-0.283384					434	-0.311859					434	-0.254432
435	-0.463058					435	-0.540516					435	-0.456663					435	0.0319383		435	0.0351112		435	0.0330356		435	-0.270957					435	-0.260667					435	-0.211398
436	-0.413684					436	-0.483866					436	-0.413395					436	0.0178504		436	0.0249017		436	0.0226995		436	-0.27432					436	-0.229702					436	-0.183861
437	-0.379359					437	-0.441766					437	-0.380327					437	0.00636238		437	0.0141221		437	0.0118133		437	-0.274254					437	-0.210096					437	-0.167864
438	-0.354134					438	-0.404316					438	-0.352479					438	-0.000255591		438	0.0062825		438	0.00394723		438	-0.262037					438	-0.195671					438	-0.156937
439	-0.330749					439	-0.368356					439	-0.325461					439	-0.000403563		439	0.00382292		439	0.000911124		439	-0.23619					439	-0.180486					439	-0.14567
440	-0.307695					440	-0.331876					440	-0.298013					440	0.00145853		440	0.00352334		440	0.000805013		440	-0.204764					440	-0.162481					440	-0.132773
441	-0.286801					441	-0.297425					441	-0.272727					441	0.00404134		441	0.00474588		441	0.00258835		441	-0.173907					441	-0.141993					441	-0.119654
442	-0.267938					442	-0.266204					442	-0.24958					442	0.00645415		442	0.00682865		442	0.00479163		442	-0.14707					442	-0.124196					442	-0.106565
443	-0.249325					443	-0.242034					443	-0.230654					443	0.00851697		443	0.00763141		443	0.0074449		443	-0.126714					443	-0.108378					443	-0.0951757
444	-0.232431					444	-0.224613					444	-0.215477					444	0.00907978		444	0.00791418		444	0.00869818		444	-0.113207					444	-0.0963305					444	-0.0861064
445	-0.215608					445	-0.212112					445	-0.202741					445	0.00937259		445	0.00848694		445	0.00935146		445	-0.10357					445	-0.0880429					445	-0.0782272
446	-0.198276					446	-0.20084					446	-0.192435					446	0.00892609		446	0.0085512		446	0.00868425		446	-0.0967134					446	-0.0823637					446	-0.0707565
447	-0.180494					447	-0.191188					447	-0.18318					447	0.00724961		447	0.00734585		447	0.00802691		447	-0.0922465					447	-0.0775541					447	-0.0638453
448	-0.163352					448	-0.181356					448	-0.172545					448	0.00602313		448	0.00591051		448	0.00606957		448	-0.0866996					448	-0.0723844					448	-0.0564541
449	-0.14672					449	-0.170185					449	-0.16191					449	0.00336666		449	0.00493517		449	0.00428224		449	-0.0798927					449	-0.0682448					449	-0.049903
450	-0.131938					450	-0.158763					450	-0.150894					450	0.00137018		450	0.00387983		450	0.0028149		450	-0.0723858					450	-0.0629852					450	-0.0454118
451	-0.117128					451	-0.14737					451	-0.13943					451	0.000704247		451	0.00308546		451	0.00216714		451	-0.0656785					451	-0.0576946					451	-0.0416897
452	-0.104627					452	-0.136187					452	-0.127266					452	0.00186841		452	0.00299156		452	0.00156918		452	-0.0581412					452	-0.0531934					452	-0.0372271
453	-0.0938666					453	-0.126074					453	-0.116241					453	0.00147257		453	0.00419766		453	0.00151122		453	-0.0513038					453	-0.0495523					453	-0.0323944
454	-0.0854062					454	-0.116392					454	-0.105687					454	0.00164673		454	0.00445377		454	0.00222326		454	-0.0460765					454	-0.0450712					454	-0.0271318
455	-0.0778257					455	-0.107289					455	-0.0970127					455	0.00193089		455	0.00336987		455	0.0022653		455	-0.0415391					455	-0.04141					455	-0.0230292
456	-0.072166					456	-0.0991253					456	-0.0883691					456	0.00264547		456	0.00196652		456	0.00201699		456	-0.0369613					456	-0.0383083					456	-0.021006
457	-0.066937					457	-0.0927415					457	-0.0815557					457	0.0027702		457	0.000813621		457	0.00131841		457	-0.0336332					457	-0.0355962					457	-0.0217923
458	-0.0607479					458	-0.0857377					458	-0.0764624					458	0.00232493		458	-0.00024928		458	-5.01822e-05		458	-0.0312552					458	-0.033164					458	-0.0223887
459	-0.0561289					459	-0.0796139					459	-0.072639					459	0.00233965		459	-0.00122218		459	-0.00148877		459	-0.0294872					459	-0.0306118					459	-0.023045
460	-0.0531198					460	-0.07351					460	-0.0680056					460	0.00177438		460	-0.00113508		460	-0.00214736		460	-0.0280091					460	-0.0290897					460	-0.0230814
461	-0.0491314					461	-0.0685558					461	-0.0644327					461	-5.05852e-05		461	4.22532e-05		461	-0.00217622		461	-0.0262505					461	-0.0276273					461	-0.0225875
462	-0.0451837					462	-0.062091					462	-0.0600401					462	-0.00176536		462	0.000369898		462	-0.00159544		462	-0.0245316					462	-0.0253445					462	-0.0204033
463	-0.043236					463	-0.0579062					463	-0.0558975					463	-0.00162014		463	0.000287543		463	-0.000544661		463	-0.0230227					463	-0.0236318					463	-0.0190291
464	-0.0402384					464	-0.0553314					464	-0.0514149					464	-0.00168492		464	-0.000244812		464	0.000516119		464	-0.0207238					464	-0.022149					464	-0.0168248
465	-0.0357007					465	-0.0516266					465	-0.0476223					465	-0.0018097		465	-0.00153717		465	0.0014969		465	-0.0190048					465	-0.0199463					465	-0.0156406
466	-0.0341935					466	-0.0480114					466	-0.04381					466	-0.000744266		466	-0.00305949		466	0.00250748		466	-0.0172453					466	-0.0172135					466	-0.0133263
467	-0.0320772					467	-0.0459556					467	-0.041948					467	-0.000468623		467	-0.00364175		467	0.00283762		467	-0.0167353					467	-0.0149607					467	-0.011082
468	-0.0296309					468	-0.0430298					468	-0.038176					468	2.70204e-05		468	-0.00381401		468	0.00295776		468	-0.0154152					468	-0.0130778					468	-0.00985764
469	-0.0275246					469	-0.038214					469	-0.035284					469	0.000582664		469	-0.00355627		469	0.0018079		469	-0.0147052					469	-0.011005					469	-0.00819329
470	-0.0253883					470	-0.0346782					470	-0.0332921					470	0.00211831		470	-0.00267853		470	0.00111804		470	-0.0139251					470	-0.00995216					470	-0.00550894
471	-0.0220523					471	-0.0317822					471	-0.0307502					471	0.00170408		471	-0.00160086		471	0.000828059		471	-0.0136946					471	-0.00990939					471	-0.00397464
472	-0.0199073					472	-0.0290955					472	-0.0276087					472	0.00165008		472	-0.00107347		472	4.75571e-05		472	-0.0118932					472	-0.00982691					472	-0.00327061
473	-0.0182124					473	-0.0266387					473	-0.0261372					473	9.60672e-05		473	-0.00168609		473	-0.000182945		473	-0.0111618					473	-0.00917443					473	-0.00165658
474	-0.0165175					474	-0.0251419					474	-0.0250457					474	-0.00130794		474	-0.0006487		474	0.000256553		474	-0.0101704					474	-0.00945195					474	-0.00245255
475	-0.0153326					475	-0.0238251					475	-0.0228042					475	-0.00214195		475	0.000308687		475	0.000416051		475	-0.008409					475	-0.00909947					475	-0.00219851
476	-0.0150778					476	-0.0222282					476	-0.0225227					476	-0.00270588		476	-8.39871e-05		476	-0.0006245		476	-0.00690719					476	-0.00783706					476	-0.00151454
477	-0.0147742					477	-0.0200104					477	-0.0220115					477	-0.00300961		477	-0.000677405		477	-0.000765651		477	-0.00697423					477	-0.00714541					477	-0.000691269
478	-0.0137706					478	-0.0178426					478	-0.0216603					478	-0.00341335		478	-0.000900822		478	-0.000866802		478	-0.00666128					478	-0.00648376					478	-0.000868002
479	-0.0131071					479	-0.0153748					479	-0.0198492					479	-0.00282708		479	-0.00203424		479	-3.7953e-05		479	-0.00521832					479	-0.00632211					479	-0.00127473
480	-0.0128035					480	-0.014347					480	-0.019568					480	-0.00350081		480	-0.00299766		480	0.000380896		480	-0.00574536					480	-0.00604047					480	-0.00235147
481	-0.0120399					481	-0.0136693					481	-0.0179568					481	-0.00298451		481	-0.00421107		481	0.000339745		481	-0.00638214					481	-0.00580882					481	-0.0027782
482	-0.0116276					482	-0.0124505					482	-0.0168758					482	-0.00191804		482	-0.00446569		482	-0.000132031		482	-0.00623739					482	-0.00448841					482	-0.00320609
483	-0.0115954					483	-0.0118817					483	-0.0160048					483	-0.000521567		483	-0.00367036		483	-0.000163836		483	-0.00620265					483	-0.00433806					483	-0.00277403
484	-0.0106932					484	-0.0111929					484	-0.0161538					484	-7.50946e-05		484	-0.00262503		484	-0.000825641		484	-0.0061779					484	-0.00291772					484	-0.00252197
485	-0.010421					485	-0.0108941					485	-0.0149127					485	0.000411378		485	-0.0011997		485	-0.00101745		485	-0.00483316					485	-0.00256737					485	-0.00429991
486	-0.00922875					486	-0.0100353					486	-0.0131217					486	0.000187854		486	0.000225625		486	-0.000779251		486	-0.00396835					486	-0.00214702					486	-0.00611785
487	-0.00658764					487	-0.00931571					487	-0.0124908					487	-0.000415542		487	0.000839527		487	0.000768391		487	-0.00335159					487	-0.00335815					487	-0.00693709
488	-0.00462675					488	-0.00841591					488	-0.0117998					488	-0.000298939		488	0.000173153		488	0.00113593		488	-0.00237484					488	-0.00326957					488	-0.00739658
489	-0.00416586					489	-0.00853612					489	-0.0113888					489	0.000357665		489	-0.00110322		489	0.000783462		489	-0.00333808					489	-0.00478099					489	-0.00690607
490	-0.00355497					490	-0.00742632					490	-0.0118678					490	0.000454269		490	-0.0021796		490	0.000790998		490	-0.00440133					490	-0.00526241					490	-0.00407556
491	-0.00330407					491	-0.00684652					491	-0.0128769					491	0.000880872		491	-0.00273597		491	0.00112853		491	-0.00461458					491	-0.00594383					491	-0.00183505
492	-0.00320413					492	-0.007366					492	-0.0120458					492	0.00162753		492	-0.00257389		492	-0.000114409		492	-0.00399578					492	-0.00534685					492	-0.000215693
493	-0.00388456					493	-0.00742519					493	-0.0105747					493	0.00188419		493	-0.00173242		493	-0.000887538		493	-0.00381679					493	-0.0051105					493	4.32115e-05
494	-0.00316499					494	-0.00666438					494	-0.00924362					494	0.00120085		494	-0.00153095		494	-0.000690667		494	-0.0036978					494	-0.00368416					494	-0.000357884
495	-0.00266542					495	-0.00541357					495	-0.00831254					495	0.00149752		495	-0.00168948		495	-0.000963796		495	-0.00287882					495	-0.00324781					495	-0.00178898
496	-0.00242586					496	-0.00371277					496	-0.00770146					496	0.00150418		496	-0.001638		496	-0.000866925		496	-0.00291983					496	-0.00298146					496	-0.00308007
497	-0.00300707					497	-0.00316135					497	-0.00746017					497	0.000530822		497	-0.00201809		497	-0.000520451		497	-0.00324888					497	-0.00290674					497	-0.00337205
498	-0.00265881					498	-0.00337953					498	-0.00672884					498	-0.000562541		498	-0.00233923		498	0.00043576		498	-0.00311744					498	-0.0037031					498	-0.00260462
499	-0.00306055					499	-0.0038177					499	-0.0062675					499	-0.000515903		499	-0.00242036		499	0.00071197		499	-0.001256					499	-0.00408945					499	0.00056281
500	-0.00427229					500	-0.00487588					500	-0.00579617					500	-0.000589266		500	-0.00283149		500	0.00053818		500	-0.000654562					500	-0.00336581					500	0.00404024
501	-0.00497403					501	-0.00557406					501	-0.00531483					501	-0.000932628		501	-0.00271262		501	0.00026439		501	0.000636878					501	-0.00278216					501	0.00730767
502	-0.0048664					502	-0.00471175					502	-0.00462323					502	-0.00169607		502	-0.00290517		502	0.00017029		502	0.00119015					502	-0.00251004					502	0.00772448
503	-0.00521944					503	-0.0025389					503	-0.0055115					503	-0.00150956		503	-0.00346925		503	-0.000264145		503	0.00117426					503	-0.00175955					503	0.00629061
504	-0.00543248					504	-0.00188606					504	-0.00513977					504	-0.00213305		504	-0.00386333		504	-0.00113858		504	0.000588381					504	-0.000789068					504	0.00317674
505	-0.00467552					505	-0.00153322					505	-0.00506804					505	-0.00190653		505	-0.00369741		505	-0.00124302		505	0.000612497					505	-0.00115858					505	0.000822866
506	-0.00464856					506	-0.00125038					506	-0.00587631					506	-0.00141002		506	-0.00262149		506	-0.00108745		506	0.00104661					506	-0.0017581					506	-0.000521004
507	-0.00558207					507	-0.00137717					507	-0.00613427					507	-0.000223604		507	-0.00142647		507	-0.00145211		507	0.00112237					507	-0.00349882					507	-0.000495355
508	-0.00558639					508	-0.0018333					508	-0.005862					508	0.000632731		508	0.000116944		508	-0.00139717		508	0.00213939					508	-0.00343168					508	-0.000390549
509	-0.00502072					509	-0.00161944					509	-0.00589973					509	0.00111907		509	0.00103036		509	0.000897779		509	0.0021664					509	-0.00415453					509	-0.00114574
510	-0.00434505					510	-0.000925573					510	-0.00547746					510	5.54011e-05		510	0.00162378		510	0.00149272		510	0.00247341					510	-0.00380739					510	-0.00243094
511	-0.00412937					511	-0.000401708					511	-0.00378518					511	-0.000708264		511	0.000607198		511	0.00156767		511	0.00205043					511	-0.00250025					511	-0.00388613
512	-0.00426401					512	-3.75932e-05					512	-0.0039926					512	-0.00104202		512	-0.000139737		512	0.00238247		512	0.0015388					512	-0.000443716					512	-0.00578166
513	-0.00503962					513	-0.000662701					513	-0.00365965					513	-0.00205589		513	-0.000797767		513	0.00154684		513	-8.11608e-05					513	9.09111e-05					513	-0.00573822
514	-0.00582522					514	-0.00110781					514	-0.00382669					514	-0.00264975		514	0.000134203		514	-0.000958787		514	-0.000771122					514	0.000145538					514	-0.00563479
515	-0.00561082					515	-0.000822917					515	-0.00295373					515	-0.00220362		515	0.000556172		515	-0.00133442		515	-0.000221083					515	0.000750165					515	-0.00478135
516	-0.00509643					516	-0.000648024					516	-0.00379078					516	-0.00175748		516	0.000898142		516	-0.00131005		516	-1.04452e-06					516	0.000334792					516	-0.00445792
517	-0.00413219					517	-0.000893003					517	-0.00320754					517	-0.00128141		517	0.00167005		517	-0.00174574		517	0.000279992					517	0.000249291					517	-0.00195463
518	-0.00285906					518	-0.000577079					518	-0.00316376					518	-0.000205461		518	0.00159151		518	-0.00186192		518	0.000903023					518	-0.000237104					518	0.0011576
519	-0.00181592					519	0.000288845					519	-0.00234997					519	0.00109049		519	0.00137298		519	-0.0011581		519	0.000866054					519	-0.000863498					519	0.00504984
520	-0.00182279					520	0.000414769					520	-0.00232618					520	0.000526441		520	0.00137445		520	-0.00128428		520	-0.000220914					520	-0.00198989					520	0.00755208
521	-0.00138966					521	-0.000219307					521	-0.0014124					521	0.000492392		521	0.00177591		521	-0.00179046		521	-0.000627883					521	-0.00157629					521	0.00886432
522	-0.000296537					522	-0.000473377					522	-0.000948396					522	0.000838316		522	0.00143738		522	-0.00189665		522	0.000225779					522	-0.00106268					522	0.00794655
523	-0.00050466					523	-0.000476416					523	-0.00104363					523	0.00174414		523	0.00166887		523	-0.00239329		523	0.000841723					523	-0.000548443					523	0.00439779
524	-0.000632782					524	-9.94564e-05					524	-0.00157887					524	0.00191997		524	0.000660359		524	-0.00247994		524	0.00101767					524	0.000455792					524	0.000489022
525	-0.000760904					525	0.000337504					525	-0.0021741					525	0.00266579		525	-0.000618151		525	-0.00177659		525	0.000573612					525	0.00166003					525	-0.00171974
526	-0.000479026					526	0.00169446					526	-0.00188934					526	0.00201162		526	-0.00114666		526	-0.00175323		526	-0.000830444					526	0.00187426					526	-0.0042185
527	-0.000977148					527	0.00156142					527	-0.000584456					527	0.00177743		527	-0.00124517		527	-0.00150988		527	-0.00202422					527	0.0018485					527	-0.00344727
528	-0.000596373					528	0.000759307					528	0.000781518					528	0.000403143		528	-0.000703539		528	0.000613222		528	-0.00196547					528	0.00207486					528	-0.000816927
529	0.000344262					529	4.73079e-05					529	0.000937492					529	-0.000341144		529	0.00017811		529	0.00110629		529	-0.00138673					529	0.00206149					529	0.000423301
530	0.000194897					530	-0.000814692					530	0.000833465					530	-0.000485432		530	0.00154976		530	-0.00026064		530	-0.00120798					530	0.00112813					530	-0.00135647
531	-0.000324467					531	-0.00205669					531	0.000259439					531	-8.97187e-05		531	0.00114141		531	-0.000667571		531	-0.000549234					531	0.000554761					531	-0.000476244
532	-9.38321e-05					532	-0.000658691					532	2.54124e-05					532	-0.000114006		532	0.000583058		532	-0.0014745		532	0.000119513					532	0.000861394					532	-0.00225602
533	0.000305857					533	0.00117011					533	0.000382879					533	-0.000538435		533	0.000284923		533	-0.00250147		533	0.000161029					533	0.00171078					533	-0.00346653
534	-0.000414738					534	0.00255916					534	0.00173037					534	-0.000552866		534	-1.31472e-05		534	-0.00333844		534	0.000422592					534	0.002751					534	-0.00225728
535	0.000234666					535	0.0036882					535	0.00271786					535	-0.000337298		535	-0.000481217		535	-0.00290542		535	0.00117416					535	0.00445122					535	0.00093198
536	-2.59294e-05					536	0.00450725					536	0.00366536					536	-0.000271729		536	0.000420713		536	-0.00230239		536	0.00228572					536	0.00411143					536	0.00280124
537	-0.000556525					537	0.00378629					537	0.00230285					537	0.000173839		537	0.00110264		537	-0.00136937		537	0.00241728					537	0.00388165					537	0.00417049
538	-0.000427908					538	0.00256597					538	0.000421764					538	0.00103926		538	0.00060474		538	-0.00185616		538	0.00216131					538	0.00267438					538	0.00454918
539	0.000580284					539	0.00198599					539	-0.0010491					539	0.00197466		539	-0.000293072		539	-0.00122286		539	0.00185573					539	0.00203846					539	0.00414757
540	0.000738477					540	0.000916008					540	-0.00132997					540	0.00234005		540	0.000169115		540	-0.00070956		540	0.00222014					540	0.00135255					540	0.00351595
541	0.00142667					541	0.000556027					541	-0.00186083					541	0.00297545		541	0.000131302		541	-0.00154626		541	0.00147455					541	0.00126664					541	0.00215434
542	-0.00171514					542	-0.00538395					542	-0.0030317					542	0.00204085		542	-0.00055651		542	-0.00230296		542	-0.00442103					542	-0.000909279					542	0.00246272
543	-0.0516776					543	-0.0680735					543	-0.0384014					543	-0.0051339		543	-0.00913424		543	-0.0079393		543	-0.0582746					543	-0.0324934					543	-0.0128793
544	-0.174351					544	-0.205093					544	-0.125141					544	-0.0178487		544	-0.0240219		544	-0.0210253		544	-0.169727					544	-0.112156					544	-0.0625717
545	-0.361044					545	-0.405372					545	-0.2577					545	-0.0322435		545	-0.0432696		545	-0.0377814		545	-0.32919					545	-0.233839					545	-0.144464
546	-0.593367					546	-0.647631					546	-0.421019					546	-0.0463483		546	-0.0604472		546	-0.0547574		546	-0.515853					546	-0.386161					546	-0.250397
547	-0.81891					547	-0.870721					547	-0.579609					547	-0.0522931		547	-0.0689049		547	-0.0661935		547	-0.672966					547	-0.533364					547	-0.358259
548	-0.959203					548	-0.9987					548	-0.679777					548	-0.045248		548	-0.0617525		548	-0.0646291		548	-0.738957					548	-0.625215					548	-0.435112
549	-0.986717					549	-1.01674					549	-0.705685					549	-0.026243		549	-0.0417802		549	-0.050154		549	-0.705747					549	-0.644645					549	-0.460645
550	-0.915731					550	-0.940617					550	-0.664863					550	-0.000838029		550	-0.0138078		550	-0.027789		550	-0.593478					550	-0.599025					550	-0.440908
551	-0.773685					551	-0.799406					551	-0.575411					551	0.026637		551	0.0150146		551	9.59905e-05		551	-0.437458					551	-0.502964					551	-0.382281
552	-0.61778					552	-0.653885					552	-0.476329					552	0.044792		552	0.0354269		552	0.022721		552	-0.305438					552	-0.396914					552	-0.310804
553	-0.491444					553	-0.536313					553	-0.395296					553	0.0518368		553	0.0457093		553	0.0359064		553	-0.224837					553	-0.309333					553	-0.246018
554	-0.401579					554	-0.447992					554	-0.333693					554	0.0471016		554	0.0463115		554	0.0392129		554	-0.193095					554	-0.244511					554	-0.194662
555	-0.344494					555	-0.386201					555	-0.29161					555	0.0349863		555	0.0388838		555	0.0345394		555	-0.196992					555	-0.202499					555	-0.154816
556	-0.30981					556	-0.344979					556	-0.264627					556	0.0193611		556	0.0266761		556	0.0241258		556	-0.21423					556	-0.178586					556	-0.12886
557	-0.288795					557	-0.315438					557	-0.246863					557	0.00637585		557	0.0153484		557	0.0128223		557	-0.224608					557	-0.166054					557	-0.114713
558	-0.27291					558	-0.289776					558	-0.2307					558	-0.0016095		558	0.00736061		558	0.00447905		558	-0.218785					558	-0.156201					558	-0.107907
559	-0.256827					559	-0.266355					559	-0.215435					559	-0.003525		559	0.00337267		559	0.000917341		559	-0.19862					559	-0.144187					559	-0.104342
560	-0.238493					560	-0.239954					560	-0.197751					560	-0.0012405		560	0.00382474		560	0.000685631		560	-0.170165					560	-0.128813					560	-0.0991065
561	-0.220239					561	-0.212952					561	-0.180857					561	0.002184		561	0.0060568		561	0.00214392		561	-0.140831					561	-0.111599					561	-0.092601
562	-0.204046					562	-0.189041					562	-0.165082					562	0.0047985		562	0.00814887		562	0.00431221		562	-0.117106					562	-0.0943353					562	-0.0846555
563	-0.189902					563	-0.16971					563	-0.151568					563	0.00732292		563	0.00958091		563	0.00598063		563	-0.0991707					563	-0.0806813					563	-0.0750101
564	-0.17788					564	-0.154869					564	-0.139762					564	0.00853715		564	0.0108026		564	0.00594114		564	-0.0881838					564	-0.0711064					564	-0.0646652
565	-0.165287					565	-0.145678					565	-0.131067					565	0.00839137		565	0.0100044		565	0.00541165		565	-0.0806769					565	-0.0644514					565	-0.0573503
566	-0.153634					566	-0.139097					566	-0.122992					566	0.00766559		566	0.00981611		566	0.00448216		566	-0.07586					566	-0.0600665					566	-0.0520754
567	-0.141102					567	-0.133196					567	-0.116276					567	0.00628981		567	0.00846785		567	0.00337268		567	-0.0712131					567	-0.0572915					567	-0.0486106
568	-0.127799					568	-0.127295					568	-0.109521					568	0.00528399		568	0.00660958		568	0.00197319		568	-0.0676459					568	-0.0532066					568	-0.0478657
569	-0.115157					569	-0.120105					569	-0.101725					569	0.00377791		569	0.00489089		569	0.00112615		569	-0.0623569					569	-0.0500913					569	-0.0461513
570	-0.104306					570	-0.112574					570	-0.0934687					570	0.00234184		570	0.00432217		570	0.000429276		570	-0.0561478					570	-0.0459459					570	-0.043227
571	-0.0934942					571	-0.103744					571	-0.0850426					571	0.00213576		571	0.00292345		571	0.000192402		571	-0.0488188					571	-0.0424606					571	-0.0384526
572	-0.0835726					572	-0.0934334					572	-0.0767465					572	0.00247969		572	0.00217473		572	-0.000224473		572	-0.0429998					572	-0.0390452					572	-0.0329383
573	-0.0750909					573	-0.0841331					573	-0.0694603					573	0.0015136		573	0.00179601		573	-0.000581347		573	-0.0375607					573	-0.0366399					573	-0.026624
574	-0.0672301					574	-0.0759234					574	-0.0628236					574	0.0014472		574	0.000946826		574	-0.000725763		574	-0.0330097					574	-0.0334847					574	-0.02158
575	-0.0610995					575	-0.0695139					575	-0.0568468					575	0.00156081		575	-0.000632466		575	-0.00100963		575	-0.0301887					575	-0.0308996					575	-0.0172762
576	-0.0556189					576	-0.0651345					576	-0.0522801					576	0.000344412		576	-0.00122176		576	-0.0013435		576	-0.0286376					576	-0.0275444					576	-0.0160123
577	-0.0502383					577	-0.062585					577	-0.0482833					577	-0.000781983		577	-7.10487e-05		577	-0.00208738		577	-0.0256766					577	-0.0241793					577	-0.0158785
578	-0.0457676					578	-0.0590255					578	-0.0447966					578	-0.000748377		578	0.00043966		578	-0.00251125		578	-0.0238856					578	-0.0217342					578	-0.0174546
579	-0.0418777					579	-0.0557368					579	-0.0417794					579	-0.00173509		579	0.00102988		579	-0.00274274		579	-0.0218329					579	-0.0192396					579	-0.0198811
580	-0.037938					580	-0.0513285					580	-0.0393921					580	-0.00244183		580	0.0020899		580	-0.00253322		580	-0.01937					580	-0.0173652					580	-0.0215277
581	-0.0356283					581	-0.0460902					581	-0.0374349					581	-0.00240856		581	0.00304991		581	-0.0027437		581	-0.0179671					581	-0.0157909					581	-0.0214042
582	-0.0328886					582	-0.0417519					582	-0.0342176					582	-0.0019853		582	0.00124993		582	-0.00205418		582	-0.0167442					582	-0.0143565					582	-0.0184808
583	-0.0305289					583	-0.0386835					583	-0.0309504					583	-0.00269203		583	0.000419945		583	-0.00162465		583	-0.0162113					583	-0.0134422					583	-0.0140074
584	-0.0288298					584	-0.034986					584	-0.0290528					584	-0.00205906		584	-0.000530512		584	-0.00115293		584	-0.016057					584	-0.0126886					584	-0.0097742
585	-0.027191					585	-0.0327691					585	-0.0270652					585	-0.00215616		585	-0.00186131		585	0.000140374		585	-0.0158024					585	-0.0116957					585	-0.00750116
586	-0.0248423					586	-0.0304722					586	-0.0240576					586	-0.00121326		586	-0.00297211		586	0.00153368		586	-0.0145577					586	-0.0112627					586	-0.00719812
587	-0.0232135					587	-0.0285453					587	-0.02332					587	-0.00156035		587	-0.00305291		587	0.00207699		587	-0.0137431					587	-0.0107798					587	-0.00996508
588	-0.0223747					588	-0.0263284					588	-0.0228724					588	-0.000547449		588	-0.0032637		588	0.00164029		588	-0.0118285					588	-0.0110868					588	-0.013612
589	-0.0196364					589	-0.0248223					589	-0.0220746					589	-0.000694814		589	-0.00304493		589	0.00141553		589	-0.0103627					589	-0.0104548					589	-0.0163191
590	-0.0176285					590	-0.0222971					590	-0.0213468					590	0.000327706		590	-0.00167667		590	0.000443009		590	-0.00968644					590	-0.00996377					590	-0.0176864
591	-0.0159206					591	-0.0207419					591	-0.019899					591	2.26139e-07		591	-0.0010884		591	-0.000649511		591	-0.00927019					591	-0.00892279					591	-0.0155137
592	-0.0158927					592	-0.0197767					592	-0.0179312					592	0.000172746		592	-0.00157013		592	-0.000662031		592	-0.00930394					592	-0.00896181					592	-0.011181
593	-0.0140848					593	-0.0184115					593	-0.0159133					593	-0.000544733		593	-0.00125186		593	-0.000444551		593	-0.00914768					593	-0.00721082					593	-0.00675827
594	-0.0133772					594	-0.016387					594	-0.0139155					594	0.000377552		594	-0.00102395		594	-0.0008155		594	-0.00828055					594	-0.00649072					594	-0.00190564
595	-0.0118202					595	-0.0162137					595	-0.0124776					595	-0.000490331		595	-0.00148674		595	-0.00102345		595	-0.0070028					595	-0.00713231					595	0.00165681
596	-0.0110632					596	-0.0130905					596	-0.0130597					596	-0.000148214		596	-0.00167953		596	-0.000601399		596	-0.00650505					596	-0.0077139					596	0.000779256
597	-0.0100661					597	-0.0106272					597	-0.0120618					597	-0.000256097		597	-0.00121231		597	-0.00151935		597	-0.0068773					597	-0.00716549					597	-0.00237829
598	-0.00966907					598	-0.010494					598	-0.0115039					598	0.00010602		598	-0.000375099		598	-0.0016773		598	-0.00618955					598	-0.00648708					598	-0.00550585
599	-0.0101822					599	-0.0107012					599	-0.0110561					599	-0.000742058		599	0.00014185		599	-0.00156412		599	-0.00592115					599	-0.00578938					599	-0.00875345
600	-0.00970599					600	-0.00940023					600	-0.0105583					600	0.00039964		600	-4.21104e-05		600	-0.00151706		600	-0.00716203					600	-0.00427414					600	-0.0106912
601	-0.00910976					601	-0.0107292					601	-0.00985047					601	0.00117134		601	-8.60712e-05		601	-0.00237001		601	-0.0072129					601	-0.00335889					601	-0.011289
602	-0.00820354					602	-0.0114882					602	-0.00997267					602	0.00142304		602	0.000359968		602	-0.00260295		602	-0.00531378					602	-0.00280364					602	-0.0100767
603	-0.00755731					603	-0.0105172					603	-0.00959486					603	0.00139474		603	-0.000513993		603	-0.00227589		603	-0.00557466					603	-0.0036584					603	-0.00841451
604	-0.00605117					604	-0.00933646					604	-0.00849714					604	0.00182628		604	-0.00110809		604	-0.00225825		604	-0.0059251					604	-0.00396355					604	-0.0066323
605	-0.00661572					605	-0.00837795					605	-0.00821956					605	0.00124753		605	-0.000673347		605	-0.00175566		605	-0.00429473					605	-0.00460206					605	-0.00539023
606	-0.00648027					606	-0.00709944					606	-0.00741198					606	-0.000581212		606	-0.000538604		606	-0.00175307		606	-0.00335435					606	-0.00462058					606	-0.00233815
607	-0.00673483					607	-0.00542093					607	-0.00699441					607	-0.000329957		607	9.61404e-05		607	-0.000530483		607	-0.00365398					607	-0.00516909					607	0.000333918
608	-0.00702938					608	-0.00436243					608	-0.00614683					608	-0.000268702		608	0.00116088		608	-0.000547894		608	-0.00280361					608	-0.0038776					608	0.00218599
609	-0.00788394					609	-0.00450392					609	-0.00662934					609	-0.000687564		609	0.00162563		609	-0.000165305		609	-0.00169298					609	-0.00316611					609	0.000868061
610	-0.00779923					610	-0.00460815					610	-0.00599213					610	-0.00066681		610	0.00207897		610	-0.000636636		610	-0.00281148					610	-0.00220892					610	-0.00107997
611	-0.00727453					611	-0.00528242					611	-0.00599493					611	0.000343943		611	0.00220228		611	-0.00040789		611	-0.00346999					611	-0.00208178					611	-0.00431801
612	-0.00613983					612	-0.00547668					612	-0.00579773					612	0.000944697		612	0.0022256		612	-0.00182914		612	-0.0026285					612	-0.00137465					612	-0.00838605
613	-0.00577513					613	-0.00535095					613	-0.00659052					613	0.00146545		613	0.00159892		613	-0.0023104		613	-0.002897					613	-0.00143751					613	-0.0109841
614	-0.00511043					614	-0.00475521					614	-0.00632338					614	0.00254614		614	0.000502241		614	-0.00303165		614	-0.00243539					614	-0.00198037					614	-0.0112821
615	-0.00491635					615	-0.00406212					615	-0.00578669					615	0.00134633		615	-0.000215979		615	-0.00299696		615	-0.0013329					615	-0.00261752					615	-0.0104702
616	-0.00460236					616	-0.00319943					616	-0.00465001					616	0.000166516		616	-0.000164432		616	-0.00265136		616	-0.000840412					616	-0.00238531					616	-0.00903829
617	-0.00492837					617	-0.00257673					617	-0.00365332					617	-0.000963296		617	-0.000812884		617	-0.00230577		617	-0.00123792					617	-0.00299311					617	-0.00525638
618	-0.00420439					618	-0.00230404					618	-0.00288664					618	-0.00165311		618	-0.000931337		618	0.00017982		618	-0.00033543					618	-0.0028509					618	-0.00260447
619	-0.0038204					619	-0.00233135					619	-0.00255995					619	-0.00348292		619	0.00012021		619	0.00693541		619	-0.000652938					619	-0.0023787					619	0.00072744
620	-0.00292692					620	-0.00177114					620	-0.00300393					620	-0.00315338		620	0.000450008		620	0.0144367		620	-0.00016957					620	-0.00178034					620	0.00339935
621	-0.00325362					621	-0.00226175					621	-0.00295792					621	-0.00257384		621	0.000479222		621	0.0206299		621	-0.000286201					621	-0.00196326					621	0.00602126
622	-0.00321031					622	-0.00229237					622	-0.0032519					622	-0.0033443		622	0.000478436		622	0.0267831		622	-0.000822832					622	-0.00106619					622	0.00643317
623	-0.003917					623	-0.00264299					623	-0.00209588					623	-0.00321476		623	0.00068765		623	0.0294562		623	-0.00215946					623	-0.000879114					623	0.00689508
624	-0.0037937					624	-0.00201361					624	-0.00183986					624	-0.00177522		624	-0.000233135		624	0.0261394		624	-0.00242609					624	-0.000342038					624	0.00594699
625	-0.0045008					625	-0.00222648					625	-0.00190455					625	-0.000656257		625	-0.000865748		625	0.0208875		625	-0.00222198					625	0.000182165					625	0.00399894
626	-0.00346814					626	-0.00246068					626	-0.00196935					626	0.000892629		626	-0.00144943		626	0.0159384		626	-0.00221776					626	0.00070469					626	0.0025609
627	-0.00220547					627	-0.00268487					627	-0.00172414					627	0.00163152		627	-0.00211311		627	0.0114394		627	-0.00154355					627	0.00124722					627	0.00265287
628	-0.00114281					628	-0.00229906					628	-0.00314893					628	0.0014904		628	-0.00263679		628	0.00699031		628	-0.000569331					628	0.000919741					628	0.00305483
629	0.000169847					629	-0.00320325					629	-0.00371372					629	0.000269287		629	-0.00160047		629	0.00433124		629	-0.000665115					629	0.000792266					629	0.0038868
630	0.000962194					630	-0.00241934					630	-0.00297925					630	-0.000592289		630	-0.000535796		630	0.00342571		630	-0.00132007					630	0.000672822					630	0.00535882
631	0.000844242					631	-0.00115722					631	-0.003035					631	-0.00162401		631	-0.000142689		631	0.00325354		631	-0.000504765					631	0.000471505					631	0.00542089
632	-0.00024371					632	-0.000675095					632	-0.00239075					632	-0.000485724		632	0.000540418		632	0.00281137		632	-0.000889463					632	-0.000739813					632	0.00307296
633	-0.000311662					633	-0.000582975					633	-0.0020165					633	0.000162559		633	0.000273525		633	0.0028092		633	-0.00101416					633	0.00015887					633	-8.49627e-05
634	-0.00184961					634	-0.000420855					634	-0.00197225					634	0.00120084		634	0.000236632		634	0.00162703		634	-0.00064886					634	0.00121755					634	-0.00261289
635	-0.00190779					635	-0.00112012					635	-0.00233868					635	0.00173876		635	-0.000621507		635	0.000807073		635	-0.000312563					635	0.0012649					635	-0.00546075
636	-0.00247633					636	-0.00012151					636	-0.00171547					636	0.00237649		636	-0.000811564		636	-0.000839466		636	0.00016427					636	0.000880204					636	-0.00801852
637	-0.00152486					637	-4.29021e-05					637	-0.00145227					637	0.00128421		637	-0.000901621		637	-0.002816		637	0.000571103					637	0.000945505					637	-0.00904628
638	-0.00134339					638	0.000695706					638	-0.00113907					638	-3.80637e-05		638	-0.000331678		638	-0.00370254		638	0.000327935					638	-0.000269194					638	-0.00960405
639	-0.00038192					639	0.000894314					639	0.000204135					639	-0.00110034		639	-0.000921735		639	-0.00278908		639	-0.000175232					639	-0.00223389					639	-0.00939181
640	-0.0013406					640	-7.7968e-05					640	0.000686857					640	-0.0014329		640	-0.000722607		640	-0.00324443		640	-0.000777303					640	-0.00229944					640	-0.00663952
641	-0.000549677					641	-0.0017926					641	0.000609157					641	-0.00213571		641	-0.000565628		641	-0.00338663		641	-0.00227841					641	-0.00172721					641	-0.00306706
642	-0.000418752					642	-0.00310722					642	0.000251457					642	-0.00189852		642	-0.000228649		642	-0.00307883		642	-0.00189952					642	-0.00167498					642	0.00115539
643	-0.000657828					643	-0.00379185					643	0.000823757					643	-0.000721328		643	-0.00035167		643	-0.00362102		643	-0.000930634					643	-0.00185276					643	0.00555784
644	-0.000646903					644	-0.00355648					644	-7.39426e-05					644	0.00126586		644	0.000395309		644	-0.00424322		644	-0.000251745					644	-0.00114053					644	0.00880029
645	0.000673946					645	-0.00143154					645	0.000118067					645	0.00132284		645	0.00112189		645	-0.00468492		645	0.00116826					645	-0.000268667					645	0.00796279
646	0.000404389					646	-0.00027897					646	-5.03286e-05					646	0.000689536		646	0.00039629		646	-0.00475391		646	0.00251983					646	0.000281224					646	0.00576551
647	2.48324e-05					647	0.000493601					647	-0.000198725					647	0.000776228		647	-0.000389306		647	-0.00435291		647	0.00289139					647	0.00203112					647	0.00232823
648	0.000505275					648	0.000766173					648	-0.000127121					648	0.00065292		648	-2.49019e-05		648	-0.0040919		648	0.00217296					648	0.00349101					648	-0.000759048
649	0.000435718					649	0.00126874					649	0.000454483					649	0.000649612		649	-3.04976e-05		649	-0.00513089		649	0.00134453					649	0.0042609					649	-0.00319633
650	0.000996146					650	0.00100124					650	-0.000324069					650	0.000286164		650	-0.000426176		650	-0.0053798		650	0.000777058					650	0.00341073					650	-0.00174359
651	0.000486166					651	0.00174164					651	7.0147e-06					651	-0.000257609		651	-0.00103397		651	-0.00466648		651	0.000371834					651	0.00256896					651	0.00104946
652	0.000336187					652	0.00264204					652	0.000228098					652	-0.000401383		652	-1.75871e-06		652	-0.00478317		652	0.000466611					652	0.000787189					652	0.0027925
653	-0.000413792					653	0.00263244					653	-0.000390818					653	-0.000305157		653	0.00010045		653	-0.00517985		653	0.00215139					653	-0.000974581					653	0.00220555
654	-0.000273771					654	0.00217285					654	-4.97349e-05					654	-0.00113893		654	0.000122658		654	-0.00537653		654	0.00333616					654	-0.00239635					654	0.00221859
655	-0.00113375					655	0.00120325					655	0.00155128					655	-0.000382785		655	5.48668e-05		655	-0.00571322		655	0.00401157					655	-0.00220812					655	0.000521641
656	-0.000894102					656	0.000562068					656	0.00166201					656	-0.000107001		656	0.000725453		656	-0.00649836		656	0.0039398					656	-0.00179144					656	-0.00255496
657	-0.00170449					657	0.000760745					657	0.00144273					657	-0.000121217		657	0.000215896		657	-0.00638336		657	0.00329802					657	-0.00165489					657	-0.00516153
658	-0.00140487					658	0.000719422					658	0.00147346					658	-0.000575433		658	-0.000533661		658	-0.00580836		658	0.00278625					658	-0.000298345					658	-0.0056981
659	-0.000815253					659	0.000808099					659	0.00162419					659	-0.000569649		659	-0.00148322		659	-0.00436336		659	0.00232448					659	0.000138201					659	-0.00743467
660	0.000274364					660	0.00211678					660	0.00205489					660	-0.000393892		660	-0.00250278		660	-0.00392836		660	0.00197292					660	0.000114747					660	-0.00905124
661	0.00155373					661	0.00134426					661	0.00298532					661	0.000391486		661	-0.00146343		661	-0.00397231		661	0.00271444					661	0.000420165					661	-0.00923741
662	-0.000136972					662	-0.00265855					662	0.000885745					662	-0.000893137		662	-0.00158435		662	-0.00457601		662	-0.000324043					662	-0.0019147					662	-0.00930348
663	-0.0438977					663	-0.0479114					663	-0.0305038					663	-0.00786776		663	-0.00921527		663	-0.0108897		663	-0.0405425					663	-0.0345796					663	-0.0314396
664	-0.148708					664	-0.154554					664	-0.103893					664	-0.0192824		664	-0.0233462		664	-0.0235034		664	-0.131321					664	-0.108574					664	-0.0833756
665	-0.304409					665	-0.315367					665	-0.210553					665	-0.031957		665	-0.0389371		665	-0.0394571		665	-0.264349					665	-0.217799					665	-0.158842
666	-0.49619					666	-0.511841					666	-0.339983					666	-0.044202		666	-0.0559287		666	-0.0550201		666	-0.424715					666	-0.351165					666	-0.248717
667	-0.676861					667	-0.696815					667	-0.459073					667	-0.049067		667	-0.0646806		667	-0.0646328		667	-0.564251					667	-0.473521					667	-0.330643
668	-0.782432					668	-0.807459					668	-0.527203					668	-0.040872		668	-0.0585725		668	-0.0624555		668	-0.627086					668	-0.542627					668	-0.376188
669	-0.794603					669	-0.823953					669	-0.533762					669	-0.022727		669	-0.0394745		669	-0.0479582		669	-0.600332					669	-0.547432					669	-0.376044
670	-0.728153					670	-0.761127					670	-0.489882					670	0.00179805		670	-0.0136864		670	-0.0240409		670	-0.501947					670	-0.497138					670	-0.338739
671	-0.604824					671	-0.641112					671	-0.408092					671	0.0274828		671	0.0162614		671	0.00242679		671	-0.36074					671	-0.406594					671	-0.275214
672	-0.475615					672	-0.514487					672	-0.324633					672	0.0453175		672	0.0370988		672	0.0220848		672	-0.237403					672	-0.313541					672	-0.211779
673	-0.373896					673	-0.412182					673	-0.259603					673	0.0512821		673	0.0475063		673	0.0336528		673	-0.164156					673	-0.239457					673	-0.159263
674	-0.303687					674	-0.338827					674	-0.213943					674	0.0464268		674	0.0473038		674	0.0356507		674	-0.140219					674	-0.187304					674	-0.120528
675	-0.260068					675	-0.289063					675	-0.186553					675	0.0339915		675	0.0387412		675	0.0279287		675	-0.149551					675	-0.15511					675	-0.0946525
676	-0.235789					676	-0.258028					676	-0.173053					676	0.019076		676	0.0253586		676	0.0172369		676	-0.172882					676	-0.138566					676	-0.0804468
677	-0.22176					677	-0.237014					677	-0.165904					677	0.00605035		677	0.0134658		677	0.00730524		677	-0.189733					677	-0.129823					677	-0.0731404
678	-0.209901					678	-0.21877					678	-0.159144					678	-0.000885271		678	0.00479305		678	-0.000466407		678	-0.189063					678	-0.12324					678	-0.0706941
679	-0.196192					679	-0.200196					679	-0.150475					679	-0.00199089		679	0.00220027		679	-0.00396805		679	-0.170864					679	-0.114556					679	-0.0694078
680	-0.180913					680	-0.179682					680	-0.139755					680	-0.000136503		680	0.0024375		680	-0.00234969		680	-0.143974					680	-0.102933					680	-0.0666815
681	-0.163994					681	-0.158499					681	-0.126806					681	0.00331773		681	0.00428477		681	-0.000461313		681	-0.115863					681	-0.0887391					681	-0.0622348
682	-0.148504					682	-0.140215					682	-0.114677					682	0.00724186		682	0.00660212		682	0.00184711		682	-0.0928314					682	-0.0760753					682	-0.0561674
683	-0.136065					683	-0.125702					683	-0.103417					683	0.010216		683	0.00848948		683	0.00427553		683	-0.0764397					683	-0.0655516					683	-0.04902
684	-0.126036					684	-0.114429					684	-0.094788					684	0.0114601		684	0.00865684		684	0.00535395		684	-0.0664879					684	-0.0575078					684	-0.0428226
685	-0.115976					685	-0.106946					685	-0.0865688					685	0.0119142		685	0.0089542		685	0.00471236		685	-0.0607662					685	-0.0523941					685	-0.0391952
686	-0.107637					686	-0.100552					686	-0.0812396					686	0.0105483		686	0.00770166		686	0.00390073		686	-0.0573536					686	-0.0500102					686	-0.0343476
687	-0.0989474					687	-0.0960596					687	-0.0762307					687	0.00870217		687	0.00665953		687	0.0028589		687	-0.0542001					687	-0.0476857					687	-0.0277389
688	-0.0910078					688	-0.0911268					688	-0.0710117					688	0.00580608		688	0.00592739		688	0.000857072		688	-0.0511365					688	-0.0449312					688	-0.0194603
689	-0.0806982					689	-0.085524					689	-0.0649127					689	0.00354		689	0.00462525		689	-0.000724758		689	-0.046393					689	-0.0415967					689	-0.0127816
690	-0.0723086					690	-0.0794612					690	-0.0593137					690	0.00161391		690	0.00433312		690	-0.00222659		690	-0.0419894					690	-0.0380422					690	-0.00636301
691	-0.0649689					691	-0.0729584					691	-0.0531148					691	0.00239775		691	0.00505106		691	-0.00377847		691	-0.0374553					691	-0.0346277					691	-0.00392424
692	-0.0596389					692	-0.0654958					692	-0.0479461					692	0.00289148		692	0.00409981		692	-0.00448086		692	-0.0320703					692	-0.030622					692	-0.00448421
693	-0.0529388					693	-0.0596133					693	-0.0434274					693	0.00276521		693	0.00344855		693	-0.00319325		693	-0.0286352					693	-0.0282364					693	-0.00705418
694	-0.0495888					694	-0.0546908					694	-0.0396687					694	0.00293894		694	0.0022973		694	-0.00309564		694	-0.0262202					694	-0.0261708					694	-0.00904415
695	-0.0469887					695	-0.0500982					695	-0.03563					695	0.00249267		695	0.00111605		695	-0.00274803		695	-0.0238051					695	-0.0236152					695	-0.0108541
696	-0.0438687					696	-0.0459857					696	-0.0328514					696	0.000546369		696	-9.52075e-05		696	-0.00122042		696	-0.0221498					696	-0.0216395					696	-0.0106241
697	-0.0395881					697	-0.0423432					697	-0.0299029					697	0.000629958		697	-0.000335245		697	-0.00106366		697	-0.0206435					697	-0.0204824					697	-0.0105626
698	-0.0374175					698	-0.0382608					698	-0.0278345					698	0.00164355		698	-0.000225243		698	-0.00206692		698	-0.0189972					698	-0.0182652					698	-0.011621
699	-0.0350268					699	-0.0349783					699	-0.0262161					699	0.00254714		699	0.000994759		699	-0.00209019		699	-0.0176809					699	-0.016358					699	-0.0111394
700	-0.0312162					700	-0.0322558					700	-0.0242576					700	0.00330072		700	0.00121476		700	-0.00188345		700	-0.0160747					700	-0.0165308					700	-0.0117379
701	-0.0272056					701	-0.0305133					701	-0.0227693					701	0.0039143		701	0.00197476		701	-0.00258671		701	-0.0147283					701	-0.0150836					701	-0.0139363
702	-0.0242344					702	-0.0286107					702	-0.0207111					702	0.00286778		702	0.00198615		702	-0.00274098		702	-0.0146411					702	-0.0141046					702	-0.0158033
703	-0.0208931					703	-0.0271881					703	-0.0189829					703	0.00125127		703	0.00120778		703	-0.00237543		703	-0.0132139					703	-0.0136054					703	-0.0141801
704	-0.0183018					704	-0.0251155					704	-0.0171448					704	-0.00113525		704	-1.05835e-05		704	-0.00271988		704	-0.0129667					704	-0.0125562					704	-0.0121368
705	-0.0170105					705	-0.0233329					705	-0.0166166					705	-0.00195176		705	-0.00129895		705	-0.00261432		705	-0.0140795					705	-0.010217					705	-0.00837355
706	-0.0157292					706	-0.0211803					706	-0.0153885					706	-0.00147828		706	-0.00262732		706	-0.00267877		706	-0.0146923					706	-0.00948782					706	-0.0043403
707	-0.0144873					707	-0.0202074					707	-0.0147806					707	-0.000964859		707	-0.00293422		707	-0.00370431		707	-0.0153145					707	-0.00871684					707	-0.00267571
708	-0.0135352					708	-0.0194544					708	-0.0151427					708	0.000668559		708	-0.00268058		708	-0.00430025		708	-0.0154267					708	-0.0077452					708	-0.00274062
709	-0.011423					709	-0.0183415					709	-0.0146948					709	0.00210198		709	-0.00187694		709	-0.00373619		709	-0.0148688					709	-0.00736356					709	-0.00355554
710	-0.00972091					710	-0.0164985					710	-0.0133569					710	0.0019254		710	-0.000913307		710	-0.00317213		710	-0.014901					710	-0.00744192					710	-0.00498045
711	-0.00966878					711	-0.0154755					711	-0.012189					711	0.000638815		711	6.03304e-05		711	-0.00291808		711	-0.0142732					711	-0.00670029					711	-0.00628536
712	-0.00876608					712	-0.0141422					712	-0.0103614					712	-0.000407793		712	0.000645425		712	-0.00211512		712	-0.0133651					712	-0.0066169					712	-0.00523906
713	-0.00697301					713	-0.0124887					713	-0.00801377					713	-0.000994402		713	0.000681443		713	-0.00091287		713	-0.0126669					713	-0.00717241					713	-0.004082
714	-0.00730994					714	-0.0113852					714	-0.00726615					714	-0.000301012		714	0.00065746		714	-0.000260617		714	-0.0114688					714	-0.00635791					714	-0.00373493
715	-0.00704688					715	-0.0109717					715	-0.00724853					715	0.000172378		715	0.00160348		715	-0.000218364		715	-0.00920063					715	-0.00573342					715	-0.00399786
716	-0.00611381					716	-0.00969814					716	-0.00759091					716	0.000595768		716	0.00117949		716	-0.000516111		716	-0.00806248					716	-0.00492892					716	-0.0047208
717	-0.00565021					717	-0.00878425					717	-0.00832349					717	0.00101917		717	0.00110687		717	-1.49031e-05		717	-0.00641431					717	-0.00359281					717	-0.00565268
718	-0.00514607					718	-0.00793997					718	-0.00907613					718	0.000272565		718	0.000275642		718	-0.000204767		718	-0.00524613					718	-0.00160503					718	-0.00536348
719	-0.00397193					719	-0.0070357					719	-0.00842878					719	-0.00141404		719	-0.000955586		719	2.5369e-05		719	-0.00488795					719	-0.000557252					719	-0.00513428
720	-0.00373779					720	-0.00753142					720	-0.00724142					720	-0.00100064		720	-0.00123682		720	-0.000714495		720	-0.00356976					720	0.000320526					720	-0.00341508
721	-0.00368366					721	-0.00844715					721	-0.00638406					721	-0.00139724		721	-0.00188804		721	-0.000394359		721	-0.00230158					721	0.000268304					721	-0.00114588
722	-0.00362907					722	-0.00784251					722	-0.00636687					722	-0.00125381		722	-0.0021681		722	-0.00051513		722	-0.00208358					722	-0.000182526					722	-8.5833e-05
723	-0.00338373					723	-0.00727727					723	-0.00570978					723	-0.00103036		723	-0.0010062		723	-0.00147741		723	-0.00192566					723	-0.000401037					723	0.000395643
724	-0.0033684					724	-0.00683204					724	-0.00597268					724	0.000223088		724	0.0011757		724	-0.0028597		724	-0.00139774					724	-0.000379549					724	0.00184712
725	-0.00269306					725	-0.0057168					725	-0.00596558					725	-0.000153465		725	0.000987601		725	-0.00274198		725	-0.00216983					725	-0.00033806					725	0.00280859
726	-0.00137773					726	-0.00451156					726	-0.00577848					726	0.000939981		726	0.0015695		726	-0.00332427		726	-0.00264191					726	-0.00101657					726	0.00406007
727	-0.00151206					727	-0.00384603					727	-0.00460152					727	0.000703475		727	0.0014223		727	-0.00234723		727	-0.0043143					727	-0.00115402					727	0.00562215
728	-0.0025854					728	-0.00475963					728	-0.00432468					728	0.000737007		728	0.000497702		728	-0.00115218		728	-0.00568695					728	-0.0013384					728	0.006806
729	-0.00249874					729	-0.00480323					729	-0.00375784					729	0.000610539		729	-0.000946895		729	-0.000457121		729	-0.00731959					729	-0.00256277					729	0.00578984
730	-0.00278208					730	-0.00420682					730	-0.004221					730	-0.000165929		730	-0.00201149		730	-0.000472065		730	-0.00771224					730	-0.00309714					730	0.00274368
731	-0.00356543					731	-0.00446042					731	-0.00317415					731	-0.000532397		731	-0.00189609		731	0.00018299		731	-0.00726488					731	-0.00259152					731	-0.00103247
732	-0.00318857					732	-0.00500383					732	-0.00277742					732	-0.000208812		732	-0.00167015		732	-0.00140234		732	-0.0058179					732	-0.00176525					732	-0.00401832
733	-0.00282047					733	-0.00350606					733	-0.00231083					733	0.000224843		733	-0.000230871		733	-0.00226009		733	-0.0046714					733	-0.00211495					733	-0.0065222
734	-0.00349236					734	-0.00274829					734	-0.00124425					734	0.000368497		734	-0.000351589		734	-0.00183784		734	-0.0032049					734	-0.00169466					734	-0.00628609
735	-0.00364426					735	-0.00296052					735	-0.000327657					735	0.000992152		735	6.76916e-05		735	-0.000725588		735	-0.0030384					735	-0.00103436					735	-0.00430998
736	-0.00357615					736	-0.00166275					736	-0.000261069					736	0.000405807		736	0.000506973		736	-0.000683337		736	-0.0030719					736	-0.000924063					736	-0.00272386
737	-0.00415802					737	-0.000194947					737	-0.00122456					737	0.000719511		737	-0.000543666		737	0.000258859		737	-0.00336577					737	-0.000863659					737	-0.00103771
738	-0.00312834					738	-0.000445601					738	-0.00147822					738	0.000493322		738	-0.00189013		738	0.000448221		738	-0.00310042					738	0.000622346					738	-0.000939353
739	-0.00204866					739	-0.00110626					739	-0.00259188					739	-1.28681e-05		739	-0.0011566		739	-0.000192417		739	-0.00329508					739	0.00183835					739	-0.001771
740	-0.00151898					740	-0.000246911					740	-0.00293554					740	9.42291e-07		740	-0.00124307		740	-0.00179306		740	-0.00279973					740	0.00163436					740	-0.00366265
741	-0.000989298					741	-0.000847566					741	-0.00328921					741	8.47527e-05		741	-0.00242953		741	-0.00196369		741	-0.00381439					741	0.00151036					741	-0.00426429
742	-0.000609618					742	-0.00225822					742	-0.00218292					742	-0.000431402		742	-0.001296		742	-0.00239433		742	-0.00377934					742	0.00188637					742	-0.00550594
743	-0.00188841					743	-0.00256728					743	-0.00133683					743	-0.000137417		743	-0.000678299		743	-0.0018476		743	-0.00423544					743	0.0011185					743	-0.00745541
744	-0.00294703					744	-0.00228615					744	-0.000540735					744	-0.000733431		744	-0.000750136		744	-0.00170117		744	-0.00398155					744	0.00109131					744	-0.00881465
745	-0.00322565					745	-0.00265503					745	-0.000484643					745	-0.000599446		745	0.000178027		745	-0.000374735		745	-0.00338765					745	0.000994119					745	-0.00861388
746	-0.00365427					746	-0.00236391					746	-0.000298552					746	0.00104454		746	0.000786189		746	-0.000758301		746	-0.00229376					746	0.00115693					746	-0.00869311
747	-0.00302289					747	-0.000862784					747	-0.00101248					747	0.000508541		747	0.000804352		747	-0.00121187		747	-0.00146001					747	0.000999739					747	-0.00862235
748	-0.00206008					748	-0.000480112					748	-0.00122663					748	-7.27753e-06		748	0.00117641		748	-0.00179769		748	-0.000367863					748	0.00165829					748	-0.00752929
749	-0.000716875					749	-0.000307007					749	-0.00112079					749	-0.000133096		749	0.00137956		749	-0.00180414		749	0.000134284					749	0.00143845					749	-0.00437558
750	-0.000573669					750	-0.000423901					750	-0.00176494					750	0.000451085		750	0.000672707		750	-0.0015806		750	-0.000643569					750	0.0015186					750	-0.00264188
751	-0.000720463					751	-0.000280796					751	-0.00155909					751	-0.000794733		751	0.000415856		751	-0.00160706		751	-0.000661422					751	0.00141876					751	-0.00178818
752	-0.000637256					752	-0.000837691					752	-0.00110324					752	0.000109448		752	6.90046e-05		752	-0.000393511		752	-0.000579275					752	0.000838917					752	-0.00106447
753	-0.000582756					753	-0.00107314					753	-0.00143763					753	0.000493837		753	-0.000754448		753	0.000548192		753	-0.0010591					753	-4.6067e-05					753	-0.000728218
754	-0.000807598					754	-0.000267845					754	-0.00197202					754	0.00144823		754	-0.00164617		754	0.00100896		754	-0.002099					754	-0.000608576					754	-0.00206066
755	0.000137561					755	0.000197447					755	-0.000836415					755	0.00193263		755	-0.00104789		755	0.000169721		755	-0.0010689					755	-8.10851e-05					755	-0.00250311
756	0.00115272					756	-6.7261e-05					756	-0.000820808					756	0.00258703		756	-0.00139961		756	7.04854e-05		756	0.000241208					756	0.000286406					756	-0.00079555
757	0.000567879					757	-0.000461969					757	-0.000845201					757	0.00215142		757	-0.00118133		757	-0.00052875		757	0.000611312					757	0.000813897					757	0.00153201
758	0.000154168					758	0.000564624					758	-0.00119978					758	0.00173599		758	-0.00088013		758	-0.00150942		758	0.000839426					758	0.00207519					758	0.00473222
759	6.14052e-05					759	7.23086e-05					759	-0.0010144					759	0.000540594		759	-0.000326479		759	-0.0015113		759	0.00131719					759	0.00278967					759	0.00598468
760	-0.00140136					760	-0.000340007					760	-0.00074902					760	-0.000774804		760	-0.00116283		760	-0.00114317		760	-0.000435046					760	0.00230415					760	0.00777713
761	-0.00201412					761	-3.2322e-05					761	-0.000583638					761	-0.0014902		761	0.000300823		761	-0.000585047		761	-0.00223728					761	0.00218864					761	0.00837958
762	-0.000296883					762	0.000115363					762	1.17443e-05					762	-0.0014356		762	0.000374474		762	-0.00103692		762	-0.00178952					762	0.00171312					762	0.00843204
763	0.000461291					763	-0.000775845					763	0.000287043					763	-0.000770886		763	0.00107064		763	-0.000679847		763	-0.00133369					763	0.0008502					763	0.00848694
764	0.000760733					764	-0.000855553					764	-0.000297689					764	-0.00041613		764	0.000770211		764	-6.41893e-05		764	-0.000978558					764	-0.000169204					764	0.00957514
765	0.00139018					765	0.000194738					765	-0.00072242					765	-1.37421e-06		765	0.00146978		765	-7.8532e-05		765	-0.000443429					765	-1.86084e-05					765	0.0103634
766	0.00183962					766	0.000385029					766	-0.000767152					766	0.000323382		766	0.000339351		766	0.000487125		766	-0.0005483					766	-0.000158013					766	0.00904156
767	0.000939059					767	0.00020532					767	-0.000801884					767	-0.000251863		767	-0.000171079		767	0.00252278		767	-0.00198317					767	-0.000697417					767	0.00789977
768	0.00083921					768	0.000486482					768	-0.000476563					768	-0.000707034		768	-0.00104956		768	0.00223774		768	-0.00260981					768	-0.00139535					768	0.00696985
769	0.000870969					769	0.000569615					769	0.000948792					769	-0.000372161		769	0.000396384		769	0.00114113		769	-0.00173755					769	-0.000919964					769	0.00667418
770	0.000832727					770	0.000412748					770	0.00155415					770	-0.00103729		770	0.000922326		770	-6.54919e-05		770	-0.000985282					770	-0.000774575					770	0.0055185
771	0.000614486					771	6.58805e-05					771	0.0019895					771	-0.00151241		771	0.00123827		771	-0.000432109		771	0.000406982					771	-0.000959186					771	0.00455282
772	0.000546244					772	0.000499013					772	0.00170485					772	-0.000957541		772	0.00155421		772	-0.00149873		772	0.00120925					772	-0.000453797					772	0.00306715
773	0.000908441					773	0.00152271					773	0.00120034					773	-0.00162261		773	0.00186139		773	-0.000755741		773	0.000510051					773	-7.77165e-05					773	0.0015126
774	0.00105254					774	0.00221887					774	0.000545948					774	-0.00209763		774	0.00144394		774	-0.000374474		774	-0.000520601					774	0.00014136					774	0.00126296
775	0.000786635					775	0.00214503					775	-0.000868441					775	-0.00198266		775	0.0011165		775	0.000796793		775	-0.000621253					775	0.000300436					775	0.000873318
776	0.000510732					776	0.00266119					776	-0.00197283					776	-0.00163768		776	0.00150905		776	0.00109806		776	-0.00106191					776	0.000889512					776	0.00277368
777	0.000814829					777	0.00237735					777	-0.00251722					777	-0.0018927		777	0.00205161		777	0.000329327		777	-0.000882557					777	0.00103859					777	0.00378403
778	-0.00017092					778	0.00179372					778	-0.00219148					778	-0.00104766		778	0.0027346		778	-0.000639541		778	0.000315679					778	0.00198785					778	0.00424479
779	-0.000284584					779	0.00154289					779	-0.00244554					779	-0.000262524		779	0.00323353		779	-0.000810231		779	0.000462127					779	0.00211959					779	0.00224089
780	0.00108175					780	0.00165206					780	-0.0016096					780	-0.000197391		780	0.00390245		780	-0.00132092		780	0.000988575					780	0.00184134					780	0.003087
781	0.00158809					781	0.000961228					781	-0.000623654					781	-0.000172258		781	0.00313138		781	-0.00167161		781	0.00126502					781	0.000813085					781	0.00272311
782	0.000884425					782	0.000180398					782	-0.00289771					782	-0.00101713		782	0.00258031		782	-0.000292302		782	-0.00150853					782	0.00048483					782	0.00373922
783	-0.0249292					783	-0.0265904					783	-0.0282816					783	-0.00727193		783	-0.00460077		783	-0.00342299		783	-0.0399028					783	-0.0198234					783	-0.00754468
784	-0.102991					784	-0.104959					784	-0.0860552					784	-0.0181266		784	-0.0184363		784	-0.0137954		784	-0.124549					784	-0.0768902					784	-0.0428934
785	-0.228003					785	-0.230847					785	-0.171879					785	-0.0304012		785	-0.0356715		785	-0.0279679		785	-0.246826					785	-0.165837					785	-0.103412
786	-0.385644					786	-0.391905					786	-0.276272					786	-0.0431058		786	-0.0527368		786	-0.0445404		786	-0.391802					786	-0.278024					786	-0.18108
787	-0.543756					787	-0.553743					787	-0.371196					787	-0.0487504		787	-0.063412		787	-0.0574229		787	-0.513338					787	-0.39004					787	-0.260539
788	-0.648217					788	-0.662131					788	-0.423429					788	-0.041835		788	-0.0593572		788	-0.0592854		788	-0.560955					788	-0.462467					788	-0.313697
789	-0.670927					789	-0.690086					789	-0.423302					789	-0.0245393		789	-0.0418981		789	-0.0480693		789	-0.523614					789	-0.476543					789	-0.326102
790	-0.622227					790	-0.645212					790	-0.378985					790	0.000516368		790	-0.016028		790	-0.0278834		790	-0.419873					790	-0.43941					790	-0.302735
791	-0.520547					791	-0.544887					791	-0.305678					791	0.0265121		791	0.014042		791	-0.00125757		791	-0.281043					791	-0.362776					791	-0.249919
792	-0.405326					792	-0.429292					792	-0.233341					792	0.0450278		792	0.0375021		792	0.0212983		792	-0.166312					792	-0.276412					792	-0.185802
793	-0.311916					793	-0.335138					793	-0.179024					793	0.0506335		793	0.0496621		793	0.0340941		793	-0.102451					793	-0.206129					793	-0.132216
794	-0.246384					794	-0.267291					794	-0.145536					794	0.0454896		794	0.0508555		794	0.0365289		794	-0.0888828					794	-0.155315					794	-0.0941857
795	-0.205892					795	-0.223524					795	-0.129728					795	0.0319157		795	0.0427103		795	0.0324832		795	-0.109385					795	-0.124812					795	-0.0681644
796	-0.18477					796	-0.198657					796	-0.1238					796	0.0176218		796	0.0309651		796	0.0233376		796	-0.139706					796	-0.109389					796	-0.0540932
797	-0.174758					797	-0.18399					797	-0.122542					797	0.00423792		797	0.0184598		797	0.0139419		797	-0.159338					797	-0.103136					797	-0.048942
798	-0.167046					798	-0.171353					798	-0.120694					798	-0.00282597		798	0.0093346		798	0.00785623		798	-0.16045					798	-0.0998835					798	-0.0478107
799	-0.158513					799	-0.159005					799	-0.115655					799	-0.0029494		799	0.00450185		799	0.00722976		799	-0.145424					799	-0.0948316					799	-0.0483269
800	-0.146519					800	-0.143795					800	-0.107026					800	-0.000762788		800	0.00483079		800	0.00843274		800	-0.120789					800	-0.0862105					800	-0.0484614
801	-0.131645					801	-0.126126					801	-0.0982268					801	0.00139382		801	0.00563973		801	0.0107757		801	-0.0969732					801	-0.0753394					801	-0.0479058
802	-0.115972					802	-0.110406					802	-0.0880378					802	0.00516044		802	0.00736867		802	0.0128387		802	-0.0780976					802	-0.0630383					802	-0.0464703
803	-0.102788					803	-0.0978371					803	-0.0785387					803	0.00820705		803	0.00854761		803	0.0137617		803	-0.0642821					803	-0.0519172					803	-0.0427747
804	-0.0929835					804	-0.0871568					804	-0.0709587					804	0.00887414		804	0.00912827		804	0.0129041		804	-0.0543385					804	-0.0437075					804	-0.0369773
805	-0.0846183					805	-0.0793353					805	-0.0653685					805	0.00884134		805	0.00911082		805	0.0117358		805	-0.0482555					805	-0.0384894					805	-0.0323677
806	-0.0792631					806	-0.0745639					806	-0.0595082					806	0.00868854		806	0.00866337		806	0.00962761		806	-0.0430325					806	-0.0348712					806	-0.0276182
807	-0.074748					807	-0.0705424					807	-0.054418					807	0.00789574		807	0.00827592		807	0.00712938		807	-0.0396595					807	-0.0335431					807	-0.0234887
808	-0.0707028					808	-0.067781					808	-0.0495777					808	0.00609295		808	0.00834848		808	0.00553115		808	-0.0366664					808	-0.032265					808	-0.0211492
809	-0.0641872					809	-0.0646589					809	-0.0435265					809	0.00401061		809	0.00744212		809	0.00443254		809	-0.0329151					809	-0.0316383					809	-0.0188984
810	-0.0584407					810	-0.0616656					810	-0.0374648					810	0.00302849		810	0.00703773		810	0.00211325		810	-0.0281345					810	-0.0288744					810	-0.0167952
811	-0.0511043					811	-0.0578023					811	-0.0327231					811	0.00156637		811	0.00689334		811	0.000423953		811	-0.024394					811	-0.0264504					811	-0.0170521
812	-0.0447278					812	-0.052929					812	-0.0287015					812	5.42552e-05		812	0.00567895		812	-0.00061534		812	-0.0206334					812	-0.0249464					812	-0.016939
813	-0.0386514					813	-0.0473456					813	-0.0259898					813	-0.000607864		813	0.00499456		813	-0.00190463		813	-0.0185029					813	-0.0231824					813	-0.0156658
814	-0.0340447					814	-0.0423919					814	-0.0247572					814	1.04509e-05		814	0.00564076		814	-0.00324414		814	-0.0178937					814	-0.0209896					814	-0.0158419
815	-0.0297671					815	-0.0376869					815	-0.023974					815	0.0010391		815	0.00534887		815	-0.00307435		815	-0.0189055					815	-0.0188809					815	-0.0141555
816	-0.0269295					816	-0.0332719					816	-0.0229807					816	0.00167774		816	0.00547698		816	-0.00280455		816	-0.0189073					816	-0.0175522					816	-0.0108691
817	-0.0247719					817	-0.0307369					817	-0.0226774					817	0.00200639		817	0.00621509		817	-0.00199475		817	-0.0182191					817	-0.0156335					817	-0.00802274
818	-0.0230743					818	-0.0295019					818	-0.0217342					818	0.00284504		818	0.0060832		818	-0.00157496		818	-0.016641					818	-0.0138048					818	-0.00667636
819	-0.0216766					819	-0.0285167					819	-0.0203601					819	0.00226407		819	0.00550154		819	-0.00131525		819	-0.0157738					819	-0.0123968					819	-0.00461962
820	-0.0199581					820	-0.0273002					820	-0.0178651					820	0.00140357		820	0.00519159		820	4.37821e-05		820	-0.013908					820	-0.0110545					820	-0.00369034
821	-0.0183795					821	-0.0254836					821	-0.01598					821	0.00042307		821	0.00479164		821	0.000532816		821	-0.0119821					821	-0.00922217					821	-0.00361105
822	-0.017221					822	-0.0233771					822	-0.014645					822	0.000122571		822	0.00444169		822	-0.00046815		822	-0.0109263					822	-0.00721985					822	-0.00266176
823	-0.0164024					823	-0.0202306					823	-0.01392					823	-0.000997928		823	0.00420175		823	-0.000199115		823	-0.0104504					823	-0.00628753					823	-0.00167248
824	-0.0149439					824	-0.0177041					824	-0.0135243					824	-0.00154811		824	0.0033618		824	0.000799919		824	-0.00854532					824	-0.00563521					824	-0.00198319
825	-0.0137345					825	-0.0164963					825	-0.0135273					825	-0.00194767		825	0.00290324		825	0.00050834		825	-0.00801171					825	-0.00565043					825	-0.00265137
826	-0.0123452					826	-0.0156784					826	-0.0138103					826	-0.00103723		826	0.00260468		826	0.000526762		826	-0.0074781					826	-0.00546565					826	-0.00228954
827	-0.0105958					827	-0.0149406					827	-0.0130533					827	-0.000806786		827	0.00385612		827	0.00114518		827	-0.00683448					827	-0.00570087					827	-0.00404772
828	-0.00841645					828	-0.0145728					828	-0.0116563					828	-0.000226343		828	0.00495756		828	0.0016136		828	-0.00484087					828	-0.0054361					828	-0.00549589
829	-0.00739709					829	-0.013005					829	-0.0113688					829	0.000544322		829	0.006819		829	0.000342026		829	-0.00348773					829	-0.00549132					829	-0.00372407
830	-0.00662716					830	-0.0115861					830	-0.0113097					830	0.000345795		830	0.00724117		830	0.000430039		830	-0.00366629					830	-0.00526418					830	-0.00161032
831	-0.00651715					831	-0.0108372					831	-0.0108505					831	0.000177267		831	0.00655345		831	0.000597997		831	-0.00336485					831	-0.00542808					831	0.000283686
832	-0.00583714					832	-0.00979823					832	-0.0104614					832	-0.00042126		832	0.00494572		832	0.000805955		832	-0.0035134					832	-0.00597197					832	0.00317769
833	-0.00520712					833	-0.00960928					833	-0.0100522					833	-0.00136979		833	0.00418799		833	-1.60864e-05		833	-0.00384196					833	-0.00591586					833	0.0061617
834	-0.00424711					834	-0.0102103					834	-0.00900287					834	-0.0013882		834	0.00371026		834	0.000431872		834	-0.00400073					834	-0.00543976					834	0.0078757
835	-0.00379673					835	-0.00928066					835	-0.0080814					835	-0.000645613		835	0.00474274		835	6.95903e-05		835	-0.00240138					835	-0.00507113					835	0.0091111
836	-0.00236622					836	-0.00848078					836	-0.00778993					836	-0.00110302		836	0.00632529		836	0.000417234		836	-0.00256204					836	-0.00495484					836	0.00912693
837	-0.00249572					837	-0.00695089					837	-0.00743847					837	-0.000540432		837	0.00691783		837	0.000364878		837	-0.00223269					837	-0.00460854					837	0.00623276
838	-0.00205521					838	-0.006071					838	-0.006607					838	0.000192158		838	0.00621038		838	0.000792522		838	-0.00216334					838	-0.00433224					838	0.00494859
839	-0.00140471					839	-0.00493112					839	-0.00620553					839	0.000214748		839	0.00495293		839	0.00102017		839	-0.002684					839	-0.00373595					839	0.00265442
840	-0.000603991					840	-0.00542075					840	-0.0065116					840	-0.000681476		840	0.00283529		840	-0.0001023		840	-0.00293664					840	-0.00385653					840	0.0013912
841	-0.000143154					841	-0.00519012					841	-0.00483762					841	-0.000307679		841	0.00187755		841	-0.00129483		841	-0.00263931					841	-0.00308093					841	0.000528497
842	0.00105768					842	-0.00593949					842	-0.00439365					842	-0.000513883		842	0.00168982		842	-0.00142735		842	-0.00225199					842	-0.00178533					842	0.00187579
843	0.00156852					843	-0.00450886					843	-0.00594967					843	-0.000380087		843	0.00213208		843	-0.00143988		843	-0.00269466					843	-0.00176973					843	0.00206309
844	0.00137936					844	-0.00390823					844	-0.0064057					844	-0.000116291		844	0.00216435		844	-0.00132241		844	-0.00132734					844	-0.00168413					844	0.00243039
845	0.00169029					845	-0.0029873					845	-0.00575939					845	-0.000631373		845	0.0028461		845	8.50574e-05		845	-0.000681703					845	-0.00150407					845	0.00203827
846	0.000291296					846	-0.00235612					846	-0.00603272					846	-0.000436283		846	0.00174739		846	0.00110251		846	0.000233673					846	-0.00251902					846	0.00202667
847	4.23073e-05					847	-0.00220493					847	-0.00557606					847	-0.000441193		847	0.00132868		847	0.000719968		847	0.00121905					847	-0.00346398					847	0.000785071
848	-0.00124668					848	-0.00232375					848	-0.00432939					848	-0.000426103		848	0.000989966		848	0.000477423		848	0.00227443					848	-0.00291893					848	-0.000936527
849	-0.00174567					849	-0.00247256					849	-0.00331272					849	-0.00139101		849	0.00139125		849	-0.000165121		849	0.0014498					849	-0.00157388					849	-0.00206812
850	-0.00223465					850	-0.00236123					850	-0.0030439					850	0.000625114		850	0.000921633		850	-0.0010876		850	0.00122377					850	-0.00107265					850	-0.00321943
851	-0.000893629					851	-0.00179968					851	-0.00293436					851	0.00197159		851	0.000490679		851	-0.00194999		851	0.000777275					851	-3.70048e-05					851	-0.0032503
852	-0.000672603					852	-0.00144813					852	-0.00251482					852	0.00354806		852	-2.75343e-07		852	-0.00192238		852	-0.000149223					852	0.000708645					852	-0.00198117
853	-0.000271578					853	-0.00137658					853	-0.00196528					853	0.00415453		853	-0.000171229		853	-0.00152477		853	-0.000685721					853	0.00127429					853	-0.000542046
854	0.000449448					854	-0.00145503					854	-0.00266574					854	0.00413101		854	-0.000232183		854	-0.00113716		854	-0.000722219					854	0.000509943					854	-0.000202918
855	0.000200432					855	-0.00173344					855	-0.00357427					855	0.00217839		855	-0.00058425		855	-0.000389447		855	-0.000769855					855	0.000973366					855	0.000326329
856	-0.000338687					856	-0.00234171					856	-0.00427167					856	-0.000193701		856	-9.90754e-05		856	-0.000121475		856	-0.00032815					856	0.00062127					856	-0.000244127
857	-0.000907806					857	-0.00265999					857	-0.00374907					857	-0.00215579		857	-0.000413901		857	0.000696498		857	-0.00116644					857	-0.000370827					857	-0.00140458
858	-0.000846925					858	-0.00356826					858	-0.00385648					858	-0.00363788		858	-0.00114873		858	0.000234471		858	-0.000634738					858	-0.00167292					858	-0.00420504
859	-0.00172604					859	-0.00284654					859	-0.00304388					859	-0.00308998		859	-0.00247355		859	0.000782443		859	-0.000893033					859	-0.00237502					859	-0.0074555
860	-0.00175521					860	-0.00185482					860	-0.00235961					860	-0.00182132		860	-0.00258928		860	0.000260517		860	-0.00108218					860	-0.00352814					860	-0.0101759
861	-0.00184464					861	-0.00102311					861	-0.00261377					861	-0.000691979		861	-0.00220944		861	0.000619091		861	-0.00172212					861	-0.00393628					861	-0.0115261
862	-0.00154406					862	-0.000741402					862	-0.00350794					862	2.73667e-05		862	-0.0019296		862	0.00119767		862	-0.00138206					862	-0.00168442					862	-0.0113064
863	-0.000823481					863	-0.000259694					863	-0.0039521					863	0.000346712		863	-0.00150976		863	0.00181624		863	-0.00202201					863	-0.000772556					863	-0.00900658
864	-9.29039e-05					864	-0.000497985					864	-0.00470626					864	0.000246058		864	-0.00133992		864	0.00244481		864	-0.00104195					864	7.9304e-05					864	-0.0044268
865	-0.00068235					865	-0.000606286					865	-0.00479906					865	-0.000324003		865	-5.0388e-05		865	0.00200343		865	-0.000952417					865	-8.90171e-05					865	8.30008e-05
866	-0.000672235					866	-0.00147477					866	-0.0045398					866	-0.000463173		866	0.000583271		866	0.0012928		866	-0.000403668					866	-0.000150776					866	0.00271323
867	-0.00140212					867	-0.000783246					867	-0.00447054					867	-0.000562342		867	0.00055693		867	-2.78229e-05		867	0.000655081					867	-0.00180254					867	0.00413345
868	-0.000902006					868	-0.00124173					868	-0.00435128					868	-0.000641512		868	-0.000509412		868	-0.00105845		868	0.00110383					868	-0.00107429					868	0.00468368
869	-0.000791891					869	-0.00220021					869	-0.00379203					869	-0.000890681		869	0.000174247		869	-0.00165907		869	0.00106258					869	-0.000636053					869	0.0051639
870	-7.17762e-05					870	-0.00230869					870	-0.00293175					870	-0.000809411		870	-0.000772094		870	-0.0012297		870	0.000781088					870	0.000872188					870	0.00553413
871	-0.000482241					871	-0.00236738					871	-0.00159888					871	-0.000467027		871	-0.00154469		871	-0.00137944		871	0.000388988					871	0.00219968					871	0.00652507
872	-7.27479e-05					872	-0.00207608					872	-0.00092602					872	-4.46436e-05		872	-0.00194774		872	-0.000629107		872	-0.000123113					872	0.00336712					872	0.00593608
873	-0.000763255					873	-0.00118479					873	-0.000813157					873	0.00108774		873	-0.000400801		873	0.000541221		873	-0.000275213					873	0.00381457					873	0.00424708
874	-0.000363762					874	-7.34967e-05					874	-0.000910293					874	0.00111012		874	0.000256143		874	0.000661549		874	-0.00129731					874	0.00335201					874	0.00118808
875	-0.00011427					875	-9.22034e-05					875	-0.000876795					875	0.00154278		875	-0.000356913		875	0.00130188		875	-0.00115948					875	0.00309945					875	-0.00251092
876	-0.000335406					876	-5.09177e-05					876	-0.000160118					876	0.00131679		876	4.32335e-06		876	0.00214312		876	-0.000532014					876	0.00259812					876	-0.00516921
877	-0.000606687					877	-0.000609634					877	0.000896559					877	0.00105081		877	-0.000405757		877	0.00205457		877	-0.000304542					877	0.00228708					877	-0.00534734
878	-0.00122797					878	-0.00052835					878	0.00236324					878	0.000454822		878	-0.00192584		878	0.00175602		878	-0.000887071					878	0.000836046					878	-0.00292547
879	-0.00242925					879	-0.000397066					879	0.00350991					879	0.00115884		879	-0.00418592		879	0.00156748		879	0.000540401					879	0.000595008					879	-0.000413604
880	-0.00288053					880	-0.000115782					880	0.00421679					880	0.000592935		880	-0.005386		880	0.00176893		880	0.000907875					880	0.000833969					880	0.00305827
881	-0.00144239					881	1.57271e-05					881	0.00513741					881	8.86256e-05		881	-0.00552083		881	0.00237124		881	0.000725403					881	0.00112486					881	0.0049508
882	-0.000494499					882	2.73363e-05					882	0.00403803					882	-0.000695684		882	-0.00425776		882	0.00134393		882	0.00121293					882	0.000636602					882	0.00574362
883	0.00058339					883	-0.000131055					883	0.00264865					883	-0.00149999		883	-0.00366469		883	4.66242e-05		883	0.00249046					883	0.00197834					883	0.00395644
884	0.000771278					884	-0.000129445					884	0.00205928					884	-0.0016543		884	-0.00162162		884	-0.000740684		884	0.00171799					884	0.00275009					884	0.00192927
885	0.00155917					885	-0.000137836					885	0.000869899					885	-0.000718613		885	0.000661448		885	-0.000837993		885	0.000845516					885	0.00290183					885	-0.000827912
886	0.00110663					886	0.000174171					886	-0.000766167					886	-0.000791324		886	0.000831394		886	-0.000994563		886	0.000233464					886	0.00251549					886	-0.00174453
887	-0.000606212					887	0.000296472					887	-0.001392					887	-0.000343922		887	0.000479032		887	-0.000160588		887	-0.000808559					887	0.00322058					887	0.000159261
888	-0.000919057					888	0.000528774					888	-0.000777827					888	0.00044348		888	0.00159667		888	0.000993387		888	-0.00134058					888	0.00248567					888	0.00263305
889	0.000288098					889	0.000521075					889	-0.000253656					889	0.000450883		889	0.00178431		889	0.00201736		889	-0.000512604					889	0.00131076					889	0.00561685
890	-0.000164748					890	0.00123338					890	-0.000249486					890	0.000358285		890	0.00223195		890	0.00168134		890	-0.000164627					890	0.000145854					890	0.00789064
891	-0.000687893					891	0.00124615					891	-0.00109293					891	0.000777133		891	0.00265786		891	0.00096591		891	-0.000206047					891	-0.000147689					891	0.00830481
892	0.000738603					892	0.00113947					892	-0.000285832					892	0.000446305		892	0.00318173		892	0.000751196		892	0.00107267					892	-0.000309602					892	0.00616945
893	0.0015951					893	0.0015928					893	-0.000898737					893	-0.000484523		893	0.0032656		893	0.00141648		893	0.00203138					893	-0.00118152					893	0.00478409
894	0.0011116					894	0.00217613					894	-0.00142164					894	-0.00097535		894	0.00283947		894	0.00136177		894	0.0018501					894	-0.00161343					894	0.00314872
895	0.000698092					895	0.00181946					895	-0.00107455					895	-0.00168618		895	0.00176334		895	0.00194705		895	0.00250881					895	-0.00149534					895	0.000683357
896	0.000614377					896	0.00311318					896	-0.000825753					896	-0.00237572		896	0.00127621		896	0.00205277		896	0.0027682					896	-0.00159643					896	-0.00169186
897	-6.97531e-05					897	0.00326768					897	-0.00140623					897	-0.00204472		897	0.00010712		897	0.00252933		897	0.00168788					897	-0.00201589					897	-0.00304677
898	-6.38835e-05					898	0.00250218					898	-0.000986712					898	-0.00136372		898	-0.000661967		898	0.0017559		898	0.00065755					898	-0.00118536					898	-0.00410169
899	0.000441986					899	0.00209669					899	-0.000537191					899	-0.000582712		899	-0.000671054		899	0.00173246		899	0.000407226					899	-0.000204821					899	-0.0038466
900	0.00103786					900	0.00110119					900	-0.00137767					900	-0.000171708		900	0.00134986		900	0.000749025		900	0.000636901					900	0.000225715					900	-0.00228152
901	0.000963579					901	-0.000464079					901	-0.00163694					901	0.00172042		901	0.00284017		901	0.000205845		901	0.00193712					901	5.67587e-05					901	-0.00182644
902	0.00125878					902	-0.000938522					902	-0.00254534					902	0.00284335		902	0.00382836		902	-0.000296418		902	0.00215773					902	-0.00120038					902	-0.00276138
903	-0.024626					903	-0.025253					903	-0.0213237					903	-0.00180371		903	-0.00153346		903	-0.00453868		903	-0.0220017					903	-0.0196875					903	-0.0163063
904	-0.0947108					904	-0.0956474					904	-0.0679921					904	-0.0124408		904	-0.0143153		904	-0.0160109		904	-0.088901					904	-0.0705947					904	-0.0530213
905	-0.203376					905	-0.205472					905	-0.136481					905	-0.0252478		905	-0.0322771		905	-0.0293932		905	-0.19194					905	-0.149872					905	-0.106826
906	-0.33983					906	-0.344276					906	-0.222018					906	-0.039314		906	-0.0504392		906	-0.0442254		906	-0.322329					906	-0.248769					906	-0.173111
907	-0.474256					907	-0.48218					907	-0.302415					907	-0.047369		907	-0.0604736		907	-0.0546366		907	-0.443718					907	-0.345744					907	-0.237677
908	-0.557702					908	-0.568413					908	-0.347041					908	-0.043654		908	-0.0569279		908	-0.0544478		908	-0.504957					908	-0.406888					908	-0.275422
909	-0.570387					909	-0.583227					909	-0.346758					909	-0.027679		909	-0.0405823		909	-0.041989		909	-0.485385					909	-0.414883					909	-0.276798
910	-0.522233					910	-0.53595					910	-0.309475					910	-0.00396406		910	-0.0154667		910	-0.0216802		910	-0.397844					910	-0.378048					910	-0.248163
911	-0.428568					911	-0.442164					911	-0.245311					911	0.0223517		911	0.0141989		911	0.00325859		911	-0.266842					911	-0.307933					911	-0.196168
912	-0.326574					912	-0.339177					912	-0.180506					912	0.0417588		912	0.0376922		912	0.0229783		912	-0.14489					912	-0.230276					912	-0.139245
913	-0.247031					913	-0.25955					913	-0.134011					913	0.0507859		913	0.0488654		913	0.034448		913	-0.0731675					913	-0.167528					913	-0.0949112
914	-0.192637					914	-0.204173					914	-0.106006					914	0.0482931		914	0.0502786		914	0.0366977		914	-0.0534253					914	-0.125461					914	-0.0634376
915	-0.161103					915	-0.170496					915	-0.0942514					915	0.0366002		915	0.0428118		915	0.0317675		915	-0.0727531					915	-0.101263					915	-0.045714
916	-0.14665					916	-0.154519					916	-0.0923663					916	0.0214378		916	0.029805		916	0.0231672		916	-0.108031					916	-0.0895458					916	-0.0381003
917	-0.140847					917	-0.145861					917	-0.0948404					917	0.00749723		917	0.0162663		917	0.0149076		917	-0.136848					917	-0.0859764					917	-0.037858
918	-0.136094					918	-0.138923					918	-0.0954844					918	-0.000143372		918	0.00634729		918	0.00919813		918	-0.144455					918	-0.0837667					918	-0.0385258
919	-0.129481					919	-0.129746					919	-0.0931884					919	-0.00260398		919	0.00130827		919	0.00787866		919	-0.131662					919	-0.078787					919	-0.0416436
920	-0.119388					920	-0.117968					920	-0.0870224					920	-0.000264583		920	6.9248e-05		920	0.0089392		920	-0.108539					920	-0.0707073					920	-0.0422414
921	-0.106985					921	-0.102651					921	-0.0802063					921	0.00360509		921	0.000880228		921	0.0121397		921	-0.0838164					921	-0.0604476					921	-0.0412892
922	-0.0937129					922	-0.0898827					922	-0.0720695					922	0.00774686		922	0.00226967		922	0.0139708		922	-0.0626629					922	-0.0498162					922	-0.0382485
923	-0.0818509					923	-0.0785848					923	-0.0649527					923	0.00917863		923	0.00431858		923	0.014432		923	-0.0481095					923	-0.0419342					923	-0.0357882
924	-0.0720189					924	-0.0692069					924	-0.0586558					924	0.0109204		924	0.00626749		924	0.0140832		924	-0.0403561					924	-0.0357623					924	-0.0324579
925	-0.0649269					925	-0.0631989					925	-0.052669					925	0.0117722		925	0.0068264		925	0.0123444		925	-0.0365426					925	-0.0319103					925	-0.0289976
926	-0.0593749					926	-0.059851					926	-0.0472522					926	0.010844		926	0.00593532		926	0.00946567		926	-0.0343292					926	-0.0305884					926	-0.0253273
927	-0.0562334					927	-0.056323					927	-0.0428548					927	0.00889822		927	0.00493304		927	0.00766725		927	-0.0332353					927	-0.029215					927	-0.0220984
928	-0.0539024					928	-0.052885					928	-0.0377174					928	0.00696248		928	0.00402005		928	0.00588904		928	-0.0313614					928	-0.0277208					928	-0.0188205
929	-0.0506313					929	-0.0510869					929	-0.0333501					929	0.00511675		929	0.00201706		929	0.00415083		929	-0.0285675					929	-0.0264967					929	-0.0153126
930	-0.0465402					930	-0.0478589					930	-0.0299627					930	0.00334101		930	0.00187406		930	0.00317262		930	-0.0246136					930	-0.0237725					930	-0.0133346
931	-0.0417992					931	-0.0438408					931	-0.0269153					931	0.00316527		931	0.00136107		931	0.00128441		931	-0.0213197					931	-0.0211383					931	-0.0109867
932	-0.0371886					932	-0.0394928					932	-0.0252078					932	0.00350184		932	0.000597202		932	-0.000253567		932	-0.0186354					932	-0.019283					932	-0.00853015
933	-0.0328085					933	-0.0353848					933	-0.0245702					933	0.0046687		933	-0.000277527		933	-0.00113133		933	-0.0179512					933	-0.0172166					933	-0.00733502
934	-0.0290484					934	-0.0301568					934	-0.0233726					934	0.00375557		934	-0.000522255		934	-0.00157909		934	-0.0179969					934	-0.0157202					934	-0.00669989
935	-0.0257683					935	-0.0265888					935	-0.021515					935	0.00300244		935	-0.00210698		935	-0.00200685		935	-0.0185926					935	-0.0148938					935	-0.00642476
936	-0.0238483					936	-0.0245408					936	-0.0201674					936	0.0015393		936	-0.000861713		936	-0.00234461		936	-0.0189183					936	-0.0133874					936	-0.00812964
937	-0.0215086					937	-0.0225629					937	-0.0181498					937	-3.17493e-05		937	0.00022295		937	-0.00215224		937	-0.0184138					937	-0.0119602					937	-0.0102558
938	-0.0199095					938	-0.0212152					938	-0.0169523					938	-0.00163217		938	0.00060665		938	-0.00268967		938	-0.0161892					938	-0.0102216					938	-0.00969393
939	-0.0182105					939	-0.0209375					939	-0.0151748					939	-0.00203259		939	-0.000349651		939	-0.0027171		939	-0.0141846					939	-0.00886305					939	-0.00945209
940	-0.0171414					940	-0.0191297					940	-0.0140773					940	-0.003023		940	0.00113405		940	-0.00193454		940	-0.0124301					940	-0.00738447					940	-0.00924024
941	-0.0157624					941	-0.017852					941	-0.0125697					941	-0.00364342		941	0.000237749		941	-0.00140197		941	-0.0111155					941	-0.00616589					941	-0.00794839
942	-0.0144536					942	-0.0165443					942	-0.0101925					942	-0.003122		942	-0.000878929		942	-0.000989345		942	-0.0104408					942	-0.00518673					942	-0.00692755
943	-0.0126057					943	-0.015057					943	-0.00848533					943	-0.00236959		943	-2.66349e-05		943	-0.000246571		943	-0.010696					943	-0.00515597					943	-0.00758945
944	-0.0123177					944	-0.0131797					944	-0.0080282					944	-0.00133718		944	0.00219566		944	0.000256203		944	-0.0104112					944	-0.00447522					944	-0.00693135
945	-0.0114897					945	-0.0122324					945	-0.00800106					945	-0.000434773		945	0.00252795		945	-0.000241024		945	-0.00992646					945	-0.00377447					945	-0.00623325
946	-0.0110518					946	-0.0107151					946	-0.00710393					946	0.00142764		946	0.00255025		946	0.00046175		946	-0.0100017					946	-0.00328372					946	-0.00652515
947	-0.010604					947	-0.00934787					947	-0.00726717					947	0.00144161		947	0.00237236		947	0.000584537		947	-0.00905686					947	-0.00257264					947	-0.00661768
948	-0.0101971					948	-0.00871118					948	-0.00672072					948	0.00124696		948	0.000253409		948	0.0011574		948	-0.00803198					948	-0.00234974					948	-0.00633379
949	-0.00903032					949	-0.00825448					949	-0.00635428					949	0.000832312		949	-0.00195554		949	0.000620256		949	-0.0067671					949	-0.00130683					949	-0.0063199
950	-0.00785349					950	-0.00768779					950	-0.00595784					950	0.000547661		950	-0.00380448		950	0.000993116		950	-0.00663222					950	-0.000603929					950	-0.006776
951	-0.00604666					951	-0.00709109					951	-0.0054314					951	-0.00026699		951	-0.00321343		951	0.00113598		951	-0.00551734					951	-0.000571023					951	-0.00679211
952	-0.00544988					952	-0.00670442					952	-0.00536538					952	-0.00112037		952	-0.00280241		952	0.000458833		952	-0.00548245					952	-0.000958051					952	-0.00660836
953	-0.00552424					953	-0.00634853					953	-0.00474994					953	-0.000251967		953	-0.00147243		953	0.000521657		953	-0.00505756					953	-0.000613011					953	-0.00633902
954	-0.00578861					954	-0.00628264					954	-0.0032945					954	-0.000263566		954	0.000357552		954	0.00039448		954	-0.00513267					954	-0.00116797					954	-0.00537967
955	-0.00623297					955	-0.00597675					955	-0.00249906					955	-0.000115164		955	0.00162753		955	-0.000262696		955	-0.00380777					955	-0.00183293					955	-0.00311033
956	-0.00756734					956	-0.00599085					956	-0.00264362					956	0.000303237		956	0.000707512		956	-0.000669873		956	-0.00266288					956	-0.00268789					956	-9.09827e-05
957	-0.0070817					957	-0.00623496					957	-0.00288858					957	0.00176259		957	0.000197492		957	0.00031295		957	-0.00148801					957	-0.00256285					957	0.00323836
958	-0.0057372					958	-0.00637997					958	-0.00277445					958	0.000844153		958	-0.000363358		958	-0.000874372		958	-0.00205319					958	-0.00189588					958	0.00536349
959	-0.00509281					959	-0.00610507					959	-0.00409032					959	0.00172572		959	-0.00139429		959	-0.000641708		959	-0.00232838					959	-0.00149872					959	0.00673821
960	-0.00417842					960	-0.00633016					960	-0.00496619					960	0.00183728		960	-0.00183521		960	-0.000749044		960	-0.00261357					960	-0.00182156					960	0.00755293
961	-0.00325402					961	-0.00589526					961	-0.00492206					961	0.00105885		961	-0.00166614		961	-0.00098638		961	-0.00248875					961	-0.00105441					961	0.00507765
962	-0.00296963					962	-0.00552036					962	-0.00420823					962	0.00113102		962	-0.000917072		962	-0.00178372		962	-0.00234397					962	-0.00147725					962	0.00197238
963	-0.00306627					963	-0.00439639					963	-0.00463572					963	0.00131586		963	-0.00073859		963	-0.00142126		963	-0.00107932					963	-0.00134842					963	-0.000376691
964	-0.00276317					964	-0.00378266					964	-0.00345321					964	0.000570702		964	-0.000800262		964	-0.00108885		964	-0.000474679					964	-0.00156916					964	-0.00303674
965	-0.00274007					965	-0.00273893					965	-0.0021007					965	0.000995544		965	-0.000451933		965	-0.00102645		965	-0.000150035					965	-0.000679895					965	-0.00676679
966	-0.00263698					966	-0.0016852					966	-0.000468186					966	0.00119039		966	-0.000273604		966	-0.000834044		966	-0.000165391					966	-0.000700632					966	-0.00654685
967	-0.00298388					967	-0.00102147					967	-0.000615804					967	0.000895455		967	-0.00154528		967	-0.00034164		967	3.92351e-05					967	-1.13694e-05					967	-0.0063569
968	-0.00346169					968	-0.000768663					968	-4.52181e-05					968	0.00153369		968	-0.00207734		968	-0.00020944		968	-0.000256384					968	0.000179386					968	-0.00515031
969	-0.00374994					969	-3.62954e-05					969	-0.000234633					969	0.00215192		969	-0.00221958		969	-0.000907339		969	-0.000662002					969	0.00112086					969	-0.00376533
970	-0.00379819					970	-0.000513928					970	-0.000374047					970	0.00272015		970	-0.00230183		970	-0.00134524		970	-0.000657621					970	0.00113233					970	-0.00219035
971	-0.00348644					971	-0.00104156					971	-0.00166346					971	0.00397838		971	-0.00199408		971	-0.00186314		971	-0.00098324					971	0.000533809					971	-0.000285376
972	-0.00283469					972	-0.00158919					972	-0.00227288					972	0.00409661		972	-0.000706329		972	-0.00169104		972	-0.00145886					972	0.000205283					972	0.0015896
973	-0.00221372					973	-0.000817681					973	-0.00211441					973	0.00407817		973	0.00127119		973	-0.0011391		973	-0.00115478					973	0.000748034					973	0.00161183
974	-0.00219337					974	-0.00129685					974	-0.00194605					974	0.0040699		974	0.00202853		974	2.70896e-06		974	-0.000940719					974	0.000521802					974	-0.000778143
975	-0.00236301					975	-0.000406027					975	-0.0012677					975	0.00337164		975	0.00206587		975	0.000664516		975	-0.00125666					975	0.000465571					975	-0.00151811
976	-0.00236266					976	-0.0004852					976	-0.00135934					976	0.000693368		976	0.00138322		976	0.00171632		976	-0.0014726					976	0.00179934					976	-0.00234808
977	-0.00297231					977	-0.000254373					977	-0.000400988					977	0.0007151		977	0.00134056		977	0.00164813		977	-0.00172853					977	0.00162311					977	-0.00335805
978	-0.00329259					978	-0.00127427					978	-0.000284674					978	0.000239844		978	0.000167788		978	0.00111982		978	-0.00201464					978	0.000317787					978	-0.00413014
979	-0.00282368					979	-0.0012051					979	-0.000388768					979	-1.48103e-05		979	0.000474881		979	0.000131375		979	-0.00155078					979	-0.00120636					979	-0.00331495
980	-0.00244478					980	-0.00160592					980	-0.00142286					980	0.000860535		980	0.000621974		980	0.000292926		980	-0.000846926					980	-0.00160051					980	-0.00251975
981	-0.00223587					981	-0.00207675					981	-0.000886955					981	0.00301588		981	0.00113907		981	3.44772e-05		981	-0.000273069					981	-0.00208466					981	-0.00387456
982	-0.00197696					982	-0.00193758					982	-0.000481049					982	0.00330123		982	0.000986161		982	0.000196028		982	0.000330789					982	-0.000138808					982	-0.00391937
983	-0.00120848					983	-0.00162891					983	-0.000336943					983	0.00326923		983	0.000523201		983	0.0007975		983	-5.25059e-06					983	0.0015776					983	-0.00370563
984	-0.000580912					984	-0.00109134					984	-0.000193548					984	0.00274827		984	-0.000269871		984	0.0009388		984	-0.00073125					984	0.00292522					984	-0.003155
985	-0.000533345					985	-0.000523763					985	0.000559846					985	0.00178732		985	-2.94349e-06		985	0.000550101		985	-0.00039725					985	0.00353283					985	-0.00469438
986	-0.000615779					986	0.000353813					986	4.32406e-05					986	0.00150637		986	-0.000346016		986	-0.000638598		986	-0.00116325					986	0.00343045					986	-0.00492375
987	-0.000158213					987	0.00169139					987	-0.00167336					987	0.000715418		987	-0.000849088		987	-0.0013373		987	-0.00199925					987	0.00167806					987	-0.00522312
988	-0.000110854					988	0.00189869					988	-0.00144145					988	0.00088669		988	0.000457795		988	-0.00210605		988	-0.00119488					988	0.000495889					988	-0.00464331
989	0.000385678					989	0.00143489					989	-0.000800527					989	0.000689444		989	0.0019545		989	-0.002625		989	0.000159733					989	-0.000375434					989	-0.00333674
990	0.00125221					990	0.00160109					990	-0.000369603					990	0.000692198		990	0.00133121		990	-0.00192396		990	0.000864347					990	-0.000906757					990	0.000149829
991	0.00119874					991	0.00118729					991	-1.86778e-05					991	0.000534952		991	0.000307916		991	-0.000142914		991	0.00230896					991	-6.80807e-05					991	0.0028564
992	0.00141527					992	0.000113486					992	0.00130225					992	0.000627706		992	0.000294623		992	0.00105813		992	0.00243357					992	0.000300596					992	0.00448297
993	0.00155174					993	-4.04186e-05					993	0.00107204					993	0.000312225		993	-0.000558702		993	0.00224916		993	0.00149873					993	0.000799262					993	0.00502926
994	0.00042753					994	0.000134508					994	0.000860625					994	0.00133863		994	-0.0017124		994	0.00304998		994	0.000704474					994	0.000887807					994	0.00456243
995	-0.000266681					995	-1.05655e-05					995	0.00038921					995	0.00237504		995	-0.0015561		995	0.0022108		995	0.000230215					995	0.000406351					995	0.0021056
996	-0.000150893					996	0.000364361					996	0.000657794					996	0.00316144		996	-0.000189792		996	0.000301621		996	0.000685957					996	-0.000945104					996	0.00187877
997	-0.000475105					997	6.92875e-05					997	0.000926379					997	0.00284785		997	8.65119e-05		997	-0.00102756		997	0.0011417					997	-0.00079656					997	0.00294194
998	0.000360683					998	-0.000345786					998	0.000914125					998	0.00317556		998	-7.71845e-05		998	-0.00178674		998	0.00128797					998	-0.000728016					998	0.0027951
999	0.000625936					999	-0.000222063					999	0.000620425					999	0.00329551		999	-0.000731372		999	-0.00204612		999	0.000755173					999	0.000199189					999	0.0028055
1000	0.000291167					1000	-0.000868387					1000	0.000526725					1000	0.00228546		1000	-0.000835578		1000	-0.00187552		1000	0.00101237					1000	0.00030634					1000	0.00328578
1001	-0.000303601					1001	-0.00188471					1001	-0.000426976					1001	0.00190541		1001	-0.000889785		1001	-0.00080491		1001	-0.000460429					1001	0.00125349					1001	0.00116606
1002	-0.00035837					1002	-0.00208104					1002	-0.000790676					1002	0.00325536		1002	-0.000523991		1002	0.000275697		1002	8.67696e-05					1002	0.00123064					1002	-0.00303365
1003	-0.00145314					1003	-0.00222736					1003	-0.00113496					1003	0.00369614		1003	-9.81977e-05		1003	0.000136303		1003	0.000834378					1003	0.000677796					1003	-0.00475337
1004	-0.00145823					1004	-0.00208465					1004	-0.00142098					1004	0.00388941		1004	0.000767258		1004	0.000506752		1004	0.00141321					1004	-0.00051731					1004	-0.00589519
1005	-0.000173374					1005	-0.00135211					1005	-0.002357					1005	0.00428268		1005	0.000572651		1005	0.00140717		1005	0.000902048					1005	-0.00122283					1005	-0.00530739
1006	0.000871478					1006	-0.000229581					1006	-0.00203303					1006	0.00357595		1006	0.000338044		1006	0.00138759		1006	0.00116088					1006	-0.00212836					1006	-0.0038596
1007	0.000316331					1007	0.000152953					1007	-0.00160905					1007	0.00328922		1007	-0.00111656		1007	0.000668012		1007	-9.02811e-05					1007	-0.00257388					1007	-0.0016118
1008	0.000121183					1008	-2.45139e-05					1008	-0.000985367					1008	0.00348288		1008	-0.00119117		1008	0.000378432		1008	-0.000551219					1008	-0.00247941					1008	0.000305989
1009	-4.40716e-05					1009	-0.000402577					1009	-0.000723586					1009	0.0030791		1009	-0.000695919		1009	-0.000301263		1009	0.000449314					1009	-0.00278769					1009	0.00279235
1010	-0.00130937					1010	-0.000710865					1010	0.000428195					1010	0.00200532		1010	-0.000630723		1010	-0.000891002		1010	0.000939846					1010	-0.00208701					1010	0.00428817
1011	-0.00102466					1011	9.08458e-05					1011	0.00135998					1011	0.00281154		1011	-0.000185527		1011	-0.000870741		1011	0.000710379					1011	-0.00191633					1011	0.00489399
1012	0.000620043					1012	0.000832557					1012	0.000521757					1012	0.00232777		1012	0.00163967		1012	-0.00019048		1012	0.00154091					1012	-0.00191565					1012	0.00514981
1013	0.000854749					1013	0.00209427					1013	0.000443506					1013	0.00129403		1013	0.00151486		1013	0.000659781		1013	0.00204147					1013	-0.00225497					1013	0.00502563
1014	0.00134952					1014	0.0028057					1014	0.00112337					1014	0.0015527		1014	0.000480109		1014	0.000379954		1014	0.000733653					1014	-0.00161675					1014	0.00383055
1015	0.00220432					1015	0.00336694					1015	0.00073324					1015	0.00343136		1015	0.000945384		1015	0.00120007		1015	-0.000374168					1015	-0.000940112					1015	0.00230488
1016	0.00234913					1016	0.00277818					1016	0.000533107					1016	0.00370003		1016	0.000610659		1016	0.00191019		1016	-0.000691988					1016	0.000326522					1016	0.00144921
1017	0.00158393					1017	0.00182943					1017	0.000982974					1017	0.0043987		1017	-0.000484065		1017	0.0011803		1017	-0.000759808					1017	0.00139316					1017	0.00160354
1018	0.00158874					1018	0.00100067					1018	0.000682841					1018	0.00494736		1018	-0.00092879		1018	0.000730421		1018	-0.000637628					1018	0.00255979					1018	0.00164787
1019	0.00109366					1019	0.000451741					1019	0.00013115					1019	0.00449768		1019	-0.000443431		1019	0.00144046		1019	0.000155892					1019	0.00309462					1019	0.00152161
1020	0.00035869					1020	0.00019263					1020	0.000769287					1020	0.00462818		1020	-0.000577983		1020	0.000620429		1020	0.000279561					1020	0.00241755					1020	0.000254741
1021	-0.000336278					1021	0.000133519					1021	0.000447423					1021	0.00562868		1021	-0.000222535		1021	-0.000459605		1021	0.00041323					1021	0.000820482					1021	-0.000712131
1022	-0.00107125					1022	0.000694408					1022	0.000505559					1022	0.00579917		1022	0.000242913		1022	-0.000249639		1022	-0.0010031					1022	6.34132e-05					1022	-0.000209003
1023	-0.0226062					1023	-0.0167347					1023	-0.0135363					1023	0.00151967		1023	-0.00548164		1023	-0.00574967		1023	-0.0244894					1023	-0.0139637					1023	-0.00981588
1024	-0.0832511					1024	-0.073204					1024	-0.0510794					1024	-0.00865892		1024	-0.0185961		1024	-0.0166198		1024	-0.0878647					1024	-0.056422					1024	-0.0373331
1025	-0.178376					1025	-0.165893					1025	-0.110183					1025	-0.0221773		1025	-0.0335705		1025	-0.03028		1025	-0.1827					1025	-0.124012					1025	-0.0815809
1026	-0.297911					1026	-0.285293					1026	-0.183686					1026	-0.0365156		1026	-0.0502348		1026	-0.0453502		1026	-0.302645					1026	-0.210643					1026	-0.139949
1027	-0.414405					1027	-0.406562					1027	-0.25374					1027	-0.044764		1027	-0.0597292		1027	-0.0559404		1027	-0.41237					1027	-0.298893					1027	-0.194207
1028	-0.48558					1028	-0.485862					1028	-0.294213					1028	-0.0407423		1028	-0.0555735		1028	-0.0543106		1028	-0.466325					1028	-0.356844					1028	-0.214064
1029	-0.493985					1029	-0.502622					1029	-0.294978					1029	-0.0235403		1029	-0.0382678		1029	-0.0423609		1029	-0.443569					1029	-0.366835					1029	-0.199192
1030	-0.448009					1030	-0.462682					1030	-0.260963					1030	0.000961784		1030	-0.0135619		1030	-0.0234813		1030	-0.357593					1030	-0.334908					1030	-0.157421
1031	-0.362914					1031	-0.379611					1031	-0.202008					1031	0.0287539		1031	0.016694		1031	7.82415e-05		1031	-0.229216					1031	-0.270652					1031	-0.0963697
1032	-0.272008					1032	-0.285931					1032	-0.141533					1032	0.049766		1032	0.0397399		1032	0.0196678		1032	-0.1125					1032	-0.196415					1032	-0.0397482
1033	-0.201663					1033	-0.212491					1033	-0.0975577					1033	0.0585582		1033	0.0508158		1033	0.0311274		1033	-0.044774					1033	-0.136768					1033	-0.00808682
1034	-0.154627					1034	-0.162701					1034	-0.0730235					1034	0.0558302		1034	0.0502617		1034	0.0342469		1034	-0.0281873					1034	-0.0969022					1034	0.00488454
1035	-0.129031					1035	-0.134232					1035	-0.0637898					1035	0.0429721		1035	0.0414079		1035	0.0313363		1035	-0.0509					1035	-0.0759282					1035	0.00508545
1036	-0.117765					1036	-0.121672					1036	-0.0656662					1036	0.026354		1036	0.025774		1036	0.0244256		1036	-0.0890027					1036	-0.0680043					1036	-0.00246364
1037	-0.1131					1037	-0.116613					1037	-0.0712126					1037	0.0119759		1037	0.0111202		1037	0.0163549		1037	-0.118895					1037	-0.0687303					1037	-0.0131827
1038	-0.109764					1038	-0.112463					1038	-0.074559					1038	0.00405786		1038	0.00128636		1038	0.0107842		1038	-0.127638					1038	-0.0706464					1038	-0.0222018
1039	-0.104948					1039	-0.105373					1039	-0.0733359					1039	0.0016594		1039	-0.00277748		1039	0.0101636		1039	-0.115591					1039	-0.0688624					1039	-0.0292509
1040	-0.095612					1040	-0.0965145					1040	-0.0688535					1040	0.00548043		1040	-0.00295101		1040	0.0121226		1040	-0.0915024					1040	-0.0614308					1040	-0.0318503
1041	-0.0841859					1041	-0.0851954					1041	-0.0624712					1041	0.0100515		1041	0.00164546		1041	0.0146217		1041	-0.0680542					1041	-0.0526691					1041	-0.0311096
1042	-0.0734099					1042	-0.0744764					1042	-0.0554388					1042	0.0140825		1042	0.00508192		1042	0.0172407		1042	-0.0487261					1042	-0.0432375					1042	-0.028309
1043	-0.0643338					1043	-0.0651173					1043	-0.0493865					1043	0.0160935		1043	0.00738839		1043	0.0182398		1043	-0.0354979					1043	-0.0346458					1043	-0.0266484
1044	-0.0561278					1044	-0.0581483					1044	-0.0445745					1044	0.0176541		1044	0.00894486		1044	0.0171288		1044	-0.0294395					1044	-0.0292342					1044	-0.0233177
1045	-0.0503414					1045	-0.0514297					1045	-0.0402433					1045	0.0161735		1045	0.00988163		1045	0.0152276		1045	-0.0266506					1045	-0.0257142					1045	-0.0206471
1046	-0.0466351					1046	-0.0471313					1046	-0.0359821					1046	0.012293		1046	0.00774843		1046	0.0132263		1046	-0.0254616					1046	-0.0232345					1046	-0.0172365
1047	-0.0435788					1047	-0.0432528					1047	-0.0323209					1047	0.00751246		1047	0.00580524		1047	0.0111651		1047	-0.0256427					1047	-0.0219948					1047	-0.013356
1048	-0.0403524					1048	-0.0409643					1048	-0.0279197					1048	0.00206193		1048	0.00485204		1048	0.00941383		1048	-0.0253938					1048	-0.0201451					1048	-0.00906536
1049	-0.0366861					1049	-0.0390558					1049	-0.0243987					1049	-0.00360906		1049	0.00434885		1049	0.00738257		1049	-0.0233547					1049	-0.0183354					1049	-0.00647477
1050	-0.0331095					1050	-0.0368579					1050	-0.0208986					1050	-0.00712184		1050	0.00268594		1050	0.00526106		1050	-0.0221252					1050	-0.0176769					1050	-0.00313404
1051	-0.0296228					1051	-0.03349					1051	-0.0182584					1051	-0.00839462		1051	0.00348312		1051	0.00271946		1051	-0.0196756					1051	-0.0167887					1051	-0.00236326
1052	-0.0256262					1052	-0.0299521					1052	-0.0167083					1052	-0.00956741		1052	0.00354029		1052	0.00142787		1052	-0.0172961					1052	-0.0148806					1052	-0.00219249
1053	-0.0226096					1053	-0.0262043					1053	-0.0159381					1053	-0.00956019		1053	0.00329747		1053	0.000146271		1053	-0.0165365					1053	-0.0137725					1053	-0.00339171
1054	-0.0211729					1054	-0.0223864					1054	-0.0129981					1054	-0.0104532		1054	0.00235465		1054	0.000524676		1054	-0.016977					1054	-0.0113944					1054	-0.00489094
1055	-0.0189461					1055	-0.018829					1055	-0.0111689					1055	-0.0104889		1055	0.00199209		1055	0.000672837		1055	-0.0162669					1055	-0.00856704					1055	-0.00669989
1056	-0.0168491					1056	-0.0174818					1056	-0.00930968					1056	-0.0103946		1056	0.000779668		1056	0.000950871		1056	-0.0163469					1056	-0.00665015					1056	-0.00764869
1057	-0.0152922					1057	-0.0163546					1057	-0.00769048					1057	-0.0103604		1057	0.000247249		1057	5.89056e-05		1057	-0.0159969					1057	-0.00627326					1057	-0.0080275
1058	-0.0136252					1058	-0.0146374					1058	-0.00607127					1058	-0.0107361		1058	0.000474829		1058	-0.00017306		1058	-0.0144569					1058	-0.00679637					1058	-0.00661631
1059	-0.0115783					1059	-0.0126403					1059	-0.00616207					1059	-0.0103918		1059	0.00148241		1059	-0.000385026		1059	-0.0123069					1059	-0.00714948					1059	-0.00509512
1060	-0.0100912					1060	-0.0120934					1060	-0.00618367					1060	-0.010411		1060	0.00192022		1060	-0.000907208		1060	-0.0109665					1060	-0.00771306					1060	-0.00436358
1061	-0.00833392					1061	-0.010327					1061	-0.00674529					1061	-0.0104403		1061	0.00148824		1061	-0.000769577		1061	-0.00997617					1061	-0.00765706					1061	-0.00198174
1062	-0.00696666					1062	-0.00892049					1062	-0.00665691					1062	-0.0110896		1062	0.00136626		1062	-0.000391945		1062	-0.00949582					1062	-0.00679106					1062	-0.0007699
1063	-0.0067194					1063	-0.007294					1063	-0.00711853					1063	-0.010599		1063	-0.000175724		1063	0.000235686		1063	-0.00907547					1063	-0.00522505					1063	-0.000828061
1064	-0.00688214					1064	-0.00694752					1064	-0.00767016					1064	-0.00996827		1064	-0.00109771		1064	0.000133318		1064	-0.00981513					1064	-0.00413905					1064	-0.000416221
1065	-0.00704474					1065	-0.00671136					1065	-0.00753239					1065	-0.0100912		1065	-0.00149949		1065	0.000370768		1065	-0.0104346					1065	-0.00309327					1065	0.000645986
1066	-0.00699715					1066	-0.00613563					1066	-0.00626472					1066	-0.00983486		1066	-0.000871004		1066	0.00105797		1066	-0.0100941					1066	-0.0026878					1066	-0.000321297
1067	-0.00705956					1067	-0.0054699					1067	-0.00520706					1067	-0.00773847		1067	-0.000692517		1067	0.000905163		1067	-0.00993356					1067	-0.00215234					1067	-0.000718579
1068	-0.00623197					1068	-0.00627417					1068	-0.0037094					1068	-0.00591209		1068	0.000895971		1068	-3.764e-05		1068	-0.00952303					1068	-0.00187687					1068	-5.58617e-05
1069	-0.00498438					1069	-0.00570844					1069	-0.00260173					1069	-0.0048057		1069	0.000684459		1069	-0.00109044		1069	-0.00758249					1069	-0.0015714					1069	0.00126686
1070	-0.00504669					1070	-0.00427296					1070	-0.00157451					1070	-0.00431296		1070	0.000373098		1070	-0.00166338		1070	-0.00632193					1070	-0.00179599					1070	0.00284991
1071	-0.00539876					1071	-0.00449803					1071	-0.00144745					1071	-0.00492154		1071	-0.000427911		1071	-0.00200665		1071	-0.00539136					1071	-0.00132071					1071	0.00447373
1072	-0.00633084					1072	-0.0042831					1072	-0.00141038					1072	-0.00684013		1072	-0.00045892		1072	-0.00117992		1072	-0.00426079					1072	-0.000915424					1072	0.00387756
1073	-0.00649291					1073	-0.00342817					1073	-0.00141332					1073	-0.00820871		1073	-0.000929929		1073	-0.00041319		1073	-0.00322022					1073	-0.000900141					1073	0.00252139
1074	-0.00587498					1074	-0.00361324					1074	-0.00117626					1074	-0.0093473		1074	-0.000170938		1074	0.000343542		1074	-0.00306965					1074	-0.00209486					1074	0.00105521
1075	-0.00429699					1075	-0.00276846					1075	-0.0016595					1075	-0.00967937		1075	0.00100815		1075	0.00100018		1075	-0.00246914					1075	-0.00185955					1075	-0.000640717
1076	-0.00455872					1076	-0.00144438					1076	-0.00178292					1076	-0.00980361		1076	0.000817679		1076	0.00120642		1076	-0.00278868					1076	-0.0012841					1076	-0.00221555
1077	-0.00383044					1077	-0.00164029					1077	-0.00245635					1077	-0.00912784		1077	0.00125721		1077	0.00114265		1077	-0.00255821					1077	-0.00157865					1077	-0.000970382
1078	-0.00309216					1078	-0.0018562					1078	-0.00249977					1078	-0.00973208		1078	0.00152673		1078	0.00104888		1078	-0.00312775					1078	-0.0029832					1078	-0.000225215
1079	-0.00193389					1079	-0.00194212					1079	-0.0019132					1079	-0.00923632		1079	0.000756262		1079	0.000595118		1079	-0.00397728					1079	-0.00215775					1079	0.00184995
1080	-0.00167559					1080	-0.00315809					1080	-0.00088681					1080	-0.00866372		1080	-0.000494174		1080	5.13175e-05		1080	-0.00457694					1080	-0.00176227					1080	0.00333522
1081	-0.000146956					1081	-0.00277489					1081	-0.000250611					1081	-0.00815429		1081	-0.000474077		1081	-0.000612991		1081	-0.00399672					1081	-0.0029363					1081	0.00465194
1082	0.000391679					1082	-0.00148169					1082	0.000715588					1082	-0.00692486		1082	-0.000733979		1082	-0.0010473		1082	-0.00366651					1082	-0.00356033					1082	0.00454867
1083	-0.000119686					1083	-0.000398497					1083	-1.82125e-05					1083	-0.00644543		1083	-0.00151388		1083	-0.000961608		1083	-0.00282629					1083	-0.00162437					1083	0.00443539
1084	-0.00134105					1084	0.000154699					1084	-0.000412013					1084	-0.007226		1084	-0.000523784		1084	-0.000815916		1084	-0.000996077					1084	-0.000968401					1084	0.00219211
1085	-0.00122242					1085	0.000407896					1085	-0.000505913					1085	-0.00832926		1085	0.000656314		1085	-0.000560225		1085	0.000173987					1085	-0.00139243					1085	-0.000201161
1086	-0.00128343					1086	0.000350212					1086	-0.00103997					1086	-0.00851684		1086	0.00185698		1086	0.000114916		1086	0.000123807					1086	-0.000245647					1086	-0.00170287
1087	-0.00129443					1087	0.000642475					1087	-0.00192403					1087	-0.00875441		1087	0.00164768		1087	2.3348e-08		1087	0.000263628					1087	9.11887e-05					1087	-0.00270449
1088	-0.000645421					1088	0.000184738					1088	-0.00150809					1088	-0.00845199		1088	0.00175838		1088	-0.000534869		1088	0.000103448					1088	-0.000541975					1088	-0.00264611
1089	-0.000536416					1089	-9.29987e-05					1089	-0.00159215					1089	-0.00783957		1089	0.000659082		1089	-0.00121976		1089	-0.00123673					1089	-0.000755139					1089	-0.00242774
1090	-0.000287411					1090	0.000229264					1090	-0.00181621					1090	-0.00654915		1090	-0.000830217		1090	-0.00127465		1090	-0.00221705					1090	-0.000538303					1090	-0.00104936
1091	-9.80921e-05					1091	-0.00077928					1091	-0.0013203					1091	-0.00631427		1091	-0.000508992		1091	-0.00122004		1091	-0.00199777					1091	-0.0017204					1091	-0.00136955
1092	0.000161294					1092	-0.00116799					1092	-0.000654383					1092	-0.00648939		1092	-0.000807655		1092	-0.00120553		1092	-0.00314849					1092	-0.00217226					1092	-0.00214945
1093	0.00039068					1093	-0.00136671					1093	4.15328e-05					1093	-0.0071945		1093	-0.000966318		1093	4.89874e-05		1093	-0.00356921					1093	-0.00236413					1093	-0.00287935
1094	-1.99347e-05					1094	-0.000455425					1094	5.74482e-05					1094	-0.00637962		1094	-0.000674981		1094	0.0014035		1094	-0.00281993					1094	-0.00338599					1094	-0.00344925
1095	-0.00149055					1095	-0.00092414					1095	0.000823425					1095	-0.0063159		1095	2.63555e-05		1095	0.00131801		1095	-0.00292075					1095	-0.00351786					1095	-0.00432914
1096	-0.00203089					1096	-0.000703551					1096	0.00131975					1096	-0.00572879		1096	-0.00161181		1096	0.00162212		1096	-0.00321215					1096	-0.00231809					1096	-0.00261769
1097	-0.00216111					1097	-0.00176325					1097	0.00138607					1097	-0.00476168		1097	-0.00127977		1097	0.00157605		1097	-0.00317355					1097	-0.000907651					1097	-0.00124567
1098	-0.00153133					1098	-0.00131295					1098	0.000622397					1098	-0.00323457		1098	-0.000457723		1098	-4.00144e-05		1098	-0.00270495					1098	-0.000607208					1098	-0.000623646
1099	-0.00147155					1099	-0.00127265					1099	8.87212e-05					1099	-0.00328746		1099	-0.000195679		1099	-0.00124608		1099	-0.00240635					1099	0.000423235					1099	0.000218375
1100	-0.000161777					1100	3.76476e-05					1100	-0.00106493					1100	-0.00352061		1100	-0.000313636		1100	-0.00148215		1100	-0.00171777					1100	0.000493678					1100	0.0020804
1101	-0.000491764					1101	0.000477442					1101	-0.00130779					1101	-0.00334126		1101	0.000618978		1101	-0.00184855		1101	-0.00116985					1101	0.000126545					1101	0.00273373
1102	-0.000761584					1102	0.000656881					1102	-0.00135065					1102	-0.00353191		1102	0.000721994		1102	-0.00181519		1102	-0.000461927					1102	-0.000548886					1102	0.00254798
1103	-0.0017514					1103	-0.00041368					1103	-0.000693516					1103	-0.00313256		1103	0.000165009		1103	-0.000471838		1103	-0.000204006					1103	-0.000204316					1103	0.00378223
1104	-0.000971225					1104	-0.00115424					1104	0.000163622					1104	-0.00300321		1104	-0.000841975		1104	0.000241518		1104	-0.000896085					1104	-0.000339746					1104	0.00483649
1105	-0.000861045					1105	-0.0015148					1105	0.000270759					1105	-0.00229386		1105	-0.00095896		1105	0.000634875		1105	-0.000798165					1105	-0.000305177					1105	0.00333074
1106	-0.000640667					1106	-0.00186566					1106	-0.000190954					1106	-0.00175145		1106	-0.00143531		1106	0.000837973		1106	-0.00168063					1106	-0.000327736					1106	8.61464e-05
1107	-0.000430065					1107	-0.00100686					1107	0.000257438					1107	-0.00230968		1107	-0.00153095		1107	0.00092078		1107	-0.00221313					1107	-0.000447042					1107	-8.71347e-05
1108	9.05372e-05					1108	-5.80602e-05					1108	0.00050583					1108	-0.00291791		1108	-0.00176658		1108	0.000103587		1108	-0.00208563					1108	0.000253652					1108	-0.00292042
1109	-0.00024886					1109	0.000490741					1109	0.00162422					1109	-0.00323613		1109	-0.000412213		1109	-0.000943607		1109	-0.00137813					1109	0.00105435					1109	-0.0064737
1110	-0.000878258					1110	0.000939541					1110	0.00128261					1110	-0.00352436		1110	0.000402153		1110	-0.0011708		1110	-0.000290624					1110	0.000655039					1110	-0.00755698
1111	-0.00137748					1111	0.00187823					1111	0.000952363					1111	-0.0040284		1111	0.000887218		1111	-0.000928173		1111	0.00158692					1111	0.000538586					1111	-0.00584932
1112	-0.00122638					1112	0.0017267					1112	0.000822451					1112	-0.0033139		1112	0.00118358		1112	-4.58816e-05		1112	0.00280447					1112	0.000397429					1112	-0.00447993
1113	-0.00128527					1113	0.00199517					1113	9.25404e-05					1113	-0.0035194		1113	0.000649942		1113	0.00030641		1113	0.00145202					1113	0.000326273					1113	-0.000580533
1114	-0.000864166					1114	0.00190365					1114	-0.00112737					1114	-0.00306489		1114	4.63045e-05		1114	0.0017487		1114	0.00136957					1114	0.000195117					1114	0.00327886
1115	-0.000233061					1115	0.000862119					1115	-0.000637282					1115	-0.00270039		1115	6.26668e-05		1115	0.00173099		1115	0.000367119					1115	0.00107396					1115	0.00493826
1116	0.000908206					1116	0.000240556					1116	1.41944e-05					1116	-0.00200055		1116	0.000609637		1116	-0.000196824		1116	-0.000404979					1116	0.00160511					1116	0.00546835
1117	0.000510011					1117	0.000388872					1117	-0.000613687					1117	-0.00139287		1117	0.00133863		1117	-0.00187501		1117	0.000193087					1117	0.00175392					1117	0.00416079
1118	-0.000438185					1118	0.000847189					1118	0.000358432					1118	-0.000575197		1118	0.00287762		1118	-0.00206319		1118	0.00205115					1118	0.00158273					1118	0.00135322
1119	-0.00025638					1119	0.00129551					1119	0.00126055					1119	-0.000967519		1119	0.00318661		1119	-0.00277138		1119	0.00215922					1119	0.000911537					1119	0.000395654
1120	-0.000724575					1120	0.00202382					1120	0.00210267					1120	-0.000809842		1120	0.0031156		1120	-0.00187956		1120	0.00168728					1120	0.00122035					1120	0.000408087
1121	-0.000802663					1121	0.00106212					1121	0.00176611					1121	-0.000545725		1121	0.00265489		1121	-0.000757794		1121	0.0011858					1121	0.00164043					1121	0.000560891
1122	0.000100096					1122	2.02643e-05					1122	0.00260055					1122	-0.000854329		1122	0.00233663		1122	0.000303608		1122	-0.000415336					1122	0.00187054					1122	0.00266662
1123	0.000602854					1123	-0.00078159					1123	0.002085					1123	7.70664e-05		1123	0.000758362		1123	0.000735009		1123	-0.00104647					1123	0.000690652					1123	0.00469235
1124	-0.000164387					1124	-0.000323444					1124	0.00235945					1124	0.00154846		1124	0.000370095		1124	0.00077641		1124	-0.00169761					1124	0.00124077					1124	0.00506808
1125	-0.000871628					1125	-0.000905299					1125	0.00205389					1125	0.00250986		1125	-0.000378171		1125	4.78112e-05		1125	-0.00115875					1125	0.000470878					1125	0.00494381
1126	-0.00068887					1126	-0.000137153					1126	0.00202939					1126	0.00260868		1126	-0.00133644		1126	0.000759212		1126	-0.000949438					1126	0.000670991					1126	0.00529954
1127	-0.000894871					1127	-0.000209277					1127	0.00133617					1127	0.00322436		1127	-0.00201257		1127	0.000200301		1127	-0.000399589					1127	0.00200308					1127	0.00487864
1128	-0.000580864					1128	-0.000651403					1128	0.00186296					1128	0.00236003		1128	-0.00121869		1128	-0.000468612		1128	-0.000219739					1128	0.00382524					1128	0.00507776
1129	0.000173143					1129	-0.00132353					1129	0.000899741					1129	0.00154571		1129	-0.00106482		1129	4.24751e-05		1129	0.000180111					1129	0.00336741					1129	0.00566687
1130	0.000897149					1130	-0.000515654					1130	0.000276525					1130	0.000231389		1130	-0.000550937		1130	0.000623562		1130	0.000349961					1130	0.00289957					1130	0.00516599
1131	0.000791156					1131	-0.000167779					1131	-0.000566022					1131	-0.000954673		1131	-0.000187058		1131	0.000254649		1131	0.000380231					1131	0.00122173					1131	0.00365511
1132	0.00184654					1132	-0.000240173					1132	-0.00102723					1132	-0.00174421		1132	-0.000201715		1132	0.000665538		1132	0.00153134					1132	5.44378e-05					1132	0.00156703
1133	0.00293213					1133	-2.26044e-05					1133	-0.00131844					1133	-0.00161375		1133	0.000413837		1133	0.000506398		1133	0.00202245					1133	-0.00113135					1133	-0.000490654
1134	0.00310771					1134	-0.000285036					1134	-0.00104965					1134	-0.00144329		1134	0.000659389		1134	0.000747259		1134	0.00299356					1134	-0.000267145					1134	-0.00263834
1135	0.0033233					1135	-0.000977468					1135	-0.000680855					1135	-0.00039283		1135	0.000344941		1135	0.00109812		1135	0.00197467					1135	0.00134706					1135	-0.000396019
1136	0.00319888					1136	-0.0009199					1136	-0.000741704					1136	0.00141661		1136	0.000450493		1136	0.00127898		1136	0.000916081					1136	0.00315127					1136	0.0010163
1137	0.00227575					1137	0.000457468					1137	3.87446e-05					1137	0.00157234		1137	0.00013706		1137	0.00179972		1137	-0.0016714					1137	0.00341408					1137	0.00208077
1138	0.00144303					1138	0.000194772					1138	-0.000230806					1138	0.00187808		1138	-0.000366046		1138	0.00143041		1138	-0.00285889					1138	0.00368966					1138	0.00435593
1139	0.0013603					1139	-2.79252e-05					1139	-0.000280357					1139	0.00208381		1139	-0.00112915		1139	0.000611106		1139	-0.00378637					1139	0.00377524					1139	0.00763109
1140	0.00215758					1140	0.000409378					1140	-5.99081e-05					1140	0.00188955		1140	-0.000532258		1140	-0.000958199		1140	-0.00276386					1140	0.00324081					1140	0.00753625
1141	0.00248486					1141	-0.000103319					1141	0.00159068					1141	0.00159486		1141	-0.000715364		1141	-0.0012175		1141	-0.000641204					1141	0.00220639					1141	0.00783141
1142	0.0023431					1142	-0.000716132					1142	0.00252253					1142	0.00150636		1142	-0.000227873		1142	-0.0015569		1142	0.000782716					1142	0.00241838					1142	0.00858812
1143	-0.0139081					1143	-0.015789					1143	-0.00718562					1143	-0.00198214		1143	-0.00253004		1143	-0.00375635		1143	-0.0183334					1143	-0.00620598					1143	0.000375713
1144	-0.0650593					1144	-0.0671819					1144	-0.0383238					1144	-0.0112206		1144	-0.0119122		1144	-0.0120358		1144	-0.0760994					1144	-0.0423303					1144	-0.0264667
1145	-0.147051					1145	-0.149875					1145	-0.0873819					1145	-0.0239191		1145	-0.0265344		1145	-0.0236552		1145	-0.163696					1145	-0.101695					1145	-0.0688591
1146	-0.251682					1146	-0.254618					1146	-0.15079					1146	-0.0376976		1146	-0.0424866		1146	-0.0380647		1146	-0.275002					1146	-0.178359					1146	-0.123562
1147	-0.357282					1147	-0.359811					1147	-0.213987					1147	-0.0471398		1147	-0.0565085		1147	-0.0491442		1147	-0.380726					1147	-0.258589					1147	-0.178953
1148	-0.424682					1148	-0.427784					1148	-0.252664					1148	-0.0456221		1148	-0.0615401		1148	-0.0516138		1148	-0.434971					1148	-0.313615					1148	-0.214583
1149	-0.435412					1149	-0.437667					1149	-0.255081					1149	-0.0313143		1149	-0.0511518		1149	-0.0428334		1149	-0.418086					1149	-0.325111					1149	-0.219154
1150	-0.397182					1150	-0.39813					1150	-0.226668					1150	-0.00780653		1150	-0.0298834		1150	-0.0272929		1150	-0.34049					1150	-0.298027					1150	-0.196874
1151	-0.321472					1151	-0.321602					1151	-0.173765					1151	0.0198312		1151	-0.00170508		1151	-0.00530251		1151	-0.219535					1151	-0.240032					1151	-0.152815
1152	-0.235922					1152	-0.237155					1152	-0.116691					1152	0.0433762		1152	0.0264833		1152	0.0145779		1152	-0.102888					1152	-0.172296					1152	-0.101554
1153	-0.16983					1153	-0.171448					1153	-0.0740873					1153	0.0543407		1153	0.0453018		1153	0.0277682		1153	-0.0313418					1153	-0.117165					1153	-0.0596131
1154	-0.125319					1154	-0.128831					1154	-0.0502834					1154	0.0535852		1154	0.0514302		1154	0.0321885		1154	-0.00910503					1154	-0.0794934					1154	-0.032362
1155	-0.101588					1155	-0.106444					1155	-0.0427995					1155	0.0419197		1155	0.0480786		1155	0.0311488		1155	-0.0262083					1155	-0.0586424					1155	-0.0172108
1156	-0.092507					1156	-0.0984974					1156	-0.0464756					1156	0.0262542		1156	0.0367171		1156	0.0249791		1156	-0.0634916					1156	-0.0531613					1156	-0.0132397
1157	-0.0919156					1157	-0.0967704					1157	-0.0544511					1157	0.0104066		1157	0.0215054		1157	0.0171494		1157	-0.0959038					1157	-0.0538087					1157	-0.0175082
1158	-0.0910537					1158	-0.0952933					1158	-0.0613365					1158	3.83533e-05		1158	0.0101636		1158	0.0115896		1158	-0.107536					1158	-0.0559323					1158	-0.0236159
1159	-0.0880317					1159	-0.0912962					1159	-0.062412					1159	-0.00307991		1159	0.00279168		1159	0.0106898		1159	-0.0982876					1159	-0.0564758					1159	-0.0276937
1160	-0.0807898					1160	-0.0830591					1160	-0.0579674					1160	-0.000608168		1160	-0.0010002		1160	0.01279		1160	-0.0771694					1160	-0.0522394					1160	-0.0316514
1161	-0.0716678					1161	-0.072652					1161	-0.0514728					1161	0.00217357		1161	-0.00106207		1161	0.0153202		1161	-0.0541513					1161	-0.0446729					1161	-0.0329191
1162	-0.0604658					1162	-0.0621149					1162	-0.0448779					1162	0.00632387		1162	0.00103593		1162	0.0171904		1162	-0.0342923					1162	-0.0363059					1162	-0.0321467
1163	-0.0509832					1163	-0.0546177					1163	-0.0380729					1163	0.00989333		1163	0.00384331		1163	0.0176805		1163	-0.0224028					1163	-0.0298656					1163	-0.0319338
1164	-0.0443206					1164	-0.0479504					1164	-0.0325979					1164	0.00966279		1164	0.0068807		1164	0.0162006		1164	-0.0166633					1164	-0.0244553					1164	-0.0302808
1165	-0.0401581					1165	-0.0432132					1165	-0.0295929					1165	0.00847226		1165	0.00840808		1165	0.0144508		1165	-0.0156037					1165	-0.0214851					1165	-0.0269679
1166	-0.0361555					1166	-0.0397559					1166	-0.0275879					1166	0.00846172		1166	0.00842546		1166	0.0132809		1166	-0.0177342					1166	-0.0196448					1166	-0.0227449
1167	-0.033773					1167	-0.0374987					1167	-0.0255628					1167	0.00754026		1167	0.00719279		1167	0.012081		1167	-0.021344					1167	-0.0186544					1167	-0.0177519
1168	-0.03221					1168	-0.0344512					1168	-0.0228976					1168	0.00621793		1168	0.00429902		1168	0.0114611		1168	-0.0242231					1168	-0.0180619					1168	-0.0125687
1169	-0.0289571					1169	-0.0306937					1169	-0.0202824					1169	0.00631561		1169	0.00270524		1169	0.0108511		1169	-0.0245221					1169	-0.0177794					1169	-0.00974549
1170	-0.0249442					1170	-0.0275762					1170	-0.0176972					1170	0.00705328		1170	0.00227147		1170	0.00855116		1170	-0.0231312					1170	-0.0174269					1170	-0.00676228
1171	-0.0219312					1171	-0.0250287					1171	-0.015502					1171	0.00583096		1171	0.00245769		1171	0.00503121		1171	-0.0199103					1171	-0.0166543					1171	-0.00720907
1172	-0.0188383					1172	-0.0223312					1172	-0.0140468					1172	0.00516811		1172	0.00348392		1172	0.00302126		1172	-0.0167988					1172	-0.0162718					1172	-0.00841586
1173	-0.0153852					1173	-0.0195434					1173	-0.0134617					1173	0.00505449		1173	0.00383869		1173	0.00165125		1173	-0.0147965					1173	-0.0148187					1173	-0.0111728
1174	-0.0127622					1174	-0.0167956					1174	-0.0128766					1174	0.00444086		1174	0.00309333		1174	0.000181244		1174	-0.0130542					1174	-0.0123155					1174	-0.0131798
1175	-0.0107791					1175	-0.0153578					1175	-0.0120814					1175	0.00389724		1175	0.00207798		1175	0.000451234		1175	-0.0123919					1175	-0.0105222					1175	-0.0146268
1176	-0.00896602					1176	-0.0145199					1176	-0.0110763					1176	0.00432361		1176	0.00206263		1176	-1.87746e-05		1176	-0.0118596					1176	-0.00958902					1176	-0.0149537
1177	-0.00775294					1177	-0.0126121					1177	-0.00972128					1177	0.00343976		1177	0.00186728		1177	-0.000998784		1177	-0.0112469					1177	-0.00888581					1177	-0.0160107
1178	-0.00750993					1178	-0.0110339					1178	-0.00837647					1178	0.00330533		1178	0.00168032		1178	-0.00245883		1178	-0.00966319					1178	-0.00854329					1178	-0.0154282
1179	-0.00756694					1179	-0.0109557					1179	-0.00846165					1179	0.00290089		1179	0.00188297		1179	-0.00220888		1179	-0.00940949					1179	-0.00904094					1179	-0.0131458
1180	-0.00704395					1180	-0.0102475					1180	-0.00774684					1180	0.00261646		1180	0.00273562		1180	-0.00250893		1180	-0.00718579					1180	-0.0087586					1180	-0.0129734
1181	-0.00658096					1181	-0.00853922					1181	-0.00727202					1181	0.00161202		1181	0.00290828		1181	-0.00168899		1181	-0.00611209					1181	-0.00836625					1181	-0.010301
1182	-0.00633796					1182	-0.00820098					1182	-0.0064173					1182	0.00197754		1182	0.00303093		1182	-0.00117904		1182	-0.00575815					1182	-0.0071139					1182	-0.00507858
1183	-0.00506519					1183	-0.00752239					1183	-0.00658304					1183	0.00153278		1183	0.00314192		1183	-0.000869115		1183	-0.00524306					1183	-0.00603322					1183	-0.0012069
1184	-0.0046225					1184	-0.00667364					1184	-0.00588878					1184	0.00146803		1184	0.00333216		1184	-0.000929198		1184	-0.00426797					1184	-0.0054633					1184	0.00117444
1185	-0.00407982					1185	-0.0065549					1185	-0.00595452					1185	0.00182327		1185	0.0031624		1185	-0.00104928		1185	-0.00526287					1185	-0.00550338					1185	0.00383578
1186	-0.00394714					1186	-0.00697615					1186	-0.00507026					1186	0.00206851		1186	0.00254264		1186	-0.000759364		1186	-0.00546778					1186	-0.00529346					1186	0.00411712
1187	-0.00378446					1187	-0.00699741					1187	-0.00448604					1187	0.00188377		1187	0.00179287		1187	-0.000689448		1187	-0.00495262					1187	-0.00567354					1187	0.00200847
1188	-0.00435208					1188	-0.00579833					1188	-0.00350258					1188	0.00225918		1188	0.0014615		1188	-0.00044954		1188	-0.00377614					1188	-0.00648589					1188	0.000818959
1189	-0.00395994					1189	-0.00489899					1189	-0.00223912					1189	0.00260459		1189	0.000658907		1189	-0.00166964		1189	-0.00395966					1189	-0.00574996					1189	-0.000991195
1190	-0.00392779					1190	-0.00306966					1190	-0.00103566					1190	0.00253		1190	-0.000263688		1190	-0.00155974		1190	-0.00301318					1190	-0.00494402					1190	-0.00105135
1191	-0.00435565					1191	-0.000700327					1191	-0.000652198					1191	0.00280541		1191	-0.000806282		1191	-0.00160984		1191	-0.0028367					1191	-0.00473809					1191	-0.0015015
1192	-0.0042335					1192	0.000659007					1192	-0.000298738					1192	0.00280082		1192	-0.00171888		1192	-0.00126994		1192	-0.00323022					1192	-0.00331216					1192	-0.000861656
1193	-0.0040217					1193	-0.000841356					1193	-0.000346253					1193	0.00222681		1193	-0.00158293		1193	-0.000210036		1193	-0.00404244					1193	-0.00245872					1193	0.000697321
1194	-0.00399033					1194	-0.00224135					1194	-0.000513838					1194	0.00168284		1194	-0.00123878		1194	0.000809863		1194	-0.00300458					1194	-0.00296834					1194	0.000605234
1195	-0.00356895					1195	-0.00267134					1195	-0.000971422					1195	0.00113887		1195	-0.000484627		1195	0.000699762		1195	-0.00258671					1195	-0.00290796					1195	-0.00140685
1196	-0.00258757					1196	-0.00345133					1196	-0.000819007					1196	0.0013749		1196	-0.000160473		1196	0.000789661		1196	-0.00249884					1196	-0.00249757					1196	-0.00247894
1197	-0.00266619					1197	-0.00274132					1197	-0.00158659					1197	0.00202093		1197	9.36809e-05		1197	0.00121956		1197	-0.00198098					1197	-0.00354719					1197	-0.00295103
1198	-0.00300513					1198	-0.00194106					1198	-0.00157523					1198	0.00190777		1198	-0.000683381		1198	0.000649461		1198	-0.00242198					1198	-0.00430916					1198	-0.0044239
1199	-0.00294472					1199	-0.00157029					1199	-0.0013741					1199	0.00214479		1199	-0.000902896		1199	-0.000130635		1199	-0.00300273					1199	-0.00438589					1199	-0.00337836
1200	-0.00298432					1200	-0.00165953					1200	-0.00128298					1200	0.0012318		1200	-0.00189241		1200	0.00029927		1200	-0.00358347					1200	-0.00573261					1200	-0.00168281
1201	-0.00279391					1201	-0.00187876					1201	-0.00158185					1201	0.000688818		1201	-0.00217193		1201	-0.000300826		1201	-0.00386422					1201	-0.00529934					1201	7.27299e-05
1202	-0.0021535					1202	-0.00230799					1202	-0.00161072					1202	-0.000104166		1202	-0.00265144		1202	-0.00122092		1202	-0.00375497					1202	-0.00431607					1202	0.000558273
1203	-0.00158329					1203	-0.00225704					1203	-0.00157067					1203	-0.000226252		1203	-0.00259179		1203	-0.00186102		1203	-0.00249475					1203	-0.00330464					1203	0.00110322
1204	-0.000903817					1204	-0.00181543					1204	-0.00163107					1204	-0.00131795		1204	-0.00208522		1204	-0.00159111		1204	-0.000914118					1204	-0.00260003					1204	0.00143596
1205	-0.000704345					1205	-0.00110381					1205	-0.00146148					1205	-0.00101965		1205	-0.00104865		1205	-0.0024512		1205	-0.000153484					1205	-0.000595432					1205	0.00109869
1206	-0.000804874					1206	-0.0008122					1206	-0.00137188					1206	-0.00116135		1206	-0.000842086		1206	-0.0028213		1206	0.000497151					1206	-0.000870829					1206	0.000531427
1207	-0.000435402					1207	-0.00103059					1207	-0.000872283					1207	-0.000633055		1207	0.000374481		1207	-0.00212139		1207	0.000847785					1207	-0.00137623					1207	0.000364163
1208	0.000234009					1208	-0.000928884					1208	-0.000763662					1208	7.61606e-05		1208	0.00172071		1208	-0.00153148		1208	0.000329225					1208	-0.00204257					1208	-0.000723406
1209	0.000902841					1209	-0.00104634					1209	-0.00160574					1209	0.00185603		1209	0.00132362		1209	-0.0010715		1209	-0.00124876					1209	-0.00201812					1209	-0.00206392
1210	0.00134167					1210	-0.00131379					1210	-0.00176781					1210	0.0027359		1210	-0.000153457		1210	-0.00107153		1210	-0.00186674					1210	-0.00248366					1210	-0.00255443
1211	0.0018905					1211	-0.00133125					1211	-0.00197989					1211	0.00304577		1211	-0.000870539		1211	0.000158443		1211	-0.00165473					1211	-0.0028592					1211	-0.00300495
1212	0.00213934					1212	-0.0022987					1212	-0.00207197					1212	0.00302564		1212	-0.00112762		1212	-0.000201584		1212	-0.000682715					1212	-0.00318474					1212	-0.00329546
1213	0.00202817					1213	-0.00241616					1213	-0.00130477					1213	0.00297637		1213	-0.0015847		1213	-0.00082161		1213	-0.000640056					1213	-0.00282029					1213	-0.00267598
1214	0.000966628					1214	-0.00158262					1214	-0.000668417					1214	0.00194808		1214	-0.00120497		1214	-0.00114143		1214	-0.000106662					1214	-0.00264649					1214	-0.00221003
1215	-0.000114922					1215	-0.00188905					1215	0.00037794					1215	0.000719788		1215	-0.000515327		1215	-0.00116124		1215	-0.000263267					1215	-0.00305297					1215	-0.00318418
1216	-0.000256473					1216	-0.00171548					1216	0.000884296					1216	0.000471497		1216	1.43202e-05		1216	-0.00208105		1216	0.000120127					1216	-0.00200944					1216	-0.00467832
1217	-0.000368023					1217	-0.00100192					1217	0.00125065					1217	0.000693205		1217	0.000123967		1217	-0.00213086		1217	-0.00122648					1217	-0.00168592					1217	-0.00553247
1218	-7.95732e-05					1218	-0.00145835					1218	6.56606e-06					1218	0.00113562		1218	-0.000306386		1218	-0.00109067		1218	-0.0015626					1218	-0.0010624					1218	-0.00668661
1219	0.000698631					1219	-0.00108377					1219	-0.000528346					1219	0.00195935		1219	-0.000899021		1219	-0.000450127		1219	-0.00104783					1219	-0.00112795					1219	-0.00729402
1220	0.00118679					1220	0.000420984					1220	-0.000833259					1220	0.00286307		1220	-0.00051204		1220	0.00144048		1220	-0.000773057					1220	-0.00185503					1220	-0.00715197
1221	0.000524956					1221	0.00123574					1221	-0.000258171					1221	0.0027268		1221	7.49412e-05		1221	0.00295108		1221	-0.00136828					1221	-0.00244211					1221	-0.00510993
1222	0.000603119					1222	0.00136049					1222	-0.000213083					1222	0.00270053		1222	0.000621922		1222	0.00378169		1222	-0.00126351					1222	-0.00155919					1222	-0.00279789
1223	0.000611282					1223	0.00128525					1223	0.000541779					1223	0.00217475		1223	0.000978904		1223	0.00359229		1223	-0.0011284					1223	-0.00134627					1223	-0.00153584
1224	-0.000770743					1224	-5.8936e-05					1224	0.000445902					1224	0.000780606		1224	0.00120444		1224	0.00344336		1224	-0.0022322					1224	-0.000970313					1224	-0.000876511
1225	-0.000772835					1225	-0.00136274					1225	0.000700025					1225	0.00071646		1225	0.00145947		1225	0.00220458		1225	-0.00141599					1225	1.31618e-05					1225	-0.000308148
1226	-0.000864927					1226	-0.00175654					1226	4.41472e-05					1226	0.00162231		1226	-0.000175505		1226	0.0012358		1226	-0.00139978					1226	0.000756636					1226	-0.00169979
1227	-0.00102702					1227	-0.00220035					1227	-1.17302e-05					1227	0.00157817		1227	-0.000250479		1227	0.000777027		1227	-0.00100357					1227	0.000380111					1227	-0.00392142
1228	-0.00155911					1228	-0.00130415					1228	-0.000227687					1228	0.00114427		1228	-0.000585454		1228	0.00017825		1228	-0.000727165					1228	0.000323586					1228	-0.00425306
1229	-0.00106133					1229	0.00013311					1229	0.000675759					1229	0.00214228		1229	-0.000361292		1229	-0.00077009		1229	0.000710741					1229	-0.000177816					1229	-0.00395677
1230	-0.000503629					1230	0.000971026					1230	8.92055e-05					1230	0.00159029		1230	-0.000597662		1230	-0.000548162		1230	-2.13522e-05					1230	-0.000332223					1230	-0.00282176
1231	-5.92691e-06					1231	0.00120894					1231	0.000342651					1231	0.0013283		1231	0.000815967		1231	-0.000136234		1231	0.000786554					1231	-0.00033663					1231	2.32434e-05
1232	-0.00133822					1232	0.00242686					1232	0.000266097					1232	0.0010163		1232	-0.000340404		1232	-7.43065e-05		1232	0.00103446					1232	7.89636e-05					1232	0.00237825
1233	-0.00145052					1233	0.00212477					1233	-0.000280457					1233	0.00130431		1233	-0.00205677		1233	0.000587621		1233	0.000972367					1233	0.000944557					1233	0.00309326
1234	-0.000342831					1234	0.0014237					1234	0.000152561					1234	0.00131444		1234	-0.00137354		1234	0.00108993		1234	0.000172321					1234	0.00114699					1234	0.00346681
1235	0.000214851					1235	-0.000196371					1235	0.000475578					1235	0.00226456		1235	-0.000750701		1235	0.000132611		1235	0.000752274					1235	0.000646249					1235	0.00388889
1236	0.000172533					1236	-0.000766439					1236	0.000308595					1236	0.00155468		1236	-0.000407862		1236	0.000105295		1236	0.000962228					1236	-0.000154487					1236	0.00413098
1237	0.00159022					1237	-0.000366506					1237	0.000681612					1237	0.00143481		1237	0.000154977		1237	0.000767979		1237	0.00100218					1237	-0.000275224					1237	0.00415307
1238	0.0016879					1238	-0.000176574					1238	0.00150463					1238	0.000944929		1238	0.00170782		1238	-0.000249337		1238	0.00117214					1238	0.00012404					1238	0.00412515
1239	0.00082566					1239	8.41924e-05					1239	0.000887438					1239	-0.000493167		1239	0.000850664		1239	-0.00086635		1239	0.0018441					1239	0.00086142					1239	0.00225625
1240	0.000233554					1240	0.000826313					1240	1.02186e-05					1240	-0.00214103		1240	-0.000136475		1240	-0.000292868		1240	0.000966331					1240	0.00265574					1240	-0.000254274
1241	0.000241448					1241	0.000378434					1241	-0.000257001					1241	-0.00254889		1241	-0.000403613		1241	-0.000319387		1241	0.000448562					1241	0.00328007					1241	-0.00314479
1242	0.000789342					1242	-0.000619445					1242	-0.00116422					1242	-0.00183675		1242	0.000659248		1242	-0.000835906		1242	0.000460793					1242	0.00301439					1242	-0.00426531
1243	0.000177236					1243	-0.000517324					1243	-0.000911439					1243	-0.00115461		1243	0.00125211		1243	0.000237575		1243	0.000273024					1243	0.00151872					1243	-0.00499584
1244	-0.000594779					1244	-0.000464586					1244	-0.000958741					1244	0.000648994		1244	0.00121516		1244	0.00143128		1244	-0.00058295					1244	0.000501971					1244	-0.00309698
1245	-0.000436536					1245	-3.01134e-05					1245	-0.000486068					1245	0.00128304		1245	0.00123875		1245	0.0011656		1245	-0.000328377					1245	0.000222227					1245	-0.000849866
1246	8.17073e-05					1246	-0.000115641					1246	0.000236605					1246	0.00187709		1246	0.000562344		1246	0.00080992		1246	-0.000513804					1246	0.000102482					1246	0.00129725
1247	0.00020995					1247	-0.000471169					1247	0.00121928					1247	0.00156114		1247	-7.4066e-05		1247	0.000304241		1247	-0.00110923					1247	-0.000287262					1247	0.00254436
1248	0.00144819					1248	-0.000276696					1248	0.00104195					1248	0.000695189		1248	-8.04757e-05		1248	-0.000221437		1248	-0.000144658					1248	-0.000347006					1248	0.00401147
1249	0.0018565					1249	-0.000151858					1249	0.00169466					1249	-0.000859583		1249	-0.000106716		1249	-0.00148699		1249	0.000221461					1249	5.27202e-05					1249	0.00483828
1250	0.000635183					1250	-8.484e-05					1250	0.00190738					1250	-0.000493719		1250	0.000398051		1250	-0.0011318		1250	0.00125841					1250	-0.000880704					1250	0.00558332
1251	0.000763866					1251	9.21779e-05					1251	0.0010401					1251	-0.000287856		1251	0.000632819		1251	2.33957e-05		1251	0.00164536					1251	-0.00149413					1251	0.00468835
1252	0.000542549					1252	0.000989196					1252	0.000792827					1252	-0.00133199		1252	0.000867586		1252	0.00127859		1252	0.00120231					1252	-0.000797552					1252	0.00293339
1253	0.000261233					1253	0.00127621					1253	0.000915551					1253	-0.00124613		1253	0.000962354		1253	0.00146378		1253	0.000519265					1253	-0.000130977					1253	0.00126842
1254	0.000569926					1254	0.0019333					1254	-0.000851694					1254	0.000360647		1254	0.000887157		1254	0.002469		1254	0.000607484					1254	-0.00026448					1254	-0.000556591
1255	0.000579031					1255	0.00273303					1255	-0.00113891					1255	0.000338222		1255	0.000663361		1255	0.00285508		1255	-0.000133188					1255	0.000228928					1255	-0.0013535
1256	-7.18638e-05					1256	0.00353277					1256	-0.00091613					1256	0.000745797		1256	0.00149957		1256	0.00212117		1256	-0.00032386					1256	0.00166234					1256	-0.000880414
1257	-0.000632759					1257	0.0020125					1257	-0.00165335					1257	0.00171337		1257	0.000305769		1257	0.00136725		1257	-0.000314532					1257	0.00128574					1257	-0.00142732
1258	-0.000753654					1258	0.00125224					1258	-0.00160057					1258	0.00216095		1258	-0.000838027		1258	0.000353336		1258	-0.000215204					1258	0.00191915					1258	-0.00132424
1259	-0.00125455					1259	0.000791973					1259	0.000472238					1259	0.00121919		1259	-0.00131182		1259	-0.000410579		1259	-0.00053492					1259	0.00214256					1259	-0.00201115
1260	2.48711e-05					1260	0.000794103					1260	0.00116507					1260	0.000358374		1260	-0.00129431		1260	-0.000313731		1260	0.000226703					1260	0.00131352					1260	-0.00346976
1261	0.000994324					1261	0.000446481					1261	0.00138791					1261	-0.00133244		1261	-0.00207667		1261	-0.000156804		1261	0.000898325					1261	0.000204229					1261	-0.00477855
1262	0.000703777					1262	0.00234886					1262	0.00274075					1262	-0.00287326		1262	-0.00144903		1262	0.000920123		1262	0.00133995					1262	0.000214936					1262	-0.00431733
1263	-0.0101668					1263	-0.00837876					1263	-0.00422642					1263	-0.00728408		1263	-0.00464138		1263	-0.00103295		1263	-0.0142484					1263	-0.00723436					1263	-0.0110661
1264	-0.0518273					1264	-0.0510364					1264	-0.0304435					1264	-0.0162145		1264	-0.0153437		1264	-0.00962602		1264	-0.0653061					1264	-0.0359237					1264	-0.0332449
1265	-0.123748					1265	-0.122712					1265	-0.0734905					1265	-0.0277438		1265	-0.028965		1265	-0.0222885		1265	-0.146572					1265	-0.0865249					1265	-0.0690151
1266	-0.215688					1266	-0.215517					1266	-0.128538					1266	-0.0400031		1266	-0.043986		1266	-0.0368408		1266	-0.249388					1266	-0.154187					1266	-0.115396
1267	-0.309978					1267	-0.310323					1267	-0.184885					1267	-0.0493125		1267	-0.057067		1267	-0.0487231		1267	-0.349195					1267	-0.227368					1267	-0.163546
1268	-0.373268					1268	-0.374718					1268	-0.221552					1268	-0.0481318		1268	-0.0595079		1268	-0.0506854		1268	-0.405021					1268	-0.28043					1268	-0.193897
1269	-0.385709					1269	-0.386863					1269	-0.225708					1269	-0.0356009		1269	-0.0461189		1269	-0.0417378		1269	-0.393497					1269	-0.294732					1269	-0.195577
1270	-0.352299					1270	-0.352707					1270	-0.200045					1270	-0.0135489		1270	-0.023709		1270	-0.0256196		1270	-0.324191					1270	-0.272515					1270	-0.171709
1271	-0.285449					1271	-0.28315					1271	-0.152292					1271	0.0144031		1271	0.00489138		1271	-0.00457127		1271	-0.213725					1271	-0.220399					1271	-0.127821
1272	-0.207319					1272	-0.204443					1272	-0.101139					1272	0.0379352		1272	0.0311717		1272	0.0139471		1272	-0.100969					1272	-0.155733					1272	-0.0781436
1273	-0.146469					1273	-0.142146					1273	-0.0621054					1273	0.0491272		1273	0.0470121		1273	0.0264554		1273	-0.0279826					1273	-0.101937					1273	-0.0389558
1274	-0.105799					1274	-0.102369					1274	-0.0392321					1274	0.0490793		1274	0.0495925		1274	0.0316338		1274	-0.000846467					1274	-0.0666811					1274	-0.015168
1275	-0.0835987					1275	-0.0827806					1275	-0.0316584					1275	0.0395425		1275	0.0423735		1275	0.0296525		1275	-0.0124584					1275	-0.0484162					1275	-0.00498117
1276	-0.0759886					1276	-0.0771517					1276	-0.0349747					1276	0.0228057		1276	0.0293152		1276	0.0237714		1276	-0.0445403					1276	-0.0437422					1276	-0.004935
1277	-0.0758184					1277	-0.0793128					1277	-0.042031					1277	0.00835897		1277	0.0157368		1277	0.0171804		1277	-0.0759923					1277	-0.0471082					1277	-0.00961883
1278	-0.0777082					1278	-0.0814738					1278	-0.0485573					1278	-0.000677793		1278	0.00582844		1278	0.0116493		1278	-0.0892142					1278	-0.0519342					1278	-0.0141427
1279	-0.0770281					1279	-0.0811449					1279	-0.0506936					1279	-0.00409456		1279	0.00140007		1279	0.00996825		1279	-0.0836162					1279	-0.0520602					1279	-0.0172765
1280	-0.0725579					1280	-0.0755152					1280	-0.0481295					1280	-0.00271029		1280	0.000372242		1280	0.0123274		1280	-0.0634262					1280	-0.047877					1280	-0.018091
1281	-0.0647076					1281	-0.0672345					1281	-0.0434553					1281	0.00118404		1281	0.00209511		1281	0.0154669		1281	-0.0406062					1281	-0.0413448					1281	-0.0179763
1282	-0.0556473					1282	-0.0581639					1282	-0.0366311					1282	0.00522836		1282	0.00483797		1282	0.0180263		1282	-0.0224461					1282	-0.0337626					1282	-0.0184116
1283	-0.047247					1283	-0.0504032					1283	-0.0301868					1283	0.00813269		1283	0.00666084		1283	0.0188057		1283	-0.012276					1283	-0.0274403					1283	-0.0184869
1284	-0.0406567					1284	-0.0428225					1284	-0.0257726					1284	0.00947701		1284	0.0079937		1284	0.0181952		1284	-0.00756598					1284	-0.0215381					1284	-0.0156922
1285	-0.0354664					1285	-0.0377614					1285	-0.0234679					1285	0.00867214		1285	0.00867694		1285	0.0162848		1285	-0.00765432					1285	-0.0176564					1285	-0.014278
1286	-0.032276					1286	-0.0343492					1286	-0.0211331					1286	0.00742743		1286	0.00782098		1286	0.0132346		1286	-0.00978234					1286	-0.0155058					1286	-0.0136047
1287	-0.0305556					1287	-0.0315471					1287	-0.0190082					1287	0.00489271		1287	0.00609502		1287	0.0102145		1287	-0.0122704					1287	-0.0128751					1287	-0.0114813
1288	-0.0276852					1288	-0.0285049					1288	-0.0169934					1288	0.003318		1288	0.00495906		1288	0.00872433		1288	-0.0147884					1288	-0.0106045					1288	-0.00863805
1289	-0.0245049					1289	-0.0259727					1289	-0.0154785					1289	0.00331328		1289	0.0040031		1289	0.00726419		1289	-0.0152064					1289	-0.0105139					1289	-0.00635474
1290	-0.0212045					1290	-0.0233803					1290	-0.0133231					1290	0.00301916		1290	0.00275736		1290	0.00621411		1290	-0.0149731					1290	-0.0100035					1290	-0.00404169
1291	-0.0177841					1291	-0.0201369					1291	-0.0114775					1291	0.00302528		1291	0.00289252		1291	0.00573429		1291	-0.0145292					1291	-0.0096942					1291	-0.00370967
1292	-0.0145937					1292	-0.0163835					1292	-0.0111919					1292	0.0033914		1292	0.00288768		1292	0.00624448		1292	-0.0137954					1292	-0.0107049					1292	-0.00390766
1293	-0.0120033					1293	-0.01347					1293	-0.0108963					1293	0.00294751		1293	0.00251284		1293	0.00555466		1293	-0.0122616					1293	-0.0108156					1293	-0.00405564
1294	-0.00959291					1294	-0.0124366					1294	-0.00945071					1294	0.00141363		1294	0.00135801		1294	0.00423485		1294	-0.0112677					1294	-0.00905631					1294	-0.00465363
1295	-0.00756252					1295	-0.0110031					1295	-0.00823457					1295	0.000370163		1295	0.000213249		1295	0.00136505		1295	-0.00949283					1295	-0.00718711					1295	-0.0052417
1296	-0.00710215					1296	-0.0105186					1296	-0.00789809					1296	-0.000633021		1296	-0.00183052		1296	-0.000374516		1296	-0.00807722					1296	-0.00589893					1296	-0.00238087
1297	-0.00680179					1297	-0.0104242					1297	-0.0066616					1297	-0.000876205		1297	-0.00220428		1297	-0.00266409		1297	-0.00733161					1297	-0.00416076					1297	0.000289961
1298	-0.00621143					1298	-0.00986973					1298	-0.00677512					1298	-0.000919389		1298	-0.00283805		1298	-0.00454366		1298	-0.00589599					1298	-0.00355259					1298	0.00107079
1299	-0.00597106					1299	-0.00825527					1299	-0.00662863					1299	-0.000942573		1299	-0.00266182		1299	-0.00521323		1299	-0.00541038					1299	-0.00445442					1299	-0.00104838
1300	-0.0057407					1300	-0.00697081					1300	-0.00627166					1300	-0.000825482		1300	-0.00194559		1300	-0.0041928		1300	-0.00555394					1300	-0.00458625					1300	-0.00294755
1301	-0.00500042					1301	-0.00643558					1301	-0.00533417					1301	-2.80961e-05		1301	-0.00108838		1301	-0.00379222		1301	-0.00488662					1301	-0.00425894					1301	-0.00527776
1302	-0.00374014					1302	-0.00669032					1302	-0.00532669					1302	-0.00034071		1302	-0.00154113		1302	-0.00295164		1302	-0.00392931					1302	-0.00358166					1302	-0.00689802
1303	-0.00366986					1303	-0.00681506					1303	-0.0044592					1303	-0.000143324		1303	-0.000283878		1303	-0.00206105		1303	-0.00364199					1303	-0.00247439					1303	-0.00757828
1304	-0.00340958					1304	-0.0063998					1304	-0.00457171					1304	0.000174061		1304	0.000623373		1304	-0.00177047		1304	-0.00322467					1304	-0.00170712					1304	-0.00558854
1305	-0.00387931					1305	-0.00553454					1305	-0.00482382					1305	0.000231608		1305	0.00215062		1305	-0.00170988		1305	-0.00255675					1305	-0.000969847					1305	-0.0038088
1306	-0.00307914					1306	-0.0042588					1306	-0.00451521					1306	9.94338e-05		1306	0.00216868		1306	-0.00170923		1306	-0.0020978					1306	-0.000183142					1306	-0.000639887
1307	-0.003319					1307	-0.00386296					1307	-0.00376661					1307	0.000207259		1307	0.0022069		1307	-0.00129858		1307	-0.00267885					1307	-0.000336546					1307	0.00131886
1308	-0.00357887					1308	-0.00302713					1308	-0.002328					1308	-0.000644915		1308	0.00141512		1308	-0.000777921		1308	-0.0023999					1308	-7.99506e-05					1308	0.00249762
1309	-0.00370873					1309	-0.0017213					1309	-0.000789394					1309	-0.00108709		1309	0.00104333		1309	0.000392735		1309	-0.00241095					1309	-0.000233355					1309	0.00322637
1310	-0.00392859					1310	-0.00178547					1310	0.000339522					1310	-0.00113919		1310	0.00022155		1310	0.000553392		1310	-0.00169161					1310	-0.00054676					1310	0.00456512
1311	-0.00548859					1311	-0.00192939					1311	0.000829367					1311	-0.00177105		1311	-0.000119577		1311	0.00151404		1311	-0.00152111					1311	-0.00029049					1311	0.00389323
1312	-0.00449864					1312	-0.00146322					1312	0.000659212					1312	-0.00230291		1312	-0.000330447		1312	0.00119468		1312	-0.000880597					1312	0.000665651					1312	0.00321109
1313	-0.00409869					1313	-0.00163705					1313	-0.000510943					1313	-0.00133477		1313	-0.000571317		1313	0.00170532		1313	-0.000840089					1313	0.000441793					1313	0.00174895
1314	-0.00370874					1314	-0.00217087					1314	-0.0015911					1314	-0.000516633		1314	-0.000972188		1314	0.000965964		1314	6.04186e-05					1314	-2.06565e-06					1314	-0.000473191
1315	-0.0031188					1315	-0.0017047					1315	-0.00181107					1315	-0.000558465		1315	-0.00168306		1315	0.000696606		1315	0.000121124					1315	-0.000535924					1315	-0.00247533
1316	-0.002079					1316	-0.000828466					1316	-0.00230987					1316	-0.000950108		1316	-0.00178341		1316	-0.000512812		1316	-0.000276883					1316	-0.00211992					1316	-0.00368795
1317	-0.0036193					1317	0.000767814					1317	-0.00213866					1317	-0.00023175		1317	-0.00109342		1317	-0.000292271		1317	0.000295109					1317	-0.00328401					1317	-0.00580088
1318	-0.0038996					1318	0.000114095					1318	-0.00136746					1318	-0.000133392		1318	-0.000423429		1318	-0.00194173		1318	0.000897102					1318	-0.0031081					1318	-0.00620381
1319	-0.0035799					1319	0.000390375					1319	-0.000476254					1319	-0.000325035		1319	-0.000533438		1319	-0.00133119		1319	0.00186909					1319	-0.00262219					1319	-0.00548674
1320	-0.0036002					1320	8.66556e-05					1320	-0.00101503					1320	-0.000646674		1320	-0.000173447		1320	-0.00121065		1320	0.00126111					1320	-0.00224628					1320	-0.00453967
1321	-0.00348064					1321	-0.000397123					1321	-0.00156234					1321	0.000151845		1321	0.000326934		1321	-0.000750195		1321	0.00201451					1321	-0.00127037					1321	-0.00392294
1322	-0.00233124					1322	-0.00162097					1322	-0.00151966					1322	-0.000319635		1322	-0.000192265		1322	-0.00132984		1322	0.00284792					1322	-0.00034447					1322	-0.00174656
1323	-0.00164184					1323	-0.000534807					1323	-0.00134698					1323	-0.00120111		1323	-0.000711463		1323	-0.000989485		1323	0.00363132					1323	-0.000628567					1323	-0.00108019
1324	-0.000972442					1324	-0.00049865					1324	-0.000914294					1324	-0.0014926		1324	-0.000720662		1324	-0.00212913		1324	0.00362472					1324	-0.000542665					1324	-0.00100382
1325	-1.30418e-05					1325	0.000127508					1325	-0.000431611					1325	-0.000984075		1325	-0.000869861		1325	-0.00139877		1325	0.00431813					1325	-0.000486763					1325	-0.000237441
1326	0.00088623					1326	0.000543538					1326	0.00010251					1326	-0.00100544		1326	-0.000608757		1326	-0.000568519		1326	0.00399266					1326	-0.00122078					1326	0.00109872
1327	0.00104528					1327	0.00226934					1327	0.000686791					1327	-0.000586792		1327	-0.000407121		1327	1.56428e-06		1327	0.00314731					1327	-0.00235467					1327	-0.000325503
1328	0.00121432					1328	0.00248515					1328	0.000571072					1328	-0.000428144		1328	0.000224514		1328	0.000431647		1328	0.00210197					1328	-0.00229855					1328	0.000430275
1329	0.00159337					1329	0.00218095					1329	-0.000784647					1329	5.04359e-07		1329	0.000766149		1329	0.00134173		1329	0.000366625					1329	-0.00173243					1329	0.00105605
1330	0.00181241					1330	0.000596755					1330	-0.000610366					1330	0.000679152		1330	0.000277785		1330	0.00170181		1330	-0.00067872					1330	-0.00154631					1330	0.00130183
1331	0.00199135					1331	-0.00117758					1331	-0.000174739					1331	0.000697897		1331	-0.00036034		1331	0.00128181		1331	-0.000783499					1331	-0.00109008					1331	0.00119748
1332	0.00167996					1332	-0.00265236					1332	-0.00022874					1332	0.00110667		1332	-6.77211e-05		1332	0.00116153		1332	-0.000218122					1332	-0.000493471					1332	0.00337274
1333	0.000888571					1333	-0.00289714					1333	-0.000932741					1333	0.00162544		1333	0.000154898		1333	0.00093125		1333	0.00104725					1333	-0.000496864					1333	0.003018
1334	-0.000152819					1334	-0.00310193					1334	0.000103258					1334	0.000844211		1334	-0.000302483		1334	0.000610972		1334	0.00217263					1334	2.97433e-05					1334	0.00123326
1335	-0.00080421					1335	-0.00198671					1335	0.000609257					1335	0.000282982		1335	0.000160136		1335	-0.000679307		1335	0.00244801					1335	0.00041635					1335	7.85171e-05
1336	-0.000865681					1336	-0.000501588					1336	0.000416481					1336	0.000431822		1336	-6.71033e-05		1336	-0.000799644		1336	0.00123338					1336	0.000953075					1336	-0.00174629
1337	-0.000837706					1337	-0.000277185					1337	0.000904317					1337	0.000360697		1337	0.000246647		1337	-0.00177039		1337	0.000658758					1337	0.000570619					1337	-0.00370155
1338	-0.000169732					1338	-7.27808e-05					1338	0.00274215					1338	0.000959572		1338	-0.000119604		1338	-0.00205114		1338	-0.000515867					1338	0.000788163					1338	-0.00446681
1339	0.000338242					1339	0.000461623					1339	0.00231999					1339	0.00155845		1339	-0.000255854		1339	-0.00201189		1339	-0.000920493					1339	0.000715707					1339	-0.00255207
1340	0.000436216					1340	0.000276027					1340	0.00123783					1340	0.00193732		1340	0.000267896		1340	-0.00120264		1340	-0.00184512					1340	0.000183251					1340	-0.00225733
1341	-0.00137581					1341	0.000420424					1341	0.00149673					1341	0.00188622		1341	0.00127165		1341	-0.00166339		1341	-0.0019102					1341	-0.000759197					1341	-0.00257259
1342	-0.00132866					1342	0.000573781					1342	0.00120652					1342	0.00113514		1342	0.000736659		1342	-0.00051468		1342	-0.00286566					1342	-0.000250366					1342	-0.0045483
1343	-0.0019815					1343	-0.000292863					1343	0.000406302					1343	0.000354066		1343	1.16643e-05		1343	4.02947e-06		1343	-0.00284112					1343	-0.000951534					1343	-0.00739401
1344	-0.00310434					1344	-0.000729506					1344	0.000126086					1344	0.000262987		1344	0.000706669		1344	-0.000407261		1344	-0.00308658					1344	-0.0017727					1344	-0.00929973
1345	-0.00341718					1345	-0.000576149					1345	0.00038587					1345	0.000561909		1345	-0.000108325		1345	-0.00119855		1345	-0.00217204					1345	-0.00192387					1345	-0.00972544
1346	-0.00191002					1346	-0.000352792					1346	-0.000433488					1346	0.000980805		1346	1.66797e-05		1346	-0.000269842		1346	-0.00105812					1346	-0.00153504					1346	-0.00832115
1347	-0.00139358					1347	-0.000950558					1347	-0.000561723					1347	0.00186967		1347	0.00101278		1347	-0.00116162		1347	1.501e-05					1347	-0.00174462					1347	-0.00478695
1348	-0.000827236					1348	-0.00108847					1348	-0.000349958					1348	0.00144853		1348	0.00219901		1348	-0.00137347		1348	0.000578136					1348	-0.00060399					1348	-0.000742758
1349	-0.000310887					1349	-0.000996375					1349	0.000781808					1349	0.000867392		1349	0.00113525		1349	-0.00112531		1349	0.000521262					1349	-2.33651e-05					1349	0.00147143
1350	0.000705462					1350	-0.000864283					1350	0.000363573					1350	-4.37462e-05		1350	0.00238148		1350	-0.000787153		1350	-0.000665612					1350	0.00042726					1350	0.00366562
1351	-8.18972e-06					1351	-0.000492191					1351	-0.000504033					1351	-0.000444949		1351	0.00194772		1351	-0.000948996		1351	-0.000943037					1351	0.000527885					1351	0.00550981
1352	5.77358e-05					1352	-0.000131174					1352	-0.00067028					1352	-0.000836291		1352	0.000574613		1352	0.000118763		1352	-0.00144165					1352	0.000870607					1352	0.00581439
1353	-0.000246466					1353	0.000549519					1353	-0.000776527					1353	-0.000427634		1353	-0.000668292		1353	0.000946401		1353	-0.00227027					1353	0.00017396					1353	0.0049691
1354	-0.000300668					1354	3.02128e-05					1354	-0.00127277					1354	0.000231023		1354	-0.000231197		1354	0.00112404		1354	-0.00169888					1354	-0.000312688					1354	0.0047138
1355	-0.00106487					1355	-0.000939094					1355	-0.000219022					1355	0.000429681		1355	-0.000834103		1355	0.000771679		1355	0.000262506					1355	-0.000669335					1355	0.0023885
1356	-0.000929071					1356	-0.0019284					1356	0.00120514					1356	8.2664e-06		1356	-0.000917008		1356	0.000229318		1356	0.000703506					1356	-0.00124598					1356	-0.000146792
1357	-0.000753421					1357	-0.00128864					1357	0.00050093					1357	-0.00172344		1357	-0.0006498		1357	-0.000413348		1357	0.000802958					1357	-0.00126021					1357	-0.00083145
1358	0.00025215					1358	-0.000759386					1358	0.00070672					1358	-0.00265514		1358	3.74683e-05		1358	-0.000116179		1358	-9.75894e-05					1358	-0.000373138					1358	-0.000975765
1359	0.000737721					1359	-0.000300131					1359	0.00141251					1359	-0.00362684		1359	0.000504737		1359	0.000730991		1359	-0.00101814					1359	0.000403936					1359	-0.000750079
1360	0.00119329					1360	0.000129124					1360	0.000928302					1360	-0.00324854		1360	-0.000117994		1360	0.000878161		1360	-0.00235868					1360	0.00050101					1360	0.000935606
1361	0.00215886					1361	-4.16204e-05					1361	0.000814263					1361	-0.00299028		1361	-0.000790726		1361	0.00115533		1361	-0.0014994					1361	0.00214808					1361	0.00300129
1362	0.00151449					1362	-0.000883091					1362	0.0012821					1362	-0.00122245		1362	-0.000523672		1362	0.00196226		1362	-0.000571973					1362	0.00175771					1362	0.00623769
1363	0.00060017					1363	-0.0013052					1363	0.000939935					1363	-0.000624614		1363	-0.000466809		1363	0.00104899		1363	0.00154545					1363	0.00118958					1363	0.00821471
1364	0.000305848					1364	-0.000907313					1364	-0.000102229					1364	0.000623218		1364	-0.000559945		1364	0.000205716		1364	0.00275288					1364	-0.000358549					1364	0.00890173
1365	1.52638e-06					1365	-0.000829423					1365	0.000195607					1365	3.10507e-05		1365	-0.000543081		1365	0.00148244		1365	0.00286031					1365	3.32332e-06					1365	0.00813876
1366	0.000207205					1366	-0.000581534					1366	0.000703442					1366	-9.11167e-05		1366	-0.000596218		1366	0.00183917		1366	0.000947737					1366	-0.000174804					1366	0.00596578
1367	0.000273013					1367	-0.000464134					1367	0.000963109					1367	-0.000393766		1367	-0.00187968		1367	0.0003257		1367	0.000353127					1367	0.00100938					1367	0.0023434
1368	0.000989007					1368	8.257e-05					1368	0.000112839					1368	0.000203567		1368	-0.00204361		1368	-0.000328044		1368	-0.000211554					1368	0.00136684					1368	-8.1235e-06
1369	0.001115					1369	-0.000810726					1369	3.2569e-05					1369	-9.90988e-05		1369	-0.00217754		1369	-0.000621787		1369	-0.000766235					1369	0.00272431					1369	-0.00123965
1370	0.000300995					1370	0.000215978					1370	-0.000307701					1370	-0.000921765		1370	-0.00230147		1370	-0.00156553		1370	-0.00136092					1370	0.00229178					1370	-0.00133117
1371	-0.000233011					1371	0.000982682					1371	-0.00140797					1371	-0.00129443		1371	-0.0019854		1371	-0.00170927		1371	-0.000205596					1371	0.00144924					1371	0.000297302
1372	0.000113111					1372	0.00134911					1372	-0.000816821					1372	-0.00172753		1372	0.000260465		1372	-0.000763169		1372	9.77628e-05					1372	0.000648455					1372	0.00112617
1373	4.95431e-05					1373	0.000534877					1373	-0.000265421					1373	-0.00241071		1373	0.000475848		1373	0.000322572		1373	-0.000329225					1373	0.000771869					1373	0.00199599
1374	0.000405975					1374	0.00107064					1374	0.000115979					1374	-0.00255389		1374	0.00154123		1374	0.00121831		1374	-0.00138621					1374	-0.000214718					1374	0.00126581
1375	0.00115241					1375	0.000836411					1375	0.00046738					1375	-0.00102707		1375	0.00205661		1375	0.00127405		1375	-0.0008932					1375	0.000128696					1375	0.000705624
1376	0.00146884					1376	0.000672177					1376	0.00080878					1376	-0.000550243		1376	0.001492		1376	0.0018098		1376	-0.000460187					1376	0.00189211					1376	-0.000824559
1377	0.000815355					1377	0.000677808					1377	-0.000238729					1377	1.623e-05		1377	-7.2687e-05		1377	0.00148544		1377	-0.00118895					1377	0.00267653					1377	-0.00299453
1378	0.000452274					1378	0.0011428					1378	-0.000745841					1378	0.000282576		1378	-0.000537686		1378	0.00160062		1378	-0.00169837					1378	0.00247571					1378	-0.00505351
1379	-0.000480808					1379	0.000497789					1379	-0.00148295					1379	-0.000171078		1379	-0.000862686		1379	0.00076581		1379	-0.000647785					1379	0.00325488					1379	-0.0055025
1380	-0.00089389					1380	9.27789e-05					1380	-0.00233006					1380	-0.00162473		1380	-0.000497685		1380	0.000480995		1380	-0.0003372					1380	0.00370406					1380	-0.00673148
1381	-0.00143697					1381	-0.000182231					1381	-0.00197718					1381	-0.00194839		1381	0.000917315		1381	0.000346179		1381	-0.00131661					1381	0.00199324					1381	-0.00723046
1382	-0.000430028					1382	1.2719e-05					1382	-0.00144348					1382	-0.00189229		1382	0.000992301		1382	0.000631328		1382	-0.000637521					1382	0.0014527					1382	-0.00573938
1383	-0.00782266					1383	-0.00857301					1383	-0.00486927					1383	-0.00444635		1383	-0.00110296		1383	-0.00190413		1383	-0.0152794					1383	-0.004543					1383	-0.00698725
1384	-0.0429953					1384	-0.0430487					1384	-0.0244851					1384	-0.0112004		1384	-0.0107182		1384	-0.00957959		1384	-0.0640412					1384	-0.0323287					1384	-0.0221551
1385	-0.103868					1385	-0.104424					1385	-0.0592109					1385	-0.0204745		1385	-0.0241035		1385	-0.022315		1385	-0.139223					1385	-0.0803444					1385	-0.051523
1386	-0.185331					1386	-0.18568					1386	-0.107297					1386	-0.0333585		1386	-0.0399187		1386	-0.0370205		1386	-0.233855					1386	-0.14207					1386	-0.0924409
1387	-0.271123					1387	-0.271096					1387	-0.158812					1387	-0.0458528		1387	-0.052744		1387	-0.048826		1387	-0.326798					1387	-0.208876					1387	-0.137949
1388	-0.331775					1388	-0.331132					1388	-0.195017					1388	-0.0491172		1388	-0.0566494		1388	-0.0515221		1388	-0.376792					1388	-0.257287					1388	-0.172486
1389	-0.345238					1389	-0.343719					1389	-0.202311					1389	-0.0401516		1389	-0.0463948		1389	-0.0438283		1389	-0.362756					1389	-0.268179					1389	-0.181842
1390	-0.31697					1390	-0.314815					1390	-0.183316					1390	-0.020056		1390	-0.0270602		1390	-0.0260045		1390	-0.29422					1390	-0.24473					1390	-0.164429
1391	-0.256392					1391	-0.253171					1391	-0.14315					1391	0.00745962		1391	0.000124375		1391	-0.0028907		1391	-0.188195					1391	-0.195312					1391	-0.126156
1392	-0.183564					1392	-0.179688					1392	-0.0939847					1392	0.0347251		1392	0.025929		1392	0.0186031		1392	-0.0819598					1392	-0.135123					1392	-0.077523
1393	-0.125736					1393	-0.121035					1393	-0.0546684					1393	0.0512004		1393	0.0423735		1393	0.0305762		1393	-0.0143263					1393	-0.0855213					1393	-0.035339
1394	-0.0879683					1394	-0.0843119					1394	-0.0305421					1394	0.0534758		1394	0.0475581		1394	0.0353892		1394	0.00900717					1394	-0.0530391					1394	-0.0056849
1395	-0.0680802					1395	-0.0663089					1395	-0.0210757					1395	0.0435811		1395	0.0439026		1395	0.0326221		1395	-0.00491936					1395	-0.0361269					1395	0.00879923
1396	-0.0611021					1396	-0.0634759					1396	-0.0229494					1396	0.0278764		1396	0.0331772		1396	0.0240051		1396	-0.0383259					1396	-0.0326046					1396	0.0109234
1397	-0.061634					1397	-0.067403					1397	-0.0305528					1397	0.0115317		1397	0.0210718		1397	0.0142381		1397	-0.070113					1397	-0.0362024					1397	0.0040675
1398	-0.0643957					1398	-0.0716105					1398	-0.0391157					1398	7.6827e-05		1398	0.0114264		1398	0.00860039		1398	-0.0842818					1398	-0.0411182					1398	-0.00416773
1399	-0.0646373					1399	-0.0718081					1399	-0.0436285					1399	-0.00402805		1399	0.00653102		1399	0.00662242		1399	-0.0787206					1399	-0.0434532					1399	-0.0123627
1400	-0.0615189					1400	-0.0669457					1400	-0.0433114					1400	-0.00225292		1400	0.00617566		1400	0.00735445		1400	-0.0599894					1400	-0.0425882					1400	-0.0181477
1401	-0.0562405					1401	-0.0585034					1401	-0.0390442					1401	0.000662208		1401	0.0075703		1401	0.0106365		1401	-0.0381382					1401	-0.0376031					1401	-0.0210926
1402	-0.0501021					1402	-0.050121					1402	-0.033157					1402	0.00330731		1402	0.0101449		1402	0.0137885		1402	-0.0210073					1402	-0.0311181					1402	-0.0210076
1403	-0.0430336					1403	-0.042259					1403	-0.0268292					1403	0.00505231		1403	0.0123297		1403	0.0152299		1403	-0.0113884					1403	-0.0240119					1403	-0.0195021
1404	-0.036905					1404	-0.0359972					1404	-0.0220613					1404	0.0066973		1404	0.0131045		1404	0.0155609		1404	-0.00829938					1404	-0.0181748					1404	-0.0161962
1405	-0.0327163					1405	-0.0314854					1405	-0.0186935					1405	0.0062523		1405	0.0121194		1405	0.0154119		1405	-0.0083004					1405	-0.0135678					1405	-0.0120303
1406	-0.0283577					1406	-0.0280336					1406	-0.0161757					1406	0.00525729		1406	0.0100642		1406	0.0134729		1406	-0.0103314					1406	-0.0111807					1406	-0.00759443
1407	-0.0252491					1407	-0.0250018					1407	-0.0162479					1407	0.00506229		1407	0.00740903		1407	0.0110739		1407	-0.0124225					1407	-0.00922364					1407	-0.00491856
1408	-0.0227104					1408	-0.0230602					1408	-0.0156396					1408	0.00442722		1408	0.005334		1408	0.00850441		1408	-0.0131857					1408	-0.00873599					1408	-0.00323233
1409	-0.0201116					1409	-0.0218589					1409	-0.0146313					1409	0.00308215		1409	0.00458915		1409	0.00566428		1409	-0.0134689					1409	-0.00888766					1409	-0.00406568
1410	-0.0166828					1410	-0.0198576					1410	-0.013813					1410	0.00208708		1410	0.00410429		1410	0.00353415		1410	-0.0142421					1410	-0.00897933					1410	-0.00507904
1411	-0.014664					1411	-0.0181564					1411	-0.0129247					1411	0.00228202		1411	0.00413943		1411	0.00255402		1411	-0.0140253					1411	-0.008981					1411	-0.0076424
1412	-0.0122852					1412	-0.0164051					1412	-0.0103164					1412	0.00146695		1412	0.00310458		1412	0.00257389		1412	-0.0125585					1412	-0.00956267					1412	-0.00797576
1413	-0.0102563					1413	-0.015064					1413	-0.0089978					1413	0.00124189		1413	0.00313986		1413	0.00240334		1413	-0.0113336					1413	-0.00853417					1413	-0.00917888
1414	-0.00914742					1414	-0.0138932					1414	-0.00695917					1414	0.000836824		1414	0.00201543		1414	0.00298198		1414	-0.00996895					1414	-0.00583535					1414	-0.00767153
1415	-0.00823849					1415	-0.0132424					1415	-0.00526055					1415	-1.82372e-05		1415	0.000900997		1415	0.00252062		1415	-0.00754427					1415	-0.00455652					1415	-0.00681419
1416	-0.00718957					1416	-0.0116516					1416	-0.00432193					1416	-0.000243299		1416	0.000746563		1416	0.00154926		1416	-0.00564959					1416	-0.0037877					1416	-0.00587685
1417	-0.00624064					1417	-0.0104007					1417	-0.0042433					1417	0.000111639		1417	0.00203213		1417	1.79072e-05		1417	-0.00458491					1417	-0.00258887					1417	-0.00566951
1418	-0.0055317					1418	-0.00883004					1418	-0.00374455					1418	-0.000543362		1418	0.00210782		1418	-0.00105375		1418	-0.0042619					1418	-0.00288011					1418	-0.00575202
1419	-0.0041327					1419	-0.00765968					1419	-0.00440577					1419	-0.000378348		1419	0.00135392		1419	-0.00185643		1419	-0.00301929					1419	-0.00407156					1419	-0.00563405
1420	-0.00293371					1420	-0.00673931					1420	-0.00485699					1420	0.000396665		1420	0.00162002		1420	-0.00224911		1420	-0.00300669					1420	-0.00406301					1420	-0.00336608
1421	-0.00177471					1421	-0.00662895					1421	-0.0036282					1421	0.000781679		1421	0.00132612		1421	-0.00214179		1421	-0.00274409					1421	-0.00369446					1421	0.000551898
1422	-0.00177572					1422	-0.00583859					1422	-0.00282942					1422	0.00111669		1422	0.00177223		1422	-0.00179447		1422	-0.00224149					1422	-0.00314591					1422	0.00484987
1423	-0.00169672					1423	-0.00545827					1423	-0.00204064					1423	0.00224181		1423	0.000818398		1423	-0.0011473		1423	-0.00167027					1423	-0.00207747					1423	0.0108279
1424	-0.00207771					1424	-0.0048583					1424	-0.00191187					1424	0.00260696		1424	0.00106515		1424	-0.00105141		1424	-0.00171969					1424	-0.000889973					1424	0.0138964
1425	-0.00198869					1425	-0.00443834					1425	-0.00189309					1425	0.00278212		1425	0.00103191		1425	-0.00095551		1425	-0.00220912					1425	7.52901e-06					1425	0.014095
1426	-0.00272968					1426	-0.00387837					1426	-0.00254431					1426	0.00155728		1426	0.00104866		1426	-0.00100961		1426	-0.00166855					1426	-0.000344969					1426	0.0123635
1427	-0.00305067					1427	-0.00364841					1427	-0.00247554					1427	0.000272438		1427	0.000205414		1427	-0.000853715		1427	-0.00198797					1427	-0.00129747					1427	0.00930206
1428	-0.00262166					1428	-0.00297844					1428	-0.00251686					1428	-0.000272283		1428	-6.78327e-05		1428	-0.00129782		1428	-0.00235852					1428	-0.00194997					1428	0.0050606
1429	-0.00264268					1429	-0.00202884					1429	-0.00263825					1429	-0.00112691		1429	-0.000610319		1429	-0.000923419		1429	-0.00243992					1429	-0.00311426					1429	0.00233963
1430	-0.00350371					1430	-0.00149923					1430	-0.00172965					1430	-0.00179154		1430	-0.00110279		1430	-0.00146904		1430	-0.00211133					1430	-0.00448857					1430	0.000958663
1431	-0.00335473					1431	-0.00169963					1431	-0.00123104					1431	-0.00123617		1431	-0.00128527		1431	-0.00162466		1431	-0.00339273					1431	-0.00399289					1431	0.000687698
1432	-0.00276576					1432	-0.00216002					1432	-0.00137244					1432	-0.0010308		1432	-0.00110775		1432	-0.000980283		1432	-0.00351413					1432	-0.00324721					1432	0.00150673
1433	-0.00376678					1433	-0.00290042					1433	-0.00188399					1433	-0.000845298		1433	-0.000860224		1433	-0.000945904		1433	-0.00267641					1433	-0.00341152					1433	0.00216577
1434	-0.00366788					1434	-0.00360109					1434	-0.00214572					1434	0.000250356		1434	0.000128181		1434	-0.00183292		1434	-0.00170974					1434	-0.00257809					1434	0.00225518
1435	-0.002759					1435	-0.00336181					1435	-0.00400745					1435	0.00149601		1435	0.00109672		1435	-0.00144016		1435	-0.000643074					1435	-0.00236499					1435	0.00156464
1436	-0.00225012					1436	-0.00197253					1436	-0.00513918					1436	0.00100166		1436	0.00178526		1436	-0.00074739		1436	-0.000306408					1436	-0.0022319					1436	-0.000165897
1437	-0.00277123					1437	-0.00128324					1437	-0.00539091					1437	0.00101732		1437	0.0011638		1437	-0.00171462		1437	-9.74208e-06					1437	-0.0017288					1437	-0.000296433
1438	-0.00219235					1438	-0.00107396					1438	-0.00473281					1438	0.000973091		1438	0.00117233		1438	-0.00153185		1438	-0.0013537					1438	-0.0011957					1438	-0.000426969
1439	-0.00121357					1439	-0.000994886					1439	-0.00413505					1439	0.000659097		1439	0.000671835		1439	-0.00142033		1439	-0.00251892					1439	-0.00235513					1439	-0.000517236
1440	-0.00146484					1440	-0.00193588					1440	-0.00228728					1440	-6.4897e-05		1440	-0.000568343		1440	-0.00113922		1440	-0.00339413					1440	-0.00186539					1440	0.000742588
1441	-0.0012461					1441	-0.00302688					1441	-0.000949512					1441	0.000321109		1441	-0.00141852		1441	-0.00183812		1441	-0.00303935					1441	-0.00173566					1441	0.00323241
1442	-0.000577358					1442	-0.00256788					1442	-0.000871746					1442	0.000167115		1442	-0.0018487		1442	-0.00149701		1442	-0.00293456					1442	-0.00284592					1442	0.00341223
1443	0.000311381					1443	-0.00139887					1443	-0.00162412					1443	-0.000246788		1443	-0.00136888		1443	-0.0017359		1443	-0.00193017					1443	-0.00405618					1443	0.00340206
1444	-5.00061e-05					1444	-0.00169002					1444	-0.00128702					1444	-0.000270361		1444	-0.000758127		1444	-0.00151582		1444	-0.00128722					1444	-0.00355902					1444	0.00405203
1445	0.000618533					1445	-0.00169126					1445	-0.00105992					1445	-0.000323934		1445	-0.000596838		1445	-0.00184635		1445	-0.00128427					1445	-0.00359335					1445	0.00412209
1446	-0.000212927					1446	-0.0017325					1446	-0.00157282					1446	2.24931e-05		1446	0.000384452		1446	-0.00125687		1446	-0.00100132					1446	-0.00387768					1446	0.00150215
1447	5.6122e-06					1447	-0.00267374					1447	-0.00155573					1447	0.00029892		1447	0.000775741		1447	-0.000887391		1447	-0.00137836					1447	-0.00335202					1447	-0.000887788
1448	0.000514152					1448	-0.00339498					1448	-0.00111871					1448	0.000795396		1448	-0.00034297		1448	-3.79128e-05		1448	-0.000605589					1448	-0.00200635					1448	-0.00260773
1449	0.00135256					1449	-0.00322632					1449	-0.00155244					1449	0.00031231		1449	-0.0014507		1449	0.000430785		1449	-0.000254419					1449	-0.00179276					1449	-0.00502767
1450	0.000810847					1450	-0.00245776					1450	-0.00246617					1450	0.000849225		1450	-0.00045751		1450	0.00109874		1450	0.000566751					1450	-0.00218115					1450	-0.00645762
1451	0.00122913					1451	-0.0018292					1451	-0.00286991					1451	0.000796139		1451	-0.000164316		1451	0.000896695		1451	0.000397921					1451	-0.00216954					1451	-0.00560757
1452	-0.00039258					1452	-0.000930637					1452	-0.00305364					1452	0.00166305		1452	0.00115888		1452	0.00058465		1452	0.000329091					1452	-0.00278793					1452	-0.00488752
1453	-0.00172429					1453	0.000407923					1453	-0.00315737					1453	0.00161997		1453	0.00235207		1453	0.000802605		1453	-9.73958e-06					1453	-0.00285631					1453	-0.00399746
1454	-0.00204613					1454	0.00070642					1454	-0.00315208					1454	0.00127741		1454	0.0024762		1454	0.00102		1454	-0.000470275					1454	-0.00253584					1454	-0.00153746
1455	-0.00226815					1455	0.000484818					1455	-0.00176681					1455	0.000584852		1455	0.00130176		1455	0.00090655		1455	-0.00116084					1455	-0.00102712					1455	0.000402476
1456	-0.00234017					1456	-0.000166783					1456	-0.000821542					1456	0.000182298		1456	-0.000292682		1456	0.000853096		1456	-0.0013114					1456	0.000351593					1456	0.00230241
1457	-0.000672192					1457	-0.00150838					1457	-0.000656271					1457	-0.000330256		1457	-0.00218712		1457	0.000939642		1457	5.80329e-05					1457	0.00157031					1457	0.00383234
1458	-0.000464213					1458	-0.00139999					1458	0.000118999					1458	0.000327191		1458	-0.00267156		1458	0.000126187		1458	4.74687e-05					1458	0.00163903					1458	0.00604227
1459	-0.000706334					1459	-0.000321622					1459	0.000763263					1459	0.0011051		1459	-0.00181527		1459	-0.000667634		1459	0.000245483					1459	0.00168744					1459	0.00633217
1460	0.000491283					1460	-3.33452e-05					1460	-0.000352629					1460	0.00133309		1460	-0.00144706		1460	-0.000402424		1460	0.000193278					1460	0.000795042					1460	0.00590196
1461	0.0005789					1461	0.000224931					1461	-0.00029852					1461	0.00171107		1461	-0.00063884		1461	-0.000297213		1461	0.00119107					1461	-5.73546e-05					1461	0.00441175
1462	0.000306517					1462	0.00150321					1462	0.000625588					1462	0.00173905		1462	-8.06234e-05		1462	-0.000362003		1462	0.000208868					1462	-2.97509e-05					1462	0.00267153
1463	0.000534134					1463	-0.000308516					1463	-0.000300303					1463	0.00129704		1463	0.000867593		1463	-0.000146792		1463	0.000126663					1463	0.000917853					1463	-0.000698676
1464	0.000411684					1464	-0.00169025					1464	7.28072e-05					1464	0.000495398		1464	0.00163632		1464	-0.00048178		1464	0.000153304					1464	0.000945525					1464	-0.00375894
1465	-0.000961134					1465	-0.00182206					1465	0.00117559					1465	1.38865e-05		1465	0.00221777		1465	-0.00191783		1465	0.000729561					1465	-0.000206435					1465	-0.00598952
1466	2.60492e-05					1466	-0.00139386					1466	0.000768363					1466	-0.000247625		1466	0.00151923		1466	-0.00230389		1466	0.000215818					1466	-0.000658395					1466	-0.00597009
1467	-9.6768e-05					1467	-0.00157567					1467	-0.000268859					1467	-0.00117914		1467	0.00168068		1467	-0.00296994		1467	0.000202075					1467	-0.00100035					1467	-0.00333067
1468	-0.000929585					1468	-0.00112748					1468	6.39195e-05					1468	-0.00225065		1468	0.000592138		1468	-0.002776		1468	-0.000281668					1468	-0.00249231					1468	-0.000811239
1469	-0.00150242					1469	-0.000419285					1469	-0.000394274					1469	-0.00207187		1469	-0.000186273		1469	-0.00231209		1469	-0.00136635					1469	-0.0025242					1469	0.00200817
1470	-0.000875738					1470	8.88663e-05					1470	-0.00094303					1470	-0.000772933		1470	-8.12473e-05		1470	-0.000559278		1470	-0.00201157					1470	-0.00117416					1470	0.00355705
1471	-0.00174905					1471	-0.000142983					1471	-0.00123179					1471	-0.000783994		1471	0.000153778		1471	0.000723536		1471	-0.0018468					1471	-0.000764129					1471	0.00373594
1472	-0.00119237					1472	-0.000714832					1472	-0.000950542					1472	-0.000215054		1472	0.000278804		1472	0.00106635		1472	-0.00182202					1472	-0.000184094					1472	0.00124482
1473	4.31316e-06					1473	-0.00158668					1473	-0.0013193					1473	0.00103389		1473	0.000843829		1473	0.000579165		1473	-0.00158724					1473	0.000715941					1473	-0.0023863
1474	0.001291					1474	-0.00149853					1474	-0.00212892					1474	0.00136305		1474	0.000308855		1474	0.00028198		1474	-0.000223139					1474	0.000825976					1474	-0.00599741
1475	0.000867266					1475	-0.00200038					1475	-0.00107935					1475	0.000712412		1475	-9.27832e-05		1475	-6.60629e-05		1475	0.00148034					1475	0.000879652					1475	-0.00841914
1476	0.000533498					1476	-0.00134223					1476	-0.000969779					1476	0.000531778		1476	0.000145874		1476	-0.000684181		1476	0.00182381					1476	0.00104365					1476	-0.00877093
1477	-8.02702e-05					1477	-0.00135409					1477	-0.00073021					1477	0.000741145		1477	0.00112453		1477	-0.0001623		1477	0.00211729					1477	0.00124765					1477	-0.00898272
1478	-0.000314038					1478	-7.59373e-05					1478	-0.00035064					1478	-0.000179489		1478	0.000653188		1478	0.000779582		1478	0.00245076					1478	0.00174165					1478	-0.0081345
1479	-0.00196781					1479	0.000292211					1479	0.00180828					1479	-0.000439964		1479	0.000701845		1479	0.00195146		1479	0.0014438					1479	0.00168564					1479	-0.00588629
1480	-0.00147187					1480	0.00136039					1480	0.00150623					1480	-0.0005102		1480	0.00119332		1480	0.000972751		1480	0.000256187					1480	0.00208422					1480	-0.00366851
1481	-0.000946013					1481	0.00114857					1481	0.00159418					1481	-0.000160436		1481	0.0014355		1481	1.38906e-05		1481	-0.000231426					1481	0.00242393					1481	-0.00372085
1482	-0.000220154					1482	0.00118676					1482	0.00123213					1482	-0.000590673		1482	0.000347687		1482	-0.00019497		1482	9.09605e-05					1482	0.00202365					1482	-0.00147318
1483	0.000575705					1483	0.00127494					1483	0.00104007					1483	-0.000660909		1483	0.00052987		1483	-0.00081383		1483	8.33473e-05					1483	0.00161336					1483	0.00130448
1484	0.00176156					1484	0.000393126					1484	-0.000802434					1484	-0.000541042		1484	0.000482052		1484	-0.000762691		1484	0.000465436					1484	0.00163308					1484	0.00285215
1485	0.00153726					1485	-0.000338638					1485	-0.0023561					1485	-0.00082091		1485	-0.000353629		1485	0.00193806		1485	-0.000273228					1485	0.00152737					1485	0.00338972
1486	0.00147288					1486	-0.000850377					1486	-0.00115976					1486	-0.00164078		1486	-0.00112831		1486	0.00311862		1486	-0.000601893					1486	0.00181381					1486	0.00376725
1487	0.000698503					1487	-0.00138212					1487	-1.34226e-05					1487	-0.000960648		1487	-0.00102299		1487	0.00292919		1487	-0.000200557					1487	0.00228025					1487	0.00313479
1488	0.000814125					1488	-0.00216386					1488	0.00103291					1488	-0.000580517		1488	-0.000877676		1488	0.00254975		1488	-9.92216e-05					1488	0.00184669					1488	0.00398232
1489	0.000159746					1489	-0.0021556					1489	0.00106898					1489	-0.000650324		1489	-0.000712358		1489	0.00156032		1489	0.000131941					1489	0.00155314					1489	0.00488985
1490	0.000105256					1490	-0.00141726					1490	0.00134368					1490	-0.000529826		1490	-0.000495498		1490	-0.000879373		1490	0.000542239					1490	0.00111347					1490	0.00425749
1491	0.00040068					1491	-0.00109888					1491	-0.000181615					1491	0.000360673		1491	0.00089256		1491	-0.00148927		1491	0.000702537					1491	0.000166832					1491	0.00432522
1492	0.0012061					1492	-0.0010205					1492	-0.000816912					1492	0.000551172		1492	0.000350619		1492	-0.000849162		1492	-6.71654e-05					1492	3.01943e-05					1492	0.00360296
1493	0.000471528					1493	0.000257889					1493	-0.000342209					1493	0.000791671		1493	0.000518677		1493	-9.90567e-05		1493	-0.000536868					1493	-0.000306443					1493	0.00137069
1494	0.000396952					1494	0.00123627					1494	0.00033241					1494	0.000962189		1494	0.000136735		1494	0.000531049		1494	-0.000486621					1494	0.000736919					1494	-0.000491583
1495	6.22602e-05					1495	0.000834758					1495	0.000595433					1495	0.000943072		1495	0.000315881		1495	0.000340983		1495	0.000122649					1495	0.0014832					1495	0.00020629
1496	-0.000582577					1496	0.000223365					1496	0.000548455					1496	0.000883956		1496	-0.00028361		1496	8.07015e-05		1496	-0.000268081					1496	0.00276315					1496	0.00060434
1497	-0.00115741					1497	0.00108197					1497	-0.000168522					1497	0.00056484		1497	-7.3101e-05		1497	-0.00053958		1497	-0.000838811					1497	0.0027631					1497	0.00108239
1498	-0.000882252					1498	-0.000299419					1498	-0.000815499					1498	0.00115572		1498	-0.000312592		1498	-0.000489861		1498	-0.000959541					1498	0.00414305					1498	0.00242044
1499	-0.00118709					1499	-0.00103081					1499	-0.000792476					1499	0.00126661		1499	7.79167e-05		1499	-0.000980142		1499	-0.000720271					1499	0.003873					1499	0.00274849
1500	0.000247965					1500	-0.00126211					1500	-0.000271083					1500	0.000977842		1500	-0.000190885		1500	-0.00103052		1500	-0.000131919					1500	0.00357479					1500	0.00190665
1501	0.000462796					1501	-0.000753208					1501	-3.98068e-05					1501	0.000889103		1501	-0.00132825		1501	0.000208888		1501	0.000596366					1501	0.00288041					1501	0.00101505
1502	0.000817626					1502	-0.000274307					1502	0.00110147					1502	-0.000489636		1502	-0.00113562		1502	0.0013283		1502	0.00172465					1502	0.00442604					1502	0.00117345
1503	-0.00542754					1503	-0.00520541					1503	-0.00310725					1503	-0.00396838		1503	-0.00442299		1503	-0.00114229		1503	-0.00997706					1503	-0.000408343					1503	-0.00201815
1504	-0.0347627					1504	-0.0346165					1504	-0.022826					1504	-0.0114871		1504	-0.0148804		1504	-0.00923288		1504	-0.0545388					1504	-0.0247627					1504	-0.0188698
1505	-0.090248					1505	-0.0884675					1505	-0.0567262					1505	-0.0215356		1505	-0.0280674		1505	-0.0206035		1505	-0.125351					1505	-0.0670262					1505	-0.0485713
1506	-0.162553					1506	-0.161668					1506	-0.0998167					1506	-0.034304		1506	-0.0427329		1506	-0.0358343		1506	-0.215754					1506	-0.123786					1506	-0.0881525
1507	-0.241179					1507	-0.240849					1507	-0.146377					1507	-0.0441323		1507	-0.0560285		1507	-0.0487851		1507	-0.306106					1507	-0.188016					1507	-0.130564
1508	-0.299125					1508	-0.29818					1508	-0.178528					1508	-0.0459407		1508	-0.059604		1508	-0.0522759		1508	-0.356649					1508	-0.234366					1508	-0.162725
1509	-0.31356					1509	-0.312571					1509	-0.182818					1509	-0.0375191		1509	-0.0498496		1509	-0.0447468		1509	-0.345222					1509	-0.245356					1509	-0.169296
1510	-0.288426					1510	-0.286641					1510	-0.16236					1510	-0.0183473		1510	-0.031405		1510	-0.0285976		1510	-0.280215					1510	-0.224856					1510	-0.152108
1511	-0.232422					1511	-0.228852					1511	-0.123993					1511	0.00764468		1511	-0.0053591		1511	-0.00670853		1511	-0.176728					1511	-0.178763					1511	-0.116858
1512	-0.163228					1512	-0.158322					1512	-0.0787449					1512	0.0326066		1512	0.0210068		1512	0.0151505		1512	-0.0696517					1512	-0.11977					1512	-0.0732993
1513	-0.106333					1513	-0.102152					1513	-0.0433373					1513	0.0468086		1513	0.0388328		1513	0.0296496		1513	-0.000945066					1513	-0.0710176					1513	-0.0360303
1514	-0.0702594					1514	-0.0669828					1514	-0.0217497					1514	0.0496505		1514	0.0463987		1514	0.0353986		1514	0.0224015					1514	-0.0404947					1514	-0.0116312
1515	-0.0514853					1515	-0.0511032					1515	-0.0143332					1515	0.0405626		1515	0.0442746		1515	0.0338177		1515	0.0074877					1515	-0.0259718					1515	0.00115792
1516	-0.0474116					1516	-0.0498431					1516	-0.0167275					1516	0.0256849		1516	0.0339417		1516	0.0277067		1516	-0.0279764					1516	-0.0239774					1516	0.00608735
1517	-0.050658					1517	-0.0557931					1517	-0.0238018					1517	0.0103271		1517	0.0211889		1517	0.0183357		1517	-0.0626805					1517	-0.030503					1517	0.00438678
1518	-0.0556544					1518	-0.061693					1518	-0.0304861					1518	0.000799355		1518	0.010856		1518	0.0100546		1518	-0.0807647					1518	-0.0370485					1518	0.00120622
1519	-0.0574907					1519	-0.0631029					1519	-0.0348104					1519	-0.0017584		1519	0.00560309		1519	0.00652364		1519	-0.0773788					1519	-0.0387641					1519	-0.000834349
1520	-0.0557871					1520	-0.0598229					1520	-0.0341656					1520	7.39744e-05		1520	0.00478022		1520	0.00662263		1520	-0.0598032					1520	-0.0364696					1520	-0.00228491
1521	-0.0503138					1521	-0.0527424					1521	-0.0302819					1521	0.0038965		1521	0.00718808		1521	0.00762165		1521	-0.0379879					1521	-0.031095					1521	-0.00501519
1522	-0.0435606					1522	-0.0443119					1522	-0.0259282					1522	0.00837902		1522	0.00948607		1522	0.00943068		1522	-0.0206127					1522	-0.0231904					1522	-0.00821541
1523	-0.0362874					1523	-0.0371113					1523	-0.0212845					1523	0.0106015		1523	0.0120041		1523	0.0115797		1523	-0.00944741					1523	-0.0167857					1523	-0.0100256
1524	-0.0304542					1524	-0.0310208					1524	-0.0173207					1524	0.0112241		1524	0.0117721		1524	0.0131287		1524	-0.00550215					1524	-0.0127611					1524	-0.0109859
1525	-0.0251811					1525	-0.0254803					1525	-0.0145877					1525	0.0108267		1525	0.0114901		1525	0.0131877		1525	-0.00567707					1525	-0.0101165					1525	-0.0125161
1526	-0.0215882					1526	-0.0215193					1526	-0.012506					1526	0.00882945		1526	0.0106885		1526	0.0127769		1526	-0.00779233					1526	-0.00853271					1526	-0.0111061
1527	-0.0192255					1527	-0.0205183					1527	-0.0108543					1527	0.00559222		1527	0.010307		1527	0.011996		1527	-0.0103476					1527	-0.00710927					1527	-0.00787594
1528	-0.0175428					1528	-0.0187872					1528	-0.0100026					1528	0.003605		1528	0.00854557		1528	0.00930513		1528	-0.0120129					1528	-0.00595582					1528	-0.00548582
1529	-0.0157301					1529	-0.0172761					1529	-0.00996095					1529	0.00223777		1529	0.00773413		1529	0.00715426		1529	-0.0117481					1529	-0.00502238					1529	-0.00371571
1530	-0.0137474					1530	-0.0156951					1530	-0.00964974					1530	0.0019906		1530	0.00661268		1530	0.0048334		1530	-0.0105835					1530	-0.00430894					1530	-0.000195588
1531	-0.012265					1531	-0.0145837					1531	-0.00965013					1531	0.0016736		1531	0.00524139		1531	0.00280266		1531	-0.00972917					1531	-0.00336706					1531	0.00139474
1532	-0.0103829					1532	-0.011642					1532	-0.00937052					1532	0.0019966		1532	0.00328019		1532	0.00130199		1532	-0.00858486					1532	-0.00335619					1532	0.00201519
1533	-0.00874069					1533	-0.0098404					1533	-0.00890091					1533	0.0015696		1533	0.001429		1533	0.00129133		1533	-0.00655055					1533	-0.00279531					1533	0.00150565
1534	-0.0063185					1534	-0.00947877					1534	-0.0061413					1534	0.00137261		1534	0.0010778		1534	0.000210662		1534	-0.00562624					1534	-0.00190444					1534	-0.000203895
1535	-0.00501632					1535	-0.00920713					1535	-0.00388194					1535	0.000595631		1535	0.000536609		1535	0.000199997		1535	-0.00493197					1535	-0.00150356					1535	-0.00153344
1536	-0.00335441					1536	-0.00899519					1536	-0.00231446					1536	0.000508835		1536	-0.000344617		1536	-0.000210529		1536	-0.004258					1536	-0.00198464					1536	-0.00210282
1537	-0.00200278					1537	-0.00811294					1537	-0.00135699					1537	0.000652039		1537	-0.00171587		1537	-0.000230912		1537	-0.00306403					1537	-0.00172771					1537	-0.00338202
1538	-0.00117115					1538	-0.00801069					1538	-0.00064952					1538	0.000675242		1538	-0.00142713		1538	-0.000931295		1538	-0.00273006					1538	-0.00185078					1538	-0.00349123
1539	-0.00141952					1539	-0.00676843					1539	-0.00130205					1539	-0.000271554		1539	-0.000908389		1539	-0.000901678		1539	-0.00202609					1539	-0.00157385					1539	-0.00300044
1540	-0.00152789					1540	-0.00638618					1540	-0.00165458					1540	-0.000128351		1540	-0.000859646		1540	-0.00185206		1540	-0.00139212					1540	-0.00116692					1540	-0.00318965
1541	-0.000946472					1541	-0.00436368					1541	-0.0013793					1541	-0.000194971		1541	-7.10434e-05		1541	-0.00207231		1541	-0.000908393					1541	-0.000761985					1541	-0.00375873
1542	-0.00129542					1542	-0.00454076					1542	-0.000864022					1542	-0.000171591		1542	0.000777325		1542	-0.00222232		1542	-0.000364667					1542	-0.00124038					1542	-0.0032876
1543	-0.000914368					1543	-0.00317784					1543	-0.00123874					1543	-0.00034821		1543	0.000445694		1543	-0.00142234		1543	-8.09406e-05					1543	-0.000968775					1543	-0.00304647
1544	-0.000963317					1544	-0.00292493					1544	-0.00130347					1544	-0.00016483		1544	-0.00165594		1544	-0.00131236		1544	-0.000617215					1544	-0.00113717					1544	-0.00223534
1545	-0.000762265					1545	-0.00240201					1545	-0.00112819					1545	-0.00017145		1545	-0.00160757		1545	-0.00218237		1545	-0.00156349					1545	-0.00125556					1545	-0.00219421
1546	-0.00071137					1546	-0.00261891					1546	-0.0014949					1546	0.000442064		1546	-0.00160938		1546	-0.00236227		1546	-0.0029099					1546	-0.000275667					1546	-0.002863
1547	-0.000470929					1547	-0.00250528					1547	-0.00124188					1547	-0.000394405		1547	-0.00126169		1547	-0.00296184		1547	-0.00330632					1547	-0.000630725					1547	-0.00391153
1548	-0.000510489					1548	-0.00274166					1548	-0.00138885					1548	-0.000940873		1548	-0.00020401		1548	-0.00447141		1548	-0.00342275					1548	-0.000815784					1548	-0.00431006
1549	-0.000860048					1549	-0.00221803					1549	-0.00157582					1549	-0.00123734		1549	0.000723673		1549	-0.00492097		1549	-0.00301917					1549	-0.000740843					1549	-0.0040786
1550	-0.00177961					1550	-0.0024944					1550	-0.0022528					1550	-0.00170381		1550	0.000331356		1550	-0.00380054		1550	-0.0024456					1550	-0.000725901					1550	-0.00348713
1551	-0.00320926					1551	-0.00243067					1551	-0.00240153					1551	-0.00182017		1551	-3.10985e-05		1551	-0.00324003		1551	-0.00225207					1551	-0.00182203					1551	-0.0033556
1552	-0.00265946					1552	-0.00105628					1552	-0.00304079					1552	-0.00108651		1552	-0.000414413		1552	-0.00215906		1552	-0.00330855					1552	-0.000714857					1552	-0.0018837
1553	-0.00245966					1553	-0.000171899					1553	-0.00288005					1553	-0.000302843		1553	-0.000887728		1553	-4.80925e-05		1553	-0.00419504					1553	-0.000747685					1553	-0.000411791
1554	-0.00262986					1554	0.000212486					1554	-0.00264931					1554	0.000770823		1554	-0.000561043		1554	-6.71236e-05		1554	-0.00522152					1554	-0.00138051					1554	0.000520114
1555	-0.00276006					1555	0.00133687					1555	-0.00294858					1555	0.00150449		1555	0.000665643		1555	-6.15467e-06		1555	-0.00597801					1555	-0.00180334					1555	0.00120202
1556	-0.00189027					1556	0.00160127					1556	-0.00276919					1556	0.000228251		1556	0.000752303		1556	-0.000245174		1556	-0.00443447					1556	-0.00199633					1556	0.00348394
1557	-0.00272115					1557	0.00108646					1557	-0.00211052					1557	-0.000767937		1557	0.00123768		1557	-0.000873586		1557	-0.00363092					1557	-0.00163756					1557	0.0040065
1558	-0.00358202					1558	0.000461646					1558	-0.00106186					1558	-0.000854125		1558	0.00103305		1558	-0.003122		1558	-0.00338737					1558	-0.0017188					1558	0.00236906
1559	-0.0019429					1559	-0.000103165					1559	0.000146807					1559	-0.00159031		1559	0.000898431		1559	-0.00328041		1559	-0.00288382					1559	-0.00107004					1559	0.000741622
1560	-0.00103377					1560	-8.79775e-05					1560	0.000765471					1560	-0.0019765		1560	-0.000396193		1560	-0.00350882		1560	-0.00262027					1560	-0.000671275					1560	-0.000105816
1561	-0.00154464					1561	0.000367211					1561	-9.66421e-05					1561	-0.000732596		1561	-0.00135082		1561	-0.00296723		1561	-0.00388665					1561	-0.000172512					1561	-0.00172325
1562	-0.00140614					1562	0.000423163					1562	-0.00115944					1562	-0.000648612		1562	-0.0018669		1562	-0.00254501		1562	-0.00432297					1562	-0.00118133					1562	-0.00403996
1563	-0.000667699					1563	0.000969201					1563	-0.00145223					1563	-0.00140463		1563	-0.00123315		1563	-0.000782721		1563	-0.0028893					1563	-0.001141					1563	-0.00417658
1564	-0.00190926					1564	0.00129524					1564	-0.00156502					1564	-0.00135064		1564	-0.000889392		1564	0.00055957		1564	-0.00130562					1564	-0.00127066					1564	-0.0040032
1565	-0.00172082					1565	0.000411276					1565	-0.00113781					1565	-0.00146666		1565	-0.000395637		1565	0.00123186		1565	-7.19436e-05					1565	-0.00177033					1565	-0.00287982
1566	-0.00135239					1566	0.000447314					1566	-0.000390887					1566	-0.00122257		1566	0.00127812		1566	0.00112415		1566	0.000781825					1566	-0.00222					1566	-0.00168644
1567	-0.00152439					1567	0.000164045					1567	-0.00013435					1567	-1.83425e-05		1567	0.00114036		1567	0.00065706		1567	0.00176572					1567	-0.00157585					1567	-0.000192242
1568	-0.00117652					1568	0.00028097					1568	-0.000487814					1568	0.00166589		1568	-0.000127816		1568	-0.000209861		1568	0.000659619					1568	-0.00186343					1568	0.000102188
1569	-0.000698653					1569	0.000767895					1569	-0.00124128					1569	0.00277011		1569	-0.00100599		1569	-0.00108678		1569	-0.000636483					1569	-0.000971014					1569	0.000556617
1570	-0.000300784					1570	0.00148482					1570	-0.00108474					1570	0.00331434		1570	-0.000684173		1570	-0.0014837		1570	-0.00141259					1570	-8.85973e-05					1570	-6.89533e-05
1571	0.000487085					1571	0.000481746					1571	-0.000458122					1571	0.00309867		1571	-0.00141235		1571	-0.00151062		1571	-0.000428595					1571	0.000543819					1571	8.54763e-05
1572	0.00242477					1572	0.000239246					1572	0.00026869					1572	0.00181322		1572	-0.000602017		1572	-0.00155696		1572	-0.00131438					1572	0.00025171					1572	0.00140082
1573	0.00168237					1573	-0.000312961					1573	0.000725501					1573	0.000677765		1573	0.00051756		1573	-0.00140301		1573	-0.00110017					1573	5.72964e-05					1573	0.00173662
1574	0.00164997					1574	-0.000625167					1574	0.00168231					1574	0.000162314		1574	0.000627137		1574	-0.00150906		1574	-0.00123596					1574	-0.000707118					1574	0.00127243
1575	0.000947568					1575	-0.00117737					1575	0.00174912					1575	-0.000863137		1575	0.000176713		1575	-0.0013451		1575	-0.00176175					1575	-0.000531532					1575	0.00113823
1576	0.000535166					1576	-0.00125958					1576	0.00100616					1576	-0.00117853		1576	3.62903e-05		1576	-0.000901149		1576	-0.00256747					1576	-0.000875946					1576	0.000864037
1577	-7.72635e-05					1577	-0.00188133					1577	0.00112421					1577	-7.36404e-05		1577	-0.00100552		1577	0.000283347		1577	-0.00151285					1577	-0.000733366					1577	-1.92521e-05
1578	0.000340284					1578	-0.00207271					1578	0.00128226					1578	-0.000268755		1578	-0.0019285		1578	0.000238298		1578	-0.00156824					1578	-0.000293311					1578	0.000198219
1579	9.78307e-05					1579	-0.00112408					1579	-0.000189695					1579	-0.000973869		1579	-0.000991478		1579	0.00100325		1579	-0.00134362					1579	-0.000433255					1579	0.000365691
1580	0.000155378					1580	-0.000405458					1580	-0.000721647					1580	-0.000608983		1580	-0.000494456		1580	0.0012882		1580	-0.000379005					1580	-0.0010532					1580	-0.000666838
1581	-0.000357075					1581	-0.000436832					1581	0.000156537					1581	-4.40743e-05		1581	-0.000977433		1581	0.000533149		1581	0.000205645					1581	-0.000123143					1581	-0.00245937
1582	-0.0012495					1582	0.0010922					1582	0.000356622					1582	-0.000448836		1582	-0.000581596		1582	8.8582e-05		1582	7.60063e-07					1582	0.0004952					1582	-0.00312107
1583	-0.000801874					1583	0.00132178					1583	0.000966708					1583	0.000716401		1583	0.000122639		1583	0.000784668		1583	-0.000484125					1583	0.00103122					1583	-0.00405166
1584	-0.000724251					1584	0.000641354					1584	0.00186679					1584	0.000661639		1584	-0.000263126		1584	0.000140753		1584	8.09905e-05					1584	0.000937247					1584	-0.00382225
1585	-0.000226629					1585	0.000370932					1585	0.00252688					1585	-0.000333123		1585	-0.000668891		1585	-0.000113161		1585	-0.000373894					1585	0.000353271					1585	-0.00212284
1586	0.000690994					1586	0.00121051					1586	0.00145697					1586	-0.00115788		1586	-0.000524656		1586	-2.70756e-05		1586	-0.000928779					1586	6.92948e-05					1586	0.000546566
1587	0.00109869					1587	0.000320416					1587	0.00120962					1587	-0.00136228		1587	-0.000101291		1587	0.000309393		1587	-0.000873102					1587	-0.000365461					1587	0.00242668
1588	0.00108655					1588	0.000951067					1588	0.000452406					1588	-0.00292667		1588	-6.98952e-05		1588	0.000176729		1588	0.00114261					1588	-0.000601984					1588	0.00434839
1589	0.00133441					1589	0.000941718					1589	0.000265194					1589	-0.00222105		1589	0.0004615		1589	0.000464066		1589	0.00128831					1589	-0.000498506					1589	0.00533011
1590	0.00129227					1590	0.00163237					1590	-0.000342019					1590	-0.000705427		1590	3.28961e-05		1590	0.000541402		1590	0.00068402					1590	0.000594972					1590	0.00561182
1591	0.000740133					1591	0.00168302					1591	3.07691e-05					1591	-0.000529808		1591	-0.000215708		1591	0.00148874		1591	0.000429727					1591	0.000498449					1591	0.00402354
1592	0.000168056					1592	0.00311386					1592	-0.000293801					1592	-0.000343815		1592	-0.000644837		1592	0.00192633		1592	0.000455995					1592	0.000361716					1592	0.00115574
1593	-0.000233754					1593	0.00351554					1593	-0.000827844					1593	1.22517e-05		1593	-0.000946235		1593	0.00210501		1593	-0.000157625					1593	0.000714073					1593	-0.00059994
1594	0.000654437					1594	0.00264722					1594	-0.000761886					1594	0.000388319		1594	-0.000957633		1594	0.00165369		1594	-7.12447e-05					1594	0.00084643					1594	-0.00139562
1595	0.000382627					1595	0.0020089					1595	0.000624072					1595	0.000374386		1595	4.09682e-05		1595	0.00157237		1595	5.51355e-05					1595	0.000648786					1595	-0.0028013
1596	-0.000379183					1596	0.000850583					1596	0.00120003					1596	0.000610453		1596	0.00096957		1596	0.000391046		1596	4.15158e-05					1596	0.000931143					1596	-0.00180698
1597	-0.00054097					1597	-0.000517691					1597	0.00256857					1597	0.00108691		1597	0.00166799		1597	-0.00042018		1597	-0.000611583					1597	0.000373509					1597	0.000487536
1598	-0.000332447					1598	-0.000585339					1598	0.00331813					1598	0.00191352		1598	0.00129391		1598	-0.000480127		1598	-0.00163447					1598	-0.000583994					1598	0.00197466
1599	-0.000133923					1599	-0.000422988					1599	0.00301769					1599	0.00215013		1599	0.000939835		1599	0.000439927		1599	-0.00127737					1599	-0.000531497					1599	0.00276179
1600	0.0005646					1600	-0.00152064					1600	0.00168725					1600	0.00247674		1600	0.000115759		1600	0.00082998		1600	-0.000170259					1600	0.000201					1600	0.00334892
1601	0.00111312					1601	-0.00125828					1601	0.00132681					1601	0.00259335		1601	-0.000288317		1601	0.00125003		1601	0.000656849					1601	-0.000326503					1601	0.00293605
1602	0.00136165					1602	-0.000635933					1602	-0.000171354					1602	0.00175031		1602	-0.00149239		1602	0.000930087		1602	0.00211445					1602	-0.000654006					1602	0.00344318
1603	0.000300474					1603	-0.000733364					1603	-0.000138001					1603	0.00151752		1603	-0.00163903		1603	0.000561437		1603	0.00261239					1603	0.000219723					1603	0.00386312
1604	-0.00116068					1604	0.000319216					1604	0.000595352					1604	0.000244723		1604	-0.00243581		1604	0.000122855		1604	0.00191032					1604	0.000583516					1604	0.0043432
1605	-0.00182184					1605	0.000981796					1605	0.000988705					1605	-0.000728073		1605	-0.00206258		1605	-7.57264e-05		1605	0.00128825					1605	0.00060731					1605	0.00539329
1606	-0.00139299					1606	0.00130438					1606	0.000182058					1606	-0.00126087		1606	-0.00180935		1606	0.000415692		1606	0.000676188					1606	0.0013711					1606	0.00580338
1607	-0.00114415					1607	0.000266956					1607	0.000727222					1607	-0.000803381		1607	-0.00111613		1607	0.00039711		1607	-0.000605487					1607	0.0031849					1607	0.00493347
1608	-0.000275042					1608	-0.000400591					1608	0.000614322					1608	-0.00055559		1608	-0.000124891		1608	-0.000190368		1608	-0.000666745					1608	0.00305062					1608	0.00486596
1609	-0.000205881					1609	-0.00156817					1609	-0.000108578					1609	2.20082e-06		1609	0.00069594		1609	-0.000597621		1609	-0.000568004					1609	0.00227674					1609	0.00368894
1610	0.000373281					1610	-0.00221574					1610	-0.000421478					1610	-1.00082e-05		1610	0.000896771		1610	-0.00143487		1610	-0.000659262					1610	0.00225286					1610	0.00220192
1611	0.000492442					1611	-0.00274331					1611	0.000665622					1611	-0.000112217		1611	0.0013476		1611	-0.00191213		1611	-0.00021052					1611	0.000808984					1611	0.0019349
1612	0.000651603					1612	-0.00250089					1612	0.000994045					1612	-0.000484212		1612	0.00215843		1612	-0.00195938		1612	-0.000191517					1612	-0.000124896					1612	0.00142788
1613	0.000701041					1613	-0.00159878					1613	0.000974755					1613	-0.000105837		1613	0.00180793		1613	-0.000865705		1613	-0.000592063					1613	-0.00059688					1613	0.000512698
1614	0.00179059					1614	-0.000586809					1614	0.00172546					1614	-7.74613e-05		1614	0.00163689		1614	0.000648346		1614	-0.000282609					1614	1.90257e-06					1614	-0.000351748
1615	0.00085014					1615	0.000325164					1615	0.00187617					1615	0.00115091		1615	0.00105586		1615	0.0026824		1615	-2.31556e-05					1615	-0.000419315					1615	-0.000836194
1616	0.000139689					1616	0.000277138					1616	0.00142688					1616	0.00111929		1616	-7.51802e-05		1616	0.00369645		1616	-0.000183702					1616	0.000549467					1616	0.00031936
1617	-0.000420762					1617	0.000339111					1617	0.000958422					1617	0.00097781		1617	-0.00150622		1617	0.0036005		1617	-0.000444079					1617	0.000988249					1617	0.00186491
1618	-0.000520982					1618	-0.00105924					1618	0.000562449					1618	0.000606769		1618	-0.00200827		1618	0.00287531		1618	-0.000153948					1618	0.00154861					1618	0.00245175
1619	-0.00217104					1619	-0.00231782					1619	-0.000653524					1619	0.00124573		1619	-0.00123102		1619	0.00150064		1619	-0.000323817					1619	0.00154005					1619	0.00337946
1620	-0.00293111					1620	-0.00281639					1620	-0.0010895					1620	0.000444686		1620	-0.000753775		1620	0.000795975		1620	-0.000943686					1620	0.000641491					1620	0.00493718
1621	-0.00275117					1621	-0.00296497					1621	-0.00130547					1621	0.000433644		1621	3.47395e-06		1621	-0.000378693		1621	-0.00203355					1621	-0.000567068					1621	0.00212489
1622	-0.00210123					1622	-0.00201354					1622	-0.00129106					1622	0.000432678		1622	0.000550723		1622	-0.000443361		1622	-0.00121333					1622	-0.000865627					1622	3.26012e-05
1623	-0.00564113					1623	-0.0055924					1623	-0.00515418					1623	-0.0021478		1623	1.72444e-05		1623	-0.00149747		1623	-0.0103125					1623	-0.004013					1623	-0.00382888
1624	-0.0287308					1624	-0.0287516					1624	-0.0228373					1624	-0.0104383		1624	-0.00919704		1624	-0.00998096		1624	-0.0509617					1624	-0.0230791					1624	-0.0195695
1625	-0.0743705					1625	-0.0746907					1625	-0.0537104					1625	-0.0210488		1625	-0.0218313		1625	-0.0231845		1625	-0.116421					1625	-0.0592251					1625	-0.04804
1626	-0.13822					1626	-0.13829					1626	-0.0938335					1626	-0.0325892		1626	-0.0364456		1626	-0.0372479		1626	-0.20032					1626	-0.108561					1626	-0.0836206
1627	-0.21082					1627	-0.211449					1627	-0.135967					1627	-0.0435997		1627	-0.0494099		1627	-0.0482414		1627	-0.286349					1627	-0.165937					1627	-0.122861
1628	-0.26711					1628	-0.266938					1628	-0.162557					1628	-0.0472696		1628	-0.0541046		1628	-0.0520246		1628	-0.336838					1628	-0.210922					1628	-0.151651
1629	-0.284909					1629	-0.285398					1629	-0.163438					1629	-0.0386596		1629	-0.0460402		1629	-0.043557		1629	-0.326176					1629	-0.225116					1629	-0.156391
1630	-0.265318					1630	-0.265818					1630	-0.142499					1630	-0.0212895		1630	-0.0287558		1630	-0.0267094		1630	-0.263385					1630	-0.20898					1630	-0.13912
1631	-0.216498					1631	-0.215778					1631	-0.10471					1631	0.00253053		1631	-0.00533137		1631	-0.00391186		1631	-0.162823					1631	-0.168714					1631	-0.105559
1632	-0.153197					1632	-0.150108					1632	-0.0625204					1632	0.0274406		1632	0.0188431		1632	0.0169757		1632	-0.0580218					1632	-0.114388					1632	-0.0641587
1633	-0.0991063					1633	-0.0954277					1633	-0.0317894					1633	0.0436711		1633	0.0348772		1633	0.0296935		1633	0.00995028					1633	-0.0676708					1633	-0.0284378
1634	-0.0642354					1634	-0.0596582					1634	-0.0149083					1634	0.0472317		1634	0.0414706		1634	0.034622		1634	0.0321225					1634	-0.0380825					1634	-0.00562639
1635	-0.0463344					1635	-0.0433487					1635	-0.00986715					1635	0.0412623		1635	0.0397439		1635	0.0321905		1635	0.0165546					1635	-0.0236142					1635	0.00487505
1636	-0.0423535					1636	-0.0414092					1636	-0.013656					1636	0.0289728		1636	0.0317673		1636	0.023909		1636	-0.0207432					1636	-0.0208658					1636	0.0105165
1637	-0.0453025					1637	-0.0473497					1637	-0.0212549					1637	0.0150034		1637	0.0209207		1637	0.0151875		1637	-0.057401					1637	-0.0268175					1637	0.0133279
1638	-0.0503316					1638	-0.0542503					1638	-0.0283927					1638	0.00539435		1638	0.0112039		1638	0.00839608		1638	-0.0775283					1638	-0.0334189					1638	0.0137294
1639	-0.0526403					1639	-0.0576916					1639	-0.0320501					1639	0.00151541		1639	0.00664644		1639	0.00623539		1639	-0.0762554					1639	-0.0355187					1639	0.0146512
1640	-0.0512791					1640	-0.0556228					1640	-0.0312176					1640	0.00302647		1640	0.00604897		1640	0.00658471		1640	-0.0601825					1640	-0.0334885					1640	0.016873
1641	-0.0463979					1641	-0.049574					1641	-0.0281751					1641	0.00702753		1641	0.00750149		1641	0.00882402		1641	-0.0395197					1641	-0.0286283					1641	0.0158447
1642	-0.0391767					1642	-0.0426052					1642	-0.0233226					1642	0.0113586		1642	0.010204		1642	0.0110533		1642	-0.0221868					1642	-0.0217381					1642	0.0112065
1643	-0.0326154					1643	-0.0359165					1643	-0.0192394					1643	0.01359		1643	0.0129665		1643	0.0131426		1643	-0.0106734					1643	-0.0162379					1643	0.00687824
1644	-0.0273339					1644	-0.0293285					1644	-0.016326					1644	0.0158415		1644	0.0151085		1644	0.0130727		1644	-0.00543988					1644	-0.011656					1644	0.00284987
1645	-0.0230425					1645	-0.0241105					1645	-0.0135626					1645	0.015433		1645	0.0151904		1645	0.0129327		1645	-0.0042463					1645	-0.0101241					1645	-0.000188513
1646	-0.020361					1646	-0.0202925					1646	-0.0115991					1646	0.0132445		1646	0.0138623		1646	0.0120327		1646	-0.00592273					1646	-0.00982219					1646	-0.00178689
1647	-0.0191595					1647	-0.0175945					1647	-0.0111057					1647	0.00993604		1647	0.0121143		1647	0.0104327		1647	-0.00849916					1647	-0.0096203					1647	-0.00195527
1648	-0.017198					1648	-0.0160165					1648	-0.00928201					1648	0.0080078		1648	0.00998621		1648	0.00883268		1648	-0.0105952					1648	-0.0085284					1648	-0.000353648
1649	-0.0164563					1649	-0.0159692					1649	-0.00773816					1649	0.00559976		1649	0.00785782		1649	0.00725319		1649	-0.0109609					1649	-0.0085252					1649	0.00256744
1650	-0.0142146					1650	-0.0147621					1650	-0.0073943					1650	0.00436172		1650	0.00644939		1650	0.00534377		1650	-0.0102566					1650	-0.00694183					1650	0.00554846
1651	-0.0111529					1651	-0.0139449					1651	-0.00684045					1651	0.00225368		1651	0.00649096		1651	0.00433435		1651	-0.00830236					1651	-0.00630846					1651	0.00609947
1652	-0.00782113					1652	-0.0121477					1652	-0.00466659					1652	0.00149564		1652	0.00596253		1652	0.00320493		1652	-0.00664809					1652	-0.00549508					1652	0.00729049
1653	-0.00603941					1653	-0.00944053					1653	-0.00318276					1653	0.00155777		1653	0.0041041		1653	0.00214551		1653	-0.0047835					1653	-0.00510171					1653	0.00698151
1654	-0.00291752					1654	-0.00776401					1654	-0.00183897					1654	0.00188014		1654	0.00235557		1654	0.00209644		1654	-0.00452851					1654	-0.00524736					1654	0.00553171
1655	-0.00194558					1655	-0.0076277					1655	-0.000785179					1655	0.00150252		1655	0.00154701		1655	0.00285747		1655	-0.00420352					1655	-0.00496272					1655	0.00312166
1656	-0.00131365					1656	-0.00737138					1656	-0.000281388					1656	0.00259489		1656	0.000458456		1656	0.00200851		1656	-0.00419853					1656	-0.00480807					1656	0.00259161
1657	-0.00162171					1657	-0.00763507					1657	-0.000597597					1657	0.00266726		1657	6.98981e-05		1657	0.00258954		1657	-0.00371355					1657	-0.00536342					1657	0.00118156
1658	-0.000669773					1658	-0.00802875					1658	-0.00141398					1658	0.00125975		1658	0.00083134		1658	0.00255057		1658	-0.00347833					1658	-0.00583877					1658	-0.000698489
1659	-2.77152e-05					1659	-0.00710302					1659	-0.00115074					1659	-0.000277491		1659	0.00185285		1659	0.000991818		1659	-0.00178262					1659	-0.00516344					1659	-0.00178952
1660	0.000894409					1660	-0.00570762					1660	-0.000867504					1660	-0.00142473		1660	0.0026644		1660	-0.000266818		1660	-0.000106919					1660	-0.00458772					1660	-0.0014811
1661	0.00104653					1661	-0.00501221					1661	-0.00110427					1661	-0.00145197		1661	0.00279594		1661	-0.000415453		1661	0.00162879					1661	-0.003922					1661	-0.00141268
1662	0.00146866					1662	-0.0037768					1662	-0.000951027					1662	-0.00114922		1662	0.00215749		1662	-0.00107409		1662	0.00234449					1662	-0.00264629					1662	-0.00117426
1663	0.000280784					1663	-0.00360139					1663	-0.000507997					1663	-9.63857e-05		1663	0.00194904		1663	-0.000522723		1663	0.00226034					1663	-0.00172057					1663	-0.00080584
1664	-0.00120701					1664	-0.00369648					1664	-0.0017758					1664	0.000986734		1664	-0.000479235		1664	0.00209875		1664	0.00106677					1664	-0.0009444					1664	-0.000898465
1665	-0.00206472					1665	-0.00277203					1665	-0.0018936					1665	0.00200985		1665	-0.00304735		1665	0.00529033		1665	-0.000716804					1665	-0.000127818					1665	-0.00105204
1666	-0.00254243					1666	-0.00219757					1666	-0.0012114					1666	0.00269297		1666	-0.00254546		1666	0.0081219		1666	-0.00178038					1666	0.000898763					1666	-0.00145561
1667	-0.00270014					1667	-0.00248311					1667	-0.000759199					1667	0.00328609		1667	-0.00144358		1667	0.00902348		1667	-0.00183395					1667	0.00120535					1667	-0.00376918
1668	-0.00229785					1668	-0.00124865					1668	-0.00147713					1668	0.00194924		1668	-0.00146169		1668	0.00959506		1668	-0.00239746					1668	0.000391927					1668	-0.00464275
1669	-0.00106551					1669	-0.000504601					1669	-0.000816453					1669	0.0009527		1669	-0.000159569		1669	0.00915667		1669	-0.0019003					1669	-0.00150122					1669	-0.00518731
1670	-0.00096308					1670	-0.00119114					1670	-0.00142578					1670	0.000546157		1670	-0.000627109		1670	0.00698834		1670	-0.00211315					1670	-0.00345398					1670	-0.00549334
1671	-0.00151065					1671	-0.00167768					1671	-0.00117511					1671	-0.00111039		1671	-0.00174465		1671	0.00522		1671	-0.00331599					1671	-0.00363674					1671	-0.00480936
1672	-0.00182822					1672	-0.00157421					1672	-0.00116443					1672	-0.00111693		1672	-0.00228219		1672	0.00450167		1672	-0.00327884					1672	-0.0035095					1672	-0.00194539
1673	-0.0024458					1673	-0.00193075					1673	-0.00156376					1673	0.000276528		1673	-0.00235973		1673	0.00360334		1673	-0.00242168					1673	-0.00235225					1673	0.00023859
1674	-0.00408334					1674	-0.00187759					1674	-0.00168503					1674	0.00124029		1674	-0.00117704		1674	0.002575		1674	-0.00243382					1674	-0.00184488					1674	0.00171173
1675	-0.00371079					1675	-0.00152516					1675	-0.00149637					1675	0.00123406		1675	0.00059623		1675	0.00250663		1675	-0.00181593					1675	-0.000907181					1675	0.00318278
1676	-0.00262825					1676	-0.000452736					1676	-0.00261771					1676	0.00186782		1676	0.000389497		1676	0.00298827		1676	-0.00152804					1676	-0.00238948					1676	0.00334384
1677	-0.00270571					1677	0.000239689					1677	-0.00382905					1677	0.00114159		1677	-0.000317236		1677	0.00279991		1677	-0.00219015					1677	-0.00331178					1677	0.00322489
1678	-0.00216317					1678	0.000382113					1678	-0.00303039					1678	0.000445361		1678	-0.000393969		1678	0.00269154		1678	-0.00270226					1678	-0.00272408					1678	0.00167595
1679	-0.00225061					1679	4.35536e-06					1679	-0.00188385					1679	0.00112937		1679	-0.000930526		1679	0.00264316		1679	-0.00327375					1679	-0.000416343					1679	-0.000273575
1680	-0.00240798					1680	-0.0015543					1680	-0.00171769					1680	0.00109343		1680	-0.000716218		1680	0.00388464		1680	-0.00332512					1680	0.000121608					1680	-0.00300596
1681	-0.00359534					1681	-0.00284296					1681	-0.00117153					1681	0.00128748		1681	8.08977e-06		1681	0.00520613		1681	-0.00307649					1681	0.000659559					1681	-0.00429835
1682	-0.00324271					1682	-0.00323162					1682	-0.00107537					1682	0.00124154		1682	0.000912398		1682	0.00695761		1682	-0.00315786					1682	0.00119751					1682	-0.00592074
1683	-0.00312008					1683	-0.00316028					1683	-0.000959205					1683	0.0011156		1683	0.000756705		1683	0.0090691		1683	-0.00252923					1683	0.000425461					1683	-0.00677313
1684	-0.00191744					1684	-0.00286899					1684	-0.00174519					1684	0.000369843		1684	0.000621077		1684	0.00998057		1684	-0.00130006					1684	-0.000836586					1684	-0.00681572
1685	-0.00152474					1685	-0.00124877					1685	-0.00167196					1685	0.00040416		1685	0.00121666		1685	0.00850179		1685	-0.00108069					1685	-0.00119859					1685	-0.00515202
1686	-0.000482044					1686	0.000251441					1686	-0.00162874					1686	-0.000411523		1686	0.00112224		1686	0.00689301		1686	-0.000571314					1686	-0.00152059					1686	-0.00367832
1687	-0.000579345					1687	0.000821657					1687	-0.00132551					1687	-0.000557206		1687	0.00108782		1687	0.00575422		1687	-0.000511941					1687	-0.00277259					1687	-0.00124463
1688	-0.000486646					1688	0.000681873					1688	-0.00191228					1688	-0.000822889		1688	0.00222341		1688	0.00387544		1688	-0.00121257					1688	-0.00349459					1688	0.000409071
1689	-0.000103947					1689	0.00110209					1689	-0.00156098					1689	-0.00103843		1689	0.00222899		1689	0.00260665		1689	-0.00212273					1689	-0.00338659					1689	0.00248277
1690	0.000218791					1690	0.000511214					1690	-0.00181089					1690	-0.00082387		1690	0.00163598		1690	0.0021375		1690	-0.00299261					1690	-0.00272874					1690	0.00254261
1691	0.000281531					1691	-0.00077974					1691	-0.00192079					1691	-0.000729315		1691	0.000853068		1691	0.00160833		1691	-0.00329248					1691	-0.0020109					1691	0.00207216
1692	0.000184272					1692	-0.00105069					1692	-0.0016607					1692	-0.00064476		1692	0.000960159		1692	0.00130915		1692	-0.00338236					1692	-0.000993056					1692	0.000351719
1693	-0.000132987					1693	-0.00117165					1693	-0.000720604					1693	-0.000220205		1693	0.00034725		1693	0.000989974		1693	-0.00298224					1693	-0.000945214					1693	-0.000748726
1694	8.97532e-05					1694	-0.0010826					1694	-0.000912022					1694	-7.5535e-05		1694	-0.000435659		1694	0.0013308		1694	-0.00278169					1694	-0.000727372					1694	-0.00320917
1695	0.000222508					1695	-0.000734545					1695	-0.00060495					1695	-0.00018075		1695	-0.00109715		1695	0.0016512		1695	-0.00222073					1695	-0.00137982					1695	-0.00368314
1696	0.000285266					1696	-0.000816713					1696	-0.000157879					1696	0.000784035		1696	-8.83198e-05		1696	0.00101152		1696	-0.00169976					1696	-0.000592342					1696	-0.00340793
1697	0.000378023					1697	-4.8881e-05					1697	-0.000490808					1697	0.00093882		1697	0.000100513		1697	0.000551827		1697	-0.000308796					1697	0.000275139					1697	-0.00299272
1698	0.000910781					1698	0.000218951					1698	-0.00120374					1698	0.000783604		1698	0.00108935		1698	0.000922139		1698	0.000452169					1698	0.00148262					1698	-0.00275751
1699	5.35391e-05					1699	-0.000403217					1699	-0.0017977					1699	4.84764e-05		1699	0.00177818		1699	0.00096245		1699	0.0004936					1699	0.000550101					1699	-0.0012223
1700	-0.000963708					1700	0.000263752					1700	-0.00152331					1700	-0.000216511		1700	0.00255838		1700	0.000352316		1700	0.000945779					1700	-8.28088e-05					1700	-0.00159017
1701	-0.000850957					1701	0.00147034					1701	-0.000868931					1701	-0.000161499		1701	0.00192919		1701	0.00102198		1701	0.000977958					1701	-0.000195892					1701	-0.00272941
1702	0.000121793					1702	0.000926928					1702	-7.45488e-05					1702	0.000603513		1702	0.00154		1702	0.000691654		1702	0.000400138					1702	-0.000208975					1702	-0.00278865
1703	0.00104454					1703	0.000193517					1703	0.000269834					1703	0.00150853		1703	0.000800811		1703	8.13229e-05		1703	0.000752317					1703	0.000417942					1703	-0.00216789
1704	0.00220729					1704	-5.98953e-05					1704	0.00108363					1704	0.00197359		1704	0.00118162		1704	-0.000769008		1704	0.00175492					1704	0.00141486					1704	-0.00225713
1705	0.00287003					1705	-0.000834055					1705	0.000155824					1705	0.00170881		1705	0.000773665		1705	-9.97981e-05		1705	0.0024187					1705	0.00191131					1705	-0.0015589
1706	0.00206275					1706	-0.00141877					1706	-0.00146198					1706	0.00137403		1706	0.00147662		1706	-0.00103093		1706	0.00243248					1706	0.000527418					1706	0.000137446
1707	0.00126547					1707	-0.00225348					1707	-0.00220979					1707	0.00049925		1707	0.00142958		1707	-0.00139206		1707	0.00245626					1707	-5.64743e-05					1707	0.000313796
1708	0.000248184					1708	-0.00251819					1708	-0.0019676					1708	-0.000775531		1708	0.00119254		1708	-0.00181319		1708	0.00182004					1708	-0.00153037					1708	-0.000389854
1709	-7.90965e-05					1709	-0.0019529					1709	-0.00233564					1709	-0.000410289		1709	0.000255503		1709	-0.00199432		1709	0.000744084					1709	-0.00244426					1709	-0.000883504
1710	0.000313596					1710	-0.00147819					1710	-0.00120502					1710	0.000805078		1710	2.93841e-05		1710	-0.00299587		1710	-4.04024e-05					1710	-0.00252868					1710	-0.00100911
1711	0.000616256					1711	-0.00169416					1711	-0.0003944					1711	-5.95553e-05		1711	-0.000315637		1711	-0.00207793		1711	0.000415112					1711	-0.000823721					1711	-0.00174704
1712	0.000818916					1712	-0.000950133					1712	-0.000213778					1712	-0.000524188		1712	-0.000110659		1712	-0.00113998		1712	-0.000119375					1712	-0.000208764					1712	-0.000814969
1713	0.000231575					1713	0.000213895					1713	0.000196843					1713	0.000761179		1713	-0.00044568		1713	-0.000362041		1713	-0.000553861					1713	0.00113619					1713	0.000197101
1714	-0.000815765					1714	0.000257924					1714	0.00119744					1714	0.000866548		1714	0.000169299		1714	0.000185902		1714	0.000421709					1714	0.00192115					1714	0.00214917
1715	-0.00154314					1715	-0.000348381					1715	0.000947308					1715	-0.00053801		1715	-0.000185142		1715	0.000263514		1715	0.00163889					1715	0.00270568					1715	0.00227985
1716	-0.000790586					1716	-0.000225341					1716	0.00146718					1716	-0.000562569		1716	-0.000318443		1716	0.000180479		1716	0.00117606					1716	0.000479387					1716	0.0014978
1717	-0.000838032					1717	-0.000122302					1717	0.00220704					1717	-0.00101713		1717	-0.000321743		1717	-8.25555e-05		1717	0.00163324					1717	-0.000976908					1717	0.00135575
1718	0.000294522					1718	-0.000639262					1718	0.00227691					1718	-0.00336169		1718	-0.000335044		1718	3.44096e-05		1718	0.000860421					1718	-0.0017032					1718	5.36999e-05
1719	0.000527076					1719	-0.000446223					1719	0.00257678					1719	-0.00440625		1719	-0.000848344		1719	-0.000268625		1719	-0.0004424					1719	-0.0019595					1719	-0.00144835
1720	0.000709606					1720	-0.000313324					1720	0.00286659					1720	-0.00338079		1720	-0.000541315		1720	0.00093812		1720	-0.00197385					1720	-0.0021361					1720	-0.00239127
1721	0.000162051					1721	-0.00100093					1721	0.00179639					1721	-0.00213532		1721	9.68921e-05		1721	-0.000205919		1721	-0.00152518					1721	-0.000103816					1721	-0.00194731
1722	3.44953e-05					1722	-0.000468528					1722	0.0014862					1722	-0.000429862		1722	0.000195099		1722	-0.000449958		1722	-0.000846505					1722	0.000408471					1722	-0.00248334
1723	-0.00148306					1723	-0.000126129					1723	0.000695999					1723	0.0013656		1723	0.000643307		1723	-0.000343997		1723	-0.000127832					1723	-0.000719242					1723	-0.00151938
1724	-0.00165062					1724	4.62687e-05					1724	-0.000174198					1724	0.00187106		1724	0.000701514		1724	0.000241964		1724	2.08418e-05					1724	-0.00134695					1724	-0.00171542
1725	-0.00216818					1725	0.000738643					1725	-0.000274182					1725	0.00108655		1725	0.00131985		1725	3.78216e-05		1725	0.000140588					1725	-0.00138479					1725	-0.000711835
1726	-0.0021758					1726	0.0011108					1726	0.00100589					1726	0.00104206		1726	0.000989396		1726	0.000272751		1726	-8.9397e-05					1726	-0.00120374					1726	-0.00105167
1727	-0.00191341					1727	0.000472966					1727	0.000365955					1727	0.000757556		1727	0.000498938		1727	-0.00033232		1727	-0.000949382					1727	-0.000222687					1727	-0.000911507
1728	-0.000441033					1728	0.000395128					1728	0.00114602					1728	0.000443057		1728	-0.00039152		1728	-0.00122739		1728	-0.000809367					1728	0.000588364					1728	-0.00130134
1729	0.000241349					1729	0.000617289					1729	0.00137609					1729	0.000248558		1729	0.000108022		1729	-0.00227246		1729	-0.000379353					1729	0.00171942					1729	-0.000641179
1730	0.00088373					1730	0.000209451					1730	0.000866444					1730	0.00138409		1730	-0.000952436		1730	-0.00321753		1730	0.000291528					1730	0.00116047					1730	-0.000221016
1731	0.00104626					1731	0.000911736					1731	0.000406928					1731	0.000709641		1731	-3.19281e-05		1731	-0.00213362		1731	0.000792809					1731	0.000690713					1731	-0.000684316
1732	0.0011388					1732	0.00124402					1732	0.000847413					1732	-0.000284809		1732	-0.000291402		1732	-0.00139973		1732	0.00159409					1732	0.000120942					1732	-0.00144768
1733	0.00139134					1733	0.00166631					1733	0.000787897					1733	-0.00031926		1733	0.000599125		1733	-9.58377e-05		1733	0.000965373					1733	0.000361172					1733	-0.00166105
1734	0.00103387					1734	0.0011686					1734	0.000278382					1734	3.629e-05		1734	0.000449651		1734	0.00107805		1734	0.00135665					1734	-9.85992e-05					1734	-0.00288442
1735	0.000786412					1735	0.00121089					1735	0.000779102					1735	-0.000618141		1735	0.000940178		1735	0.00236195		1735	0.000908595					1735	0.00047163					1735	-0.00486778
1736	-6.07504e-05					1736	0.000993479					1736	-0.000129996					1736	-0.00107256		1736	-0.00111876		1736	0.00262499		1736	0.000331038					1736	0.00123134					1736	-0.00548389
1737	-2.78648e-05					1737	0.000996121					1737	0.000330906					1737	-0.000726974		1737	-0.00161762		1737	0.0024679		1737	-0.000126518					1737	0.00119096					1737	-0.00655043
1738	-0.000274979					1738	0.000188763					1738	-0.000998192					1738	-0.000571391		1738	-0.00289647		1738	0.000960807		1738	0.000935925					1738	0.00069058					1738	-0.00684697
1739	3.79064e-05					1739	0.000111405					1739	-0.00127729					1739	-0.000195807		1739	-0.00242533		1739	-0.000226284		1739	0.000678369					1739	0.000670203					1739	-0.00637352
1740	-0.000549208					1740	3.40471e-05					1740	-0.00123624					1740	-0.00046021		1740	-0.00201419		1740	-0.000913376		1740	0.00127123					1740	0.000459825					1740	-0.00630006
1741	0.000164017					1741	0.000637011					1741	9.50084e-05					1741	0.000395403		1741	-0.00136274		1741	-0.00128119		1741	0.000194602					1741	-0.000481028					1741	-0.00521855
1742	-4.26407e-05					1742	0.000330086					1742	-0.000273748					1742	0.000711016		1742	-0.000151183		1742	-0.000579252		1742	-0.000562026					1742	-0.000782046					1742	-0.0036877
1743	-0.0018293					1743	-0.00156684					1743	-0.0025625					1743	-0.000673371		1743	-0.00139963		1743	-0.000257315		1743	-0.00637865					1743	-0.00197306					1743	-0.00478686
1744	-0.021676					1744	-0.0214438					1744	-0.0179313					1744	-0.00844776		1744	-0.0106081		1744	-0.00507538		1744	-0.0406553					1744	-0.0173341					1744	-0.016296
1745	-0.0619026					1745	-0.0627207					1745	-0.0460599					1745	-0.0182521		1745	-0.0238565		1745	-0.0150134		1745	-0.100062					1745	-0.0507051					1745	-0.0387852
1746	-0.118569					1746	-0.121197					1746	-0.0834884					1746	-0.0308565		1746	-0.0389747		1746	-0.0272921		1746	-0.176728					1746	-0.0968366					1746	-0.0704056
1747	-0.184655					1747	-0.186864					1747	-0.122287					1747	-0.0427308		1747	-0.0528228		1747	-0.0407212		1747	-0.260184					1747	-0.148888					1747	-0.107367
1748	-0.238551					1748	-0.23923					1748	-0.147955					1748	-0.0469952		1748	-0.0565409		1748	-0.0479402		1748	-0.31325					1748	-0.19147					1748	-0.133948
1749	-0.257617					1749	-0.257027					1749	-0.149344					1749	-0.0392895		1749	-0.0477889		1749	-0.0430093		1749	-0.307926					1749	-0.206642					1749	-0.141679
1750	-0.240093					1750	-0.237943					1750	-0.129742					1750	-0.0231639		1750	-0.029767		1750	-0.0286483		1750	-0.250681					1750	-0.191694					1750	-0.13001
1751	-0.195689					1751	-0.190499					1751	-0.0949706					1751	-0.000568184		1751	-0.00467485		1751	-0.00766788		1751	-0.154697					1751	-0.154146					1751	-0.100312
1752	-0.134604					1752	-0.129905					1752	-0.0549288					1752	0.0225275		1752	0.0198974		1752	0.0169021		1752	-0.0479327					1752	-0.103169					1752	-0.0571041
1753	-0.0823399					1753	-0.0783212					1753	-0.0251071					1753	0.0384232		1753	0.0361898		1753	0.035402		1753	0.0222918					1753	-0.0583915					1753	-0.0206865
1754	-0.0476154					1754	-0.0466571					1754	-0.0096754					1754	0.0440989		1754	0.0424721		1754	0.043482		1754	0.0465762					1754	-0.0293742					1754	0.00528113
1755	-0.0324008					1755	-0.033073					1755	-0.00485366					1755	0.0395846		1755	0.0397144		1755	0.0430919		1755	0.0307206					1755	-0.0152969					1755	0.0206488
1756	-0.0289259					1756	-0.0340288					1756	-0.00802179					1756	0.0295103		1756	0.0310268		1756	0.0342915		1756	-0.0094949					1756	-0.0140301					1756	0.0231361
1757	-0.0338106					1757	-0.0413541					1757	-0.0152299					1757	0.0182761		1757	0.0202394		1757	0.0229204		1757	-0.0523904					1757	-0.0209739					1757	0.0152031
1758	-0.0403652					1758	-0.0490495					1758	-0.0235681					1758	0.00921182		1758	0.0111121		1758	0.0127393		1758	-0.0779159					1758	-0.0293377					1758	0.00479016
1759	-0.0444199					1759	-0.0523249					1759	-0.0279862					1759	0.00505756		1759	0.00567473		1759	0.00650824		1759	-0.0813514					1759	-0.0335314					1759	-0.00384283
1760	-0.0435145					1760	-0.0510903					1760	-0.0287043					1760	0.0064733		1760	0.00507738		1760	0.00402716		1760	-0.0669268					1760	-0.0329052					1760	-0.00906582
1761	-0.040129					1761	-0.0454755					1761	-0.0276624					1761	0.0094191		1761	0.00610011		1761	0.00587581		1761	-0.0464525					1761	-0.0282193					1761	-0.0119388
1762	-0.0359328					1762	-0.0368603					1762	-0.0245704					1762	0.0133649		1762	0.00885309		1762	0.0075137		1762	-0.0270281					1762	-0.0215543					1762	-0.0120217
1763	-0.0308165					1763	-0.029845					1763	-0.0202585					1763	0.0160807		1763	0.0105861		1763	0.00840159		1763	-0.0141038					1763	-0.0152693					1763	-0.0106046
1764	-0.0265403					1764	-0.0239798					1764	-0.0162266					1764	0.0171965		1764	0.012929		1764	0.00925948		1764	-0.00717945					1764	-0.0105443					1764	-0.00922757
1765	-0.0225241					1765	-0.0195546					1765	-0.0146146					1765	0.0175123		1765	0.013352		1765	0.00959737		1765	-0.0058951					1765	-0.00882933					1765	-0.00894049
1766	-0.0197777					1766	-0.0168793					1766	-0.0126127					1766	0.0152181		1766	0.013145		1766	0.0085751		1766	-0.00717114					1766	-0.00837453					1766	-0.00798331
1767	-0.0161505					1767	-0.0160934					1767	-0.0113407					1767	0.011844		1767	0.0116683		1767	0.00744193		1767	-0.00901724					1767	-0.00728089					1767	-0.0076155
1768	-0.0138133					1768	-0.0153876					1768	-0.00996878					1768	0.00840987		1768	0.0107716		1768	0.00632877		1768	-0.0103033					1768	-0.00678724					1768	-0.00618769
1769	-0.0114761					1769	-0.0141417					1769	-0.00918683					1769	0.00587574		1769	0.00858488		1769	0.0044956		1769	-0.0100694					1769	-0.00653359					1769	0.00115012
1770	-0.00869893					1770	-0.0131558					1770	-0.00770488					1770	0.0030616		1770	0.00706816		1770	0.00271244		1770	-0.00932552					1770	-0.00590994					1770	0.0114179
1771	-0.0068717					1771	-0.0117299					1771	-0.00629297					1771	0.00287751		1771	0.00553145		1771	0.00254924		1771	-0.00715216					1771	-0.00557634					1771	0.0208958
1772	-0.00522341					1772	-0.0101834					1772	-0.00433108					1772	0.00230344		1772	0.00441502		1772	0.00184501		1772	-0.00505897					1772	-0.00635419					1772	0.029135
1773	-0.00358512					1773	-0.00828685					1773	-0.00183919					1773	0.00173938		1773	0.00342859		1773	0.00214077		1773	-0.00273578					1773	-0.00552204					1773	0.0324742
1774	-0.00221683					1774	-0.00789031					1774	0.000342707					1774	0.00108531		1774	0.00298216		1774	0.00217654		1774	-0.0011026					1774	-0.00500989					1774	0.0284234
1775	-0.00164854					1775	-0.00772376					1775	0.0020646					1775	0.00104124		1775	0.00167573		1775	0.0020223		1775	0.000330588					1775	-0.00427774					1775	0.0217426
1776	-0.00130026					1776	-0.00743722					1776	0.00255641					1776	0.000977224		1776	0.0013893		1776	0.000878067		1776	0.00122315					1776	-0.00318559					1776	0.0150518
1777	-0.00218088					1777	-0.00755001					1777	0.00192818					1777	0.000603234		1777	0.000703117		1777	0.000492841		1777	0.00203534					1777	-0.00191494					1777	0.00798295
1778	-0.000701401					1778	-0.00731274					1778	0.000959952					1778	0.000449243		1778	0.000206957		1778	-0.000742481		1778	0.00231753					1778	-0.00196443					1778	0.00379423
1779	0.000718079					1779	-0.00579547					1779	0.000121722					1779	0.000415253		1779	0.000380798		1779	-0.0018378		1779	0.00231973					1779	-0.00224392					1779	-0.000174482
1780	0.000707559					1780	-0.0048582					1780	0.000613491					1780	0.000271263		1780	0.00181464		1780	-0.00186312		1780	0.00243192					1780	-0.000643409					1780	-0.0027032
1781	0.000377039					1781	-0.00390093					1781	0.00101516					1781	0.000907316		1781	0.00187848		1781	-0.00132845		1781	0.00187346					1781	0.0004571					1781	-0.00432191
1782	0.000757549					1782	-0.00216306					1782	0.00109674					1782	0.00202341		1782	0.00206252		1782	-1.46422e-05		1782	0.00183439					1782	0.000716194					1782	-0.00408844
1783	-0.00195167					1783	-0.00102502					1783	0.00131832					1783	0.0017095		1783	0.00122661		1783	0.000428933		1783	0.00105532					1783	0.00118492					1783	-0.00375441
1784	-0.0032209					1784	-0.000886989					1784	0.000779901					1784	0.0013656		1784	-0.000189298		1784	0.000442508		1784	0.000546244					1784	0.00214364					1784	-0.00286038
1785	-0.00328012					1785	-0.000808955					1785	0.000231481					1785	0.00136169		1785	-0.00156521		1785	-0.000283916		1785	0.000277171					1785	0.00134237					1785	-0.00312635
1786	-0.00255934					1786	-0.00072092					1786	-0.000197042					1786	0.00059782		1786	-0.00130112		1786	-0.00123034		1786	0.00130748					1786	0.0011311					1786	-0.00266232
1787	-0.00174762					1787	-0.00131234					1787	-0.000925718					1787	0.000194005		1787	-0.00108687		1787	-0.00273752		1787	0.00118687					1787	0.00097852					1787	-0.00308599
1788	-0.000285438					1788	-0.0016035					1788	-0.00182439					1788	0.000780189		1788	-0.00178254		1788	-0.00260507		1788	0.00189625					1788	0.000125318					1788	-0.00297854
1789	0.000466742					1789	-0.00157466					1789	-0.00170307					1789	0.00179637		1789	-0.00199822		1789	-0.00159261		1789	0.00194564					1789	-0.000247884					1789	-0.000981098
1790	0.000598922					1790	-0.00102582					1790	-0.00293175					1790	0.00129256		1790	-0.0012839		1790	-0.000590156		1790	0.000855024					1790	2.89136e-05					1790	0.00223635
1791	-0.000148898					1791	-0.00145698					1791	-0.00234051					1791	0.00060877		1791	-0.00170957		1791	9.22997e-05		1791	-0.000496105					1791	-0.000434289					1791	0.00523379
1792	-0.000405879					1792	-0.00209766					1792	-0.00137951					1792	-0.000234948		1792	-0.00171513		1792	0.000904123		1792	-0.00135854					1792	-0.000338637					1792	0.00789351
1793	-0.000432191					1793	-0.00259797					1793	-0.000298509					1793	-0.000398666		1793	-0.000180593		1793	0.000395442		1793	-0.00266097					1793	-0.000623901					1793	0.00943504
1794	-0.000998504					1794	-0.00259828					1794	0.000142493					1794	-0.00119238		1794	-0.000246056		1794	0.000436761		1794	-0.0033634					1794	-0.00105917					1794	0.00810657
1795	-0.00136482					1795	-0.00278859					1795	0.000833496					1795	-0.000886102		1795	-0.000251519		1795	0.00073808		1795	-0.00256583					1795	-0.00169443					1795	0.0039781
1796	-0.00146113					1796	-0.0015289					1796	0.000424433					1796	-0.0022098		1796	-0.000266982		1796	0.000749399		1796	-0.00221861					1796	-0.00165969					1796	-0.00110037
1797	-0.000676735					1797	-8.82541e-06					1797	0.000485047					1797	-0.00210342		1797	-0.00062236		1797	-0.000169787		1797	-0.00250313					1797	-0.00247582					1797	-0.00513676
1798	-0.000311435					1798	0.000621754					1798	-0.000134339					1798	-0.00143703		1798	-0.00243763		1798	-9.62121e-06		1798	-0.00250765					1798	-0.00249305					1798	-0.00863048
1799	-0.000106134					1799	0.00124233					1799	-0.00107372					1799	-0.000430643		1799	-0.0019629		1799	-0.00176946		1799	-0.00251217					1799	-0.00212028					1799	-0.00953419
1800	0.000469166					1800	0.000682913					1800	-0.00187311					1800	0.000325744		1800	-0.00232817		1800	-0.00284929		1800	-0.00275669					1800	-0.00178751					1800	-0.00823791
1801	0.000874467					1801	-0.000456507					1801	-0.00192252					1801	0.00135214		1801	-0.00286343		1801	-0.00266912		1801	-0.00348133					1801	-0.00138473					1801	-0.00729162
1802	0.000810315					1802	-0.000845631					1802	-0.00233236					1802	0.00207863		1802	-0.00281865		1802	-0.00223933		1802	-0.00373821					1802	-0.000272335					1802	-0.00603361
1803	0.00115733					1803	-0.00112412					1803	-0.0023622					1803	0.00117513		1803	-0.00142374		1803	-0.00152033		1803	-0.00358509					1803	0.000919274					1803	-0.0049319
1804	0.00118435					1804	-0.00221261					1804	-0.00144204					1804	0.000271629		1804	-0.000648834		1804	-0.000111338		1804	-0.00395197					1804	0.000760883					1804	-0.00329019
1805	0.00120137					1805	-0.0015111					1805	-0.00055188					1805	-0.000741873		1805	-5.39267e-05		1805	0.000127658		1805	-0.00362885					1805	0.000312491					1805	-0.00188848
1806	0.00157839					1806	-0.000399587					1806	-0.000111721					1806	-0.000725375		1806	0.00057098		1806	0.000666654		1806	-0.00225573					1806	0.0004141					1806	-0.000326771
1807	0.00142577					1807	-0.000187882					1807	-9.20466e-05					1807	-0.00100877		1807	0.000185918		1807	0.00154541		1807	-0.00125489					1807	-0.000174297					1807	0.000576158
1808	0.0013946					1808	3.46018e-05					1808	-0.000852407					1808	-0.00141215		1808	-0.000699018		1808	0.000813223		1808	-0.00111421					1808	-0.00112272					1808	0.00150396
1809	0.00181343					1809	0.000467086					1809	-0.00169277					1809	-0.000765535		1809	-0.00183395		1809	0.000961033		1809	0.000116467					1809	-0.000411138					1809	0.000621765
1810	0.00103226					1810	-0.000530431					1810	-0.00210313					1810	0.000121081		1810	-0.00224889		1810	0.000628843		1810	0.000197146					1810	0.000450441					1810	-0.00112043
1811	0.00134109					1811	-0.00124795					1811	-0.00227349					1811	0.000977697		1811	-0.00263383		1811	-0.000703347		1811	-0.000742175					1811	0.000442021					1811	-0.00169263
1812	0.00131006					1812	-0.00157538					1812	-0.00148433					1812	0.000254415		1812	-0.00237875		1812	-0.000975635		1812	-0.000613292					1812	0.000703689					1812	-0.00235427
1813	0.00117067					1813	-0.00139187					1813	-0.000285276					1813	0.000551156		1813	-0.000983551		1813	-9.90276e-05		1813	0.000155188					1813	0.000576356					1813	-0.0042097
1814	0.000281273					1814	-0.00131836					1814	0.000483777					1814	-0.000402104		1814	-0.00055835		1814	2.75795e-05		1814	-0.000146333					1814	0.000449022					1814	-0.00636513
1815	0.000781879					1815	0.000245156					1815	0.00155283					1815	-0.00202536		1815	-0.00161315		1815	0.000404187		1815	-0.000747854					1815	0.000301689					1815	-0.00392056
1816	0.00176249					1816	-0.000201333					1816	0.00145188					1816	-0.00300862		1816	-0.00122795		1816	0.000830794		1816	-0.000409374					1816	-0.000695644					1816	0.00364401
1817	0.00269309					1817	-0.000837821					1817	0.000310479					1817	-0.00213179		1817	-0.000352746		1817	0.000357401		1817	-0.0001422					1817	-0.000552977					1817	0.0120586
1818	0.00229518					1818	-0.000653179					1818	-0.000231121					1818	-0.000754916		1818	-0.000337424		1818	-0.000207166		1818	4.41532e-06					1818	-2.82692e-05					1818	0.0202304
1819	0.00281732					1819	0.000251506					1819	0.000247279					1819	-0.000178043		1819	-0.000122098		1819	0.000268221		1819	0.00046103					1819	-3.34819e-05					1819	0.0265624
1820	0.00255947					1820	0.000956192					1820	-7.43212e-05					1820	0.00111883		1820	0.00135323		1820	0.000553608		1820	0.000567645					1820	-0.000638694					1820	0.0257145
1821	0.00143161					1821	0.00217088					1821	-0.000195921					1821	0.0010257		1821	0.00101856		1821	0.000158995		1821	0.000504261					1821	0.000576093					1821	0.0185666
1822	0.000253753					1822	0.00320556					1822	-0.00042794					1822	0.000882655		1822	-0.000666119		1822	6.43823e-05		1822	0.000749993					1822	0.00051088					1822	0.0102286
1823	-0.000183248					1823	0.00263137					1823	-0.000560259					1823	-0.000180333		1823	-0.0012707		1823	5.87209e-05		1823	0.000825096					1823	0.000928333					1823	0.00334709
1824	-0.00116009					1824	0.00124738					1824	-0.000732578					1824	-0.000553322		1824	-0.00115527		1824	-0.00115713		1824	0.000180198					1824	0.000146279					1824	-0.00214325
1825	-0.00109693					1825	8.33848e-05					1825	-0.0011849					1825	-0.000556311		1825	-0.000989833		1825	-0.00162299		1825	0.0003153					1825	0.000604225					1825	-0.00400358
1826	-0.00166378					1826	-0.000800606					1826	-0.00101721					1826	-7.92995e-05		1826	-0.000584399		1826	-0.000318846		1826	-0.000519598					1826	0.000762172					1826	-0.00504392
1827	-0.00204062					1827	-0.0012446					1827	-0.000519886					1827	-0.00027222		1827	0.000391035		1827	0.000155299		1827	-0.00123506					1827	0.00175012					1827	-0.00707425
1828	-0.00131717					1828	-0.00115765					1828	-0.00030296					1828	-0.000715063		1828	0.000726605		1828	8.85327e-05		1828	-0.000621182					1828	0.00136098					1828	-0.0081394
1829	-0.0005636					1829	-0.000990349					1829	-0.000796034					1829	0.000452095		1829	0.00108223		1829	-6.85788e-05		1829	0.0001027					1829	0.00175295					1829	-0.00698257
1830	-0.000240034					1830	-0.000373048					1830	-0.000839108					1830	0.000389252		1830	-2.21542e-05		1830	0.00116431		1830	0.000226582					1830	0.00126492					1830	-0.00484574
1831	0.000233532					1831	-0.000115746					1831	-0.000892182					1831	0.00072641		1831	-0.000766534		1831	-7.28019e-05		1831	0.00160046					1831	0.000726884					1831	-0.00415891
1832	0.000357098					1832	-0.000528445					1832	-0.000945493					1832	0.00101362		1832	-0.000770913		1832	0.000150087		1832	0.00129402					1832	0.000138851					1832	-0.00118208
1833	0.000740628					1833	-0.000220357					1833	-2.9245e-05					1833	0.00234093		1833	-0.00105509		1833	-0.000157789		1833	0.000516976					1833	3.35117e-05					1833	0.00071896
1834	0.000934135					1834	-0.000411758					1834	0.000787003					1834	0.00216824		1834	-0.00151913		1834	0.000273838		1834	-0.000380071					1834	-0.000650079					1834	0.000722742
1835	0.000227642					1835	-0.00116316					1835	0.000623251					1835	0.00136555		1835	-0.000793166		1835	-0.000764534		1835	-0.000637117					1835	-0.000723671					1835	-0.00211348
1836	-0.000208851					1836	-0.00078456					1836	-5.01296e-07					1836	0.000822856		1836	0.000572794		1836	-0.000282907		1836	-0.00162416					1836	-0.00106726					1836	-0.00424969
1837	-0.000925344					1837	-0.000565962					1837	0.000545623					1837	0.000570193		1837	0.00113875		1837	-0.00161128		1837	-0.000931365					1837	-0.000620853					1837	-0.00661591
1838	-0.00242209					1838	-0.000936681					1838	1.3392e-06					1838	0.000147619		1838	0.000905021		1838	-0.00208027		1838	-0.00057908					1838	-3.21326e-05					1838	-0.00500875
1839	-0.0028891					1839	0.000393316					1839	-2.29442e-05					1839	-0.000534954		1839	0.00144161		1839	-0.0016799		1839	-3.67949e-05					1839	0.000759018					1839	-4.80366e-05
1840	-0.0017761					1840	0.000873313					1840	0.000502772					1840	-0.000137528		1840	0.0013182		1840	-0.00217953		1840	0.00061549					1840	0.00150017					1840	0.00534268
1841	-0.00111311					1841	0.00062331					1841	0.000218489					1841	0.000929899		1841	0.000784793		1841	-0.00312916		1841	0.00103778					1841	0.00175132					1841	0.00980339
1842	0.000249882					1842	0.00142331					1842	-0.000265843					1842	0.00102733		1842	0.000711384		1842	-0.00259879		1842	0.000940019					1842	0.00123247					1842	0.0123041
1843	0.00104257					1843	0.00226386					1843	-0.000570544					1843	0.000544807		1843	0.00133824		1843	-0.00112886		1843	0.000151942					1843	0.000935456					1843	0.0116874
1844	0.000424739					1844	0.00132538					1844	-0.00113524					1844	0.000412282		1844	0.00107554		1844	-0.00146967		1844	-7.61338e-05					1844	-3.84109e-05					1844	0.00740499
1845	-0.000423092					1845	0.000606901					1845	-0.00101994					1845	-0.000360242		1845	0.000832839		1845	-0.00119049		1845	-0.00059421					1845	-0.000342278					1845	0.00399262
1846	-0.00166092					1846	-0.00022158					1846	-0.000224645					1846	-0.000212767		1846	0.000590141		1846	-0.000151298		1846	-0.000662287					1846	-0.000306146					1846	0.00112025
1847	-0.00258876					1847	-0.000790062					1847	0.000160655					1847	-0.000285291		1847	-0.000352558		1847	-5.21112e-05		1847	0.000269637					1847	-0.000210013					1847	-0.000712129
1848	-0.00276684					1848	-0.00159816					1848	0.00039569					1848	-1.78493e-05		1848	-0.000825143		1848	-0.000833177		1848	0.00113147					1848	-0.000282639					1848	-0.00346286
1849	-0.00196567					1849	-0.000515116					1849	0.000670725					1849	-2.04074e-05		1849	-0.00132739		1849	-0.000245003		1849	0.00153331					1849	0.000838458					1849	-0.00431868
1850	-0.0018845					1850	0.00010793					1850	0.00053576					1850	0.000517035		1850	-0.00176964		1850	0.000383172		1850	0.00189514					1850	0.000609556					1850	-0.0021745
1851	-0.000783333					1851	0.000330977					1851	7.07953e-05					1851	0.000234477		1851	-0.00199189		1851	0.00119135		1851	0.00234698					1851	0.00138065					1851	0.000939677
1852	0.000357835					1852	0.000184023					1852	0.00060583					1852	-0.000418081		1852	-0.00150413		1852	0.00106952		1852	0.00217882					1852	0.00061175					1852	0.00458386
1853	0.000948877					1853	0.000337271					1853	0.000760772					1853	-0.000890743		1853	-0.00113633		1853	0.000957586		1853	0.00114071					1853	0.00102348					1853	0.00765884
1854	0.000559084					1854	0.000341861					1854	0.000615702					1854	-0.00136342		1854	-0.00127818		1854	0.00125493		1854	0.000572613					1854	0.000349389					1854	0.00978914
1855	0.00045929					1855	0.00055645					1855	0.000290631					1855	-0.00153609		1855	-0.000470037		1855	0.00129228		1855	0.000194515					1855	0.000535299					1855	0.00699943
1856	0.000329497					1856	0.00091104					1856	0.000765561					1856	-0.00292877		1856	-0.000241891		1856	-0.00024038		1856	-0.000703583					1856	0.00047121					1856	0.00340973
1857	-0.000530296					1857	0.00136563					1857	-0.000259509					1857	-0.00208144		1857	-0.000293745		1857	7.69653e-05		1857	-0.00169168					1857	0.00162712					1857	-0.00107997
1858	-0.000930101					1858	0.00113024					1858	-0.000844603					1858	-0.00155425		1858	0.000214411		1858	-0.000355698		1858	-0.00104976					1858	0.00179308					1858	-0.00464961
1859	-0.000940768					1859	0.000146338					1859	-0.000649703					1859	-0.000397094		1859	0.000743329		1859	-0.00155904		1859	-3.7827e-05					1859	0.00279333					1859	-0.00856382
1860	-0.000861436					1860	-0.000347561					1860	5.19637e-06					1860	0.000270061		1860	0.00108225		1860	-0.00126237		1860	0.000614103					1860	0.00248357					1860	-0.011038
1861	-0.0013121					1861	4.8539e-05					1861	0.000280096					1861	0.00165721		1861	0.00139116		1861	-0.000475709		1861	0.00110603					1861	0.00171381					1861	-0.0102323
1862	-0.00138277					1862	-0.000825361					1862	0.001125					1862	0.00136437		1862	0.00177008		1862	-0.000399046		1862	0.00121796					1862	0.00146405					1862	-0.00784647
1863	-0.00360344					1863	-0.00229926					1863	0.000259912					1863	0.00082141		1863	-0.000811		1863	-0.00112238		1863	-0.00409009					1863	0.000554297					1863	-0.00587069
1864	-0.0227648					1864	-0.0201019					1864	-0.0127252					1864	-0.00488161		1864	-0.00716097		1864	-0.00786621		1864	-0.0362481					1864	-0.0127323					1864	-0.0127506
1865	-0.0620662					1865	-0.0578944					1865	-0.0387002					1865	-0.0147146		1865	-0.0194008		1865	-0.0186501		1865	-0.0923462					1865	-0.0423884					1865	-0.0290001
1866	-0.115928					1866	-0.110967					1866	-0.0726653					1866	-0.0279976		1866	-0.0332906		1866	-0.031554		1866	-0.166994					1866	-0.0846946					1866	-0.0562595
1867	-0.177599					1867	-0.171619					1867	-0.10967					1867	-0.0397007		1867	-0.0472405		1867	-0.0442578		1867	-0.248012					1867	-0.133881					1867	-0.0887389
1868	-0.225921					1868	-0.221612					1868	-0.135005					1868	-0.0464138		1868	-0.0535003		1868	-0.0489617		1868	-0.30004					1868	-0.174717					1868	-0.115848
1869	-0.240603					1869	-0.239213					1869	-0.13902					1869	-0.043037		1869	-0.0484888		1869	-0.0416559		1869	-0.295948					1869	-0.190681					1869	-0.125125
1870	-0.221515					1870	-0.222165					1870	-0.121175					1870	-0.0286002		1870	-0.0320769		1870	-0.0260902		1870	-0.240406					1870	-0.176424					1870	-0.11641
1871	-0.177207					1871	-0.177906					1871	-0.0885804					1871	-0.00639335		1871	-0.008775		1871	-0.0042745		1871	-0.146294					1871	-0.140528					1871	-0.0935753
1872	-0.118919					1872	-0.117937					1872	-0.0499453					1872	0.0176135		1872	0.0164369		1872	0.0186212		1872	-0.0408423					1872	-0.0910712					1872	-0.0614206
1873	-0.070841					1873	-0.0670984					1873	-0.0213703					1873	0.0359502		1873	0.0355788		1873	0.0338169		1873	0.0301497					1873	-0.0477846					1873	-0.032396
1874	-0.0401935					1874	-0.0356589					1874	-0.00397508					1874	0.0454968		1874	0.0448321		1874	0.0392125		1874	0.0547618					1874	-0.0189567					1874	-0.0120791
1875	-0.0265862					1875	-0.021949					1875	0.00132009					1875	0.0432535		1875	0.0445062		1875	0.0366279		1875	0.0382839					1875	-0.00675815					1875	0.00124898
1876	-0.0250689					1876	-0.0234791					1876	-0.00248474					1876	0.0339601		1876	0.0362503		1876	0.0278334		1876	-0.00333407					1876	-0.00697958					1876	0.00979704
1877	-0.0309716					1877	-0.0337792					1877	-0.0109096					1877	0.0213468		1877	0.0256344		1877	0.0167488		1877	-0.047902					1877	-0.015711					1877	0.0134351
1878	-0.0378343					1878	-0.0429193					1878	-0.0197043					1878	0.0103934		1878	0.0146085		1878	0.00691424		1878	-0.0771799					1878	-0.0251524					1878	0.0143632
1879	-0.0423473					1879	-0.0472289					1879	-0.0265289					1879	0.00415986		1879	0.00695406		1879	0.00200962		1879	-0.0828378					1879	-0.0313432					1879	0.0136427
1880	-0.0422104					1880	-0.047168					1880	-0.0279435					1880	0.00467635		1880	0.00416085		1880	0.000414935		1880	-0.0697456					1880	-0.0323834					1880	0.0107434
1881	-0.0392936					1881	-0.0431871					1881	-0.0272782					1881	0.00888283		1881	0.00537763		1881	0.000920251		1881	-0.0488535					1881	-0.0291637					1881	0.00607421
1882	-0.0341068					1882	-0.0362662					1882	-0.0236228					1882	0.0128993		1882	0.00725441		1882	0.00353557		1882	-0.0290414					1882	-0.0239139					1882	0.000974971
1883	-0.0290299					1883	-0.0296653					1883	-0.0190773					1883	0.0155558		1883	0.00960119		1883	0.00601088		1883	-0.0139192					1883	-0.0181042					1883	-0.00289426
1884	-0.0242933					1884	-0.024354					1884	-0.0144917					1884	0.0161621		1884	0.0116393		1884	0.0069962		1884	-0.00682696					1884	-0.0139342					1884	-0.00551266
1885	-0.0211068					1885	-0.0202622					1885	-0.011966					1885	0.0152184		1885	0.0130392		1885	0.00700152		1885	-0.00453472					1885	-0.0110741					1885	-0.00697988
1886	-0.0179603					1886	-0.0165104					1886	-0.00927031					1886	0.0124548		1886	0.0120292		1886	0.00654685		1886	-0.00479248					1886	-0.00875396					1886	-0.0072471
1887	-0.0152839					1887	-0.0141786					1887	-0.00842463					1887	0.00977109		1887	0.0108991		1887	0.00438217		1887	-0.00719024					1887	-0.00749382					1887	-0.00500432
1888	-0.0129174					1888	-0.0128868					1888	-0.00693894					1888	0.0080374		1888	0.0102191		1888	0.00233749		1888	-0.008358					1888	-0.00681367					1888	-0.000411544
1889	-0.010751					1889	-0.0113348					1889	-0.00683292					1889	0.00630358		1889	0.00970011		1889	0.000492861		1889	-0.00839564					1889	-0.00580365					1889	0.00401163
1890	-0.00883484					1890	-0.00883227					1890	-0.0061069					1890	0.00509976		1890	0.00855369		1890	-0.00152167		1890	-0.00841329					1890	-0.00492392					1890	0.00763573
1891	-0.00772864					1891	-0.00687973					1891	-0.00523088					1891	0.00331594		1891	0.00785727		1891	-0.0015262		1891	-0.00738093					1891	-0.00546419					1891	0.00997982
1892	-0.00726245					1892	-0.00541719					1892	-0.00310486					1892	0.00196211		1892	0.00671085		1892	-0.00123073		1892	-0.00489858					1892	-0.00543446					1892	0.00985392
1893	-0.00533625					1893	-0.00441465					1893	-0.00173884					1893	0.000718291		1893	0.00517443		1893	-0.00159526		1893	-0.00357623					1893	-0.00544473					1893	0.00706802
1894	-0.00380008					1894	-0.004412					1894	0.000837574					1894	0.000784329		1894	0.00401876		1894	-0.00134974		1894	-0.00205374					1894	-0.00497521					1894	0.00562223
1895	-0.00215405					1895	-0.00593884					1895	0.001514					1895	0.000440359		1895	0.00144646		1895	-8.39844e-05		1895	-6.12568e-05					1895	-0.00420669					1895	0.00469695
1896	-0.00119802					1896	-0.00705567					1896	0.00281044					1896	0.00111639		1896	0.000714156		1896	-0.00043823		1896	0.000961231					1896	-0.00294818					1896	0.00437168
1897	-0.000261994					1897	-0.00773251					1897	0.00302687					1897	0.00164242		1897	0.000631854		1897	-0.000132476		1897	0.00168372					1897	-0.00225966					1897	0.0029864
1898	-0.000725964					1898	-0.00751934					1898	0.0021833					1898	0.000928451		1898	0.000449552		1898	0.000343278		1898	0.00240621					1898	-0.00301114					1898	0.00135112
1899	-0.00178994					1899	-0.00669615					1899	0.00158012					1899	-0.000165636		1899	-0.000342463		1899	0.000339059		1899	0.00322882					1899	-0.00343274					1899	-0.000194157
1900	-0.00197397					1900	-0.00506249					1900	0.00206703					1900	-0.000519748		1900	0.00118983		1900	-0.000284765		1900	0.00339146					1900	-0.00391623					1900	-0.0007695
1901	-0.001338					1901	-0.00350883					1901	0.00157393					1901	-0.000563859		1901	0.00123212		1901	0.000351412		1901	0.0038541					1901	-0.00438972					1901	0.000185156
1902	-0.00159204					1902	-0.00169517					1902	0.000670838					1902	-0.00017797		1902	0.00182442		1902	-4.24115e-05		1902	0.00357673					1902	-0.00478321					1902	0.00316981
1903	-0.00118607					1903	-0.00139151					1903	0.000847743					1903	0.000497918		1903	0.00136671		1903	-0.000126235		1903	0.00273937					1903	-0.0035267					1903	0.00604447
1904	-5.01016e-05					1904	-0.00129784					1904	-0.000174966					1904	0.000783708		1904	0.001139		1904	-0.000150058		1904	0.000552133					1904	-0.00236019					1904	0.00683913
1905	-0.000204098					1905	-0.00184384					1905	-0.000627522					1905	0.00085946		1905	6.60803e-05		1905	-0.000643352		1905	-0.00027506					1905	-0.00238633					1905	0.00626306
1906	0.000121909					1906	-0.00244981					1906	-0.000530079					1906	0.000555211		1906	-0.000476555		1906	-0.00150661		1906	-0.000892252					1906	-0.00246262					1906	0.00352696
1907	0.00141791					1907	-0.00276578					1907	-0.00103264					1907	-0.000609038		1907	-0.00193919		1907	-0.00196988		1907	0.000190555					1907	-0.00166892					1907	0.000370857
1908	0.00163392					1908	-0.00253175					1908	-0.00176519					1908	-0.000903286		1908	-0.00148182		1908	-0.00163314		1908	0.00126336					1908	-0.00176521					1908	-0.00206525
1909	0.000329927					1909	-0.00249773					1909	-0.00245739					1909	-0.000767615		1909	-0.00140446		1909	-0.0017964		1909	0.00242628					1909	-0.00335151					1909	-0.00394135
1910	4.60497e-05					1910	-0.0022935					1910	-0.00292934					1910	-0.001822		1910	-0.00143252		1910	-0.000879072		1910	0.00202928					1910	-0.00400078					1910	-0.00556865
1911	-0.000607803					1911	-0.00181923					1911	-0.00287129					1911	-0.00219638		1911	-0.0008696		1911	-0.000341616		1911	0.00180227					1911	-0.00363068					1911	-0.00641621
1912	-0.00128166					1912	-0.00136496					1912	-0.00140325					1912	-0.00207076		1912	-0.000216685		1912	-0.000264159		1912	7.52645e-05					1912	-0.00378058					1912	-0.00658377
1913	-0.00110551					1913	-0.000930698					1913	-0.000885202					1913	-0.00214514		1913	0.00031623		1913	-0.000986703		1913	-0.000671741					1913	-0.00362048					1913	-0.00693132
1914	-0.000279361					1914	-0.00010643					1914	-0.000526834					1914	-0.00165958		1914	0.000489146		1914	-0.000999247		1914	-0.000788648					1914	-0.00302039					1914	-0.00673888
1915	-0.000303042					1915	0.000857916					1915	0.000151879					1915	-0.000434094		1915	0.000986318		1915	-0.000501135		1915	-0.000845449					1915	-0.00239339					1915	-0.00499795
1916	-0.000846651					1916	0.00154229					1916	-0.000929409					1916	-0.000658603		1916	0.000925262		1916	-0.00018275		1916	-0.00160225					1916	-0.00195769					1916	-0.00366766
1917	-0.00162026					1917	0.00163667					1917	-0.0019607					1917	-0.000493113		1917	0.000314205		1917	0.000745634		1917	-0.00230905					1917	-0.00206199					1917	-0.00370736
1918	-0.00159387					1918	0.00191105					1918	-0.00171198					1918	-0.000127622		1918	-0.000846851		1918	0.00177402		1918	-0.00227585					1918	-0.00182629					1918	-0.00307707
1919	-0.00143748					1919	0.00168543					1919	-0.000883004					1919	-0.00123218		1919	-0.000737908		1919	0.0031624		1919	-0.00227257					1919	-0.00179059					1919	-0.000736769
1920	-0.00147088					1920	0.0010498					1920	-0.00223356					1920	-0.00239681		1920	-0.000335142		1920	0.00316146		1920	-0.00232915					1920	-0.00194783					1920	0.00108186
1921	-0.00108415					1921	5.41585e-05					1921	-0.00183412					1921	-0.00247144		1921	9.03076e-05		1921	0.00253099		1921	-0.00222573					1921	-0.00193712					1921	0.00180932
1922	-0.000197412					1922	-0.00065148					1922	-0.00149467					1922	-0.00277608		1922	0.00104576		1922	0.00229051		1922	-0.00118231					1922	-0.00125641					1922	0.00186677
1923	-0.000490676					1923	-0.000757119					1923	-0.00177523					1923	-0.00335071		1923	0.00264121		1923	0.00216004		1923	-0.00140889					1923	-0.000725697					1923	0.00102423
1924	-0.00137394					1924	-0.000642758					1924	-0.00210559					1924	-0.00276537		1924	0.00246666		1924	0.000229569		1924	-0.000995406					1924	0.000935012					1924	-0.00236831
1925	-0.00100699					1925	9.15346e-05					1925	-0.00141535					1925	-0.00250012		1925	0.00229534		1925	0.000339688		1925	0.000188255					1925	0.00113336					1925	-0.00510251
1926	-0.00141981					1926	0.00090575					1926	-0.00155511					1926	-0.00189488		1926	0.00261769		1926	0.00135048		1926	0.000411917					1926	0.000669033					1926	-0.00579859
1927	-0.00194263					1927	0.00151997					1927	-0.00159488					1927	-0.00156963		1927	0.00229004		1927	0.00199127		1927	0.000425579					1927	0.000434705					1927	-0.00417466
1928	-0.00242544					1928	0.00188418					1928	-0.00147464					1928	-0.00188438		1928	0.000612383		1928	0.000702056		1928	-0.00062076					1928	-0.000139623					1928	-0.00444074
1929	-0.00239826					1929	0.0014684					1929	-0.000804281					1929	-0.000389146		1929	0.000494731		1929	0.000592845		1929	-0.00142706					1929	-0.00134395					1929	-0.00385682
1930	-0.00238088					1930	0.00150252					1930	-0.000163139					1930	0.000705988		1930	0.000299453		1930	-0.000195909		1930	-0.00172314					1930	-0.00162002					1930	-0.00389436
1931	-0.00195315					1931	0.00175646					1931	0.000408002					1931	0.00145112		1931	0.000358584		1931	-0.000983816		1931	-0.00138922					1931	-0.00141931					1931	-0.00478461
1932	-0.00101541					1932	0.000910399					1932	9.91442e-05					1932	0.00179626		1932	0.000627715		1932	-0.00201172		1932	-0.000755304					1932	-0.00100861					1932	-0.00618487
1933	-0.000967681					1933	0.00111434					1933	0.000420286					1933	0.00193139		1933	0.00181685		1933	-0.00095963		1933	0.000128615					1933	-0.000967906					1933	-0.00613513
1934	-0.00158995					1934	0.000938281					1934	0.000531446					1934	0.000376522		1934	0.00279598		1934	0.000102464		1934	0.00018254					1934	-0.0012872					1934	-0.00433539
1935	-0.00236206					1935	0.000952124					1935	-8.63198e-05					1935	-0.000528454		1935	0.00381653		1935	-0.000115132		1935	-0.000333264					1935	-0.00109756					1935	-0.00338671
1936	-0.00157364					1936	-0.000314364					1936	-2.40855e-05					1936	-0.00117343		1936	0.00429179		1936	-0.000911695		1936	-0.000959068					1936	-0.00131142					1936	-0.00160158
1937	-0.00188522					1937	0.000359149					1937	-0.000481851					1937	-0.00125841		1937	0.00519705		1937	-0.00100826		1937	-0.00112487					1937	-0.00228529					1937	-0.00138645
1938	-0.00136681					1938	0.000492661					1938	-0.000919617					1938	-0.000593381		1938	0.00487231		1938	-0.00120482		1938	-0.000660677					1938	-0.00232916					1938	-0.000921324
1939	0.000401609					1939	0.000486174					1939	-0.000837382					1939	-0.000138356		1939	0.00367757		1939	-0.000941385		1939	-0.000866481					1939	-0.00265303					1939	-0.0021262
1940	0.00135013					1940	-4.03876e-05					1940	0.000106011					1940	-0.000313426		1940	0.00204332		1940	0.000522211		1940	-0.000522015					1940	-0.00226729					1940	-0.00311161
1941	0.000949516					1941	0.000322469					1941	0.000709534					1941	-0.000728507		1941	0.000652877		1941	0.00145707		1941	0.00086248					1941	-0.00118466					1941	-0.00399131
1942	0.0015489					1942	5.53259e-05					1942	0.00192306					1942	-0.000153588		1942	-0.000567565		1942	0.00227192		1942	0.000566975					1942	0.000217962					1942	-0.003611
1943	0.00120828					1943	-0.00149182					1943	0.00180658					1943	-5.8668e-05		1943	-0.000758007		1943	0.00191678		1943	0.000241471					1943	0.000400588					1943	-0.0022407
1944	0.000177663					1944	-0.00164896					1944	0.000770101					1944	-0.000243749		1944	-0.000788448		1944	0.00150163		1944	0.000375966					1944	0.000603214					1944	-0.0012504
1945	0.000377045					1945	-0.0017761					1945	-0.000185234					1945	0.000281093		1945	0.00013111		1945	0.000166486		1945	0.000630715					1945	0.00150584					1945	-0.00108009
1946	6.76536e-05					1946	-0.000734115					1946	-0.000780254					1946	0.000165913		1946	0.000162246		1946	0.000542806		1946	-0.000544466					1946	0.00240657					1946	-0.000584647
1947	-0.00021173					1947	-0.000822131					1947	-0.000465273					1947	-0.00100927		1947	0.000153393		1947	0.000449135		1947	0.000160352					1947	0.00182729					1947	-0.00092923
1948	0.000528886					1948	-0.000460148					1948	0.000409707					1948	-0.000714446		1948	-0.000205461		1948	0.00141546		1948	0.000255171					1948	0.00202801					1948	-0.000503813
1949	0.0013895					1949	0.000141836					1949	0.00200469					1949	-0.000679626		1949	0.000255685		1949	0.00116179		1949	0.000409989					1949	0.00233873					1949	-0.0011684
1950	0.000540119					1950	0.00031382					1950	0.00238068					1950	-0.00125486		1950	-0.00123317		1950	0.00170812		1950	-4.98645e-06					1950	0.00145944					1950	-0.00130298
1951	0.000761965					1951	-5.50402e-05					1951	0.00180718					1951	-0.000740127		1951	-0.00146299		1951	0.000695738		1951	-0.000279859					1951	0.000729503					1951	-0.0021718
1952	0.000533988					1952	0.00047598					1952	-0.000126323					1952	-0.000335392		1952	-0.00176295		1952	0.000763538		1952	-0.00132473					1952	0.000979468					1952	-0.00245123
1953	0.000456011					1953	0.000666999					1953	-0.00106983					1953	9.34323e-06		1953	-0.00160291		1953	0.00105134		1953	-0.0010896					1953	0.00133943					1953	-0.00494066
1954	-6.19667e-05					1954	0.000148019					1954	-0.00218333					1954	-8.59215e-05		1954	-0.00172287		1954	0.00174914		1954	-0.000894478					1954	0.0020794					1954	-0.00459008
1955	0.000260056					1955	8.90389e-05					1955	-0.00176602					1955	0.000748787		1955	-0.000962829		1955	0.000786938		1955	-0.000429173					1955	0.00238936					1955	-0.00386951
1956	-8.67898e-05					1956	-1.07281e-05					1956	-0.000868056					1956	0.000663474		1956	-0.00164539		1956	0.0013758		1956	0.000176278					1956	0.000759097					1956	-0.00319247
1957	-0.000993271					1957	-0.000430749					1957	0.00098991					1957	0.00149816		1957	-0.00313878		1957	0.000685012		1957	0.000381729					1957	-0.000171245					1957	-0.00272658
1958	-0.00124975					1958	-0.000950769					1958	0.00144788					1958	0.000592848		1958	-0.00349218		1958	-0.00018578		1958	-0.00040282					1958	-0.00108159					1958	-0.00151068
1959	-0.00115623					1959	-0.00061079					1959	0.00133584					1959	-0.000102466		1959	-0.00312558		1959	-0.000286572		1959	-0.00167737					1959	-0.00123193					1959	-0.00111478
1960	-0.000632714					1960	5.91897e-05					1960	0.000594438					1960	6.2213e-05		1960	-0.00273898		1960	0.000362637		1960	-0.00192173					1960	-0.00134227					1960	-0.00148888
1961	0.000321829					1961	-0.000371539					1961	0.000283858					1961	8.68807e-05		1961	-0.00223553		1961	-0.000667326		1961	-0.00111584					1961	-0.000682736					1961	-0.00273574
1962	0.00130695					1962	-3.26698e-05					1962	-0.000386722					1962	-0.000418452		1962	-0.000773871		1962	-0.000786816		1962	-0.000189949					1962	-0.000363271					1962	-0.00391416
1963	0.00130208					1963	0.000746199					1963	-7.73022e-05					1963	6.21609e-06		1963	-0.000382215		1963	-0.00100631		1963	0.000495941					1963	-0.000593805					1963	-0.00532258
1964	0.000977202					1964	0.000615068					1964	0.000152118					1964	0.000640884		1964	-0.00159056		1964	-0.0019158		1964	0.00201183					1964	-0.00150434					1964	-0.005291
1965	0.000982326					1965	-0.000206063					1965	0.000171974					1965	-0.000684449		1965	-0.0020789		1965	-0.00211529		1965	0.00116792					1965	-0.00164487					1965	-0.00396942
1966	6.83389e-05					1966	-0.000657792					1966	0.000382771					1966	-0.000919782		1966	-0.00184014		1966	-0.00102415		1966	0.000384461					1966	-0.000905294					1966	-0.0020698
1967	0.000185176					1967	-0.00110008					1967	0.00101357					1967	-0.000665115		1967	-0.00199406		1967	-0.00121243		1967	0.000130998					1967	-9.56058e-05					1967	0.000197997
1968	-7.79875e-05					1968	-0.00087236					1968	0.000624366					1968	-0.000160448		1968	-0.00223798		1968	-0.0013707		1968	-0.000152466					1968	0.00116408					1968	0.0025358
1969	0.000578849					1969	-0.000624644					1969	0.000475163					1969	0.00033422		1969	-0.0011019		1969	-0.000558978		1969	-0.00052593					1969	0.00191377					1969	0.00362359
1970	0.000815686					1970	-0.000986928					1970	0.000616207					1970	0.00146889		1970	-0.000185817		1970	0.000152745		1970	0.000600766					1970	0.00192346					1970	0.00386139
1971	0.00181321					1971	-0.000939667					1971	8.82394e-05					1971	0.00143358		1971	0.00076803		1971	-0.000475056		1971	0.0013181					1971	0.00243345					1971	0.00381793
1972	0.00141176					1972	-0.00062309					1972	-0.000109729					1972	0.00117827		1972	0.00184853		1972	-2.21421e-05		1972	0.000735432					1972	0.00212389					1972	0.00490258
1973	0.00197032					1973	-0.00138651					1973	0.000432303					1973	0.00115296		1973	0.00225902		1973	0.000770771		1973	0.00113276					1973	0.00124433					1973	0.00561723
1974	0.00163887					1974	-0.000809935					1974	3.43354e-05					1974	0.00119765		1974	0.00133952		1974	0.000613685		1974	0.0012501					1974	0.000794774					1974	0.00423187
1975	0.000697429					1975	0.000706642					1975	-0.000483547					1975	0.000872345		1975	3.00133e-05		1975	0.000686598		1975	0.000357501					1975	0.000985216					1975	0.00194652
1976	-0.000463576					1976	0.00148294					1976	-0.000960488					1976	0.00100706		1976	-0.00125105		1976	0.00150984		1976	0.000215683					1976	-0.00011414					1976	0.000320411
1977	-0.000543455					1977	0.0011785					1977	-0.00108743					1977	0.00131177		1977	-0.00252611		1977	0.00105394		1977	0.000453864					1977	-0.000292977					1977	-0.00269764
1978	-0.00122333					1978	0.000784067					1978	-0.00175437					1978	0.000846481		1978	-0.00310117		1978	0.000708027		1978	-0.000647954					1978	-1.18139e-05					1978	-0.00489569
1979	-0.00136321					1979	0.000489633					1979	-0.00162131					1979	0.000271192		1979	-0.00260623		1979	0.000202119		1979	-0.00103977					1979	0.00110935					1979	-0.00426374
1980	-0.000313093					1980	0.000455199					1980	-0.00106825					1980	-0.000854096		1980	-0.00202129		1980	-0.00113379		1980	-0.00153159					1980	0.00121051					1980	-0.00107179
1981	0.000627246					1981	0.000310616					1981	0.000135669					1981	-0.000949406		1981	-0.00252723		1981	-0.00160951		1981	-0.00181263					1981	0.000811743					1981	0.00103978
1982	0.000338716					1982	0.000595269					1982	0.000359618					1982	-0.00117472		1982	-0.0034877		1982	-0.00120429		1982	-0.00164364					1982	0.000453331					1982	0.00256942
1983	0.000680185					1983	0.000339921					1983	0.000103568					1983	-0.00133003		1983	-0.00530816		1983	-0.00249906		1983	-0.00410465					1983	0.000444919					1983	0.00387905
1984	-0.0148383					1984	-0.0156554					1984	-0.0109225					1984	-0.00609534		1984	-0.0119586		1984	-0.00787383		1984	-0.0313557					1984	-0.00932349					1984	-0.00348131
1985	-0.0497969					1985	-0.0495708					1985	-0.0339485					1985	-0.0141807		1985	-0.0229591		1985	-0.0179086		1985	-0.0836867					1985	-0.0340519					1985	-0.0247317
1986	-0.0987654					1986	-0.0971562					1986	-0.0647339					1986	-0.024786		1986	-0.0359998		1986	-0.0304233		1986	-0.154527					1986	-0.0704803					1986	-0.0540521
1987	-0.155183					1987	-0.154602					1987	-0.0988491					1987	-0.0366014		1987	-0.0487053		1987	-0.043237		1987	-0.234797					1987	-0.116109					1987	-0.0873544
1988	-0.20311					1988	-0.203229					1988	-0.123204					1988	-0.0437668		1988	-0.0532809		1988	-0.0493607		1988	-0.288868					1988	-0.159957					1988	-0.115957
1989	-0.220867					1989	-0.222185					1989	-0.12679					1989	-0.0388522		1989	-0.0470864		1989	-0.0450144		1989	-0.288408					1989	-0.181265					1989	-0.128209
1990	-0.206765					1990	-0.209131					1990	-0.110485					1990	-0.0256876		1990	-0.0309519		1990	-0.0298881		1990	-0.233818					1990	-0.175173					1990	-0.119351
1991	-0.167002					1991	-0.169247					1991	-0.0800795					1991	-0.0060731		1991	-0.00767746		1991	-0.00808181		1991	-0.140238					1991	-0.145632					1991	-0.0950934
1992	-0.112129					1992	-0.112654					1992	-0.042684					1992	0.0162814		1992	0.0187226		1992	0.0163654		1992	-0.0323973					1992	-0.10049					1992	-0.0609971
1993	-0.0650852					1993	-0.0622111					1993	-0.0138084					1993	0.0333958		1993	0.0362624		1993	0.0342528		1993	0.0411732					1993	-0.0548087					1993	-0.0297608
1994	-0.0335916					1994	-0.030058					1994	0.0026671					1994	0.0393303		1994	0.0442921		1994	0.0423301		1994	0.0668337					1994	-0.0237471					1994	-0.00619456
1995	-0.018388					1995	-0.016045					1995	0.00763263					1995	0.0376348		1995	0.0428519		1995	0.0410674		1995	0.0493242					1995	-0.00776559					1995	0.0072617
1996	-0.0175844					1996	-0.017302					1996	0.00320858					1996	0.0291591		1996	0.0344916		1996	0.0321447		1996	0.00414506					1996	-0.00581405					1996	0.011048
1997	-0.0246403					1997	-0.0271496					1997	-0.00690521					1997	0.0183534		1997	0.0217178		1997	0.0202028		1997	-0.0445038					1997	-0.0121429					1997	0.00849335
1998	-0.0330559					1998	-0.0374273					1998	-0.017849					1998	0.00789765		1998	0.0102931		1998	0.00950114		1998	-0.0758226					1998	-0.0209218					1998	0.00331854
1999	-0.0390616					1999	-0.042155					1999	-0.0257128					1999	0.00309192		1999	0.0037385		1999	0.00337943		1999	-0.0832215					1999	-0.0265708					1999	-0.00293627
2000	-0.0406373					2000	-0.0416227					2000	-0.0290066					2000	0.00381619		2000	0.00132385		2000	0.000677722		2000	-0.0717803					2000	-0.0271797					2000	-0.00682108
2001	-0.0379229					2001	-0.0362604					2001	-0.0285					2001	0.00661033		2001	0.00347921		2001	0.00114601		2001	-0.0511189					2001	-0.0230787					2001	-0.00787589
2002	-0.0319582					2002	-0.0290486					2002	-0.0249932					2002	0.0103643		2002	0.00574178		2002	0.00282493		2002	-0.0314371					2002	-0.0173581					2002	-0.00843115
[truncated: 460 more rows]
