# Supplementary material for: Structural insights into sodium transport by the oxaloacetate decarboxylase sodium pump
Source: eLife. 2020 May 27;9:e53853. doi: 10.7554/eLife.53853 (PMC7274780; doi:10.7554/eLife.53853)
Supplement: Figure 6—source data 2. [file elife-53853-fig6-data2.xlsx]

## Sheet: Sheet1
Buffer	pH	[H+] (mM)	kd_WT (mM)	kd_WT error (mM)	kd_E40A (mM)	kd_E40A error (mM)
Mes	5.55	2.81838	1.99203	0.0228965	3.16456	0.120173
Mes	5.75	1.77828	1.7094	0.0315582	2.74725	0.0520016
Tris	8.45	0.00354813	0.694444	0.0191937	1.51745	0.0534216
Mes	5.79	1.62181	1.5873	0.0325019	2.25225	0.0440812
Citrate	5.79	1.62181	1.60514	0.0417387	2.25734	0.0672615
Bis-Tris	5.79	1.62181	1.50602	0.0163304	2.24215	0.0242313
Hepes	7.2	0.0630957	0.970874	0.0321425	2.18818	0.0847502
Tris	7.2	0.0630957	0.961538	0.0287537	2.15517	0.0928954
Pipes	7.2	0.0630957	1.35685	0.056152	2.34192	0.0702028
Hepes	8.2	0.00630957	0.833333	0.0223611	1.92678	0.0664536
Tris	8.2	0.00630957	0.746269	0.0199376	1.59236	0.0519798
Tricine	8.2	0.00630957	0.819672	0.0117576	1.63399	0.0400487
