# Supplementary material for: Structural insights into sodium transport by the oxaloacetate decarboxylase sodium pump
Source: eLife. 2020 May 27;9:e53853. doi: 10.7554/eLife.53853 (PMC7274780; doi:10.7554/eLife.53853)
Supplement: Figure 6—source data 3. [file elife-53853-fig6-data3.xlsx]

## Sheet: Sheet1
pH 5.79		WT			E40A
Buffer	-DH(H+) (cal/mol)	DH (cal/mol)	DH error (cal/mol)		DH (cal/mol)	DH error (cal/mol)
Citrate	-807.839	-3205	42.8		-2906	47.22
Mes	3537.28	-3375	35.2		-2983	31.81
Bis-Tris	6787.76	-3479	19.07		-2581	15.23
pH 7.2		WT			E40A
Buffer	-DH(H+) (cal/mol)	DH (cal/mol)	DH error (cal/mol)		DH (cal/mol)	DH error (cal/mol)
Pipes	2676.86	-2320	47.52		-2453	40.44
Hepes	4875.72	-3426	51.78		-2197	46.28
Tris	11340.8	-3371	45.95		-1944	45.4
pH 8.2		WT			E40A
Buffer	-DH(H+) (cal/mol)	DH (cal/mol)	DH error (cal/mol)		DH (cal/mol)	DH error (cal/mol)
Hepes	4875.72	-2725	31.78		-1590	29.24
Tricine	7497.61	-3395	20.98		-3110	39.3
Tris	11340.8	-2709	30.48		-1337	22.3
